# Supplementary material
Source: publisher figshare collection journal article supplement (https://acs.figshare.com/ndownloader/files/4554004)
Supplement: Supplementary file 1 [file 4554004]

data_1
 
_audit_creation_method            SHELXL-97 
_chemical_name_systematic         ?
_chemical_name_common             ? 
_chemical_melting_point           ? 
_chemical_formula_moiety          ? 
_chemical_formula_sum             'C30 H40 Ce K N22 O29 Re2' 
_chemical_formula_weight          1724.46 
 
loop_ 
 _atom_type_symbol 
 _atom_type_description 
 _atom_type_scat_dispersion_real 
 _atom_type_scat_dispersion_imag 
 _atom_type_scat_source 
 'C'  'C'   0.0033   0.0016 
 'International Tables Vol C Tables 4.2.6.8 and 6.1.1.4' 
 'H'  'H'   0.0000   0.0000 
 'International Tables Vol C Tables 4.2.6.8 and 6.1.1.4' 
 'N'  'N'   0.0061   0.0033 
 'International Tables Vol C Tables 4.2.6.8 and 6.1.1.4' 
 'O'  'O'   0.0106   0.0060 
 'International Tables Vol C Tables 4.2.6.8 and 6.1.1.4' 
 'Ce'  'Ce'  -0.2486   2.6331 
 'International Tables Vol C Tables 4.2.6.8 and 6.1.1.4' 
 'Re'  'Re'  -1.0185   7.2310 
 'International Tables Vol C Tables 4.2.6.8 and 6.1.1.4' 
 'K'  'K'   0.2009   0.2494 
 'International Tables Vol C Tables 4.2.6.8 and 6.1.1.4' 
 
_symmetry_cell_setting            orthorhombic
_symmetry_space_group_name_H-M    'P n a 21'
 
loop_ 
 _symmetry_equiv_pos_as_xyz 
 'x, y, z' 
 '-x, -y, z+1/2' 
 'x+1/2, -y+1/2, z' 
 '-x+1/2, y+1/2, z+1/2' 
 
_cell_length_a                    20.0520(4) 
_cell_length_b                    19.9954(6) 
_cell_length_c                    11.5863(3) 
_cell_angle_alpha                 90.00 
_cell_angle_beta                  90.00 
_cell_angle_gamma                 90.00 
_cell_volume                      4645.5(2) 
_cell_formula_units_Z             4 
_cell_measurement_temperature     100(2) 
_cell_measurement_reflns_used     83782
_cell_measurement_theta_min       2.88
_cell_measurement_theta_max       25.68
 
_exptl_crystal_description        irregular
_exptl_crystal_colour             colourless
_exptl_crystal_size_max           0.15
_exptl_crystal_size_mid           0.15
_exptl_crystal_size_min           0.12
_exptl_crystal_density_meas       ? 
_exptl_crystal_density_diffrn     2.466 
_exptl_crystal_density_method     'not measured' 
_exptl_crystal_F_000              3332 
_exptl_absorpt_coefficient_mu     6.380 
_exptl_absorpt_correction_type    'multi-scan'
_exptl_absorpt_correction_T_min   0.355
_exptl_absorpt_correction_T_max   0.465
_exptl_absorpt_process_details    
'SCALEPACK (Otwinowski & Minor, 1997)'  
_exptl_special_details
'crystal-to-detector distance 30 mm'
_diffrn_ambient_temperature       100(2)
_diffrn_radiation_wavelength      0.71073 
_diffrn_radiation_type            MoK\a 
_diffrn_radiation_source          'fine-focus sealed tube' 
_diffrn_radiation_monochromator   graphite 
_diffrn_measurement_device_type   
'Nonius Kappa-CCD area-detector diffractometer'  
_diffrn_measurement_method        
'two \f and one\w scans with 2\% steps (245 frames)' 
_diffrn_standards_interval_time   0
_diffrn_standards_number          0
_diffrn_standards_decay_%         0
_diffrn_reflns_number             83782
_diffrn_reflns_av_R_equivalents   0.0337 
_diffrn_reflns_av_sigmaI/netI     0.0293 
_diffrn_reflns_limit_h_min        -24 
_diffrn_reflns_limit_h_max        24 
_diffrn_reflns_limit_k_min        -24 
_diffrn_reflns_limit_k_max        24 
_diffrn_reflns_limit_l_min        -14 
_diffrn_reflns_limit_l_max        14 
_diffrn_reflns_theta_min          2.88 
_diffrn_reflns_theta_max          25.68 
_reflns_number_total              8522 
_reflns_number_gt                 8019 
_reflns_threshold_expression      >2sigma(I) 
 
_computing_data_collection        'COLLECT (Nonius, 1998)'
_computing_cell_refinement        'HKL2000 (Otwinowski & Minor, 1997)'
_computing_data_reduction         'HKL2000 (Otwinowski & Minor, 1997)'
_computing_structure_solution     'SHELXS-97 (Sheldrick, 2008)' 
_computing_structure_refinement   'SHELXL-97 (Sheldrick, 2008)' 
_computing_molecular_graphics     'SHELXTL (Sheldrick, 2008)' 
_computing_publication_material   
'SHELXTL (Sheldrick, 2008); PLATON (Spek, 2003)' 
 
_refine_special_details 
;
 Structure solved by direct methods and subsequent Fourier-difference
 synthesis. Although ADDSYM (PLATON) detects an additional mirror plane
 of pseudo-symmetry, no acceptable model could be found with the space
 group Pnma. All non-hydrogen atoms were refined with anisotropic
 displacement parameters. The H atoms bound to O atoms were found on a 
 Fourier-difference map and all the others were introduced at calculated
 positions. All were treated as riding atoms with an isotropic displacement
 parameter equal to 1.2 times that of the parent atom.
 Refinement of F^2^ against ALL reflections.  The weighted R-factor wR and 
 goodness of fit S are based on F^2^, conventional R-factors R are based 
 on F, with F set to zero for negative F^2^. The threshold expression of 
 F^2^ > 2sigma(F^2^) is used only for calculating R-factors(gt) etc. and is 
 not relevant to the choice of reflections for refinement.  R-factors based 
 on F^2^ are statistically about twice as large as those based on F, and R- 
 factors based on ALL data will be even larger. 
;
_refine_ls_structure_factor_coef  Fsqd  
_refine_ls_matrix_type            full 
_refine_ls_weighting_scheme       calc  
_refine_ls_weighting_details 
 'calc w=1/[\s^2^(Fo^2^)+(0.0376P)^2^+14.4421P] where P=(Fo^2^+2Fc^2^)/3' 
_atom_sites_solution_primary      direct 
_atom_sites_solution_secondary    difmap 
_atom_sites_solution_hydrogens    geom 
_refine_ls_hydrogen_treatment     constr 
_refine_ls_extinction_method      none 
_refine_ls_extinction_coef        ? 
_refine_ls_abs_structure_details 
 'Flack H D (1983), Acta Cryst. A39, 876-881' 
_refine_ls_abs_structure_Flack    0.510(7) 
_refine_ls_number_reflns          8522 
_refine_ls_number_parameters      767 
_refine_ls_number_restraints      19 
_refine_ls_R_factor_all           0.0325 
_refine_ls_R_factor_gt            0.0295 
_refine_ls_wR_factor_ref          0.0743 
_refine_ls_wR_factor_gt           0.0730 
_refine_ls_goodness_of_fit_ref    1.057 
_refine_ls_restrained_S_all       1.058 
_refine_ls_shift/su_max           0.003 
_refine_ls_shift/su_mean          0.000 
_diffrn_measured_fraction_theta_max    0.996 
_diffrn_reflns_theta_full              25.68 
_diffrn_measured_fraction_theta_full   0.996 
_refine_diff_density_max    1.339 
_refine_diff_density_min   -1.300 
_refine_diff_density_rms    0.149 
 
loop_ 
 _atom_site_label 
 _atom_site_type_symbol 
 _atom_site_fract_x 
 _atom_site_fract_y 
 _atom_site_fract_z 
 _atom_site_U_iso_or_equiv 
 _atom_site_adp_type 
 _atom_site_occupancy 
 _atom_site_symmetry_multiplicity 
 _atom_site_calc_flag 
 _atom_site_refinement_flags 
 _atom_site_disorder_assembly 
 _atom_site_disorder_group 
Ce Ce 0.275445(17) 0.489225(17) 0.06166(4) 0.01699(8) Uani 1 1 d . . . 
K K 0.27401(7) 0.48207(8) -0.56188(14) 0.0205(3) Uani 1 1 d . . . 
Re1 Re 0.004763(13) 0.294215(13) 0.03249(2) 0.02039(10) Uani 1 1 d . . . 
Re2 Re 0.502752(12) 0.797900(14) 0.00549(2) 0.01946(10) Uani 1 1 d . . . 
O1 O 0.3986(2) 0.4998(2) 0.0110(5) 0.0184(9) Uani 1 1 d . . . 
O2 O 0.4079(2) 0.4914(2) -0.5098(4) 0.0215(11) Uani 1 1 d . . . 
O3 O 0.2970(2) 0.6102(2) 0.0076(4) 0.0197(10) Uani 1 1 d . . . 
O4 O 0.2903(2) 0.6105(2) -0.5024(4) 0.0237(10) Uani 1 1 d . . . 
O5 O 0.1686(2) 0.5492(2) 0.0056(4) 0.0216(10) Uani 1 1 d . . . 
O6 O 0.1481(2) 0.5568(2) -0.5095(4) 0.0221(10) Uani 1 1 d . . . 
O7 O 0.1839(2) 0.4046(2) 0.0176(4) 0.0189(10) Uani 1 1 d . . . 
O8 O 0.1756(2) 0.3961(2) -0.5001(4) 0.0214(10) Uani 1 1 d . . . 
O9 O 0.3282(2) 0.3724(2) 0.0122(4) 0.0203(10) Uani 1 1 d . . . 
O10 O 0.3338(2) 0.3554(2) -0.5036(4) 0.0223(11) Uani 1 1 d . . . 
O11 O 0.2928(8) 0.4613(8) -0.1387(13) 0.041(3) Uani 1 1 d U . . 
O12 O 0.2944(6) 0.4557(6) -0.3262(10) 0.051(3) Uani 1 1 d U . . 
O13 O 0.2416(5) 0.5378(6) -0.2544(12) 0.074(3) Uani 1 1 d U . . 
O14 O 0.3432(2) 0.5508(2) 0.2238(4) 0.0209(10) Uani 1 1 d . . . 
O15 O 0.2830(2) 0.6418(2) 0.2538(5) 0.0222(10) Uani 1 1 d . . . 
O16 O 0.3913(2) 0.6458(2) 0.2631(6) 0.0294(11) Uani 1 1 d . . . 
O17 O 0.2064(2) 0.5293(3) 0.2294(4) 0.0241(11) Uani 1 1 d . . . 
H17A H 0.2255 0.5727 0.2450 0.029 Uiso 1 1 d R . . 
H17B H 0.1640 0.5306 0.2306 0.029 Uiso 1 1 d R . . 
O18 O 0.2747(2) 0.4108(2) 0.2270(4) 0.0216(10) Uani 1 1 d . . . 
H18A H 0.2367 0.3875 0.2427 0.026 Uiso 1 1 d R . . 
H18B H 0.3152 0.3862 0.2329 0.026 Uiso 1 1 d R . . 
O19 O 0.0319(2) 0.3613(3) 0.1115(4) 0.0260(12) Uani 1 1 d . . . 
O20 O -0.0379(3) 0.2397(3) 0.1207(5) 0.0288(12) Uani 1 1 d . . . 
O21 O -0.0450(3) 0.3193(3) -0.0769(5) 0.0344(13) Uani 1 1 d . . . 
O22 O 0.0718(3) 0.2530(3) -0.0243(6) 0.0383(14) Uani 1 1 d . . . 
O23 O 0.5528(3) 0.8275(3) 0.1162(5) 0.0354(13) Uani 1 1 d . . . 
O24 O 0.5471(2) 0.7431(2) -0.0804(5) 0.0237(11) Uani 1 1 d . . . 
O25 O 0.4762(3) 0.8637(3) -0.0788(4) 0.0255(11) Uani 1 1 d . . . 
O26 O 0.4362(3) 0.7560(2) 0.0605(6) 0.0378(12) Uani 1 1 d . . . 
O27 O 0.0789(2) 0.5642(2) 0.2717(5) 0.0270(11) Uani 1 1 d . . . 
H27A H 0.0913 0.6010 0.2985 0.032 Uiso 1 1 d R . . 
H27B H 0.0642 0.5827 0.2004 0.032 Uiso 1 1 d R . . 
O28 O 0.1522(2) 0.3537(2) 0.2678(5) 0.0267(10) Uani 1 1 d . . . 
H28A H 0.1144 0.3593 0.2309 0.032 Uiso 1 1 d R . . 
H28B H 0.1480 0.3657 0.3310 0.032 Uiso 1 1 d R . . 
O29 O 0.3808(3) 0.3385(3) 0.2641(6) 0.0493(16) Uani 1 1 d . . . 
H29A H 0.3927 0.3399 0.3384 0.059 Uiso 1 1 d R . . 
H29B H 0.3989 0.3067 0.2438 0.059 Uiso 1 1 d R . . 
N1 N 0.4572(3) 0.4497(3) -0.1379(5) 0.0180(12) Uani 1 1 d . . . 
N2 N 0.4401(3) 0.5596(3) -0.1438(5) 0.0196(13) Uani 1 1 d . . . 
N3 N 0.4404(3) 0.5558(3) -0.3547(5) 0.0209(13) Uani 1 1 d . . . 
N4 N 0.4595(3) 0.4459(3) -0.3495(5) 0.0193(12) Uani 1 1 d . . . 
N5 N 0.3603(3) 0.6512(3) -0.1425(5) 0.0194(13) Uani 1 1 d . . . 
N6 N 0.2538(3) 0.6756(3) -0.1394(5) 0.0176(12) Uani 1 1 d . . . 
N7 N 0.2503(3) 0.6740(3) -0.3512(5) 0.0186(12) Uani 1 1 d . . . 
N8 N 0.3565(3) 0.6433(3) -0.3509(5) 0.0200(13) Uani 1 1 d . . . 
N9 N 0.1435(3) 0.6247(3) -0.1387(5) 0.0139(12) Uani 1 1 d . . . 
N10 N 0.0920(3) 0.5264(3) -0.1368(5) 0.0158(12) Uani 1 1 d . . . 
N11 N 0.0876(3) 0.5277(3) -0.3471(5) 0.0160(12) Uani 1 1 d . . . 
N12 N 0.1372(3) 0.6267(3) -0.3517(5) 0.0193(13) Uani 1 1 d . . . 
N13 N 0.1068(3) 0.4071(3) -0.1296(5) 0.0163(12) Uani 1 1 d . . . 
N14 N 0.1836(3) 0.3280(3) -0.1317(5) 0.0212(13) Uani 1 1 d . . . 
N15 N 0.1834(3) 0.3275(3) -0.3405(5) 0.0133(11) Uani 1 1 d . . . 
N16 N 0.1057(3) 0.4065(3) -0.3422(5) 0.0175(12) Uani 1 1 d . . . 
N17 N 0.3001(3) 0.2974(3) -0.1326(5) 0.0177(13) Uani 1 1 d . . . 
N18 N 0.3999(3) 0.3432(3) -0.1347(5) 0.0162(12) Uani 1 1 d . . . 
N19 N 0.4027(3) 0.3385(3) -0.3472(5) 0.0183(12) Uani 1 1 d . . . 
N20 N 0.3004(3) 0.2942(3) -0.3451(5) 0.0176(12) Uani 1 1 d . . . 
N21 N 0.2739(4) 0.4870(4) -0.2391(14) 0.049(3) Uani 1 1 d . . . 
N22 N 0.3398(3) 0.6136(3) 0.2479(5) 0.0190(12) Uani 1 1 d . . . 
C1 C 0.4279(3) 0.5020(3) -0.0815(6) 0.0164(14) Uani 1 1 d . . . 
C2 C 0.4782(3) 0.5468(3) -0.2482(6) 0.0190(13) Uani 1 1 d . . . 
H2 H 0.5201 0.5721 -0.2492 0.023 Uiso 1 1 calc R . . 
C3 C 0.4909(3) 0.4698(3) -0.2451(6) 0.0163(14) Uani 1 1 d . . . 
H3 H 0.5387 0.4592 -0.2433 0.020 Uiso 1 1 calc R . . 
C4 C 0.4321(3) 0.4974(3) -0.4147(6) 0.0190(16) Uani 1 1 d . . . 
C5 C 0.4242(3) 0.6252(4) -0.0999(6) 0.0211(15) Uani 1 1 d . . . 
H5A H 0.4595 0.6559 -0.1216 0.025 Uiso 1 1 calc R . . 
H5B H 0.4228 0.6234 -0.0163 0.025 Uiso 1 1 calc R . . 
C6 C 0.4190(3) 0.6196(3) -0.3994(6) 0.0201(15) Uani 1 1 d . . . 
H6A H 0.4142 0.6160 -0.4825 0.024 Uiso 1 1 calc R . . 
H6B H 0.4534 0.6525 -0.3840 0.024 Uiso 1 1 calc R . . 
C7 C 0.3035(3) 0.6416(4) -0.0838(6) 0.0183(14) Uani 1 1 d . . . 
C8 C 0.2758(3) 0.7051(3) -0.2475(7) 0.0187(14) Uani 1 1 d . . . 
H8 H 0.2692 0.7537 -0.2484 0.022 Uiso 1 1 calc R . . 
C9 C 0.3519(3) 0.6861(3) -0.2513(6) 0.0165(13) Uani 1 1 d . . . 
H9 H 0.3808 0.7255 -0.2575 0.020 Uiso 1 1 calc R . . 
C10 C 0.2978(3) 0.6389(3) -0.4108(6) 0.0200(15) Uani 1 1 d . . . 
C11 C 0.1858(3) 0.6778(4) -0.0962(6) 0.0206(15) Uani 1 1 d . . . 
H11A H 0.1870 0.6756 -0.0126 0.025 Uiso 1 1 calc R . . 
H11B H 0.1662 0.7204 -0.1173 0.025 Uiso 1 1 calc R . . 
C12 C 0.1818(3) 0.6790(3) -0.3925(6) 0.0171(14) Uani 1 1 d . . . 
H12A H 0.1639 0.7220 -0.3691 0.021 Uiso 1 1 calc R . . 
H12B H 0.1823 0.6780 -0.4762 0.021 Uiso 1 1 calc R . . 
C13 C 0.1383(3) 0.5655(3) -0.0831(6) 0.0169(14) Uani 1 1 d . . . 
C14 C 0.0658(3) 0.5583(3) -0.2412(6) 0.0162(12) Uani 1 1 d . . . 
H14 H 0.0172 0.5631 -0.2385 0.019 Uiso 1 1 calc R . . 
C15 C 0.1017(3) 0.6277(3) -0.2424(6) 0.0155(12) Uani 1 1 d . . . 
H15 H 0.0697 0.6647 -0.2387 0.019 Uiso 1 1 calc R . . 
C16 C 0.1271(3) 0.5683(3) -0.4123(5) 0.0160(14) Uani 1 1 d . . . 
C17 C 0.0694(3) 0.4642(4) -0.0884(6) 0.0188(14) Uani 1 1 d . . . 
H17C H 0.0227 0.4581 -0.1073 0.023 Uiso 1 1 calc R . . 
H17D H 0.0731 0.4665 -0.0050 0.023 Uiso 1 1 calc R . . 
C18 C 0.0659(3) 0.4624(3) -0.3879(6) 0.0160(13) Uani 1 1 d . . . 
H18C H 0.0682 0.4618 -0.4715 0.019 Uiso 1 1 calc R . . 
H18D H 0.0196 0.4559 -0.3661 0.019 Uiso 1 1 calc R . . 
C19 C 0.1610(3) 0.3820(3) -0.0724(6) 0.0159(14) Uani 1 1 d . . . 
C20 C 0.1454(3) 0.3147(3) -0.2357(6) 0.0173(12) Uani 1 1 d . . . 
H20 H 0.1256 0.2699 -0.2353 0.021 Uiso 1 1 calc R . . 
C21 C 0.0915(3) 0.3708(3) -0.2364(7) 0.0189(13) Uani 1 1 d . . . 
H21 H 0.0462 0.3524 -0.2357 0.023 Uiso 1 1 calc R . . 
C22 C 0.1574(3) 0.3787(4) -0.4033(6) 0.0191(15) Uani 1 1 d . . . 
C23 C 0.2342(3) 0.2829(3) -0.0886(6) 0.0184(14) Uani 1 1 d . . . 
H23A H 0.2351 0.2855 -0.0050 0.022 Uiso 1 1 calc R . . 
H23B H 0.2222 0.2375 -0.1096 0.022 Uiso 1 1 calc R . . 
C24 C 0.2323(3) 0.2820(3) -0.3861(6) 0.0177(14) Uani 1 1 d . . . 
H24A H 0.2319 0.2851 -0.4697 0.021 Uiso 1 1 calc R . . 
H24B H 0.2196 0.2368 -0.3655 0.021 Uiso 1 1 calc R . . 
C25 C 0.3408(3) 0.3417(3) -0.0776(6) 0.0170(14) Uani 1 1 d . . . 
C26 C 0.4008(3) 0.3017(3) -0.2372(6) 0.0155(12) Uani 1 1 d . . . 
H26 H 0.4357 0.2675 -0.2332 0.019 Uiso 1 1 calc R . . 
C27 C 0.3287(3) 0.2697(3) -0.2385(6) 0.0149(12) Uani 1 1 d . . . 
H27 H 0.3305 0.2208 -0.2365 0.018 Uiso 1 1 calc R . . 
C28 C 0.3435(3) 0.3325(3) -0.4068(5) 0.0148(14) Uani 1 1 d . . . 
C29 C 0.4557(3) 0.3817(3) -0.0936(6) 0.0190(14) Uani 1 1 d . . . 
H29C H 0.4966 0.3592 -0.1156 0.023 Uiso 1 1 calc R . . 
H29D H 0.4541 0.3833 -0.0100 0.023 Uiso 1 1 calc R . . 
C30 C 0.4585(3) 0.3772(3) -0.3873(6) 0.0169(14) Uani 1 1 d . . . 
H30A H 0.4585 0.3766 -0.4710 0.020 Uiso 1 1 calc R . . 
H30B H 0.4992 0.3557 -0.3615 0.020 Uiso 1 1 calc R . . 
 
loop_ 
 _atom_site_aniso_label 
 _atom_site_aniso_U_11 
 _atom_site_aniso_U_22 
 _atom_site_aniso_U_33 
 _atom_site_aniso_U_23 
 _atom_site_aniso_U_13 
 _atom_site_aniso_U_12 
Ce 0.01657(17) 0.01987(16) 0.01453(15) -0.00100(19) 0.00013(15) -0.00001(13) 
K 0.0218(8) 0.0228(8) 0.0167(7) 0.0020(6) 0.0016(6) -0.0016(6) 
Re1 0.02464(15) 0.01838(14) 0.0181(2) 0.00107(11) 0.00523(11) 0.00154(9) 
Re2 0.02207(15) 0.01823(15) 0.0181(2) -0.00016(11) 0.00407(11) 0.00036(9) 
O1 0.016(2) 0.022(2) 0.017(2) 0.0001(18) -0.001(2) -0.0033(17) 
O2 0.018(2) 0.027(3) 0.020(3) 0.002(2) -0.002(2) 0.0011(18) 
O3 0.016(2) 0.021(2) 0.023(2) 0.000(2) -0.0027(19) 0.0009(17) 
O4 0.031(3) 0.023(3) 0.018(3) -0.001(2) 0.000(2) 0.002(2) 
O5 0.022(2) 0.023(2) 0.020(2) 0.006(2) -0.004(2) -0.0038(18) 
O6 0.028(3) 0.024(3) 0.014(2) -0.004(2) 0.007(2) 0.0012(19) 
O7 0.020(2) 0.023(2) 0.014(2) 0.000(2) 0.0003(17) -0.0021(17) 
O8 0.024(2) 0.021(2) 0.019(3) 0.000(2) 0.005(2) 0.0029(19) 
O9 0.017(2) 0.026(2) 0.017(2) -0.005(2) 0.0035(19) -0.0016(17) 
O10 0.021(2) 0.023(3) 0.023(3) 0.004(2) -0.003(2) -0.0031(18) 
O11 0.053(7) 0.040(7) 0.031(6) 0.001(5) 0.007(6) 0.003(6) 
O12 0.059(6) 0.042(6) 0.053(6) -0.018(5) 0.033(5) 0.004(5) 
O13 0.064(5) 0.072(6) 0.085(7) 0.023(6) -0.006(6) 0.025(5) 
O14 0.022(2) 0.019(3) 0.022(3) -0.0005(19) -0.0032(19) 0.0025(19) 
O15 0.021(2) 0.024(3) 0.022(3) -0.004(2) 0.001(2) 0.0082(18) 
O16 0.028(3) 0.024(3) 0.036(3) -0.002(3) -0.001(3) -0.006(2) 
O17 0.019(2) 0.032(3) 0.021(3) -0.005(2) 0.0025(19) 0.006(2) 
O18 0.024(2) 0.022(3) 0.019(2) 0.0008(19) 0.0020(18) 0.003(2) 
O19 0.023(3) 0.029(3) 0.026(3) -0.001(2) 0.003(2) -0.010(2) 
O20 0.027(3) 0.032(3) 0.027(3) 0.003(2) 0.007(2) 0.004(2) 
O21 0.044(3) 0.031(3) 0.027(3) 0.001(3) -0.001(3) 0.004(3) 
O22 0.041(3) 0.026(3) 0.048(4) 0.007(3) 0.021(3) 0.008(2) 
O23 0.049(4) 0.031(3) 0.026(3) -0.003(2) -0.004(3) 0.002(3) 
O24 0.021(2) 0.017(3) 0.033(3) 0.000(2) 0.002(2) -0.0002(19) 
O25 0.028(3) 0.027(3) 0.021(3) 0.005(2) 0.005(2) -0.001(2) 
O26 0.042(3) 0.027(3) 0.044(3) 0.004(3) 0.018(3) 0.005(2) 
O27 0.023(2) 0.034(3) 0.024(3) -0.002(3) -0.001(2) 0.000(2) 
O28 0.022(2) 0.033(3) 0.025(3) -0.004(3) -0.003(2) -0.0012(19) 
O29 0.055(3) 0.077(4) 0.016(3) 0.005(4) 0.005(3) 0.043(3) 
N1 0.019(3) 0.015(3) 0.020(3) -0.002(2) 0.002(2) -0.002(2) 
N2 0.019(3) 0.018(3) 0.022(3) -0.003(2) 0.008(2) 0.000(2) 
N3 0.021(3) 0.018(3) 0.024(3) 0.001(2) -0.002(2) 0.002(2) 
N4 0.020(3) 0.021(3) 0.018(3) 0.002(2) -0.010(2) 0.000(2) 
N5 0.013(3) 0.024(3) 0.021(3) 0.001(2) 0.000(2) 0.000(2) 
N6 0.011(3) 0.019(3) 0.022(3) 0.003(2) 0.000(2) 0.002(2) 
N7 0.013(3) 0.024(3) 0.019(3) -0.002(2) 0.000(2) -0.003(2) 
N8 0.021(3) 0.026(3) 0.013(3) -0.003(2) 0.004(2) 0.001(2) 
N9 0.014(3) 0.014(3) 0.014(3) 0.000(2) -0.007(2) -0.002(2) 
N10 0.015(3) 0.018(3) 0.015(3) 0.001(2) -0.002(2) -0.003(2) 
N11 0.017(3) 0.019(3) 0.013(3) -0.001(2) 0.000(2) 0.001(2) 
N12 0.021(3) 0.021(3) 0.015(3) -0.002(2) 0.003(2) 0.000(2) 
N13 0.019(3) 0.018(3) 0.012(3) 0.000(2) -0.001(2) 0.000(2) 
N14 0.022(3) 0.023(4) 0.019(3) 0.001(3) -0.002(2) 0.003(2) 
N15 0.012(3) 0.015(3) 0.013(3) -0.003(2) 0.006(2) 0.001(2) 
N16 0.022(3) 0.014(3) 0.017(3) 0.004(2) 0.001(2) 0.008(2) 
N17 0.012(3) 0.025(3) 0.016(3) 0.000(2) 0.001(2) -0.001(2) 
N18 0.014(3) 0.017(3) 0.018(3) -0.002(2) -0.002(2) -0.001(2) 
N19 0.020(3) 0.020(3) 0.016(3) 0.003(2) 0.002(2) -0.001(2) 
N20 0.016(3) 0.022(3) 0.015(3) 0.002(2) 0.000(2) 0.001(2) 
N21 0.014(3) 0.015(4) 0.119(11) 0.008(7) -0.005(6) 0.006(3) 
N22 0.021(3) 0.019(3) 0.017(3) 0.003(2) -0.003(2) 0.001(2) 
C1 0.009(3) 0.025(4) 0.015(3) -0.002(3) -0.002(3) 0.001(2) 
C2 0.017(3) 0.022(3) 0.018(3) 0.000(3) 0.001(3) 0.000(2) 
C3 0.018(3) 0.023(3) 0.008(3) 0.000(3) -0.002(3) -0.003(2) 
C4 0.014(3) 0.018(3) 0.025(4) 0.002(3) 0.005(3) -0.004(2) 
C5 0.013(3) 0.023(4) 0.027(4) -0.001(3) -0.008(3) 0.001(3) 
C6 0.015(3) 0.021(4) 0.024(4) 0.007(3) 0.001(3) 0.005(3) 
C7 0.025(4) 0.018(4) 0.012(3) -0.001(3) 0.000(3) 0.001(3) 
C8 0.014(3) 0.019(3) 0.023(4) -0.002(3) -0.001(3) -0.003(2) 
C9 0.015(3) 0.019(3) 0.016(4) 0.002(3) -0.001(3) 0.002(2) 
C10 0.016(3) 0.017(3) 0.027(4) 0.006(3) -0.006(3) -0.004(2) 
C11 0.015(3) 0.025(4) 0.021(4) -0.007(3) 0.001(3) -0.003(3) 
C12 0.011(3) 0.022(3) 0.018(3) 0.001(3) -0.001(2) 0.000(2) 
C13 0.014(3) 0.021(4) 0.016(3) -0.002(3) -0.001(3) -0.004(3) 
C14 0.019(3) 0.020(3) 0.009(3) 0.004(3) -0.001(3) 0.003(2) 
C15 0.016(3) 0.017(3) 0.014(3) -0.001(3) -0.002(3) 0.002(2) 
C16 0.019(3) 0.015(3) 0.013(4) 0.003(2) -0.005(2) -0.003(2) 
C17 0.023(4) 0.020(4) 0.013(3) 0.005(3) 0.000(3) -0.001(3) 
C18 0.019(3) 0.015(3) 0.014(3) 0.002(3) -0.003(3) 0.001(3) 
C19 0.016(3) 0.017(4) 0.015(3) 0.004(3) 0.002(3) 0.001(3) 
C20 0.016(3) 0.021(3) 0.015(3) 0.001(3) 0.004(3) -0.001(2) 
C21 0.019(3) 0.022(3) 0.015(3) 0.000(3) -0.004(3) 0.001(2) 
C22 0.017(3) 0.020(4) 0.021(4) 0.002(3) 0.000(3) -0.003(3) 
C23 0.014(3) 0.018(4) 0.024(4) 0.004(3) 0.000(3) -0.002(3) 
C24 0.013(3) 0.023(4) 0.018(3) 0.000(3) -0.003(3) 0.003(3) 
C25 0.018(3) 0.015(3) 0.018(4) 0.001(3) 0.004(3) 0.002(3) 
C26 0.016(3) 0.018(3) 0.012(3) 0.005(3) -0.003(3) 0.002(2) 
C27 0.017(3) 0.016(3) 0.012(3) 0.004(3) 0.004(3) 0.001(2) 
C28 0.018(3) 0.019(3) 0.008(3) -0.001(2) -0.001(2) 0.005(3) 
C29 0.021(3) 0.014(4) 0.022(4) 0.003(3) -0.001(3) 0.005(3) 
C30 0.012(3) 0.024(4) 0.015(3) 0.002(3) 0.002(3) 0.001(3) 
 
_geom_special_details 
; 
 All esds (except the esd in the dihedral angle between two l.s. planes) 
 are estimated using the full covariance matrix.  The cell esds are taken 
 into account individually in the estimation of esds in distances, angles 
 and torsion angles; correlations between esds in cell parameters are only 
 used when they are defined by crystal symmetry.  An approximate (isotropic) 
 treatment of cell esds is used for estimating esds involving l.s. planes. 
;
loop_ 
 _geom_bond_atom_site_label_1 
 _geom_bond_atom_site_label_2 
 _geom_bond_distance 
 _geom_bond_site_symmetry_2 
 _geom_bond_publ_flag 
Ce O11 2.413(14) . ? 
Ce O18 2.475(4) . ? 
Ce O17 2.517(4) . ? 
Ce O3 2.536(4) . ? 
Ce O5 2.539(4) . ? 
Ce O1 2.547(4) . ? 
Ce O7 2.548(4) . ? 
Ce O14 2.625(5) . ? 
Ce O9 2.627(5) . ? 
Ce K 4.3642(16) 1_556 ? 
K O4 2.679(5) . ? 
K O8 2.713(5) . ? 
K O2 2.758(5) . ? 
K O12 2.811(12) . ? 
K O18 2.831(5) 1_554 ? 
K O10 2.882(5) . ? 
K O17 2.929(5) 1_554 ? 
K O6 2.997(5) . ? 
K O14 3.159(5) 1_554 ? 
Re1 O21 1.690(6) . ? 
Re1 O22 1.708(5) . ? 
Re1 O19 1.714(5) . ? 
Re1 O20 1.722(5) . ? 
Re2 O26 1.699(5) . ? 
Re2 O25 1.723(5) . ? 
Re2 O24 1.728(5) . ? 
Re2 O23 1.732(6) . ? 
O1 C1 1.223(9) . ? 
O2 C4 1.210(9) . ? 
O3 C7 1.239(8) . ? 
O4 C10 1.213(8) . ? 
O5 C13 1.237(8) . ? 
O6 C16 1.224(8) . ? 
O7 C19 1.225(8) . ? 
O8 C22 1.230(8) . ? 
O9 C25 1.235(8) . ? 
O10 C28 1.227(8) . ? 
O11 N21 1.33(2) . ? 
O12 N21 1.257(17) . ? 
O13 N21 1.217(13) . ? 
O14 N22 1.287(7) . ? 
O14 K 3.159(5) 1_556 ? 
O15 N22 1.275(6) . ? 
O16 N22 1.228(7) . ? 
O17 K 2.929(5) 1_556 ? 
O17 H17A 0.9643 . ? 
O17 H17B 0.8515 . ? 
O18 K 2.831(5) 1_556 ? 
O18 H18A 0.9116 . ? 
O18 H18B 0.9525 . ? 
O27 H27A 0.8361 . ? 
O27 H27B 0.9520 . ? 
O28 H28A 0.8762 . ? 
O28 H28B 0.7756 . ? 
O29 H29A 0.8933 . ? 
O29 H29B 0.7687 . ? 
N1 C1 1.367(9) . ? 
N1 C29 1.453(9) . ? 
N1 C3 1.470(9) . ? 
N2 C1 1.381(9) . ? 
N2 C5 1.442(9) . ? 
N2 C2 1.454(9) . ? 
N3 C4 1.370(9) . ? 
N3 C6 1.442(9) . ? 
N3 C2 1.459(9) . ? 
N4 C4 1.390(9) . ? 
N4 C30 1.442(9) . ? 
N4 C3 1.445(8) . ? 
N5 C7 1.340(9) . ? 
N5 C9 1.451(9) . ? 
N5 C5 1.468(9) . ? 
N6 C7 1.367(9) . ? 
N6 C11 1.453(9) . ? 
N6 C8 1.454(9) . ? 
N7 C10 1.370(9) . ? 
N7 C8 1.446(9) . ? 
N7 C12 1.458(8) . ? 
N8 C10 1.369(9) . ? 
N8 C9 1.441(9) . ? 
N8 C6 1.453(8) . ? 
N9 C13 1.353(9) . ? 
N9 C11 1.447(9) . ? 
N9 C15 1.466(8) . ? 
N10 C13 1.364(8) . ? 
N10 C17 1.436(9) . ? 
N10 C14 1.466(9) . ? 
N11 C16 1.362(8) . ? 
N11 C14 1.439(9) . ? 
N11 C18 1.454(9) . ? 
N12 C16 1.378(9) . ? 
N12 C15 1.453(9) . ? 
N12 C12 1.455(9) . ? 
N13 C19 1.369(9) . ? 
N13 C17 1.447(9) . ? 
N13 C21 1.466(9) . ? 
N14 C19 1.357(9) . ? 
N14 C23 1.447(9) . ? 
N14 C20 1.452(9) . ? 
N15 C22 1.360(9) . ? 
N15 C24 1.437(8) . ? 
N15 C20 1.457(8) . ? 
N16 C22 1.372(9) . ? 
N16 C21 1.447(9) . ? 
N16 C18 1.472(8) . ? 
N17 C25 1.363(9) . ? 
N17 C23 1.446(8) . ? 
N17 C27 1.462(9) . ? 
N18 C25 1.358(9) . ? 
N18 C29 1.438(9) . ? 
N18 C26 1.448(9) . ? 
N19 C28 1.378(9) . ? 
N19 C30 1.437(8) . ? 
N19 C26 1.472(9) . ? 
N20 C28 1.359(9) . ? 
N20 C27 1.445(9) . ? 
N20 C24 1.466(8) . ? 
C2 C3 1.561(9) . ? 
C2 H2 0.9800 . ? 
C3 H3 0.9800 . ? 
C5 H5A 0.9700 . ? 
C5 H5B 0.9700 . ? 
C6 H6A 0.9700 . ? 
C6 H6B 0.9700 . ? 
C8 C9 1.573(8) . ? 
C8 H8 0.9800 . ? 
C9 H9 0.9800 . ? 
C11 H11A 0.9700 . ? 
C11 H11B 0.9700 . ? 
C12 H12A 0.9700 . ? 
C12 H12B 0.9700 . ? 
C14 C15 1.563(8) . ? 
C14 H14 0.9800 . ? 
C15 H15 0.9800 . ? 
C17 H17C 0.9700 . ? 
C17 H17D 0.9700 . ? 
C18 H18C 0.9700 . ? 
C18 H18D 0.9700 . ? 
C20 C21 1.558(8) . ? 
C20 H20 0.9800 . ? 
C21 H21 0.9800 . ? 
C23 H23A 0.9700 . ? 
C23 H23B 0.9700 . ? 
C24 H24A 0.9700 . ? 
C24 H24B 0.9700 . ? 
C26 C27 1.580(8) . ? 
C26 H26 0.9800 . ? 
C27 H27 0.9800 . ? 
C29 H29C 0.9700 . ? 
C29 H29D 0.9700 . ? 
C30 H30A 0.9700 . ? 
C30 H30B 0.9700 . ? 
 
loop_ 
 _geom_angle_atom_site_label_1 
 _geom_angle_atom_site_label_2 
 _geom_angle_atom_site_label_3 
 _geom_angle 
 _geom_angle_site_symmetry_1 
 _geom_angle_site_symmetry_3 
 _geom_angle_publ_flag 
O11 Ce O18 126.8(4) . . ? 
O11 Ce O17 153.6(4) . . ? 
O18 Ce O17 66.50(15) . . ? 
O11 Ce O3 87.6(4) . . ? 
O18 Ce O3 142.77(15) . . ? 
O17 Ce O3 88.86(16) . . ? 
O11 Ce O5 89.1(4) . . ? 
O18 Ce O5 119.50(15) . . ? 
O17 Ce O5 65.38(15) . . ? 
O3 Ce O5 68.26(14) . . ? 
O11 Ce O1 70.0(4) . . ? 
O18 Ce O1 103.66(15) . . ? 
O17 Ce O1 133.20(16) . . ? 
O3 Ce O1 72.50(14) . . ? 
O5 Ce O1 136.03(15) . . ? 
O11 Ce O7 76.0(4) . . ? 
O18 Ce O7 74.35(15) . . ? 
O17 Ce O7 88.30(15) . . ? 
O3 Ce O7 134.96(14) . . ? 
O5 Ce O7 69.81(14) . . ? 
O1 Ce O7 135.01(14) . . ? 
O11 Ce O14 136.3(4) . . ? 
O18 Ce O14 75.32(15) . . ? 
O17 Ce O14 65.31(15) . . ? 
O3 Ce O14 68.95(15) . . ? 
O5 Ce O14 113.44(14) . . ? 
O1 Ce O14 67.94(15) . . ? 
O7 Ce O14 145.86(14) . . ? 
O11 Ce O9 61.7(4) . . ? 
O18 Ce O9 66.92(15) . . ? 
O17 Ce O9 132.30(16) . . ? 
O3 Ce O9 136.54(15) . . ? 
O5 Ce O9 134.73(15) . . ? 
O1 Ce O9 68.47(13) . . ? 
O7 Ce O9 69.88(13) . . ? 
O14 Ce O9 111.41(14) . . ? 
O4 K O8 128.88(16) . . ? 
O4 K O2 76.14(15) . . ? 
O8 K O2 133.89(16) . . ? 
O4 K O12 85.0(3) . . ? 
O8 K O12 74.4(3) . . ? 
O2 K O12 70.0(3) . . ? 
O4 K O18 134.77(16) . 1_554 ? 
O8 K O18 85.01(15) . 1_554 ? 
O2 K O18 102.59(14) . 1_554 ? 
O12 K O18 138.1(2) . 1_554 ? 
O4 K O10 137.00(15) . . ? 
O8 K O10 71.59(14) . . ? 
O2 K O10 66.62(14) . . ? 
O12 K O10 63.1(2) . . ? 
O18 K O10 76.01(14) 1_554 . ? 
O4 K O17 87.68(15) . 1_554 ? 
O8 K O17 94.92(15) . 1_554 ? 
O2 K O17 127.52(15) . 1_554 ? 
O12 K O17 158.5(3) . 1_554 ? 
O18 K O17 56.71(13) 1_554 1_554 ? 
O10 K O17 132.02(15) . 1_554 ? 
O4 K O6 64.66(14) . . ? 
O8 K O6 69.49(13) . . ? 
O2 K O6 137.92(15) . . ? 
O12 K O6 91.1(2) . . ? 
O18 K O6 115.50(14) 1_554 . ? 
O10 K O6 137.85(14) . . ? 
O17 K O6 67.46(13) 1_554 . ? 
O4 K O14 74.44(14) . 1_554 ? 
O8 K O14 143.37(15) . 1_554 ? 
O2 K O14 73.44(13) . 1_554 ? 
O12 K O14 141.4(3) . 1_554 ? 
O18 K O14 62.46(13) 1_554 1_554 ? 
O10 K O14 112.58(14) . 1_554 ? 
O17 K O14 54.10(13) 1_554 1_554 ? 
O6 K O14 108.18(13) . 1_554 ? 
O21 Re1 O22 108.6(3) . . ? 
O21 Re1 O19 110.8(3) . . ? 
O22 Re1 O19 109.5(3) . . ? 
O21 Re1 O20 109.9(3) . . ? 
O22 Re1 O20 108.3(2) . . ? 
O19 Re1 O20 109.7(3) . . ? 
O26 Re2 O25 110.3(3) . . ? 
O26 Re2 O24 107.9(2) . . ? 
O25 Re2 O24 108.5(2) . . ? 
O26 Re2 O23 110.2(3) . . ? 
O25 Re2 O23 109.7(3) . . ? 
O24 Re2 O23 110.2(3) . . ? 
C1 O1 Ce 132.1(4) . . ? 
C4 O2 K 126.7(4) . . ? 
C7 O3 Ce 135.4(4) . . ? 
C10 O4 K 133.6(4) . . ? 
C13 O5 Ce 138.7(4) . . ? 
C16 O6 K 124.7(4) . . ? 
C19 O7 Ce 133.3(4) . . ? 
C22 O8 K 129.5(4) . . ? 
C25 O9 Ce 135.2(4) . . ? 
C28 O10 K 127.5(4) . . ? 
N21 O11 Ce 135.4(10) . . ? 
N21 O12 K 129.7(10) . . ? 
N22 O14 Ce 125.8(4) . . ? 
N22 O14 K 103.4(3) . 1_556 ? 
Ce O14 K 97.54(14) . 1_556 ? 
Ce O17 K 106.28(16) . 1_556 ? 
Ce O17 H17A 102.2 . . ? 
K O17 H17A 87.4 1_556 . ? 
Ce O17 H17B 124.9 . . ? 
K O17 H17B 117.3 1_556 . ? 
H17A O17 H17B 111.5 . . ? 
Ce O18 K 110.48(17) . 1_556 ? 
Ce O18 H18A 118.9 . . ? 
K O18 H18A 94.6 1_556 . ? 
Ce O18 H18B 112.3 . . ? 
K O18 H18B 101.6 1_556 . ? 
H18A O18 H18B 115.7 . . ? 
H27A O27 H27B 94.1 . . ? 
H28A O28 H28B 109.1 . . ? 
H29A O29 H29B 101.3 . . ? 
C1 N1 C29 122.6(6) . . ? 
C1 N1 C3 113.1(6) . . ? 
C29 N1 C3 124.3(6) . . ? 
C1 N2 C5 122.4(6) . . ? 
C1 N2 C2 112.4(6) . . ? 
C5 N2 C2 124.8(6) . . ? 
C4 N3 C6 122.4(6) . . ? 
C4 N3 C2 112.8(6) . . ? 
C6 N3 C2 124.6(6) . . ? 
C4 N4 C30 122.3(5) . . ? 
C4 N4 C3 112.5(6) . . ? 
C30 N4 C3 125.1(5) . . ? 
C7 N5 C9 114.2(5) . . ? 
C7 N5 C5 121.4(6) . . ? 
C9 N5 C5 124.4(6) . . ? 
C7 N6 C11 122.5(6) . . ? 
C7 N6 C8 112.8(5) . . ? 
C11 N6 C8 124.7(6) . . ? 
C10 N7 C8 113.2(5) . . ? 
C10 N7 C12 121.6(6) . . ? 
C8 N7 C12 125.2(5) . . ? 
C10 N8 C9 112.9(6) . . ? 
C10 N8 C6 121.7(6) . . ? 
C9 N8 C6 124.0(6) . . ? 
C13 N9 C11 121.7(5) . . ? 
C13 N9 C15 112.5(5) . . ? 
C11 N9 C15 125.8(6) . . ? 
C13 N10 C17 122.1(6) . . ? 
C13 N10 C14 111.8(5) . . ? 
C17 N10 C14 125.9(5) . . ? 
C16 N11 C14 113.3(5) . . ? 
C16 N11 C18 121.9(5) . . ? 
C14 N11 C18 124.6(5) . . ? 
C16 N12 C15 112.5(5) . . ? 
C16 N12 C12 122.3(5) . . ? 
C15 N12 C12 125.1(5) . . ? 
C19 N13 C17 122.7(6) . . ? 
C19 N13 C21 113.1(5) . . ? 
C17 N13 C21 124.2(5) . . ? 
C19 N14 C23 123.7(6) . . ? 
C19 N14 C20 113.0(6) . . ? 
C23 N14 C20 122.8(6) . . ? 
C22 N15 C24 122.8(6) . . ? 
C22 N15 C20 112.1(5) . . ? 
C24 N15 C20 123.5(5) . . ? 
C22 N16 C21 112.7(5) . . ? 
C22 N16 C18 122.1(6) . . ? 
C21 N16 C18 125.0(5) . . ? 
C25 N17 C23 120.8(6) . . ? 
C25 N17 C27 113.7(5) . . ? 
C23 N17 C27 125.4(5) . . ? 
C25 N18 C29 122.0(6) . . ? 
C25 N18 C26 113.4(5) . . ? 
C29 N18 C26 124.7(6) . . ? 
C28 N19 C30 123.7(6) . . ? 
C28 N19 C26 111.6(5) . . ? 
C30 N19 C26 124.7(5) . . ? 
C28 N20 C27 113.0(5) . . ? 
C28 N20 C24 121.1(6) . . ? 
C27 N20 C24 126.0(5) . . ? 
O13 N21 O12 118.2(15) . . ? 
O13 N21 O11 127.1(15) . . ? 
O12 N21 O11 114.6(9) . . ? 
O16 N22 O15 120.7(5) . . ? 
O16 N22 O14 119.9(5) . . ? 
O15 N22 O14 119.3(5) . . ? 
O1 C1 N1 126.7(6) . . ? 
O1 C1 N2 125.0(6) . . ? 
N1 C1 N2 108.2(6) . . ? 
N2 C2 N3 114.1(5) . . ? 
N2 C2 C3 104.0(6) . . ? 
N3 C2 C3 103.1(5) . . ? 
N2 C2 H2 111.7 . . ? 
N3 C2 H2 111.7 . . ? 
C3 C2 H2 111.7 . . ? 
N4 C3 N1 114.6(5) . . ? 
N4 C3 C2 103.6(5) . . ? 
N1 C3 C2 102.3(5) . . ? 
N4 C3 H3 111.9 . . ? 
N1 C3 H3 111.9 . . ? 
C2 C3 H3 111.9 . . ? 
O2 C4 N3 126.6(6) . . ? 
O2 C4 N4 125.5(6) . . ? 
N3 C4 N4 107.9(6) . . ? 
N2 C5 N5 113.3(6) . . ? 
N2 C5 H5A 108.9 . . ? 
N5 C5 H5A 108.9 . . ? 
N2 C5 H5B 108.9 . . ? 
N5 C5 H5B 108.9 . . ? 
H5A C5 H5B 107.7 . . ? 
N3 C6 N8 114.0(6) . . ? 
N3 C6 H6A 108.8 . . ? 
N8 C6 H6A 108.8 . . ? 
N3 C6 H6B 108.8 . . ? 
N8 C6 H6B 108.8 . . ? 
H6A C6 H6B 107.7 . . ? 
O3 C7 N5 126.6(7) . . ? 
O3 C7 N6 125.3(6) . . ? 
N5 C7 N6 108.0(6) . . ? 
N7 C8 N6 115.7(5) . . ? 
N7 C8 C9 102.5(5) . . ? 
N6 C8 C9 102.7(5) . . ? 
N7 C8 H8 111.7 . . ? 
N6 C8 H8 111.7 . . ? 
C9 C8 H8 111.7 . . ? 
N8 C9 N5 113.7(5) . . ? 
N8 C9 C8 103.2(5) . . ? 
N5 C9 C8 101.9(5) . . ? 
N8 C9 H9 112.4 . . ? 
N5 C9 H9 112.4 . . ? 
C8 C9 H9 112.4 . . ? 
O4 C10 N8 125.4(7) . . ? 
O4 C10 N7 126.5(6) . . ? 
N8 C10 N7 108.0(6) . . ? 
N9 C11 N6 114.2(6) . . ? 
N9 C11 H11A 108.7 . . ? 
N6 C11 H11A 108.7 . . ? 
N9 C11 H11B 108.7 . . ? 
N6 C11 H11B 108.7 . . ? 
H11A C11 H11B 107.6 . . ? 
N12 C12 N7 115.0(5) . . ? 
N12 C12 H12A 108.5 . . ? 
N7 C12 H12A 108.5 . . ? 
N12 C12 H12B 108.5 . . ? 
N7 C12 H12B 108.5 . . ? 
H12A C12 H12B 107.5 . . ? 
O5 C13 N9 126.0(6) . . ? 
O5 C13 N10 124.3(6) . . ? 
N9 C13 N10 109.7(6) . . ? 
N11 C14 N10 114.2(5) . . ? 
N11 C14 C15 103.3(5) . . ? 
N10 C14 C15 103.2(5) . . ? 
N11 C14 H14 111.8 . . ? 
N10 C14 H14 111.8 . . ? 
C15 C14 H14 111.8 . . ? 
N12 C15 N9 115.7(5) . . ? 
N12 C15 C14 102.8(5) . . ? 
N9 C15 C14 102.8(5) . . ? 
N12 C15 H15 111.6 . . ? 
N9 C15 H15 111.6 . . ? 
C14 C15 H15 111.6 . . ? 
O6 C16 N11 126.8(6) . . ? 
O6 C16 N12 125.2(6) . . ? 
N11 C16 N12 108.0(6) . . ? 
N10 C17 N13 113.0(6) . . ? 
N10 C17 H17C 109.0 . . ? 
N13 C17 H17C 109.0 . . ? 
N10 C17 H17D 109.0 . . ? 
N13 C17 H17D 109.0 . . ? 
H17C C17 H17D 107.8 . . ? 
N11 C18 N16 113.8(5) . . ? 
N11 C18 H18C 108.8 . . ? 
N16 C18 H18C 108.8 . . ? 
N11 C18 H18D 108.8 . . ? 
N16 C18 H18D 108.8 . . ? 
H18C C18 H18D 107.7 . . ? 
O7 C19 N14 126.8(6) . . ? 
O7 C19 N13 125.1(6) . . ? 
N14 C19 N13 108.1(6) . . ? 
N14 C20 N15 112.5(5) . . ? 
N14 C20 C21 103.7(5) . . ? 
N15 C20 C21 103.4(5) . . ? 
N14 C20 H20 112.2 . . ? 
N15 C20 H20 112.2 . . ? 
C21 C20 H20 112.2 . . ? 
N16 C21 N13 115.5(5) . . ? 
N16 C21 C20 102.9(5) . . ? 
N13 C21 C20 102.0(5) . . ? 
N16 C21 H21 111.9 . . ? 
N13 C21 H21 111.9 . . ? 
C20 C21 H21 111.9 . . ? 
O8 C22 N15 125.9(7) . . ? 
O8 C22 N16 125.4(7) . . ? 
N15 C22 N16 108.6(6) . . ? 
N17 C23 N14 113.2(6) . . ? 
N17 C23 H23A 108.9 . . ? 
N14 C23 H23A 108.9 . . ? 
N17 C23 H23B 108.9 . . ? 
N14 C23 H23B 108.9 . . ? 
H23A C23 H23B 107.7 . . ? 
N15 C24 N20 114.2(5) . . ? 
N15 C24 H24A 108.7 . . ? 
N20 C24 H24A 108.7 . . ? 
N15 C24 H24B 108.7 . . ? 
N20 C24 H24B 108.7 . . ? 
H24A C24 H24B 107.6 . . ? 
O9 C25 N18 125.4(6) . . ? 
O9 C25 N17 126.5(6) . . ? 
N18 C25 N17 108.1(6) . . ? 
N18 C26 N19 115.0(5) . . ? 
N18 C26 C27 103.3(5) . . ? 
N19 C26 C27 102.6(5) . . ? 
N18 C26 H26 111.8 . . ? 
N19 C26 H26 111.8 . . ? 
C27 C26 H26 111.8 . . ? 
N20 C27 N17 115.7(5) . . ? 
N20 C27 C26 103.4(5) . . ? 
N17 C27 C26 101.4(5) . . ? 
N20 C27 H27 111.8 . . ? 
N17 C27 H27 111.8 . . ? 
C26 C27 H27 111.8 . . ? 
O10 C28 N20 126.2(6) . . ? 
O10 C28 N19 124.3(6) . . ? 
N20 C28 N19 109.5(5) . . ? 
N18 C29 N1 113.6(5) . . ? 
N18 C29 H29C 108.9 . . ? 
N1 C29 H29C 108.9 . . ? 
N18 C29 H29D 108.9 . . ? 
N1 C29 H29D 108.9 . . ? 
H29C C29 H29D 107.7 . . ? 
N19 C30 N4 115.2(5) . . ? 
N19 C30 H30A 108.5 . . ? 
N4 C30 H30A 108.5 . . ? 
N19 C30 H30B 108.5 . . ? 
N4 C30 H30B 108.5 . . ? 
H30A C30 H30B 107.5 . . ? 
 
loop_ 
 _geom_hbond_atom_site_label_D 
 _geom_hbond_atom_site_label_H 
 _geom_hbond_atom_site_label_A 
 _geom_hbond_distance_DH 
 _geom_hbond_distance_HA 
 _geom_hbond_distance_DA 
 _geom_hbond_angle_DHA 
 _geom_hbond_site_symmetry_A 
O17 H17A O15  0.96 1.80 2.737(7) 162.5 . 
O17 H17B O27  0.85 1.90 2.696(6) 156.2 . 
O18 H18A O28  0.91 1.85 2.750(6) 170.1 . 
O18 H18B O29  0.95 1.66 2.608(7) 170.4 . 
O27 H27A O21  0.84 2.34 2.993(8) 135.2 2_565 
O27 H27B O23  0.95 2.06 2.866(8) 141.9 3_465 
O28 H28A O19  0.88 2.16 3.019(7) 167.8 . 
O28 H28B O8  0.78 2.12 2.859(8) 158.7 1_556 
O29 H29A O10  0.89 2.20 2.871(8) 131.5 1_556 
O29 H29B O20  0.77 2.12 2.804(8) 148.1 3 

#===END

data_2 
 
_audit_creation_method            SHELXL-97 
_chemical_name_systematic         ?
_chemical_name_common             ? 
_chemical_melting_point           ? 
_chemical_formula_moiety          ? 
_chemical_formula_sum             'C30 H44 K N21 O32 Re3 Sm' 
_chemical_formula_weight          1958.91 
 
loop_ 
 _atom_type_symbol 
 _atom_type_description 
 _atom_type_scat_dispersion_real 
 _atom_type_scat_dispersion_imag 
 _atom_type_scat_source 
 'C'  'C'   0.0033   0.0016 
 'International Tables Vol C Tables 4.2.6.8 and 6.1.1.4' 
 'H'  'H'   0.0000   0.0000 
 'International Tables Vol C Tables 4.2.6.8 and 6.1.1.4' 
 'N'  'N'   0.0061   0.0033 
 'International Tables Vol C Tables 4.2.6.8 and 6.1.1.4' 
 'O'  'O'   0.0106   0.0060 
 'International Tables Vol C Tables 4.2.6.8 and 6.1.1.4' 
 'Sm'  'Sm'  -0.1638   3.4418 
 'International Tables Vol C Tables 4.2.6.8 and 6.1.1.4' 
 'Re'  'Re'  -1.0185   7.2310 
 'International Tables Vol C Tables 4.2.6.8 and 6.1.1.4' 
 'K'  'K'   0.2009   0.2494 
 'International Tables Vol C Tables 4.2.6.8 and 6.1.1.4' 
 
_symmetry_cell_setting            orthorhombic
_symmetry_space_group_name_H-M    'P n a 21'
 
loop_ 
 _symmetry_equiv_pos_as_xyz 
 'x, y, z' 
 '-x, -y, z+1/2' 
 'x+1/2, -y+1/2, z' 
 '-x+1/2, y+1/2, z+1/2' 
 
_cell_length_a                    20.0767(8) 
_cell_length_b                    14.1783(3) 
_cell_length_c                    17.7384(7) 
_cell_angle_alpha                 90.00 
_cell_angle_beta                  90.00 
_cell_angle_gamma                 90.00 
_cell_volume                      5049.3(3) 
_cell_formula_units_Z             4 
_cell_measurement_temperature     100(2) 
_cell_measurement_reflns_used     96219
_cell_measurement_theta_min       2.30
_cell_measurement_theta_max       25.68
 
_exptl_crystal_description        platelet
_exptl_crystal_colour             colourless 
_exptl_crystal_size_max           0.15
_exptl_crystal_size_mid           0.10
_exptl_crystal_size_min           0.04
_exptl_crystal_density_meas       ? 
_exptl_crystal_density_diffrn     2.577 
_exptl_crystal_density_method     'not measured' 
_exptl_crystal_F_000              3732 
_exptl_absorpt_coefficient_mu     8.522 
_exptl_absorpt_correction_type    'multi-scan'
_exptl_absorpt_correction_T_min   0.416
_exptl_absorpt_correction_T_max   0.711
_exptl_absorpt_process_details    
'SCALEPACK (Otwinowski & Minor, 1997)'  
_exptl_special_details
'crystal-to-detector distance 30 mm'
_diffrn_ambient_temperature       100(2)
_diffrn_radiation_wavelength      0.71073 
_diffrn_radiation_type            MoK\a 
_diffrn_radiation_source          'fine-focus sealed tube' 
_diffrn_radiation_monochromator   graphite 
_diffrn_measurement_device_type   
'Nonius Kappa-CCD area-detector diffractometer'  
_diffrn_measurement_method        
'two \f and two \w scans with 2\% steps (260 frames)' 
_diffrn_standards_interval_time   0
_diffrn_standards_number          0
_diffrn_standards_decay_%         0
_diffrn_reflns_number             96219
_diffrn_reflns_av_R_equivalents   0.0481 
_diffrn_reflns_av_sigmaI/netI     0.0337 
_diffrn_reflns_limit_h_min        -24 
_diffrn_reflns_limit_h_max        24 
_diffrn_reflns_limit_k_min        -17 
_diffrn_reflns_limit_k_max        17 
_diffrn_reflns_limit_l_min        -21 
_diffrn_reflns_limit_l_max        21 
_diffrn_reflns_theta_min          2.30 
_diffrn_reflns_theta_max          25.68 
_reflns_number_total              9228 
_reflns_number_gt                 8667 
_reflns_threshold_expression      >2sigma(I) 
 
_computing_data_collection        'COLLECT (Nonius, 1998)'
_computing_cell_refinement        'HKL2000 (Otwinowski & Minor, 1997)'
_computing_data_reduction         'HKL2000 (Otwinowski & Minor, 1997)'
_computing_structure_solution     'SHELXS-97 (Sheldrick, 1997)' 
_computing_structure_refinement   'SHELXL-97 (Sheldrick, 1997)' 
_computing_molecular_graphics     'SHELXTL (Sheldrick, 1999)' 
_computing_publication_material   
'SHELXTL (Sheldrick, 1999); PLATON (Spek, 2003)' 
 
_refine_special_details 
;
 Structure solved by direct methods and subsequent Fourier-difference
 synthesis. All non-hydrogen atoms were refined with anisotropic
 displacement parameters, with restraints for the O atoms of one perrhenate
 counter ion (Re3). The H atoms bound to O atoms were found on a 
 Fourier-difference map and all the others were introduced at calculated
 positions. All were treated as riding atoms with an isotropic displacement
 parameter equal to 1.2 times that of the parent atom. The highest residual
 electron density peak is located near Re3, indicating possible unresolved
 disorder.
 Refinement of F^2^ against ALL reflections.  The weighted R-factor wR and 
 goodness of fit S are based on F^2^, conventional R-factors R are based 
 on F, with F set to zero for negative F^2^. The threshold expression of 
 F^2^ > 2sigma(F^2^) is used only for calculating R-factors(gt) etc. and is 
 not relevant to the choice of reflections for refinement.  R-factors based 
 on F^2^ are statistically about twice as large as those based on F, and R- 
 factors based on ALL data will be even larger. 
;
_refine_ls_structure_factor_coef  Fsqd  
_refine_ls_matrix_type            full 
_refine_ls_weighting_scheme       calc  
_refine_ls_weighting_details 
 'calc w=1/[\s^2^(Fo^2^)+(0.0547P)^2^+48.2512P] where P=(Fo^2^+2Fc^2^)/3' 
_atom_sites_solution_primary      direct 
_atom_sites_solution_secondary    difmap 
_atom_sites_solution_hydrogens    geom 
_refine_ls_hydrogen_treatment     constr 
_refine_ls_extinction_method      none 
_refine_ls_extinction_coef        ? 
_refine_ls_abs_structure_details 
 'Flack H D (1983), Acta Cryst. A39, 876-881' 
_refine_ls_abs_structure_Flack    0.529(9) 
_refine_ls_number_reflns          9228 
_refine_ls_number_parameters      794 
_refine_ls_number_restraints      25
_refine_ls_R_factor_all           0.0443 
_refine_ls_R_factor_gt            0.0405 
_refine_ls_wR_factor_ref          0.1011 
_refine_ls_wR_factor_gt           0.0989 
_refine_ls_goodness_of_fit_ref    1.034 
_refine_ls_restrained_S_all       1.037 
_refine_ls_shift/su_max           0.001 
_refine_ls_shift/su_mean          0.000 
_diffrn_measured_fraction_theta_max    0.998 
_diffrn_reflns_theta_full              25.68 
_diffrn_measured_fraction_theta_full   0.998 
_refine_diff_density_max    3.369 
_refine_diff_density_min   -3.198 
_refine_diff_density_rms    0.191 
 
loop_ 
 _atom_site_label 
 _atom_site_type_symbol 
 _atom_site_fract_x 
 _atom_site_fract_y 
 _atom_site_fract_z 
 _atom_site_U_iso_or_equiv 
 _atom_site_adp_type 
 _atom_site_occupancy 
 _atom_site_symmetry_multiplicity 
 _atom_site_calc_flag 
 _atom_site_refinement_flags 
 _atom_site_disorder_assembly 
 _atom_site_disorder_group 
Sm Sm 0.43767(2) 0.58564(3) 0.49791(3) 0.01753(11) Uani 1 1 d . . . 
K K 0.76269(11) 0.76174(15) 0.56412(13) 0.0215(4) Uani 1 1 d . . . 
Re1 Re 0.13235(2) 0.36442(3) 0.75194(3) 0.02804(11) Uani 1 1 d . . . 
Re2 Re 0.29412(2) 0.83548(3) 0.87453(3) 0.02860(11) Uani 1 1 d . . . 
Re3 Re 0.87477(4) 0.29203(4) 0.55991(4) 0.05450(18) Uani 1 1 d . . . 
O1 O 0.4086(3) 0.7304(5) 0.5786(4) 0.0183(15) Uani 1 1 d . . . 
O2 O 0.6802(4) 0.8875(5) 0.6390(4) 0.0232(16) Uani 1 1 d . . . 
O3 O 0.4491(3) 0.7277(5) 0.4220(4) 0.0201(15) Uani 1 1 d . . . 
O4 O 0.7121(4) 0.8993(5) 0.4588(4) 0.0255(17) Uani 1 1 d . . . 
O5 O 0.4969(3) 0.5521(5) 0.3742(4) 0.0228(14) Uani 1 1 d . . . 
O6 O 0.7685(4) 0.7069(5) 0.4195(4) 0.0237(16) Uani 1 1 d . . . 
O7 O 0.5081(3) 0.4461(5) 0.5099(4) 0.0242(16) Uani 1 1 d . . . 
O8 O 0.7893(4) 0.5728(5) 0.5737(4) 0.0231(16) Uani 1 1 d . . . 
O9 O 0.4515(3) 0.5458(5) 0.6394(4) 0.0177(14) Uani 1 1 d . . . 
O10 O 0.7226(4) 0.6939(6) 0.7071(4) 0.0283(17) Uani 1 1 d . . . 
O11 O 0.5409(5) 0.6444(6) 0.5490(6) 0.042(2) Uani 1 1 d . . . 
O12 O 0.6381(5) 0.6888(8) 0.5766(6) 0.051(3) Uani 1 1 d . . . 
O13 O 0.6019(6) 0.6917(10) 0.4616(6) 0.059(3) Uani 1 1 d . . . 
O14 O 0.3345(3) 0.5662(5) 0.5668(4) 0.0213(15) Uani 1 1 d . . . 
H14A H 0.3414 0.5681 0.6122 0.026 Uiso 1 1 d R . . 
H14B H 0.3171 0.5125 0.5524 0.026 Uiso 1 1 d R . . 
O15 O 0.3436(4) 0.6172(5) 0.4117(4) 0.0213(16) Uani 1 1 d . . . 
H15A H 0.2978 0.6170 0.4234 0.026 Uiso 1 1 d R . . 
H15B H 0.3397 0.6704 0.3843 0.026 Uiso 1 1 d R . . 
O16 O 0.3859(4) 0.4437(5) 0.4507(5) 0.0271(17) Uani 1 1 d . . . 
H16A H 0.3466 0.4163 0.4412 0.033 Uiso 1 1 d R . . 
H16B H 0.4102 0.3928 0.4511 0.033 Uiso 1 1 d R . . 
O17 O 0.7985(3) 0.8714(6) 0.7121(4) 0.0236(16) Uani 1 1 d . . . 
H17A H 0.7702 0.9133 0.7127 0.028 Uiso 1 1 d R . . 
H17B H 0.7857 0.8400 0.7508 0.028 Uiso 1 1 d R . . 
O18 O 0.2085(4) 0.4065(6) 0.7236(5) 0.036(2) Uani 1 1 d . . . 
O19 O 0.0758(4) 0.3768(7) 0.6806(6) 0.047(3) Uani 1 1 d . . . 
O20 O 0.1065(5) 0.4263(6) 0.8292(6) 0.044(2) Uani 1 1 d . . . 
O21 O 0.1394(4) 0.2465(6) 0.7725(5) 0.0306(18) Uani 1 1 d . . . 
O22 O 0.3310(6) 0.8334(7) 0.9614(6) 0.055(3) Uani 1 1 d . . . 
O23 O 0.2651(6) 0.7261(7) 0.8574(6) 0.060(3) Uani 1 1 d . . . 
O24 O 0.3537(7) 0.8616(11) 0.8092(9) 0.085(4) Uani 1 1 d . . . 
O25 O 0.2320(4) 0.9156(5) 0.8710(6) 0.038(2) Uani 1 1 d . . . 
O26 O 0.9011(9) 0.3999(12) 0.5555(11) 0.103(3) Uani 1 1 d U . . 
O27 O 0.9040(10) 0.2390(13) 0.4720(10) 0.110(4) Uani 1 1 d U . . 
O28 O 0.7954(9) 0.2817(14) 0.5489(12) 0.117(4) Uani 1 1 d U . . 
O29 O 0.9105(9) 0.2216(12) 0.6223(10) 0.099(3) Uani 1 1 d U . . 
O30 O 0.2647(6) 0.4086(7) 0.5786(6) 0.057(3) Uani 1 1 d . . . 
H30A H 0.2329 0.4188 0.6064 0.069 Uiso 1 1 d R . . 
H30B H 0.2873 0.3622 0.5835 0.069 Uiso 1 1 d R . . 
O31 O 0.3800(5) 0.9989(8) 0.7023(6) 0.050(3) Uani 1 1 d . . . 
H31A H 0.3740 0.9904 0.6543 0.060 Uiso 1 1 d R . . 
H31B H 0.3620 0.9420 0.7217 0.060 Uiso 1 1 d R . . 
O32 O 0.4812(7) 0.8152(10) 0.8980(6) 0.074(4) Uani 1 1 d . . . 
H32A H 0.5212 0.8147 0.9206 0.089 Uiso 1 1 d R . . 
H32B H 0.4608 0.7872 0.9311 0.089 Uiso 1 1 d R . . 
N1 N 0.4723(4) 0.7854(6) 0.6771(5) 0.0212(19) Uani 1 1 d . . . 
N2 N 0.4599(4) 0.8775(6) 0.5755(5) 0.0214(18) Uani 1 1 d . . . 
N3 N 0.5752(5) 0.9236(6) 0.5919(5) 0.0207(18) Uani 1 1 d . . . 
N4 N 0.5815(4) 0.8522(6) 0.7037(5) 0.0218(19) Uani 1 1 d . . . 
N5 N 0.4941(4) 0.8731(6) 0.4462(5) 0.0180(17) Uani 1 1 d . . . 
N6 N 0.5284(4) 0.7935(6) 0.3456(5) 0.0214(18) Uani 1 1 d . . . 
N7 N 0.6396(4) 0.8629(6) 0.3617(5) 0.0200(18) Uani 1 1 d . . . 
N8 N 0.6026(4) 0.9475(6) 0.4594(5) 0.0215(19) Uani 1 1 d . . . 
N9 N 0.5733(4) 0.6431(6) 0.3070(5) 0.0192(18) Uani 1 1 d . . . 
N10 N 0.6052(4) 0.5041(6) 0.3539(5) 0.0201(19) Uani 1 1 d . . . 
N11 N 0.7153(4) 0.5719(6) 0.3804(6) 0.0234(18) Uani 1 1 d . . . 
N12 N 0.6847(4) 0.7095(6) 0.3290(5) 0.0218(19) Uani 1 1 d . . . 
N13 N 0.6153(4) 0.4168(7) 0.4702(5) 0.0217(19) Uani 1 1 d . . . 
N14 N 0.5956(4) 0.4223(6) 0.5921(5) 0.0211(19) Uani 1 1 d . . . 
N15 N 0.7098(4) 0.4677(6) 0.6185(5) 0.0242(19) Uani 1 1 d . . . 
N16 N 0.7267(4) 0.4786(6) 0.4949(5) 0.0205(17) Uani 1 1 d . . . 
N17 N 0.5458(5) 0.4962(7) 0.7022(6) 0.026(2) Uani 1 1 d . . . 
N18 N 0.5040(4) 0.6341(6) 0.7304(5) 0.0214(19) Uani 1 1 d . . . 
N19 N 0.6162(4) 0.6988(6) 0.7538(6) 0.0233(18) Uani 1 1 d . . . 
N20 N 0.6593(4) 0.5613(7) 0.7183(5) 0.0239(19) Uani 1 1 d . . . 
N21 N 0.5880(7) 0.6723(7) 0.5287(5) 0.034(3) Uani 1 1 d . . . 
C1 C 0.4434(5) 0.7895(7) 0.6073(6) 0.020(2) Uani 1 1 d . . . 
C2 C 0.5087(5) 0.9285(7) 0.6214(6) 0.022(2) Uani 1 1 d . . . 
H2 H 0.4948 0.9936 0.6314 0.026 Uiso 1 1 calc R . . 
C3 C 0.5121(5) 0.8687(7) 0.6945(6) 0.021(2) Uani 1 1 d . . . 
H3 H 0.4937 0.9032 0.7376 0.025 Uiso 1 1 calc R . . 
C4 C 0.6188(5) 0.8857(8) 0.6456(6) 0.023(2) Uani 1 1 d . . . 
C5 C 0.4437(5) 0.9004(7) 0.4998(7) 0.0197(19) Uani 1 1 d . . . 
H5A H 0.4367 0.9679 0.4962 0.024 Uiso 1 1 calc R . . 
H5B H 0.4022 0.8696 0.4866 0.024 Uiso 1 1 calc R . . 
C6 C 0.6009(6) 0.9872(7) 0.5329(7) 0.027(2) Uani 1 1 d . . . 
H6A H 0.5733 1.0434 0.5317 0.032 Uiso 1 1 calc R . . 
H6B H 0.6456 1.0065 0.5466 0.032 Uiso 1 1 calc R . . 
C7 C 0.4890(5) 0.7911(7) 0.4070(6) 0.021(2) Uani 1 1 d . . . 
C8 C 0.5689(5) 0.8781(7) 0.3446(6) 0.021(2) Uani 1 1 d . . . 
H8 H 0.5632 0.9133 0.2975 0.025 Uiso 1 1 calc R . . 
C9 C 0.5433(5) 0.9358(7) 0.4137(7) 0.023(2) Uani 1 1 d . . . 
H9 H 0.5240 0.9964 0.3986 0.027 Uiso 1 1 calc R . . 
C10 C 0.6582(5) 0.9016(7) 0.4296(6) 0.019(2) Uani 1 1 d . . . 
C11 C 0.5296(6) 0.7194(8) 0.2908(6) 0.025(2) Uani 1 1 d . . . 
H11A H 0.4848 0.6946 0.2856 0.030 Uiso 1 1 calc R . . 
H11B H 0.5422 0.7463 0.2426 0.030 Uiso 1 1 calc R . . 
C12 C 0.6856(6) 0.8100(7) 0.3161(6) 0.023(2) Uani 1 1 d . . . 
H12A H 0.7302 0.8332 0.3255 0.027 Uiso 1 1 calc R . . 
H12B H 0.6755 0.8216 0.2634 0.027 Uiso 1 1 calc R . . 
C13 C 0.5539(5) 0.5673(7) 0.3485(6) 0.019(2) Uani 1 1 d . . . 
C14 C 0.6679(5) 0.5432(8) 0.3233(6) 0.024(2) Uani 1 1 d . . . 
H14 H 0.6880 0.5017 0.2854 0.029 Uiso 1 1 calc R . . 
C15 C 0.6461(5) 0.6405(8) 0.2891(6) 0.023(2) Uani 1 1 d . . . 
H15 H 0.6541 0.6432 0.2347 0.027 Uiso 1 1 calc R . . 
C16 C 0.7266(5) 0.6662(8) 0.3807(7) 0.025(2) Uani 1 1 d . . . 
C17 C 0.6003(6) 0.4168(7) 0.3891(6) 0.025(2) Uani 1 1 d . . . 
H17C H 0.6304 0.3733 0.3643 0.030 Uiso 1 1 calc R . . 
H17D H 0.5554 0.3930 0.3821 0.030 Uiso 1 1 calc R . . 
C18 C 0.7572(6) 0.5067(8) 0.4234(6) 0.024(2) Uani 1 1 d . . . 
H18A H 0.7997 0.5366 0.4335 0.029 Uiso 1 1 calc R . . 
H18B H 0.7656 0.4509 0.3932 0.029 Uiso 1 1 calc R . . 
C19 C 0.5673(6) 0.4289(7) 0.5226(6) 0.022(2) Uani 1 1 d . . . 
C20 C 0.6669(5) 0.3975(8) 0.5873(7) 0.025(2) Uani 1 1 d . . . 
H20 H 0.6758 0.3350 0.6087 0.030 Uiso 1 1 calc R . . 
C21 C 0.6804(5) 0.3998(7) 0.5010(8) 0.025(2) Uani 1 1 d . . . 
H21 H 0.6998 0.3407 0.4827 0.030 Uiso 1 1 calc R . . 
C22 C 0.7461(5) 0.5142(7) 0.5628(7) 0.023(2) Uani 1 1 d . . . 
C23 C 0.5547(6) 0.4102(8) 0.6594(7) 0.027(2) Uani 1 1 d . . . 
H23A H 0.5113 0.3866 0.6445 0.032 Uiso 1 1 calc R . . 
H23B H 0.5752 0.3631 0.6916 0.032 Uiso 1 1 calc R . . 
C24 C 0.7102(6) 0.4956(8) 0.6971(6) 0.028(2) Uani 1 1 d . . . 
H24A H 0.7055 0.4395 0.7279 0.034 Uiso 1 1 calc R . . 
H24B H 0.7532 0.5233 0.7086 0.034 Uiso 1 1 calc R . . 
C25 C 0.4970(5) 0.5586(7) 0.6852(6) 0.023(2) Uani 1 1 d . . . 
C26 C 0.5648(5) 0.6316(8) 0.7750(6) 0.023(2) Uani 1 1 d . . . 
H26 H 0.5552 0.6342 0.8291 0.028 Uiso 1 1 calc R . . 
C27 C 0.5961(5) 0.5366(7) 0.7523(6) 0.023(2) Uani 1 1 d . . . 
H27 H 0.6028 0.4964 0.7966 0.028 Uiso 1 1 calc R . . 
C28 C 0.6708(6) 0.6564(8) 0.7233(6) 0.021(2) Uani 1 1 d . . . 
C29 C 0.4578(5) 0.7116(7) 0.7293(6) 0.021(2) Uani 1 1 d . . . 
H29A H 0.4139 0.6870 0.7178 0.025 Uiso 1 1 calc R . . 
H29B H 0.4559 0.7386 0.7795 0.025 Uiso 1 1 calc R . . 
C30 C 0.6131(6) 0.8012(8) 0.7659(6) 0.026(2) Uani 1 1 d . . . 
H30C H 0.5885 0.8137 0.8119 0.032 Uiso 1 1 calc R . . 
H30D H 0.6580 0.8251 0.7728 0.032 Uiso 1 1 calc R . . 
 
loop_ 
 _atom_site_aniso_label 
 _atom_site_aniso_U_11 
 _atom_site_aniso_U_22 
 _atom_site_aniso_U_33 
 _atom_site_aniso_U_23 
 _atom_site_aniso_U_13 
 _atom_site_aniso_U_12 
Sm 0.0150(2) 0.0184(2) 0.0192(2) -0.0010(2) -0.0007(2) 0.00025(18) 
K 0.0187(11) 0.0231(11) 0.0227(11) -0.0020(9) 0.0021(9) -0.0018(8) 
Re1 0.0227(2) 0.0321(2) 0.0293(2) 0.0090(2) -0.00274(19) -0.00468(17) 
Re2 0.0275(2) 0.0298(2) 0.0284(2) 0.0017(2) -0.0043(2) 0.00844(18) 
Re3 0.0829(5) 0.0280(3) 0.0527(4) 0.0085(3) -0.0031(3) 0.0044(3) 
O1 0.018(4) 0.019(3) 0.019(4) -0.004(3) -0.001(3) 0.000(3) 
O2 0.019(4) 0.023(4) 0.028(4) -0.005(3) 0.000(3) -0.006(3) 
O3 0.018(4) 0.021(4) 0.021(4) 0.004(3) 0.001(3) -0.006(3) 
O4 0.026(4) 0.027(4) 0.023(4) -0.001(3) 0.002(3) -0.004(3) 
O5 0.025(4) 0.024(3) 0.019(3) -0.006(3) 0.004(3) 0.002(3) 
O6 0.021(4) 0.022(4) 0.028(4) -0.002(3) -0.003(3) 0.003(3) 
O7 0.014(3) 0.024(4) 0.034(5) 0.006(3) -0.004(3) 0.004(3) 
O8 0.021(4) 0.022(4) 0.026(4) 0.004(3) 0.002(3) -0.001(3) 
O9 0.010(3) 0.022(4) 0.021(4) 0.003(3) -0.002(3) 0.000(3) 
O10 0.024(4) 0.042(5) 0.018(4) 0.005(3) -0.003(3) -0.007(4) 
O11 0.028(5) 0.038(5) 0.061(7) -0.002(4) -0.022(5) -0.004(4) 
O12 0.039(5) 0.079(7) 0.035(6) 0.005(5) -0.011(4) -0.015(5) 
O13 0.047(6) 0.099(9) 0.033(6) 0.011(6) -0.001(5) 0.006(6) 
O14 0.019(4) 0.027(4) 0.018(3) -0.003(3) 0.005(3) 0.003(3) 
O15 0.013(4) 0.024(4) 0.027(4) 0.007(3) -0.007(3) -0.003(3) 
O16 0.019(4) 0.024(4) 0.039(5) -0.010(3) 0.005(3) -0.006(3) 
O17 0.014(4) 0.032(4) 0.025(4) 0.002(3) 0.001(3) -0.004(3) 
O18 0.037(5) 0.027(4) 0.044(5) 0.006(4) 0.001(4) -0.015(4) 
O19 0.024(5) 0.055(6) 0.061(7) 0.017(5) -0.015(5) -0.001(4) 
O20 0.045(5) 0.027(5) 0.061(6) -0.005(4) 0.010(5) -0.004(4) 
O21 0.023(4) 0.031(4) 0.037(5) 0.006(3) 0.003(3) -0.013(3) 
O22 0.074(6) 0.037(5) 0.055(6) 0.003(4) -0.037(5) -0.013(4) 
O23 0.095(7) 0.036(5) 0.049(6) -0.007(4) -0.038(5) 0.006(5) 
O24 0.054(6) 0.109(8) 0.091(8) 0.029(6) 0.022(6) 0.025(6) 
O25 0.038(5) 0.032(4) 0.042(5) -0.010(4) -0.004(4) 0.018(3) 
O26 0.115(6) 0.091(6) 0.104(6) 0.007(5) -0.001(5) -0.003(5) 
O27 0.121(6) 0.102(6) 0.106(6) 0.004(5) -0.003(5) 0.004(5) 
O28 0.116(6) 0.115(6) 0.121(6) 0.011(5) -0.006(5) 0.013(5) 
O29 0.097(6) 0.096(6) 0.105(6) 0.020(5) -0.009(5) 0.003(5) 
O30 0.083(8) 0.052(6) 0.037(6) 0.007(5) 0.010(5) -0.029(6) 
O31 0.038(5) 0.068(7) 0.043(6) -0.009(5) 0.004(4) -0.013(5) 
O32 0.080(9) 0.105(10) 0.036(6) -0.016(6) 0.001(6) -0.026(8) 
N1 0.017(4) 0.033(5) 0.014(4) -0.008(4) 0.004(3) 0.001(4) 
N2 0.021(5) 0.020(4) 0.022(5) 0.004(3) -0.005(4) 0.006(4) 
N3 0.023(5) 0.018(4) 0.020(4) 0.003(3) -0.007(4) 0.002(3) 
N4 0.018(4) 0.022(4) 0.026(5) 0.003(4) -0.007(4) -0.011(3) 
N5 0.018(4) 0.020(4) 0.016(4) 0.004(3) -0.001(3) 0.005(3) 
N6 0.014(4) 0.024(4) 0.026(5) 0.003(4) 0.001(4) -0.002(3) 
N7 0.018(4) 0.026(5) 0.016(4) -0.007(3) 0.001(3) 0.001(3) 
N8 0.007(4) 0.028(5) 0.029(5) -0.008(4) 0.004(3) -0.004(3) 
N9 0.009(4) 0.023(4) 0.025(5) -0.005(4) 0.000(3) -0.004(3) 
N10 0.006(4) 0.028(5) 0.027(5) -0.007(4) 0.007(3) -0.004(3) 
N11 0.017(4) 0.033(5) 0.020(4) -0.007(4) -0.006(4) 0.000(4) 
N12 0.016(4) 0.018(4) 0.031(5) 0.002(4) 0.000(4) 0.001(3) 
N13 0.010(4) 0.029(5) 0.026(5) 0.000(4) -0.007(3) 0.003(3) 
N14 0.009(4) 0.022(4) 0.032(5) 0.009(4) 0.004(4) 0.007(3) 
N15 0.022(5) 0.026(5) 0.025(5) 0.006(4) 0.006(4) -0.001(4) 
N16 0.019(4) 0.019(4) 0.024(4) 0.001(4) 0.005(4) -0.004(3) 
N17 0.019(4) 0.027(5) 0.032(5) 0.006(4) 0.001(4) 0.002(4) 
N18 0.013(4) 0.032(5) 0.019(4) -0.003(4) -0.001(3) -0.002(4) 
N19 0.020(4) 0.023(4) 0.027(5) -0.004(4) -0.005(4) -0.001(3) 
N20 0.017(4) 0.031(5) 0.024(5) 0.008(4) -0.006(4) -0.004(4) 
N21 0.063(8) 0.021(5) 0.019(5) 0.005(4) 0.003(5) 0.026(5) 
C1 0.018(5) 0.014(5) 0.029(6) 0.006(4) 0.004(4) 0.005(4) 
C2 0.019(5) 0.021(5) 0.025(5) -0.010(4) 0.007(4) -0.007(4) 
C3 0.026(5) 0.017(5) 0.020(5) 0.000(4) -0.004(4) 0.003(4) 
C4 0.017(5) 0.028(6) 0.024(6) -0.012(4) 0.001(4) 0.010(4) 
C5 0.015(4) 0.023(5) 0.021(5) -0.005(5) 0.002(5) 0.003(4) 
C6 0.030(6) 0.012(5) 0.038(6) 0.006(4) 0.006(5) -0.005(4) 
C7 0.014(5) 0.027(5) 0.022(5) 0.001(4) 0.002(4) 0.005(4) 
C8 0.016(5) 0.013(5) 0.033(6) -0.001(4) 0.001(4) 0.001(4) 
C9 0.018(5) 0.016(5) 0.034(6) 0.004(4) 0.004(5) 0.003(4) 
C10 0.012(5) 0.017(5) 0.028(6) 0.007(4) -0.004(4) 0.002(4) 
C11 0.027(6) 0.036(6) 0.012(5) -0.004(4) -0.009(4) -0.002(5) 
C12 0.035(6) 0.018(5) 0.015(5) 0.007(4) -0.002(4) -0.004(4) 
C13 0.014(5) 0.023(5) 0.019(5) -0.008(4) -0.004(4) 0.006(4) 
C14 0.018(5) 0.036(6) 0.019(5) -0.008(4) 0.004(4) 0.007(4) 
C15 0.011(5) 0.033(6) 0.024(6) -0.001(4) 0.004(4) -0.003(4) 
C16 0.020(5) 0.031(6) 0.024(5) 0.000(5) 0.006(5) 0.001(4) 
C17 0.023(5) 0.023(5) 0.028(6) -0.003(4) 0.001(5) -0.003(4) 
C18 0.025(6) 0.033(6) 0.013(5) -0.001(4) 0.004(4) 0.008(5) 
C19 0.030(6) 0.020(5) 0.015(5) 0.005(4) 0.002(4) -0.002(4) 
C20 0.011(5) 0.026(5) 0.038(6) -0.001(5) 0.001(4) 0.002(4) 
C21 0.018(5) 0.017(5) 0.040(6) -0.005(5) 0.002(5) 0.010(4) 
C22 0.021(5) 0.012(5) 0.035(6) 0.002(4) -0.004(5) -0.001(4) 
C23 0.024(6) 0.030(6) 0.027(6) 0.008(5) 0.004(5) -0.004(5) 
C24 0.033(6) 0.026(6) 0.025(6) 0.010(5) -0.010(5) 0.007(5) 
C25 0.017(5) 0.020(5) 0.032(6) 0.009(4) 0.004(5) -0.003(4) 
C26 0.011(5) 0.045(7) 0.014(5) 0.008(4) -0.003(4) -0.004(4) 
C27 0.020(5) 0.032(6) 0.018(5) 0.004(5) 0.000(5) -0.001(4) 
C28 0.022(6) 0.030(6) 0.013(5) -0.006(4) -0.002(4) 0.005(4) 
C29 0.020(5) 0.027(6) 0.015(5) 0.001(4) -0.005(4) 0.006(4) 
C30 0.025(5) 0.036(6) 0.018(6) 0.002(4) -0.002(4) -0.010(5) 
 
_geom_special_details 
; 
 All esds (except the esd in the dihedral angle between two l.s. planes) 
 are estimated using the full covariance matrix.  The cell esds are taken 
 into account individually in the estimation of esds in distances, angles 
 and torsion angles; correlations between esds in cell parameters are only 
 used when they are defined by crystal symmetry.  An approximate (isotropic) 
 treatment of cell esds is used for estimating esds involving l.s. planes. 
;
loop_ 
 _geom_bond_atom_site_label_1 
 _geom_bond_atom_site_label_2 
 _geom_bond_distance 
 _geom_bond_site_symmetry_2 
 _geom_bond_publ_flag 
Sm O11 2.411(9) . ? 
Sm O16 2.415(7) . ? 
Sm O14 2.421(7) . ? 
Sm O3 2.434(7) . ? 
Sm O7 2.440(7) . ? 
Sm O15 2.471(7) . ? 
Sm O5 2.541(7) . ? 
Sm O1 2.569(7) . ? 
Sm O9 2.588(7) . ? 
Sm K 4.290(2) 3_465 ? 
K O6 2.683(8) . ? 
K O12 2.716(10) . ? 
K O8 2.737(7) . ? 
K O2 2.773(8) . ? 
K O10 2.830(8) . ? 
K O14 2.834(7) 3_565 ? 
K O4 2.886(8) . ? 
K O1 2.944(7) 3_565 ? 
K O17 3.134(8) . ? 
Re1 O20 1.708(10) . ? 
Re1 O19 1.709(9) . ? 
Re1 O18 1.716(8) . ? 
Re1 O21 1.716(8) . ? 
Re2 O23 1.685(10) . ? 
Re2 O25 1.688(7) . ? 
Re2 O24 1.705(13) . ? 
Re2 O22 1.710(10) . ? 
Re3 O28 1.612(19) . ? 
Re3 O26 1.620(17) . ? 
Re3 O29 1.655(16) . ? 
Re3 O27 1.828(19) . ? 
O1 C1 1.204(13) . ? 
O1 K 2.944(7) 3_465 ? 
O2 C4 1.238(13) . ? 
O3 C7 1.232(13) . ? 
O4 C10 1.200(13) . ? 
O5 C13 1.250(13) . ? 
O6 C16 1.230(14) . ? 
O7 C19 1.236(13) . ? 
O8 C22 1.217(13) . ? 
O9 C25 1.236(13) . ? 
O10 C28 1.202(14) . ? 
O11 N21 1.087(15) . ? 
O12 N21 1.337(15) . ? 
O13 N21 1.253(14) . ? 
O14 K 2.834(7) 3_465 ? 
O14 H14A 0.8186 . ? 
O14 H14B 0.8756 . ? 
O15 H15A 0.9428 . ? 
O15 H15B 0.9009 . ? 
O16 H16A 0.8962 . ? 
O16 H16B 0.8710 . ? 
O17 H17A 0.8232 . ? 
O17 H17B 0.8573 . ? 
O30 H30A 0.8186 . ? 
O30 H30B 0.8038 . ? 
O31 H31A 0.8681 . ? 
O31 H31B 0.9488 . ? 
O32 H32A 0.8978 . ? 
O32 H32B 0.8180 . ? 
N1 C1 1.370(14) . ? 
N1 C29 1.426(14) . ? 
N1 C3 1.459(13) . ? 
N2 C1 1.408(13) . ? 
N2 C5 1.419(15) . ? 
N2 C2 1.466(14) . ? 
N3 C4 1.401(14) . ? 
N3 C2 1.436(13) . ? 
N3 C6 1.474(14) . ? 
N4 C4 1.358(15) . ? 
N4 C3 1.423(14) . ? 
N4 C30 1.464(14) . ? 
N5 C7 1.358(14) . ? 
N5 C5 1.441(13) . ? 
N5 C9 1.450(13) . ? 
N6 C7 1.348(14) . ? 
N6 C11 1.431(14) . ? 
N6 C8 1.450(13) . ? 
N7 C10 1.375(14) . ? 
N7 C12 1.439(14) . ? 
N7 C8 1.467(13) . ? 
N8 C10 1.396(14) . ? 
N8 C6 1.421(14) . ? 
N8 C9 1.449(14) . ? 
N9 C13 1.361(14) . ? 
N9 C11 1.421(14) . ? 
N9 C15 1.495(13) . ? 
N10 C13 1.368(13) . ? 
N10 C17 1.391(14) . ? 
N10 C14 1.479(13) . ? 
N11 C16 1.357(14) . ? 
N11 C14 1.448(14) . ? 
N11 C18 1.464(14) . ? 
N12 C16 1.389(15) . ? 
N12 C15 1.435(14) . ? 
N12 C12 1.443(13) . ? 
N13 C19 1.349(14) . ? 
N13 C21 1.437(13) . ? 
N13 C17 1.470(14) . ? 
N14 C19 1.361(14) . ? 
N14 C23 1.459(14) . ? 
N14 C20 1.476(13) . ? 
N15 C22 1.394(14) . ? 
N15 C20 1.428(14) . ? 
N15 C24 1.449(15) . ? 
N16 C22 1.364(15) . ? 
N16 C21 1.456(13) . ? 
N16 C18 1.465(14) . ? 
N17 C25 1.354(14) . ? 
N17 C23 1.447(15) . ? 
N17 C27 1.462(14) . ? 
N18 C25 1.345(14) . ? 
N18 C29 1.439(13) . ? 
N18 C26 1.455(13) . ? 
N19 C28 1.364(14) . ? 
N19 C26 1.454(13) . ? 
N19 C30 1.469(15) . ? 
N20 C28 1.371(15) . ? 
N20 C24 1.433(15) . ? 
N20 C27 1.448(13) . ? 
C2 C3 1.551(15) . ? 
C2 H2 0.9800 . ? 
C3 H3 0.9800 . ? 
C5 H5A 0.9700 . ? 
C5 H5B 0.9700 . ? 
C6 H6A 0.9700 . ? 
C6 H6B 0.9700 . ? 
C8 C9 1.559(15) . ? 
C8 H8 0.9800 . ? 
C9 H9 0.9800 . ? 
C11 H11A 0.9700 . ? 
C11 H11B 0.9700 . ? 
C12 H12A 0.9700 . ? 
C12 H12B 0.9700 . ? 
C14 C15 1.569(16) . ? 
C14 H14 0.9800 . ? 
C15 H15 0.9800 . ? 
C17 H17C 0.9700 . ? 
C17 H17D 0.9700 . ? 
C18 H18A 0.9700 . ? 
C18 H18B 0.9700 . ? 
C20 C21 1.554(18) . ? 
C20 H20 0.9800 . ? 
C21 H21 0.9800 . ? 
C23 H23A 0.9700 . ? 
C23 H23B 0.9700 . ? 
C24 H24A 0.9700 . ? 
C24 H24B 0.9700 . ? 
C26 C27 1.540(16) . ? 
C26 H26 0.9800 . ? 
C27 H27 0.9800 . ? 
C29 H29A 0.9700 . ? 
C29 H29B 0.9700 . ? 
C30 H30C 0.9700 . ? 
C30 H30D 0.9700 . ? 
 
loop_ 
 _geom_angle_atom_site_label_1 
 _geom_angle_atom_site_label_2 
 _geom_angle_atom_site_label_3 
 _geom_angle 
 _geom_angle_site_symmetry_1 
 _geom_angle_site_symmetry_3 
 _geom_angle_publ_flag 
O11 Sm O16 142.0(3) . . ? 
O11 Sm O14 125.8(3) . . ? 
O16 Sm O14 73.3(3) . . ? 
O11 Sm O3 80.9(3) . . ? 
O16 Sm O3 122.6(3) . . ? 
O14 Sm O3 117.0(2) . . ? 
O11 Sm O7 75.5(3) . . ? 
O16 Sm O7 66.7(3) . . ? 
O14 Sm O7 111.1(2) . . ? 
O3 Sm O7 131.6(2) . . ? 
O11 Sm O15 145.9(3) . . ? 
O16 Sm O15 66.9(3) . . ? 
O14 Sm O15 71.2(3) . . ? 
O3 Sm O15 65.2(2) . . ? 
O7 Sm O15 130.1(3) . . ? 
O11 Sm O5 89.3(3) . . ? 
O16 Sm O5 75.3(2) . . ? 
O14 Sm O5 144.6(2) . . ? 
O3 Sm O5 68.5(2) . . ? 
O7 Sm O5 69.7(2) . . ? 
O15 Sm O5 81.8(2) . . ? 
O11 Sm O1 73.1(3) . . ? 
O16 Sm O1 139.6(2) . . ? 
O14 Sm O1 67.4(2) . . ? 
O3 Sm O1 70.7(2) . . ? 
O7 Sm O1 136.9(2) . . ? 
O15 Sm O1 91.5(2) . . ? 
O5 Sm O1 137.5(2) . . ? 
O11 Sm O9 67.6(3) . . ? 
O16 Sm O9 101.6(3) . . ? 
O14 Sm O9 65.0(2) . . ? 
O3 Sm O9 135.0(2) . . ? 
O7 Sm O9 71.1(2) . . ? 
O15 Sm O9 136.2(2) . . ? 
O5 Sm O9 138.3(2) . . ? 
O1 Sm O9 70.0(2) . . ? 
O6 K O12 90.5(3) . . ? 
O6 K O8 76.5(2) . . ? 
O12 K O8 78.6(3) . . ? 
O6 K O2 132.1(2) . . ? 
O12 K O2 69.9(3) . . ? 
O8 K O2 135.8(2) . . ? 
O6 K O10 140.4(2) . . ? 
O12 K O10 62.3(3) . . ? 
O8 K O10 70.6(2) . . ? 
O2 K O10 67.6(2) . . ? 
O6 K O14 104.1(2) . 3_565 ? 
O12 K O14 142.6(3) . 3_565 ? 
O8 K O14 137.9(2) . 3_565 ? 
O2 K O14 75.0(2) . 3_565 ? 
O10 K O14 115.0(2) . 3_565 ? 
O6 K O4 65.9(2) . . ? 
O12 K O4 89.2(3) . . ? 
O8 K O4 140.4(2) . . ? 
O2 K O4 70.4(2) . . ? 
O10 K O4 135.2(2) . . ? 
O14 K O4 66.9(2) 3_565 . ? 
O6 K O1 92.9(2) . 3_565 ? 
O12 K O1 157.6(3) . 3_565 ? 
O8 K O1 80.6(2) . 3_565 ? 
O2 K O1 121.9(2) . 3_565 ? 
O10 K O1 102.6(2) . 3_565 ? 
O14 K O1 57.3(2) 3_565 3_565 ? 
O4 K O1 112.4(2) . 3_565 ? 
O6 K O17 159.1(2) . . ? 
O12 K O17 109.4(3) . . ? 
O8 K O17 112.9(2) . . ? 
O2 K O17 54.3(2) . . ? 
O10 K O17 58.9(2) . . ? 
O14 K O17 56.1(2) 3_565 . ? 
O4 K O17 106.7(2) . . ? 
O1 K O17 71.30(19) 3_565 . ? 
O20 Re1 O19 109.9(5) . . ? 
O20 Re1 O18 109.1(4) . . ? 
O19 Re1 O18 109.8(5) . . ? 
O20 Re1 O21 110.8(4) . . ? 
O19 Re1 O21 108.2(4) . . ? 
O18 Re1 O21 109.1(4) . . ? 
O23 Re2 O25 110.9(5) . . ? 
O23 Re2 O24 108.7(7) . . ? 
O25 Re2 O24 110.3(6) . . ? 
O23 Re2 O22 107.3(5) . . ? 
O25 Re2 O22 111.4(5) . . ? 
O24 Re2 O22 108.2(7) . . ? 
O28 Re3 O26 113.7(9) . . ? 
O28 Re3 O29 117.1(9) . . ? 
O26 Re3 O29 117.5(9) . . ? 
O28 Re3 O27 100.2(10) . . ? 
O26 Re3 O27 104.0(9) . . ? 
O29 Re3 O27 100.5(9) . . ? 
C1 O1 Sm 131.3(6) . . ? 
C1 O1 K 126.0(6) . 3_465 ? 
Sm O1 K 102.0(2) . 3_465 ? 
C4 O2 K 128.8(7) . . ? 
C7 O3 Sm 141.6(7) . . ? 
C10 O4 K 127.9(7) . . ? 
C13 O5 Sm 135.2(7) . . ? 
C16 O6 K 129.8(7) . . ? 
C19 O7 Sm 137.2(7) . . ? 
C22 O8 K 121.3(6) . . ? 
C25 O9 Sm 133.1(6) . . ? 
C28 O10 K 127.6(7) . . ? 
N21 O11 Sm 138.5(10) . . ? 
N21 O12 K 135.0(8) . . ? 
Sm O14 K 109.2(3) . 3_465 ? 
Sm O14 H14A 109.8 . . ? 
K O14 H14A 94.5 3_465 . ? 
Sm O14 H14B 107.0 . . ? 
K O14 H14B 122.7 3_465 . ? 
H14A O14 H14B 112.8 . . ? 
Sm O15 H15A 127.5 . . ? 
Sm O15 H15B 123.5 . . ? 
H15A O15 H15B 92.1 . . ? 
Sm O16 H16A 143.6 . . ? 
Sm O16 H16B 116.6 . . ? 
H16A O16 H16B 97.8 . . ? 
K O17 H17A 102.2 . . ? 
K O17 H17B 110.1 . . ? 
H17A O17 H17B 99.0 . . ? 
H30A O30 H30B 121.3 . . ? 
H31A O31 H31B 100.6 . . ? 
H32A O32 H32B 97.2 . . ? 
C1 N1 C29 122.1(9) . . ? 
C1 N1 C3 112.9(9) . . ? 
C29 N1 C3 124.7(9) . . ? 
C1 N2 C5 121.9(9) . . ? 
C1 N2 C2 111.9(9) . . ? 
C5 N2 C2 124.5(9) . . ? 
C4 N3 C2 110.6(9) . . ? 
C4 N3 C6 120.0(9) . . ? 
C2 N3 C6 123.6(9) . . ? 
C4 N4 C3 113.3(9) . . ? 
C4 N4 C30 120.4(9) . . ? 
C3 N4 C30 126.2(9) . . ? 
C7 N5 C5 121.0(9) . . ? 
C7 N5 C9 111.9(9) . . ? 
C5 N5 C9 125.2(8) . . ? 
C7 N6 C11 122.7(9) . . ? 
C7 N6 C8 111.1(9) . . ? 
C11 N6 C8 126.2(9) . . ? 
C10 N7 C12 121.7(9) . . ? 
C10 N7 C8 112.7(8) . . ? 
C12 N7 C8 125.5(8) . . ? 
C10 N8 C6 123.4(9) . . ? 
C10 N8 C9 113.1(9) . . ? 
C6 N8 C9 122.6(9) . . ? 
C13 N9 C11 122.3(9) . . ? 
C13 N9 C15 112.0(8) . . ? 
C11 N9 C15 125.4(9) . . ? 
C13 N10 C17 124.1(9) . . ? 
C13 N10 C14 111.7(9) . . ? 
C17 N10 C14 124.0(9) . . ? 
C16 N11 C14 113.0(9) . . ? 
C16 N11 C18 121.5(9) . . ? 
C14 N11 C18 124.4(9) . . ? 
C16 N12 C15 110.7(9) . . ? 
C16 N12 C12 122.2(9) . . ? 
C15 N12 C12 127.0(9) . . ? 
C19 N13 C21 114.1(9) . . ? 
C19 N13 C17 121.8(9) . . ? 
C21 N13 C17 124.0(9) . . ? 
C19 N14 C23 120.9(9) . . ? 
C19 N14 C20 111.6(9) . . ? 
C23 N14 C20 124.5(9) . . ? 
C22 N15 C20 111.7(9) . . ? 
C22 N15 C24 123.4(9) . . ? 
C20 N15 C24 124.6(9) . . ? 
C22 N16 C21 113.6(9) . . ? 
C22 N16 C18 123.0(8) . . ? 
C21 N16 C18 122.8(10) . . ? 
C25 N17 C23 121.5(10) . . ? 
C25 N17 C27 112.2(9) . . ? 
C23 N17 C27 124.3(9) . . ? 
C25 N18 C29 122.2(9) . . ? 
C25 N18 C26 113.2(9) . . ? 
C29 N18 C26 124.5(9) . . ? 
C28 N19 C26 112.6(9) . . ? 
C28 N19 C30 121.9(9) . . ? 
C26 N19 C30 125.4(9) . . ? 
C28 N20 C24 122.4(9) . . ? 
C28 N20 C27 111.0(9) . . ? 
C24 N20 C27 125.2(9) . . ? 
O11 N21 O13 126.1(14) . . ? 
O11 N21 O12 120.5(11) . . ? 
O13 N21 O12 113.5(12) . . ? 
O1 C1 N1 126.7(9) . . ? 
O1 C1 N2 125.7(10) . . ? 
N1 C1 N2 107.5(9) . . ? 
N3 C2 N2 113.3(8) . . ? 
N3 C2 C3 103.7(9) . . ? 
N2 C2 C3 102.9(8) . . ? 
N3 C2 H2 112.1 . . ? 
N2 C2 H2 112.1 . . ? 
C3 C2 H2 112.1 . . ? 
N4 C3 N1 115.2(8) . . ? 
N4 C3 C2 103.2(9) . . ? 
N1 C3 C2 104.0(8) . . ? 
N4 C3 H3 111.3 . . ? 
N1 C3 H3 111.3 . . ? 
C2 C3 H3 111.3 . . ? 
O2 C4 N4 128.9(10) . . ? 
O2 C4 N3 123.2(10) . . ? 
N4 C4 N3 107.8(9) . . ? 
N2 C5 N5 113.7(8) . . ? 
N2 C5 H5A 108.8 . . ? 
N5 C5 H5A 108.8 . . ? 
N2 C5 H5B 108.8 . . ? 
N5 C5 H5B 108.8 . . ? 
H5A C5 H5B 107.7 . . ? 
N8 C6 N3 114.7(9) . . ? 
N8 C6 H6A 108.6 . . ? 
N3 C6 H6A 108.6 . . ? 
N8 C6 H6B 108.6 . . ? 
N3 C6 H6B 108.6 . . ? 
H6A C6 H6B 107.6 . . ? 
O3 C7 N6 125.0(10) . . ? 
O3 C7 N5 124.3(10) . . ? 
N6 C7 N5 110.4(9) . . ? 
N6 C8 N7 114.7(8) . . ? 
N6 C8 C9 103.9(8) . . ? 
N7 C8 C9 103.5(8) . . ? 
N6 C8 H8 111.4 . . ? 
N7 C8 H8 111.4 . . ? 
C9 C8 H8 111.4 . . ? 
N8 C9 N5 114.0(9) . . ? 
N8 C9 C8 103.3(8) . . ? 
N5 C9 C8 102.5(8) . . ? 
N8 C9 H9 112.1 . . ? 
N5 C9 H9 112.1 . . ? 
C8 C9 H9 112.1 . . ? 
O4 C10 N7 127.8(10) . . ? 
O4 C10 N8 124.8(10) . . ? 
N7 C10 N8 107.4(8) . . ? 
N9 C11 N6 115.6(8) . . ? 
N9 C11 H11A 108.4 . . ? 
N6 C11 H11A 108.4 . . ? 
N9 C11 H11B 108.4 . . ? 
N6 C11 H11B 108.4 . . ? 
H11A C11 H11B 107.4 . . ? 
N7 C12 N12 114.7(9) . . ? 
N7 C12 H12A 108.6 . . ? 
N12 C12 H12A 108.6 . . ? 
N7 C12 H12B 108.6 . . ? 
N12 C12 H12B 108.6 . . ? 
H12A C12 H12B 107.6 . . ? 
O5 C13 N9 126.6(9) . . ? 
O5 C13 N10 123.4(10) . . ? 
N9 C13 N10 109.8(9) . . ? 
N11 C14 N10 114.1(9) . . ? 
N11 C14 C15 101.9(9) . . ? 
N10 C14 C15 103.5(8) . . ? 
N11 C14 H14 112.2 . . ? 
N10 C14 H14 112.2 . . ? 
C15 C14 H14 112.2 . . ? 
N12 C15 N9 113.9(9) . . ? 
N12 C15 C14 104.9(9) . . ? 
N9 C15 C14 102.3(8) . . ? 
N12 C15 H15 111.7 . . ? 
N9 C15 H15 111.7 . . ? 
C14 C15 H15 111.7 . . ? 
O6 C16 N11 125.5(10) . . ? 
O6 C16 N12 125.3(10) . . ? 
N11 C16 N12 109.3(9) . . ? 
N10 C17 N13 115.1(9) . . ? 
N10 C17 H17C 108.5 . . ? 
N13 C17 H17C 108.5 . . ? 
N10 C17 H17D 108.5 . . ? 
N13 C17 H17D 108.5 . . ? 
H17C C17 H17D 107.5 . . ? 
N11 C18 N16 112.5(9) . . ? 
N11 C18 H18A 109.1 . . ? 
N16 C18 H18A 109.1 . . ? 
N11 C18 H18B 109.1 . . ? 
N16 C18 H18B 109.1 . . ? 
H18A C18 H18B 107.8 . . ? 
O7 C19 N13 125.9(10) . . ? 
O7 C19 N14 125.5(10) . . ? 
N13 C19 N14 108.5(9) . . ? 
N15 C20 N14 113.3(9) . . ? 
N15 C20 C21 105.2(9) . . ? 
N14 C20 C21 102.8(9) . . ? 
N15 C20 H20 111.7 . . ? 
N14 C20 H20 111.7 . . ? 
C21 C20 H20 111.7 . . ? 
N13 C21 N16 115.0(9) . . ? 
N13 C21 C20 102.6(8) . . ? 
N16 C21 C20 101.6(9) . . ? 
N13 C21 H21 112.2 . . ? 
N16 C21 H21 112.2 . . ? 
C20 C21 H21 112.2 . . ? 
O8 C22 N16 126.6(10) . . ? 
O8 C22 N15 125.7(11) . . ? 
N16 C22 N15 107.6(8) . . ? 
N17 C23 N14 113.6(9) . . ? 
N17 C23 H23A 108.9 . . ? 
N14 C23 H23A 108.9 . . ? 
N17 C23 H23B 108.9 . . ? 
N14 C23 H23B 108.9 . . ? 
H23A C23 H23B 107.7 . . ? 
N20 C24 N15 115.2(9) . . ? 
N20 C24 H24A 108.5 . . ? 
N15 C24 H24A 108.5 . . ? 
N20 C24 H24B 108.5 . . ? 
N15 C24 H24B 108.5 . . ? 
H24A C24 H24B 107.5 . . ? 
O9 C25 N18 125.9(10) . . ? 
O9 C25 N17 125.8(10) . . ? 
N18 C25 N17 108.2(10) . . ? 
N19 C26 N18 116.0(9) . . ? 
N19 C26 C27 102.5(8) . . ? 
N18 C26 C27 102.8(9) . . ? 
N19 C26 H26 111.6 . . ? 
N18 C26 H26 111.6 . . ? 
C27 C26 H26 111.6 . . ? 
N20 C27 N17 116.5(9) . . ? 
N20 C27 C26 104.8(8) . . ? 
N17 C27 C26 102.7(8) . . ? 
N20 C27 H27 110.8 . . ? 
N17 C27 H27 110.8 . . ? 
C26 C27 H27 110.8 . . ? 
O10 C28 N19 126.6(10) . . ? 
O10 C28 N20 124.4(10) . . ? 
N19 C28 N20 108.9(10) . . ? 
N1 C29 N18 115.9(9) . . ? 
N1 C29 H29A 108.3 . . ? 
N18 C29 H29A 108.3 . . ? 
N1 C29 H29B 108.3 . . ? 
N18 C29 H29B 108.3 . . ? 
H29A C29 H29B 107.4 . . ? 
N4 C30 N19 113.3(9) . . ? 
N4 C30 H30C 108.9 . . ? 
N19 C30 H30C 108.9 . . ? 
N4 C30 H30D 108.9 . . ? 
N19 C30 H30D 108.9 . . ? 
H30C C30 H30D 107.7 . . ? 
 
loop_ 
 _geom_hbond_atom_site_label_D 
 _geom_hbond_atom_site_label_H 
 _geom_hbond_atom_site_label_A 
 _geom_hbond_distance_DH 
 _geom_hbond_distance_HA 
 _geom_hbond_distance_DA 
 _geom_hbond_angle_DHA 
 _geom_hbond_site_symmetry_A 
O14 H14A O17  0.82 2.15 2.818(11) 138.9 3_465  
O14 H14B O30  0.88 1.87 2.645(12) 147 . 
O15 H15A O4  0.94 1.85 2.778(11) 170 3_465 
O15 H15B O21  0.90 2.30 3.096(11) 148 4_554 
O16 H16A O25  0.90 2.01 2.786(12) 144 4_544 
O16 H16B O27  0.87 1.91 2.64(2) 141 3_455 
O17 H17A O2  0.82 2.26 2.716(10) 115 . 
O17 H17B O23  0.86 2.15 3.000(13) 171 3_565 
O30 H30A O18  0.82 2.14 2.808(13) 138 . 
O30 H30B O28  0.80 2.14 2.82(2) 143 3_455 
O31 H31A O8  0.87 2.40 3.092(13) 138 3_465 
O31 H31B O24  0.95 1.93 2.770(18) 146 . 
O32 H32A O27  0.90 2.06 2.86(2) 149 4_655 

#===END

data_3
 
_audit_creation_method            SHELXL-97 
_chemical_name_systematic         ?
_chemical_name_common             ? 
_chemical_melting_point           ? 
_chemical_formula_moiety          ? 
_chemical_formula_sum             'C108 H132 K2 N74 O78 Re6 Sm2' 
_chemical_formula_weight          5210.98 
 
loop_ 
 _atom_type_symbol 
 _atom_type_description 
 _atom_type_scat_dispersion_real 
 _atom_type_scat_dispersion_imag 
 _atom_type_scat_source 
 'C'  'C'   0.0033   0.0016 
 'International Tables Vol C Tables 4.2.6.8 and 6.1.1.4' 
 'H'  'H'   0.0000   0.0000 
 'International Tables Vol C Tables 4.2.6.8 and 6.1.1.4' 
 'N'  'N'   0.0061   0.0033 
 'International Tables Vol C Tables 4.2.6.8 and 6.1.1.4' 
 'O'  'O'   0.0106   0.0060 
 'International Tables Vol C Tables 4.2.6.8 and 6.1.1.4' 
 'K'  'K'   0.2009   0.2494 
 'International Tables Vol C Tables 4.2.6.8 and 6.1.1.4' 
 'Sm'  'Sm'  -0.1638   3.4418 
 'International Tables Vol C Tables 4.2.6.8 and 6.1.1.4' 
 'Re'  'Re'  -1.0185   7.2310 
 'International Tables Vol C Tables 4.2.6.8 and 6.1.1.4' 
 
_symmetry_cell_setting            orthorhombic
_symmetry_space_group_name_H-M    'P c c n'
 
loop_ 
 _symmetry_equiv_pos_as_xyz 
 'x, y, z' 
 '-x+1/2, -y+1/2, z' 
 '-x, y+1/2, -z+1/2' 
 'x+1/2, -y, -z+1/2' 
 '-x, -y, -z' 
 'x-1/2, y-1/2, -z' 
 'x, -y-1/2, z-1/2' 
 '-x-1/2, y, z-1/2' 
 
_cell_length_a                    22.1502(9) 
_cell_length_b                    36.173(2) 
_cell_length_c                    20.0440(12) 
_cell_angle_alpha                 90.00 
_cell_angle_beta                  90.00 
_cell_angle_gamma                 90.00 
_cell_volume                      16060.0(15) 
_cell_formula_units_Z             4 
_cell_measurement_temperature     100(2) 
_cell_measurement_reflns_used     209326
_cell_measurement_theta_min       2.99
_cell_measurement_theta_max       25.68
 
_exptl_crystal_description        platelet
_exptl_crystal_colour             colourless
_exptl_crystal_size_max           0.17
_exptl_crystal_size_mid           0.15
_exptl_crystal_size_min           0.07
_exptl_crystal_density_meas       ? 
_exptl_crystal_density_diffrn     2.155 
_exptl_crystal_density_method     'not measured' 
_exptl_crystal_F_000              10136 
_exptl_absorpt_coefficient_mu     5.400 
_exptl_absorpt_correction_type    'multi-scan'
_exptl_absorpt_correction_T_min   0.466
_exptl_absorpt_correction_T_max   0.685
_exptl_absorpt_process_details    
'SCALEPACK (Otwinowski & Minor, 1997)'  
_exptl_special_details
'crystal-to-detector distance 40 mm'
_diffrn_ambient_temperature       100(2)
_diffrn_radiation_wavelength      0.71073 
_diffrn_radiation_type            MoK\a 
_diffrn_radiation_source          'fine-focus sealed tube' 
_diffrn_radiation_monochromator   graphite 
_diffrn_measurement_device_type   
'Nonius Kappa-CCD area-detector diffractometer'  
_diffrn_measurement_method        
'two \f and three \w scans with 2\% steps (289 frames)' 
_diffrn_standards_interval_time   0
_diffrn_standards_number          0
_diffrn_standards_decay_%         0
_diffrn_reflns_number             209326
_diffrn_reflns_av_R_equivalents   0.0785 
_diffrn_reflns_av_sigmaI/netI     0.1232 
_diffrn_reflns_limit_h_min        -26 
_diffrn_reflns_limit_h_max        27 
_diffrn_reflns_limit_k_min        -44 
_diffrn_reflns_limit_k_max        44 
_diffrn_reflns_limit_l_min        -24 
_diffrn_reflns_limit_l_max        24 
_diffrn_reflns_theta_min          2.99 
_diffrn_reflns_theta_max          25.68 
_reflns_number_total              15021 
_reflns_number_gt                 8338 
_reflns_threshold_expression      >2sigma(I) 
 
_computing_data_collection        'COLLECT (Nonius, 1998)'
_computing_cell_refinement        'HKL2000 (Otwinowski & Minor, 1997)'
_computing_data_reduction         'HKL2000 (Otwinowski & Minor, 1997)'
_computing_structure_solution     'SHELXS-97 (Sheldrick, 2008)' 
_computing_structure_refinement   'SHELXL-97 (Sheldrick, 2008)' 
_computing_molecular_graphics     'SHELXTL (Sheldrick, 2008)' 
_computing_publication_material   
'SHELXTL (Sheldrick, 2008); PLATON (Spek, 2003)' 
 
_refine_special_details 
;
 Structure solved by direct methods and subsequent Fourier-difference
 synthesis. All non-hydrogen atoms were refined with anisotropic
 displacement parameters, with restraints for some badly behaving atoms
 in the nitrate and perrhenate ions and the water molecules. The H atoms 
 bound to some O atoms (O18, O19, O39) were found on a Fourier-difference 
 map, but not those of the other O atoms. The C-bound H atoms were 
 introduced at calculated positions. All were treated as riding atoms with 
 an isotropic displacement parameter equal to 1.2 times that of the 
 parent atom. Large voids in the lattice likely indicate the presence of 
 other, unresolved solvent water molecules.
 Refinement of F^2^ against ALL reflections.  The weighted R-factor wR and 
 goodness of fit S are based on F^2^, conventional R-factors R are based 
 on F, with F set to zero for negative F^2^. The threshold expression of 
 F^2^ > 2sigma(F^2^) is used only for calculating R-factors(gt) etc. and is 
 not relevant to the choice of reflections for refinement.  R-factors based 
 on F^2^ are statistically about twice as large as those based on F, and R- 
 factors based on ALL data will be even larger. 
;
_refine_ls_structure_factor_coef  Fsqd  
_refine_ls_matrix_type            full 
_refine_ls_weighting_scheme       calc  
_refine_ls_weighting_details 
 'calc w=1/[\s^2^(Fo^2^)+(0.0712P)^2^] where P=(Fo^2^+2Fc^2^)/3' 
_atom_sites_solution_primary      direct 
_atom_sites_solution_secondary    difmap 
_atom_sites_solution_hydrogens    geom 
_refine_ls_hydrogen_treatment     constr 
_refine_ls_extinction_method      none 
_refine_ls_extinction_coef        ? 
_refine_ls_number_reflns          15021 
_refine_ls_number_parameters      1216
_refine_ls_number_restraints      66 
_refine_ls_R_factor_all           0.1204 
_refine_ls_R_factor_gt            0.0591 
_refine_ls_wR_factor_ref          0.1466 
_refine_ls_wR_factor_gt           0.1328 
_refine_ls_goodness_of_fit_ref    0.998 
_refine_ls_restrained_S_all       1.006 
_refine_ls_shift/su_max           0.001 
_refine_ls_shift/su_mean          0.000 
_diffrn_measured_fraction_theta_max    0.984 
_diffrn_reflns_theta_full              25.68 
_diffrn_measured_fraction_theta_full   0.984 
_refine_diff_density_max    1.625 
_refine_diff_density_min   -2.708 
_refine_diff_density_rms    0.202 
 
loop_ 
 _atom_site_label 
 _atom_site_type_symbol 
 _atom_site_fract_x 
 _atom_site_fract_y 
 _atom_site_fract_z 
 _atom_site_U_iso_or_equiv 
 _atom_site_adp_type 
 _atom_site_occupancy 
 _atom_site_symmetry_multiplicity 
 _atom_site_calc_flag 
 _atom_site_refinement_flags 
 _atom_site_disorder_assembly 
 _atom_site_disorder_group 
Sm Sm 0.11372(3) 0.372063(15) 0.84525(3) 0.02822(16) Uani 1 1 d . . . 
K K -0.08807(13) 0.26716(7) 0.64678(13) 0.0433(7) Uani 1 1 d . . . 
Re1 Re 0.29129(2) 0.354493(12) 0.89029(2) 0.02989(14) Uani 1 1 d . . . 
Re2 Re 0.47697(2) 0.468462(12) 0.91936(2) 0.02705(14) Uani 1 1 d . . . 
Re3 Re 0.65318(3) 0.356422(18) 0.88632(3) 0.0651(2) Uani 1 1 d . . . 
O1 O 0.1826(3) 0.3216(2) 0.7906(4) 0.0384(19) Uani 1 1 d . . . 
O2 O 0.0200(3) 0.2290(2) 0.6249(3) 0.0328(18) Uani 1 1 d . . . 
O3 O 0.1446(3) 0.3886(2) 0.7255(4) 0.0306(18) Uani 1 1 d . . . 
O4 O -0.0242(3) 0.3009(2) 0.5511(4) 0.0367(19) Uani 1 1 d . . . 
O5 O 0.0424(4) 0.4180(2) 0.8000(4) 0.0360(19) Uani 1 1 d . . . 
O6 O -0.1397(3) 0.3370(2) 0.6356(4) 0.037(2) Uani 1 1 d . . . 
O7 O 0.0203(4) 0.3722(2) 0.9099(4) 0.0364(19) Uani 1 1 d . . . 
O8 O -0.1597(3) 0.2854(2) 0.7565(4) 0.045(2) Uani 1 1 d . . . 
O9 O 0.1092(3) 0.3127(2) 0.9115(3) 0.0316(18) Uani 1 1 d . . . 
O10 O -0.0607(3) 0.2203(2) 0.7502(4) 0.037(2) Uani 1 1 d . . . 
O11 O 0.0540(6) 0.3297(3) 0.7754(6) 0.037(3) Uani 1 1 d U . . 
O12 O 0.0170(9) 0.2933(5) 0.7139(9) 0.065(5) Uani 1 1 d U . . 
O13 O -0.0300(7) 0.3376(5) 0.7527(9) 0.057(5) Uani 1 1 d U . . 
O14 O 0.2204(3) 0.3743(2) 0.8790(3) 0.0303(18) Uani 1 1 d . . . 
O15 O 0.3396(3) 0.3863(2) 0.9229(4) 0.040(2) Uani 1 1 d . . . 
O16 O 0.3208(3) 0.3409(2) 0.8138(3) 0.0385(19) Uani 1 1 d . . . 
O17 O 0.2882(4) 0.3166(2) 0.9413(4) 0.044(2) Uani 1 1 d . . . 
O18 O 0.1552(4) 0.4335(2) 0.8460(4) 0.048(2) Uani 1 1 d . . . 
H18A H 0.1389 0.4536 0.8323 0.058 Uiso 1 1 d R . . 
H18B H 0.1894 0.4339 0.8689 0.058 Uiso 1 1 d R . . 
O19 O 0.1262(3) 0.3896(2) 0.9617(4) 0.040(2) Uani 1 1 d . . . 
H19A H 0.1624 0.3992 0.9751 0.048 Uiso 1 1 d R . . 
H19B H 0.1079 0.3780 0.9975 0.048 Uiso 1 1 d R . . 
O20 O -0.1508(6) 0.2273(4) 0.5554(6) 0.072(4) Uani 1 1 d U . . 
O21 O -0.1987(7) 0.2769(4) 0.6534(6) 0.081(5) Uani 1 1 d U . . 
O22 O 0.4619(3) 0.42981(19) 0.8718(4) 0.0346(19) Uani 1 1 d . . . 
O23 O 0.5454(3) 0.48731(19) 0.8942(3) 0.0299(17) Uani 1 1 d . . . 
O24 O 0.4804(3) 0.4546(2) 1.0024(3) 0.039(2) Uani 1 1 d . . . 
O25 O 0.4176(3) 0.49982(19) 0.9115(3) 0.0327(18) Uani 1 1 d . . . 
O26 O 0.5861(5) 0.3343(3) 0.8756(5) 0.088(3) Uani 1 1 d U . . 
O27 O 0.6684(5) 0.3877(3) 0.8274(5) 0.092(3) Uani 1 1 d U . . 
O28 O 0.7134(6) 0.3229(4) 0.8880(7) 0.122(5) Uani 1 1 d U . . 
O29 O 0.6529(5) 0.3767(3) 0.9622(5) 0.095(4) Uani 1 1 d U . . 
O30 O 0.1493(3) 0.49913(19) 0.7822(3) 0.0309(18) Uani 1 1 d . . . 
O31 O 0.1159(3) 0.6316(2) 0.9748(4) 0.0367(19) Uani 1 1 d . . . 
O32 O 0.2578(3) 0.4565(2) 0.9114(3) 0.0325(18) Uani 1 1 d . . . 
O33 O 0.2265(3) 0.5863(2) 1.0947(4) 0.037(2) Uani 1 1 d . . . 
O34 O 0.2320(3) 0.3939(2) 1.0364(3) 0.0308(18) Uani 1 1 d . . . 
O35 O 0.1873(3) 0.5282(2) 1.2071(3) 0.0347(19) Uani 1 1 d . . . 
O36 O 0.0699(4) 0.3586(2) 1.0795(4) 0.039(2) Uani 1 1 d . . . 
O37 O 0.0354(3) 0.4958(2) 1.2548(4) 0.039(2) Uani 1 1 d . . . 
O38 O 0.1831(5) 0.3023(3) 1.0442(5) 0.084(3) Uani 1 1 d U . . 
O39 O 0.4683(4) 0.3549(2) 0.9187(4) 0.060(3) Uani 1 1 d . . . 
H39A H 0.4650 0.3812 0.9098 0.073 Uiso 1 1 d R . . 
H39B H 0.5098 0.3518 0.9328 0.073 Uiso 1 1 d R . . 
N1 N 0.1630(4) 0.2604(2) 0.7716(4) 0.024(2) Uani 1 1 d . . . 
N2 N 0.1856(4) 0.2954(2) 0.6854(4) 0.028(2) Uani 1 1 d . . . 
N3 N 0.1099(4) 0.2607(2) 0.6215(4) 0.028(2) Uani 1 1 d . . . 
N4 N 0.0972(4) 0.2214(2) 0.7038(4) 0.027(2) Uani 1 1 d . . . 
N5 N 0.1428(4) 0.3504(2) 0.6324(4) 0.033(2) Uani 1 1 d . . . 
N6 N 0.0830(4) 0.3990(2) 0.6332(4) 0.031(2) Uani 1 1 d . . . 
N7 N 0.0102(5) 0.3604(2) 0.5768(5) 0.038(2) Uani 1 1 d . . . 
N8 N 0.0768(4) 0.3154(3) 0.5593(4) 0.038(2) Uani 1 1 d . . . 
N9 N -0.0024(4) 0.4198(2) 0.6965(4) 0.030(2) Uani 1 1 d . . . 
N10 N -0.0609(4) 0.4155(2) 0.7853(4) 0.028(2) Uani 1 1 d . . . 
N11 N -0.1359(4) 0.3831(3) 0.7176(5) 0.043(3) Uani 1 1 d . . . 
N12 N -0.0786(4) 0.3887(2) 0.6273(4) 0.027(2) Uani 1 1 d . . . 
N13 N -0.0785(4) 0.3766(2) 0.8799(4) 0.029(2) Uani 1 1 d . . . 
N14 N -0.0464(4) 0.3248(2) 0.9247(4) 0.029(2) Uani 1 1 d . . . 
N15 N -0.1251(4) 0.2893(3) 0.8645(4) 0.034(2) Uani 1 1 d . . . 
N16 N -0.1507(4) 0.3415(3) 0.8124(4) 0.035(2) Uani 1 1 d . . . 
N17 N 0.0260(4) 0.2756(2) 0.9307(5) 0.034(2) Uani 1 1 d . . . 
N18 N 0.1017(4) 0.2525(2) 0.8707(4) 0.028(2) Uani 1 1 d . . . 
N19 N 0.0302(4) 0.2171(2) 0.8014(4) 0.033(2) Uani 1 1 d . . . 
N20 N -0.0444(4) 0.2441(3) 0.8549(5) 0.036(2) Uani 1 1 d . . . 
N21 N 0.0112(6) 0.3202(4) 0.7468(7) 0.033(4) Uani 1 1 d U . . 
N22 N 0.1103(4) 0.5587(2) 0.7913(4) 0.023(2) Uani 1 1 d . . . 
N23 N 0.1991(4) 0.5466(2) 0.8389(4) 0.028(2) Uani 1 1 d . . . 
N24 N 0.1847(4) 0.5990(2) 0.9133(4) 0.034(2) Uani 1 1 d . . . 
N25 N 0.0952(4) 0.6100(3) 0.8689(4) 0.031(2) Uani 1 1 d . . . 
N26 N 0.2727(4) 0.5197(2) 0.9156(4) 0.030(2) Uani 1 1 d . . . 
N27 N 0.2994(3) 0.4856(2) 1.0017(4) 0.026(2) Uani 1 1 d . . . 
N28 N 0.2949(4) 0.5400(2) 1.0742(4) 0.029(2) Uani 1 1 d . . . 
N29 N 0.2574(4) 0.5709(2) 0.9886(4) 0.032(2) Uani 1 1 d . . . 
N30 N 0.2851(4) 0.4400(2) 1.0907(4) 0.024(2) Uani 1 1 d . . . 
N31 N 0.2121(4) 0.4113(2) 1.1455(4) 0.030(2) Uani 1 1 d . . . 
N32 N 0.1989(4) 0.4654(3) 1.2200(4) 0.034(2) Uani 1 1 d . . . 
N33 N 0.2647(4) 0.4952(2) 1.1562(4) 0.028(2) Uani 1 1 d . . . 
N34 N 0.1098(4) 0.3893(2) 1.1715(4) 0.026(2) Uani 1 1 d . . . 
N35 N 0.0099(4) 0.3832(2) 1.1632(4) 0.029(2) Uani 1 1 d . . . 
N36 N -0.0035(4) 0.4384(3) 1.2296(4) 0.031(2) Uani 1 1 d . . . 
N37 N 0.0955(4) 0.4443(3) 1.2389(4) 0.030(2) Uani 1 1 d . . . 
C1 C 0.1763(5) 0.2949(3) 0.7516(6) 0.035(3) Uani 1 1 d . . . 
C2 C 0.1673(5) 0.2609(3) 0.6554(5) 0.033(3) Uani 1 1 d . . . 
H2 H 0.1991 0.2512 0.6264 0.040 Uiso 1 1 calc R . . 
C3 C 0.1576(5) 0.2351(3) 0.7166(5) 0.032(3) Uani 1 1 d . . . 
H3 H 0.1875 0.2152 0.7186 0.038 Uiso 1 1 calc R . . 
C4 C 0.0686(6) 0.2369(3) 0.6474(6) 0.033(3) Uani 1 1 d . . . 
C5 C 0.1969(5) 0.3295(3) 0.6502(5) 0.034(3) Uani 1 1 d . . . 
H5A H 0.2191 0.3239 0.6097 0.040 Uiso 1 1 calc R . . 
H5B H 0.2225 0.3451 0.6777 0.040 Uiso 1 1 calc R . . 
C6 C 0.1002(5) 0.2788(3) 0.5552(5) 0.034(3) Uani 1 1 d . . . 
H6A H 0.1384 0.2794 0.5315 0.041 Uiso 1 1 calc R . . 
H6B H 0.0725 0.2637 0.5293 0.041 Uiso 1 1 calc R . . 
C7 C 0.1255(5) 0.3799(3) 0.6722(7) 0.039(3) Uani 1 1 d . . . 
C8 C 0.0674(5) 0.3796(3) 0.5723(6) 0.035(3) Uani 1 1 d . . . 
H8 H 0.0693 0.3958 0.5332 0.041 Uiso 1 1 calc R . . 
C9 C 0.1139(5) 0.3481(3) 0.5683(6) 0.032(3) Uani 1 1 d . . . 
H9 H 0.1425 0.3516 0.5315 0.038 Uiso 1 1 calc R . . 
C10 C 0.0158(6) 0.3231(3) 0.5612(5) 0.035(3) Uani 1 1 d . . . 
C11 C 0.0515(5) 0.4297(3) 0.6601(5) 0.029(3) Uani 1 1 d . . . 
H11A H 0.0404 0.4462 0.6239 0.035 Uiso 1 1 calc R . . 
H11B H 0.0783 0.4431 0.6897 0.035 Uiso 1 1 calc R . . 
C12 C -0.0489(5) 0.3787(3) 0.5660(5) 0.040(3) Uani 1 1 d . . . 
H12A H -0.0429 0.4007 0.5393 0.048 Uiso 1 1 calc R . . 
H12B H -0.0750 0.3621 0.5410 0.048 Uiso 1 1 calc R . . 
C13 C -0.0037(7) 0.4170(3) 0.7654(6) 0.036(3) Uani 1 1 d . . . 
C14 C -0.1035(5) 0.4168(3) 0.7310(6) 0.035(3) Uani 1 1 d . . . 
H14 H -0.1313 0.4376 0.7360 0.042 Uiso 1 1 calc R . . 
C15 C -0.0641(5) 0.4211(3) 0.6674(6) 0.036(3) Uani 1 1 d . . . 
H15 H -0.0720 0.4443 0.6438 0.044 Uiso 1 1 calc R . . 
C16 C -0.1181(5) 0.3660(4) 0.6588(6) 0.038(3) Uani 1 1 d . . . 
C17 C -0.0783(5) 0.4136(3) 0.8543(5) 0.031(3) Uani 1 1 d . . . 
H17A H -0.0507 0.4284 0.8805 0.037 Uiso 1 1 calc R . . 
H17B H -0.1184 0.4241 0.8593 0.037 Uiso 1 1 calc R . . 
C18 C -0.1795(5) 0.3651(3) 0.7658(6) 0.037(3) Uani 1 1 d . . . 
H18C H -0.2011 0.3842 0.7899 0.044 Uiso 1 1 calc R . . 
H18D H -0.2089 0.3509 0.7407 0.044 Uiso 1 1 calc R . . 
C19 C -0.0305(6) 0.3592(3) 0.9055(5) 0.035(3) Uani 1 1 d . . . 
C20 C -0.1100(5) 0.3175(3) 0.9132(5) 0.034(3) Uani 1 1 d . . . 
H20 H -0.1313 0.3133 0.9554 0.041 Uiso 1 1 calc R . . 
C21 C -0.1330(5) 0.3533(3) 0.8781(5) 0.038(3) Uani 1 1 d . . . 
H21 H -0.1667 0.3646 0.9023 0.046 Uiso 1 1 calc R . . 
C22 C -0.1460(6) 0.3037(4) 0.8064(6) 0.045(3) Uani 1 1 d . . . 
C23 C -0.0084(5) 0.3026(3) 0.9668(5) 0.032(3) Uani 1 1 d . . . 
H23A H 0.0191 0.3187 0.9908 0.038 Uiso 1 1 calc R . . 
H23B H -0.0334 0.2901 0.9995 0.038 Uiso 1 1 calc R . . 
C24 C -0.1083(5) 0.2519(3) 0.8706(5) 0.035(3) Uani 1 1 d . . . 
H24A H -0.1335 0.2373 0.8411 0.042 Uiso 1 1 calc R . . 
H24B H -0.1164 0.2439 0.9159 0.042 Uiso 1 1 calc R . . 
C25 C 0.0813(6) 0.2828(3) 0.9033(5) 0.032(3) Uani 1 1 d . . . 
C26 C 0.0569(5) 0.2238(3) 0.8685(5) 0.036(3) Uani 1 1 d . . . 
H26 H 0.0712 0.2009 0.8892 0.043 Uiso 1 1 calc R . . 
C27 C 0.0023(5) 0.2407(3) 0.9072(6) 0.033(3) Uani 1 1 d . . . 
H27 H -0.0109 0.2249 0.9440 0.040 Uiso 1 1 calc R . . 
C28 C -0.0285(6) 0.2267(3) 0.7970(7) 0.038(3) Uani 1 1 d . . . 
C29 C 0.1600(5) 0.2505(3) 0.8416(5) 0.036(3) Uani 1 1 d . . . 
H29A H 0.1750 0.2255 0.8467 0.044 Uiso 1 1 calc R . . 
H29B H 0.1867 0.2668 0.8663 0.044 Uiso 1 1 calc R . . 
C30 C 0.0613(5) 0.1979(3) 0.7488(5) 0.038(3) Uani 1 1 d . . . 
H30A H 0.0318 0.1846 0.7224 0.046 Uiso 1 1 calc R . . 
H30B H 0.0880 0.1798 0.7689 0.046 Uiso 1 1 calc R . . 
C31 C 0.1522(5) 0.5314(3) 0.8045(5) 0.025(2) Uani 1 1 d . . . 
C32 C 0.1918(5) 0.5864(3) 0.8454(5) 0.031(3) Uani 1 1 d . . . 
H32 H 0.2241 0.5998 0.8223 0.037 Uiso 1 1 calc R . . 
C33 C 0.1293(5) 0.5948(3) 0.8146(5) 0.029(3) Uani 1 1 d . . . 
H33 H 0.1326 0.6124 0.7777 0.034 Uiso 1 1 calc R . . 
C34 C 0.1301(5) 0.6149(3) 0.9253(6) 0.026(3) Uani 1 1 d . . . 
C35 C 0.2567(5) 0.5276(3) 0.8470(5) 0.035(3) Uani 1 1 d . . . 
H35A H 0.2553 0.5045 0.8225 0.041 Uiso 1 1 calc R . . 
H35B H 0.2882 0.5427 0.8274 0.041 Uiso 1 1 calc R . . 
C36 C 0.2376(4) 0.6052(3) 0.9580(5) 0.028(3) Uani 1 1 d . . . 
H36A H 0.2706 0.6157 0.9324 0.034 Uiso 1 1 calc R . . 
H36B H 0.2267 0.6227 0.9926 0.034 Uiso 1 1 calc R . . 
C37 C 0.2747(5) 0.4844(3) 0.9387(5) 0.029(3) Uani 1 1 d . . . 
C38 C 0.3223(5) 0.5223(3) 1.0178(5) 0.029(3) Uani 1 1 d . . . 
H38 H 0.3664 0.5223 1.0215 0.035 Uiso 1 1 calc R . . 
C39 C 0.3011(5) 0.5462(3) 0.9585(5) 0.029(3) Uani 1 1 d . . . 
H39 H 0.3343 0.5594 0.9367 0.035 Uiso 1 1 calc R . . 
C40 C 0.2564(5) 0.5672(3) 1.0561(5) 0.028(3) Uani 1 1 d . . . 
C41 C 0.3219(5) 0.4527(3) 1.0338(5) 0.032(3) Uani 1 1 d . . . 
H41A H 0.3626 0.4574 1.0493 0.038 Uiso 1 1 calc R . . 
H41B H 0.3239 0.4330 1.0010 0.038 Uiso 1 1 calc R . . 
C42 C 0.3009(5) 0.5263(3) 1.1418(5) 0.037(3) Uani 1 1 d . . . 
H42A H 0.3428 0.5199 1.1496 0.044 Uiso 1 1 calc R . . 
H42B H 0.2904 0.5460 1.1725 0.044 Uiso 1 1 calc R . . 
C43 C 0.2417(5) 0.4135(3) 1.0837(5) 0.032(3) Uani 1 1 d . . . 
C44 C 0.2392(5) 0.4357(3) 1.1959(6) 0.035(3) Uani 1 1 d . . . 
H44 H 0.2576 0.4218 1.2326 0.042 Uiso 1 1 calc R . . 
C45 C 0.2861(5) 0.4572(3) 1.1552(5) 0.031(3) Uani 1 1 d . . . 
H45 H 0.3262 0.4553 1.1756 0.037 Uiso 1 1 calc R . . 
C46 C 0.2141(6) 0.4989(3) 1.1949(5) 0.036(3) Uani 1 1 d . . . 
C47 C 0.1718(5) 0.3802(3) 1.1632(5) 0.030(3) Uani 1 1 d . . . 
H47A H 0.1749 0.3615 1.1286 0.035 Uiso 1 1 calc R . . 
H47B H 0.1863 0.3692 1.2043 0.035 Uiso 1 1 calc R . . 
C48 C 0.1507(5) 0.4596(3) 1.2676(5) 0.030(3) Uani 1 1 d . . . 
H48A H 0.1412 0.4830 1.2887 0.036 Uiso 1 1 calc R . . 
H48B H 0.1650 0.4429 1.3022 0.036 Uiso 1 1 calc R . . 
C49 C 0.0637(6) 0.3757(3) 1.1329(6) 0.039(3) Uani 1 1 d . . . 
C50 C 0.0181(4) 0.4008(3) 1.2276(5) 0.031(3) Uani 1 1 d . . . 
H50 H 0.0017 0.3859 1.2642 0.037 Uiso 1 1 calc R . . 
C51 C 0.0868(5) 0.4055(3) 1.2327(5) 0.027(3) Uani 1 1 d . . . 
H51 H 0.1027 0.3924 1.2718 0.032 Uiso 1 1 calc R . . 
C52 C 0.0414(5) 0.4638(3) 1.2423(5) 0.028(3) Uani 1 1 d . . . 
C53 C -0.0477(5) 0.3650(3) 1.1444(6) 0.036(3) Uani 1 1 d . . . 
H53A H -0.0409 0.3499 1.1051 0.044 Uiso 1 1 calc R . . 
H53B H -0.0599 0.3487 1.1804 0.044 Uiso 1 1 calc R . . 
C54 C -0.0644(5) 0.4455(3) 1.2568(5) 0.029(3) Uani 1 1 d . . . 
H54A H -0.0718 0.4287 1.2935 0.035 Uiso 1 1 calc R . . 
H54B H -0.0658 0.4705 1.2743 0.035 Uiso 1 1 calc R . . 
 
loop_ 
 _atom_site_aniso_label 
 _atom_site_aniso_U_11 
 _atom_site_aniso_U_22 
 _atom_site_aniso_U_33 
 _atom_site_aniso_U_23 
 _atom_site_aniso_U_13 
 _atom_site_aniso_U_12 
Sm 0.0375(4) 0.0209(3) 0.0263(3) -0.0009(3) -0.0036(3) -0.0012(3) 
K 0.0579(18) 0.0353(16) 0.0368(16) -0.0007(12) 0.0011(13) 0.0043(13) 
Re1 0.0403(3) 0.0218(3) 0.0276(3) -0.0032(2) -0.0012(2) 0.0029(2) 
Re2 0.0369(3) 0.0216(2) 0.0226(3) 0.00106(19) 0.0013(2) 0.0010(2) 
Re3 0.0753(5) 0.0531(4) 0.0669(4) -0.0053(3) -0.0005(4) -0.0162(3) 
O1 0.043(5) 0.036(5) 0.036(5) -0.002(4) 0.004(4) -0.003(4) 
O2 0.041(5) 0.024(4) 0.034(4) -0.001(3) -0.012(4) -0.001(4) 
O3 0.042(5) 0.031(5) 0.018(4) -0.001(3) -0.007(4) -0.005(4) 
O4 0.046(5) 0.030(5) 0.034(5) 0.000(4) -0.006(4) -0.014(4) 
O5 0.045(5) 0.030(5) 0.032(5) -0.004(4) -0.007(4) 0.001(4) 
O6 0.043(5) 0.032(5) 0.037(5) -0.004(4) -0.008(4) 0.009(4) 
O7 0.051(6) 0.029(5) 0.030(4) 0.000(4) -0.007(4) -0.001(4) 
O8 0.050(5) 0.042(5) 0.042(5) -0.014(4) -0.009(4) 0.002(4) 
O9 0.041(5) 0.022(4) 0.032(4) -0.001(3) -0.006(4) -0.001(4) 
O10 0.040(5) 0.033(5) 0.038(5) -0.001(4) -0.008(4) -0.013(4) 
O11 0.053(6) 0.027(5) 0.030(5) 0.001(4) 0.011(4) -0.001(4) 
O12 0.078(8) 0.057(8) 0.061(8) -0.016(7) 0.000(7) -0.001(7) 
O13 0.048(6) 0.061(6) 0.062(6) 0.011(5) -0.003(5) 0.014(5) 
O14 0.028(4) 0.034(5) 0.030(4) -0.004(3) -0.001(3) 0.008(3) 
O15 0.043(5) 0.031(5) 0.048(5) -0.003(4) 0.000(4) -0.001(4) 
O16 0.046(5) 0.036(5) 0.033(4) -0.003(4) 0.004(4) 0.005(4) 
O17 0.062(5) 0.023(5) 0.047(5) -0.008(4) -0.006(4) 0.010(4) 
O18 0.068(6) 0.022(5) 0.054(5) 0.006(4) -0.019(5) -0.003(4) 
O19 0.041(5) 0.049(5) 0.031(4) -0.002(4) 0.006(4) -0.011(4) 
O20 0.088(7) 0.074(7) 0.055(6) -0.021(6) 0.014(6) -0.022(6) 
O21 0.142(12) 0.058(9) 0.044(7) -0.003(7) 0.016(8) -0.038(9) 
O22 0.051(5) 0.013(4) 0.040(5) 0.007(3) 0.001(4) -0.005(3) 
O23 0.040(4) 0.022(4) 0.028(4) 0.002(3) 0.001(3) -0.004(3) 
O24 0.069(6) 0.030(5) 0.016(4) 0.011(3) 0.008(4) 0.006(4) 
O25 0.041(5) 0.024(4) 0.033(4) -0.006(3) 0.007(4) -0.002(3) 
O26 0.082(5) 0.082(5) 0.100(5) -0.019(4) -0.004(4) -0.009(4) 
O27 0.107(5) 0.091(5) 0.080(5) 0.007(4) -0.018(4) -0.009(4) 
O28 0.113(6) 0.114(6) 0.139(6) 0.004(5) 0.005(5) 0.010(4) 
O29 0.093(5) 0.108(5) 0.084(5) -0.009(4) 0.001(4) -0.020(4) 
O30 0.045(5) 0.015(4) 0.033(4) 0.000(3) 0.002(4) 0.004(3) 
O31 0.035(5) 0.044(5) 0.031(5) -0.014(4) 0.008(4) 0.001(4) 
O32 0.033(4) 0.031(5) 0.034(4) -0.005(4) -0.007(4) -0.004(4) 
O33 0.036(5) 0.039(5) 0.038(5) -0.005(4) 0.004(4) 0.011(4) 
O34 0.048(5) 0.030(5) 0.014(4) -0.007(3) 0.003(3) 0.005(4) 
O35 0.043(5) 0.033(5) 0.029(4) -0.005(4) 0.005(4) 0.012(4) 
O36 0.050(5) 0.036(5) 0.032(5) 0.002(4) -0.001(4) 0.001(4) 
O37 0.049(5) 0.026(5) 0.040(5) 0.000(4) 0.003(4) -0.003(4) 
O38 0.096(5) 0.073(5) 0.082(5) 0.014(4) -0.023(4) -0.011(4) 
O39 0.091(7) 0.024(5) 0.067(6) 0.008(4) 0.002(5) -0.011(5) 
N1 0.038(6) 0.013(5) 0.022(5) -0.002(4) -0.004(4) 0.001(4) 
N2 0.032(5) 0.024(5) 0.028(5) -0.005(4) 0.003(4) -0.002(4) 
N3 0.029(5) 0.028(5) 0.027(5) 0.003(4) -0.001(4) 0.003(4) 
N4 0.037(6) 0.026(5) 0.019(5) -0.005(4) -0.005(4) 0.001(4) 
N5 0.041(6) 0.028(6) 0.031(5) 0.003(4) 0.004(5) 0.002(5) 
N6 0.043(6) 0.024(6) 0.024(5) 0.005(4) 0.001(5) -0.012(5) 
N7 0.055(7) 0.024(6) 0.035(6) -0.001(4) -0.005(5) -0.001(5) 
N8 0.044(7) 0.038(7) 0.033(6) 0.004(5) -0.008(5) -0.001(5) 
N9 0.033(6) 0.026(5) 0.030(6) 0.005(4) -0.003(5) 0.002(4) 
N10 0.026(6) 0.037(6) 0.023(5) 0.006(4) 0.003(4) -0.001(4) 
N11 0.040(6) 0.037(7) 0.052(7) -0.004(5) -0.002(5) 0.008(5) 
N12 0.029(5) 0.024(5) 0.028(5) -0.003(4) 0.003(4) -0.004(4) 
N13 0.033(6) 0.020(5) 0.033(5) -0.002(4) 0.013(5) -0.001(4) 
N14 0.030(6) 0.027(6) 0.030(5) 0.000(4) 0.005(4) -0.007(4) 
N15 0.034(6) 0.037(6) 0.031(6) 0.002(5) -0.009(4) -0.005(5) 
N16 0.044(6) 0.031(6) 0.031(6) 0.008(5) -0.001(5) -0.002(5) 
N17 0.049(7) 0.015(5) 0.039(6) 0.007(4) -0.011(5) 0.006(5) 
N18 0.036(6) 0.019(5) 0.029(5) -0.003(4) -0.005(4) 0.005(4) 
N19 0.043(7) 0.020(5) 0.035(6) 0.005(4) 0.004(5) -0.001(4) 
N20 0.037(6) 0.033(6) 0.038(6) 0.002(5) -0.001(5) -0.004(5) 
N21 0.036(6) 0.028(5) 0.034(5) 0.009(4) 0.015(4) 0.023(4) 
N22 0.021(5) 0.022(5) 0.024(5) -0.011(4) 0.003(4) 0.008(4) 
N23 0.034(6) 0.024(5) 0.026(5) 0.002(4) 0.002(4) 0.000(4) 
N24 0.047(6) 0.026(5) 0.029(5) -0.010(4) 0.009(5) 0.000(5) 
N25 0.031(5) 0.030(6) 0.031(6) -0.005(4) -0.007(5) 0.012(4) 
N26 0.038(6) 0.027(6) 0.026(5) -0.004(4) -0.005(4) 0.000(4) 
N27 0.023(5) 0.017(5) 0.039(6) -0.003(4) -0.006(4) 0.006(4) 
N28 0.033(5) 0.027(5) 0.028(5) -0.009(4) 0.006(4) 0.006(4) 
N29 0.051(6) 0.022(5) 0.023(5) -0.001(4) -0.003(5) 0.006(5) 
N30 0.022(5) 0.022(5) 0.028(5) 0.001(4) 0.004(4) -0.006(4) 
N31 0.055(6) 0.022(5) 0.013(5) -0.006(4) -0.004(5) 0.004(5) 
N32 0.043(6) 0.028(6) 0.030(5) -0.012(4) 0.006(5) 0.008(5) 
N33 0.029(5) 0.015(5) 0.038(5) -0.006(4) -0.003(5) 0.008(4) 
N34 0.028(5) 0.033(6) 0.018(5) -0.006(4) -0.003(4) 0.000(4) 
N35 0.030(6) 0.035(6) 0.024(5) -0.015(4) -0.001(4) 0.001(4) 
N36 0.042(6) 0.038(6) 0.012(5) -0.004(4) 0.002(4) 0.017(5) 
N37 0.035(6) 0.033(6) 0.023(5) -0.003(4) -0.002(4) -0.001(5) 
C1 0.034(7) 0.034(8) 0.036(8) -0.011(6) -0.010(6) 0.008(6) 
C2 0.051(8) 0.015(6) 0.035(6) -0.004(5) -0.012(6) -0.002(5) 
C3 0.029(7) 0.019(6) 0.047(7) -0.003(5) 0.002(6) -0.002(5) 
C4 0.045(5) 0.023(4) 0.033(5) -0.004(4) 0.001(4) 0.007(4) 
C5 0.050(8) 0.020(7) 0.031(6) -0.012(5) 0.009(6) -0.006(6) 
C6 0.029(7) 0.034(7) 0.039(7) -0.006(6) -0.014(5) -0.003(5) 
C7 0.040(8) 0.030(8) 0.047(9) 0.003(6) 0.021(7) 0.002(6) 
C8 0.048(8) 0.022(7) 0.034(7) 0.009(5) 0.010(6) 0.006(6) 
C9 0.031(7) 0.017(6) 0.048(8) 0.002(5) 0.005(6) -0.006(5) 
C10 0.064(10) 0.034(8) 0.007(6) 0.003(5) -0.004(6) 0.000(7) 
C11 0.029(6) 0.031(7) 0.027(6) 0.005(5) 0.002(5) -0.006(5) 
C12 0.056(8) 0.036(8) 0.029(7) -0.008(6) -0.003(6) -0.002(6) 
C13 0.071(10) 0.010(6) 0.027(7) -0.003(5) 0.003(7) -0.008(6) 
C14 0.041(7) 0.019(7) 0.046(7) -0.007(5) 0.005(6) 0.004(5) 
C15 0.030(7) 0.032(7) 0.046(8) 0.006(6) 0.000(6) 0.005(5) 
C16 0.038(8) 0.047(9) 0.029(7) -0.012(6) 0.000(6) 0.019(7) 
C17 0.033(7) 0.045(8) 0.014(6) 0.002(5) -0.004(5) 0.002(5) 
C18 0.023(6) 0.050(8) 0.039(7) 0.008(6) 0.006(6) -0.003(6) 
C19 0.038(8) 0.040(8) 0.026(7) -0.009(5) -0.002(6) 0.002(7) 
C20 0.052(8) 0.030(7) 0.019(6) -0.004(5) 0.011(6) 0.007(6) 
C21 0.038(7) 0.049(8) 0.027(7) -0.004(6) 0.002(6) 0.008(6) 
C22 0.052(8) 0.043(9) 0.041(8) -0.003(7) 0.012(7) 0.003(7) 
C23 0.037(7) 0.024(6) 0.036(7) 0.009(5) 0.004(6) -0.003(5) 
C24 0.044(8) 0.038(8) 0.024(6) -0.001(5) 0.002(5) -0.005(6) 
C25 0.056(9) 0.024(7) 0.017(6) 0.013(5) -0.009(6) 0.003(6) 
C26 0.056(8) 0.029(7) 0.024(6) -0.003(5) 0.003(6) -0.007(6) 
C27 0.036(7) 0.022(7) 0.041(7) -0.001(5) -0.010(6) -0.009(5) 
C28 0.039(9) 0.027(7) 0.046(9) 0.012(6) 0.011(7) -0.006(6) 
C29 0.044(8) 0.020(6) 0.045(7) -0.011(6) -0.006(6) 0.008(5) 
C30 0.056(8) 0.018(7) 0.040(7) -0.005(6) -0.002(6) 0.006(6) 
C31 0.030(4) 0.029(4) 0.017(4) 0.007(4) 0.003(4) 0.001(4) 
C32 0.051(8) 0.020(6) 0.021(6) 0.006(5) 0.007(5) -0.002(5) 
C33 0.046(7) 0.025(7) 0.015(6) 0.010(5) -0.012(5) 0.011(5) 
C34 0.031(7) 0.014(6) 0.031(7) 0.008(5) -0.003(6) 0.006(5) 
C35 0.050(8) 0.034(7) 0.019(6) 0.002(5) 0.004(6) 0.013(6) 
C36 0.022(6) 0.026(7) 0.037(7) -0.005(5) 0.002(5) -0.002(5) 
C37 0.031(7) 0.028(7) 0.029(7) -0.001(5) -0.005(5) 0.001(5) 
C38 0.039(7) 0.016(6) 0.034(7) 0.000(5) -0.006(6) 0.011(5) 
C39 0.027(6) 0.030(7) 0.030(6) -0.005(5) -0.001(5) 0.005(5) 
C40 0.034(7) 0.013(6) 0.037(7) 0.002(5) -0.011(6) 0.003(5) 
C41 0.034(7) 0.018(6) 0.043(7) -0.005(5) 0.002(6) 0.004(5) 
C42 0.058(8) 0.037(8) 0.015(6) -0.010(5) 0.004(6) 0.005(6) 
C43 0.037(7) 0.034(7) 0.024(7) 0.016(6) 0.005(6) 0.013(6) 
C44 0.032(7) 0.031(7) 0.041(7) 0.006(6) -0.021(6) -0.001(5) 
C45 0.033(7) 0.037(7) 0.024(6) 0.001(5) 0.003(5) 0.007(5) 
C46 0.054(8) 0.018(7) 0.035(7) -0.007(5) -0.003(6) 0.003(6) 
C47 0.037(7) 0.023(6) 0.028(6) -0.003(5) 0.004(5) -0.001(5) 
C48 0.029(7) 0.028(7) 0.032(7) -0.015(5) 0.002(6) 0.009(5) 
C49 0.065(9) 0.024(7) 0.027(7) 0.003(6) -0.006(7) 0.003(6) 
C50 0.021(6) 0.046(8) 0.026(6) 0.009(5) 0.007(5) 0.013(5) 
C51 0.038(7) 0.013(6) 0.029(6) -0.005(5) -0.015(5) 0.003(5) 
C52 0.045(8) 0.028(7) 0.013(6) 0.003(5) -0.007(5) -0.009(6) 
C53 0.048(8) 0.027(7) 0.033(7) -0.006(5) 0.006(6) 0.001(6) 
C54 0.042(7) 0.027(7) 0.018(6) -0.005(5) -0.004(6) 0.005(5) 
 
_geom_special_details 
; 
 All esds (except the esd in the dihedral angle between two l.s. planes) 
 are estimated using the full covariance matrix.  The cell esds are taken 
 into account individually in the estimation of esds in distances, angles 
 and torsion angles; correlations between esds in cell parameters are only 
 used when they are defined by crystal symmetry.  An approximate (isotropic) 
 treatment of cell esds is used for estimating esds involving l.s. planes. 
;
loop_ 
 _geom_bond_atom_site_label_1 
 _geom_bond_atom_site_label_2 
 _geom_bond_distance 
 _geom_bond_site_symmetry_2 
 _geom_bond_publ_flag 
Sm O18 2.404(7) . ? 
Sm O19 2.434(7) . ? 
Sm O7 2.441(8) . ? 
Sm O14 2.459(7) . ? 
Sm O5 2.465(8) . ? 
Sm O11 2.462(12) . ? 
Sm O9 2.527(7) . ? 
Sm O3 2.567(7) . ? 
Sm O1 2.619(8) . ? 
K O21 2.480(17) . ? 
K O4 2.678(8) . ? 
K O20 2.714(13) . ? 
K O10 2.745(8) . ? 
K O6 2.782(8) . ? 
K O8 2.791(8) . ? 
K O2 2.798(8) . ? 
K O12 2.851(19) . ? 
Re1 O15 1.700(7) . ? 
Re1 O17 1.711(8) . ? 
Re1 O16 1.739(7) . ? 
Re1 O14 1.741(7) . ? 
Re2 O22 1.725(7) . ? 
Re2 O23 1.736(7) . ? 
Re2 O24 1.741(6) . ? 
Re2 O25 1.743(7) . ? 
Re3 O27 1.672(11) . ? 
Re3 O29 1.690(11) . ? 
Re3 O26 1.702(11) . ? 
Re3 O28 1.802(13) . ? 
O1 C1 1.250(12) . ? 
O2 C4 1.201(13) . ? 
O3 C7 1.192(14) . ? 
O4 C10 1.214(13) . ? 
O5 C13 1.235(14) . ? 
O6 C16 1.244(14) . ? 
O7 C19 1.225(13) . ? 
O8 C22 1.236(14) . ? 
O9 C25 1.256(13) . ? 
O10 C28 1.202(14) . ? 
O11 N21 1.160(10) . ? 
O12 N21 1.18(2) . ? 
O13 N21 1.12(2) . ? 
O18 H18A 0.8577 . ? 
O18 H18B 0.8857 . ? 
O19 H19A 0.9137 . ? 
O19 H19B 0.9255 . ? 
O30 C31 1.250(12) . ? 
O31 C34 1.204(12) . ? 
O32 C37 1.209(12) . ? 
O33 C40 1.232(12) . ? 
O34 C43 1.203(13) . ? 
O35 C46 1.238(12) . ? 
O36 C49 1.243(13) . ? 
O37 C52 1.191(13) . ? 
O39 H39A 0.9707 . ? 
O39 H39B 0.9686 . ? 
N1 C1 1.342(14) . ? 
N1 C3 1.439(12) . ? 
N1 C29 1.450(13) . ? 
N2 C1 1.343(13) . ? 
N2 C2 1.443(12) . ? 
N2 C5 1.446(13) . ? 
N3 C4 1.359(14) . ? 
N3 C2 1.441(13) . ? 
N3 C6 1.495(13) . ? 
N4 C4 1.412(13) . ? 
N4 C3 1.448(13) . ? 
N4 C30 1.475(13) . ? 
N5 C7 1.388(14) . ? 
N5 C9 1.437(14) . ? 
N5 C5 1.461(14) . ? 
N6 C7 1.404(15) . ? 
N6 C11 1.418(13) . ? 
N6 C8 1.449(14) . ? 
N7 C10 1.389(14) . ? 
N7 C8 1.449(14) . ? 
N7 C12 1.482(15) . ? 
N8 C10 1.379(15) . ? 
N8 C6 1.427(14) . ? 
N8 C9 1.451(13) . ? 
N9 C13 1.386(14) . ? 
N9 C11 1.444(13) . ? 
N9 C15 1.485(14) . ? 
N10 C13 1.329(15) . ? 
N10 C17 1.438(12) . ? 
N10 C14 1.441(14) . ? 
N11 C16 1.387(14) . ? 
N11 C14 1.439(14) . ? 
N11 C18 1.514(14) . ? 
N12 C16 1.357(14) . ? 
N12 C12 1.439(13) . ? 
N12 C15 1.457(14) . ? 
N13 C19 1.338(14) . ? 
N13 C17 1.433(13) . ? 
N13 C21 1.473(14) . ? 
N14 C19 1.348(14) . ? 
N14 C23 1.436(13) . ? 
N14 C20 1.451(14) . ? 
N15 C22 1.358(15) . ? 
N15 C24 1.407(14) . ? 
N15 C20 1.452(13) . ? 
N16 C22 1.376(15) . ? 
N16 C18 1.416(13) . ? 
N16 C21 1.440(14) . ? 
N17 C25 1.368(14) . ? 
N17 C23 1.435(13) . ? 
N17 C27 1.446(13) . ? 
N18 C25 1.354(14) . ? 
N18 C29 1.417(13) . ? 
N18 C26 1.437(14) . ? 
N19 C28 1.348(14) . ? 
N19 C30 1.438(13) . ? 
N19 C26 1.489(13) . ? 
N20 C28 1.366(15) . ? 
N20 C27 1.475(14) . ? 
N20 C24 1.478(14) . ? 
N22 C31 1.383(13) . ? 
N22 C54 1.411(12) 5_567 ? 
N22 C33 1.448(13) . ? 
N23 C31 1.362(13) . ? 
N23 C32 1.455(13) . ? 
N23 C35 1.458(13) . ? 
N24 C34 1.361(13) . ? 
N24 C32 1.444(13) . ? 
N24 C36 1.492(13) . ? 
N25 C34 1.381(13) . ? 
N25 C53 1.413(13) 5_567 ? 
N25 C33 1.434(13) . ? 
N26 C37 1.359(13) . ? 
N26 C39 1.432(13) . ? 
N26 C35 1.448(12) . ? 
N27 C37 1.376(13) . ? 
N27 C41 1.442(12) . ? 
N27 C38 1.458(13) . ? 
N28 C40 1.349(13) . ? 
N28 C38 1.434(12) . ? 
N28 C42 1.450(13) . ? 
N29 C40 1.361(13) . ? 
N29 C39 1.448(13) . ? 
N29 C36 1.452(13) . ? 
N30 C43 1.366(14) . ? 
N30 C45 1.436(13) . ? 
N30 C41 1.475(13) . ? 
N31 C43 1.404(13) . ? 
N31 C44 1.469(13) . ? 
N31 C47 1.480(13) . ? 
N32 C46 1.355(14) . ? 
N32 C48 1.447(13) . ? 
N32 C44 1.478(14) . ? 
N33 C46 1.369(14) . ? 
N33 C42 1.413(14) . ? 
N33 C45 1.452(13) . ? 
N34 C49 1.373(14) . ? 
N34 C47 1.422(13) . ? 
N34 C51 1.451(12) . ? 
N35 C49 1.365(15) . ? 
N35 C50 1.453(13) . ? 
N35 C53 1.482(14) . ? 
N36 C52 1.377(14) . ? 
N36 C50 1.442(14) . ? 
N36 C54 1.477(13) . ? 
N37 C52 1.393(14) . ? 
N37 C51 1.423(13) . ? 
N37 C48 1.461(13) . ? 
C2 C3 1.555(14) . ? 
C2 H2 0.9800 . ? 
C3 H3 0.9800 . ? 
C5 H5A 0.9700 . ? 
C5 H5B 0.9700 . ? 
C6 H6A 0.9700 . ? 
C6 H6B 0.9700 . ? 
C8 C9 1.537(15) . ? 
C8 H8 0.9800 . ? 
C9 H9 0.9800 . ? 
C11 H11A 0.9700 . ? 
C11 H11B 0.9700 . ? 
C12 H12A 0.9700 . ? 
C12 H12B 0.9700 . ? 
C14 C15 1.553(15) . ? 
C14 H14 0.9800 . ? 
C15 H15 0.9800 . ? 
C17 H17A 0.9700 . ? 
C17 H17B 0.9700 . ? 
C18 H18C 0.9700 . ? 
C18 H18D 0.9700 . ? 
C20 C21 1.560(15) . ? 
C20 H20 0.9800 . ? 
C21 H21 0.9800 . ? 
C23 H23A 0.9700 . ? 
C23 H23B 0.9700 . ? 
C24 H24A 0.9700 . ? 
C24 H24B 0.9700 . ? 
C26 C27 1.562(16) . ? 
C26 H26 0.9800 . ? 
C27 H27 0.9800 . ? 
C29 H29A 0.9700 . ? 
C29 H29B 0.9700 . ? 
C30 H30A 0.9700 . ? 
C30 H30B 0.9700 . ? 
C32 C33 1.546(15) . ? 
C32 H32 0.9800 . ? 
C33 H33 0.9800 . ? 
C35 H35A 0.9700 . ? 
C35 H35B 0.9700 . ? 
C36 H36A 0.9700 . ? 
C36 H36B 0.9700 . ? 
C38 C39 1.542(14) . ? 
C38 H38 0.9800 . ? 
C39 H39 0.9800 . ? 
C41 H41A 0.9700 . ? 
C41 H41B 0.9700 . ? 
C42 H42A 0.9700 . ? 
C42 H42B 0.9700 . ? 
C44 C45 1.533(15) . ? 
C44 H44 0.9800 . ? 
C45 H45 0.9800 . ? 
C47 H47A 0.9700 . ? 
C47 H47B 0.9700 . ? 
C48 H48A 0.9700 . ? 
C48 H48B 0.9700 . ? 
C50 C51 1.534(14) . ? 
C50 H50 0.9800 . ? 
C51 H51 0.9800 . ? 
C53 N25 1.413(13) 5_567 ? 
C53 H53A 0.9700 . ? 
C53 H53B 0.9700 . ? 
C54 N22 1.411(12) 5_567 ? 
C54 H54A 0.9700 . ? 
C54 H54B 0.9700 . ? 
 
loop_ 
 _geom_angle_atom_site_label_1 
 _geom_angle_atom_site_label_2 
 _geom_angle_atom_site_label_3 
 _geom_angle 
 _geom_angle_site_symmetry_1 
 _geom_angle_site_symmetry_3 
 _geom_angle_publ_flag 
O18 Sm O19 73.1(3) . . ? 
O18 Sm O7 108.6(3) . . ? 
O19 Sm O7 65.6(2) . . ? 
O18 Sm O14 66.4(3) . . ? 
O19 Sm O14 67.6(2) . . ? 
O7 Sm O14 132.0(2) . . ? 
O18 Sm O5 68.0(3) . . ? 
O19 Sm O5 104.5(2) . . ? 
O7 Sm O5 69.5(2) . . ? 
O14 Sm O5 134.0(3) . . ? 
O18 Sm O11 141.6(4) . . ? 
O19 Sm O11 140.3(4) . . ? 
O7 Sm O11 81.2(3) . . ? 
O14 Sm O11 133.9(3) . . ? 
O5 Sm O11 82.3(4) . . ? 
O18 Sm O9 142.8(2) . . ? 
O19 Sm O9 73.9(2) . . ? 
O7 Sm O9 71.9(2) . . ? 
O14 Sm O9 85.5(2) . . ? 
O5 Sm O9 137.8(2) . . ? 
O11 Sm O9 75.5(3) . . ? 
O18 Sm O3 71.8(2) . . ? 
O19 Sm O3 143.7(2) . . ? 
O7 Sm O3 136.2(2) . . ? 
O14 Sm O3 89.6(2) . . ? 
O5 Sm O3 70.7(2) . . ? 
O11 Sm O3 75.9(3) . . ? 
O9 Sm O3 134.5(2) . . ? 
O18 Sm O1 115.1(3) . . ? 
O19 Sm O1 121.1(2) . . ? 
O7 Sm O1 135.8(2) . . ? 
O14 Sm O1 65.1(2) . . ? 
O5 Sm O1 133.6(2) . . ? 
O11 Sm O1 69.0(3) . . ? 
O9 Sm O1 69.5(2) . . ? 
O3 Sm O1 67.4(2) . . ? 
O21 K O4 119.7(4) . . ? 
O21 K O20 66.8(4) . . ? 
O4 K O20 91.7(3) . . ? 
O21 K O10 105.4(4) . . ? 
O4 K O10 134.9(3) . . ? 
O20 K O10 107.2(4) . . ? 
O21 K O6 57.9(4) . . ? 
O4 K O6 75.2(2) . . ? 
O20 K O6 102.6(4) . . ? 
O10 K O6 135.4(2) . . ? 
O21 K O8 50.4(3) . . ? 
O4 K O8 139.1(3) . . ? 
O20 K O8 111.5(3) . . ? 
O10 K O8 71.1(2) . . ? 
O6 K O8 67.3(2) . . ? 
O21 K O2 157.6(4) . . ? 
O4 K O2 70.2(2) . . ? 
O20 K O2 94.0(3) . . ? 
O10 K O2 68.0(2) . . ? 
O6 K O2 141.9(2) . . ? 
O8 K O2 136.6(2) . . ? 
O21 K O12 137.3(5) . . ? 
O4 K O12 75.8(4) . . ? 
O20 K O12 155.9(5) . . ? 
O10 K O12 70.6(4) . . ? 
O6 K O12 94.1(4) . . ? 
O8 K O12 90.8(4) . . ? 
O2 K O12 62.5(4) . . ? 
O15 Re1 O17 109.7(4) . . ? 
O15 Re1 O16 107.1(4) . . ? 
O17 Re1 O16 108.4(3) . . ? 
O15 Re1 O14 109.8(3) . . ? 
O17 Re1 O14 111.8(4) . . ? 
O16 Re1 O14 109.9(3) . . ? 
O22 Re2 O23 109.1(3) . . ? 
O22 Re2 O24 107.7(3) . . ? 
O23 Re2 O24 110.6(3) . . ? 
O22 Re2 O25 109.4(3) . . ? 
O23 Re2 O25 112.1(3) . . ? 
O24 Re2 O25 107.8(3) . . ? 
O27 Re3 O29 110.0(6) . . ? 
O27 Re3 O26 113.9(5) . . ? 
O29 Re3 O26 108.4(5) . . ? 
O27 Re3 O28 108.6(6) . . ? 
O29 Re3 O28 106.2(6) . . ? 
O26 Re3 O28 109.4(6) . . ? 
C1 O1 Sm 137.4(7) . . ? 
C4 O2 K 126.2(7) . . ? 
C7 O3 Sm 133.0(7) . . ? 
C10 O4 K 124.7(7) . . ? 
C13 O5 Sm 135.9(7) . . ? 
C16 O6 K 125.3(7) . . ? 
C19 O7 Sm 137.8(7) . . ? 
C22 O8 K 128.6(8) . . ? 
C25 O9 Sm 133.0(6) . . ? 
C28 O10 K 127.0(7) . . ? 
N21 O11 Sm 154.8(11) . . ? 
N21 O12 K 116.5(14) . . ? 
Re1 O14 Sm 152.7(4) . . ? 
Sm O18 H18A 128.3 . . ? 
Sm O18 H18B 110.2 . . ? 
H18A O18 H18B 120.8 . . ? 
Sm O19 H19A 118.8 . . ? 
Sm O19 H19B 125.1 . . ? 
H19A O19 H19B 109.2 . . ? 
H39A O39 H39B 103.8 . . ? 
C1 N1 C3 112.4(8) . . ? 
C1 N1 C29 121.9(9) . . ? 
C3 N1 C29 125.5(8) . . ? 
C1 N2 C2 111.0(9) . . ? 
C1 N2 C5 121.3(9) . . ? 
C2 N2 C5 125.7(8) . . ? 
C4 N3 C2 114.6(9) . . ? 
C4 N3 C6 121.2(9) . . ? 
C2 N3 C6 123.0(9) . . ? 
C4 N4 C3 114.9(9) . . ? 
C4 N4 C30 118.5(9) . . ? 
C3 N4 C30 125.9(8) . . ? 
C7 N5 C9 115.7(9) . . ? 
C7 N5 C5 118.9(9) . . ? 
C9 N5 C5 123.7(9) . . ? 
C7 N6 C11 120.2(9) . . ? 
C7 N6 C8 112.9(9) . . ? 
C11 N6 C8 125.6(9) . . ? 
C10 N7 C8 111.9(10) . . ? 
C10 N7 C12 118.7(10) . . ? 
C8 N7 C12 123.4(9) . . ? 
C10 N8 C6 123.1(10) . . ? 
C10 N8 C9 112.7(10) . . ? 
C6 N8 C9 124.0(9) . . ? 
C13 N9 C11 122.6(10) . . ? 
C13 N9 C15 112.0(10) . . ? 
C11 N9 C15 123.7(9) . . ? 
C13 N10 C17 123.1(9) . . ? 
C13 N10 C14 113.4(9) . . ? 
C17 N10 C14 123.5(9) . . ? 
C16 N11 C14 113.2(10) . . ? 
C16 N11 C18 122.1(10) . . ? 
C14 N11 C18 124.3(9) . . ? 
C16 N12 C12 122.6(9) . . ? 
C16 N12 C15 111.8(9) . . ? 
C12 N12 C15 125.1(9) . . ? 
C19 N13 C17 125.1(10) . . ? 
C19 N13 C21 113.0(9) . . ? 
C17 N13 C21 121.9(9) . . ? 
C19 N14 C23 122.0(9) . . ? 
C19 N14 C20 112.1(9) . . ? 
C23 N14 C20 124.0(9) . . ? 
C22 N15 C24 122.2(10) . . ? 
C22 N15 C20 112.7(10) . . ? 
C24 N15 C20 123.8(9) . . ? 
C22 N16 C18 125.2(10) . . ? 
C22 N16 C21 110.8(10) . . ? 
C18 N16 C21 123.1(10) . . ? 
C25 N17 C23 123.3(9) . . ? 
C25 N17 C27 111.1(9) . . ? 
C23 N17 C27 124.5(9) . . ? 
C25 N18 C29 122.9(10) . . ? 
C25 N18 C26 111.6(9) . . ? 
C29 N18 C26 125.5(9) . . ? 
C28 N19 C30 122.7(10) . . ? 
C28 N19 C26 113.5(10) . . ? 
C30 N19 C26 123.3(9) . . ? 
C28 N20 C27 112.6(10) . . ? 
C28 N20 C24 121.0(10) . . ? 
C27 N20 C24 122.4(9) . . ? 
O13 N21 O11 116.7(16) . . ? 
O13 N21 O12 127.8(19) . . ? 
O11 N21 O12 115.5(15) . . ? 
C31 N22 C54 122.4(8) . 5_567 ? 
C31 N22 C33 112.9(8) . . ? 
C54 N22 C33 121.9(8) 5_567 . ? 
C31 N23 C32 111.2(9) . . ? 
C31 N23 C35 122.2(9) . . ? 
C32 N23 C35 123.6(9) . . ? 
C34 N24 C32 113.3(9) . . ? 
C34 N24 C36 121.9(8) . . ? 
C32 N24 C36 121.9(9) . . ? 
C34 N25 C53 119.4(9) . 5_567 ? 
C34 N25 C33 112.1(8) . . ? 
C53 N25 C33 119.6(8) 5_567 . ? 
C37 N26 C39 114.2(9) . . ? 
C37 N26 C35 121.1(9) . . ? 
C39 N26 C35 123.1(9) . . ? 
C37 N27 C41 121.4(9) . . ? 
C37 N27 C38 111.7(9) . . ? 
C41 N27 C38 122.2(8) . . ? 
C40 N28 C38 112.5(9) . . ? 
C40 N28 C42 123.9(9) . . ? 
C38 N28 C42 123.0(8) . . ? 
C40 N29 C39 111.3(9) . . ? 
C40 N29 C36 120.0(9) . . ? 
C39 N29 C36 123.6(9) . . ? 
C43 N30 C45 114.1(8) . . ? 
C43 N30 C41 121.9(8) . . ? 
C45 N30 C41 123.5(8) . . ? 
C43 N31 C44 112.5(9) . . ? 
C43 N31 C47 122.3(9) . . ? 
C44 N31 C47 122.7(8) . . ? 
C46 N32 C48 123.9(9) . . ? 
C46 N32 C44 112.2(9) . . ? 
C48 N32 C44 123.8(9) . . ? 
C46 N33 C42 120.1(9) . . ? 
C46 N33 C45 111.7(9) . . ? 
C42 N33 C45 124.4(9) . . ? 
C49 N34 C47 124.7(9) . . ? 
C49 N34 C51 111.1(9) . . ? 
C47 N34 C51 122.2(8) . . ? 
C49 N35 C50 111.9(9) . . ? 
C49 N35 C53 123.4(9) . . ? 
C50 N35 C53 121.9(9) . . ? 
C52 N36 C50 113.3(9) . . ? 
C52 N36 C54 118.4(9) . . ? 
C50 N36 C54 118.5(9) . . ? 
C52 N37 C51 112.9(9) . . ? 
C52 N37 C48 120.6(9) . . ? 
C51 N37 C48 121.4(9) . . ? 
O1 C1 N2 126.3(11) . . ? 
O1 C1 N1 123.7(10) . . ? 
N2 C1 N1 109.9(9) . . ? 
N3 C2 N2 116.6(9) . . ? 
N3 C2 C3 104.4(9) . . ? 
N2 C2 C3 103.2(8) . . ? 
N3 C2 H2 110.7 . . ? 
N2 C2 H2 110.7 . . ? 
C3 C2 H2 110.7 . . ? 
N1 C3 N4 115.5(9) . . ? 
N1 C3 C2 102.2(8) . . ? 
N4 C3 C2 101.1(8) . . ? 
N1 C3 H3 112.4 . . ? 
N4 C3 H3 112.4 . . ? 
C2 C3 H3 112.4 . . ? 
O2 C4 N3 127.7(11) . . ? 
O2 C4 N4 127.4(11) . . ? 
N3 C4 N4 104.7(10) . . ? 
N2 C5 N5 114.7(9) . . ? 
N2 C5 H5A 108.6 . . ? 
N5 C5 H5A 108.6 . . ? 
N2 C5 H5B 108.6 . . ? 
N5 C5 H5B 108.6 . . ? 
H5A C5 H5B 107.6 . . ? 
N8 C6 N3 114.0(9) . . ? 
N8 C6 H6A 108.8 . . ? 
N3 C6 H6A 108.8 . . ? 
N8 C6 H6B 108.8 . . ? 
N3 C6 H6B 108.8 . . ? 
H6A C6 H6B 107.6 . . ? 
O3 C7 N5 128.4(11) . . ? 
O3 C7 N6 127.4(11) . . ? 
N5 C7 N6 104.1(10) . . ? 
N6 C8 N7 112.9(9) . . ? 
N6 C8 C9 104.1(9) . . ? 
N7 C8 C9 103.5(8) . . ? 
N6 C8 H8 111.9 . . ? 
N7 C8 H8 111.9 . . ? 
C9 C8 H8 111.9 . . ? 
N5 C9 N8 114.2(9) . . ? 
N5 C9 C8 102.1(9) . . ? 
N8 C9 C8 103.4(9) . . ? 
N5 C9 H9 112.1 . . ? 
N8 C9 H9 112.1 . . ? 
C8 C9 H9 112.1 . . ? 
O4 C10 N8 125.3(11) . . ? 
O4 C10 N7 127.8(12) . . ? 
N8 C10 N7 106.9(11) . . ? 
N6 C11 N9 113.9(9) . . ? 
N6 C11 H11A 108.8 . . ? 
N9 C11 H11A 108.8 . . ? 
N6 C11 H11B 108.8 . . ? 
N9 C11 H11B 108.8 . . ? 
H11A C11 H11B 107.7 . . ? 
N12 C12 N7 113.0(9) . . ? 
N12 C12 H12A 109.0 . . ? 
N7 C12 H12A 109.0 . . ? 
N12 C12 H12B 109.0 . . ? 
N7 C12 H12B 109.0 . . ? 
H12A C12 H12B 107.8 . . ? 
O5 C13 N10 128.4(10) . . ? 
O5 C13 N9 122.8(12) . . ? 
N10 C13 N9 108.7(11) . . ? 
N11 C14 N10 116.2(9) . . ? 
N11 C14 C15 102.3(9) . . ? 
N10 C14 C15 104.7(8) . . ? 
N11 C14 H14 111.0 . . ? 
N10 C14 H14 111.0 . . ? 
C15 C14 H14 111.0 . . ? 
N12 C15 N9 113.2(9) . . ? 
N12 C15 C14 104.4(9) . . ? 
N9 C15 C14 101.1(9) . . ? 
N12 C15 H15 112.5 . . ? 
N9 C15 H15 112.5 . . ? 
C14 C15 H15 112.5 . . ? 
O6 C16 N12 125.8(10) . . ? 
O6 C16 N11 125.7(12) . . ? 
N12 C16 N11 108.1(11) . . ? 
N13 C17 N10 113.0(9) . . ? 
N13 C17 H17A 109.0 . . ? 
N10 C17 H17A 109.0 . . ? 
N13 C17 H17B 109.0 . . ? 
N10 C17 H17B 109.0 . . ? 
H17A C17 H17B 107.8 . . ? 
N16 C18 N11 113.1(9) . . ? 
N16 C18 H18C 108.9 . . ? 
N11 C18 H18C 108.9 . . ? 
N16 C18 H18D 108.9 . . ? 
N11 C18 H18D 108.9 . . ? 
H18C C18 H18D 107.8 . . ? 
O7 C19 N13 125.2(11) . . ? 
O7 C19 N14 125.1(11) . . ? 
N13 C19 N14 109.7(10) . . ? 
N15 C20 N14 117.3(9) . . ? 
N15 C20 C21 101.8(9) . . ? 
N14 C20 C21 103.8(9) . . ? 
N15 C20 H20 111.1 . . ? 
N14 C20 H20 111.1 . . ? 
C21 C20 H20 111.1 . . ? 
N16 C21 N13 114.6(9) . . ? 
N16 C21 C20 104.8(9) . . ? 
N13 C21 C20 101.3(9) . . ? 
N16 C21 H21 111.8 . . ? 
N13 C21 H21 111.8 . . ? 
C20 C21 H21 111.8 . . ? 
O8 C22 N15 125.0(12) . . ? 
O8 C22 N16 125.6(12) . . ? 
N15 C22 N16 109.4(11) . . ? 
N17 C23 N14 113.3(9) . . ? 
N17 C23 H23A 108.9 . . ? 
N14 C23 H23A 108.9 . . ? 
N17 C23 H23B 108.9 . . ? 
N14 C23 H23B 108.9 . . ? 
H23A C23 H23B 107.7 . . ? 
N15 C24 N20 114.7(9) . . ? 
N15 C24 H24A 108.6 . . ? 
N20 C24 H24A 108.6 . . ? 
N15 C24 H24B 108.6 . . ? 
N20 C24 H24B 108.6 . . ? 
H24A C24 H24B 107.6 . . ? 
O9 C25 N18 126.6(11) . . ? 
O9 C25 N17 123.4(10) . . ? 
N18 C25 N17 109.9(10) . . ? 
N18 C26 N19 114.8(9) . . ? 
N18 C26 C27 103.7(9) . . ? 
N19 C26 C27 101.8(9) . . ? 
N18 C26 H26 111.9 . . ? 
N19 C26 H26 111.9 . . ? 
C27 C26 H26 111.9 . . ? 
N17 C27 N20 114.5(9) . . ? 
N17 C27 C26 102.9(9) . . ? 
N20 C27 C26 102.8(9) . . ? 
N17 C27 H27 112.0 . . ? 
N20 C27 H27 112.0 . . ? 
C26 C27 H27 112.0 . . ? 
O10 C28 N19 125.0(12) . . ? 
O10 C28 N20 126.8(11) . . ? 
N19 C28 N20 108.2(11) . . ? 
N18 C29 N1 115.3(9) . . ? 
N18 C29 H29A 108.4 . . ? 
N1 C29 H29A 108.4 . . ? 
N18 C29 H29B 108.4 . . ? 
N1 C29 H29B 108.4 . . ? 
H29A C29 H29B 107.5 . . ? 
N19 C30 N4 115.4(9) . . ? 
N19 C30 H30A 108.4 . . ? 
N4 C30 H30A 108.4 . . ? 
N19 C30 H30B 108.4 . . ? 
N4 C30 H30B 108.4 . . ? 
H30A C30 H30B 107.5 . . ? 
O30 C31 N23 126.7(10) . . ? 
O30 C31 N22 124.4(9) . . ? 
N23 C31 N22 108.6(9) . . ? 
N24 C32 N23 114.2(8) . . ? 
N24 C32 C33 102.5(9) . . ? 
N23 C32 C33 105.0(9) . . ? 
N24 C32 H32 111.5 . . ? 
N23 C32 H32 111.5 . . ? 
C33 C32 H32 111.5 . . ? 
N25 C33 N22 116.0(9) . . ? 
N25 C33 C32 104.1(8) . . ? 
N22 C33 C32 102.2(8) . . ? 
N25 C33 H33 111.3 . . ? 
N22 C33 H33 111.3 . . ? 
C32 C33 H33 111.3 . . ? 
O31 C34 N24 126.1(10) . . ? 
O31 C34 N25 126.4(10) . . ? 
N24 C34 N25 107.4(9) . . ? 
N26 C35 N23 114.4(8) . . ? 
N26 C35 H35A 108.7 . . ? 
N23 C35 H35A 108.7 . . ? 
N26 C35 H35B 108.7 . . ? 
N23 C35 H35B 108.7 . . ? 
H35A C35 H35B 107.6 . . ? 
N29 C36 N24 111.2(8) . . ? 
N29 C36 H36A 109.4 . . ? 
N24 C36 H36A 109.4 . . ? 
N29 C36 H36B 109.4 . . ? 
N24 C36 H36B 109.4 . . ? 
H36A C36 H36B 108.0 . . ? 
O32 C37 N26 128.4(10) . . ? 
O32 C37 N27 124.4(10) . . ? 
N26 C37 N27 107.2(9) . . ? 
N28 C38 N27 115.7(9) . . ? 
N28 C38 C39 103.1(8) . . ? 
N27 C38 C39 103.5(8) . . ? 
N28 C38 H38 111.3 . . ? 
N27 C38 H38 111.3 . . ? 
C39 C38 H38 111.3 . . ? 
N26 C39 N29 111.6(8) . . ? 
N26 C39 C38 102.8(8) . . ? 
N29 C39 C38 103.2(8) . . ? 
N26 C39 H39 112.8 . . ? 
N29 C39 H39 112.8 . . ? 
C38 C39 H39 112.8 . . ? 
O33 C40 N28 125.6(10) . . ? 
O33 C40 N29 125.2(10) . . ? 
N28 C40 N29 109.2(10) . . ? 
N27 C41 N30 114.4(8) . . ? 
N27 C41 H41A 108.7 . . ? 
N30 C41 H41A 108.7 . . ? 
N27 C41 H41B 108.7 . . ? 
N30 C41 H41B 108.7 . . ? 
H41A C41 H41B 107.6 . . ? 
N33 C42 N28 114.3(9) . . ? 
N33 C42 H42A 108.7 . . ? 
N28 C42 H42A 108.7 . . ? 
N33 C42 H42B 108.7 . . ? 
N28 C42 H42B 108.7 . . ? 
H42A C42 H42B 107.6 . . ? 
O34 C43 N30 128.4(10) . . ? 
O34 C43 N31 125.4(11) . . ? 
N30 C43 N31 106.1(10) . . ? 
N31 C44 N32 114.5(8) . . ? 
N31 C44 C45 102.5(9) . . ? 
N32 C44 C45 102.4(9) . . ? 
N31 C44 H44 112.2 . . ? 
N32 C44 H44 112.2 . . ? 
C45 C44 H44 112.2 . . ? 
N30 C45 N33 114.7(9) . . ? 
N30 C45 C44 104.3(9) . . ? 
N33 C45 C44 104.5(8) . . ? 
N30 C45 H45 110.9 . . ? 
N33 C45 H45 110.9 . . ? 
C44 C45 H45 110.9 . . ? 
O35 C46 N32 124.9(11) . . ? 
O35 C46 N33 126.1(11) . . ? 
N32 C46 N33 109.0(9) . . ? 
N34 C47 N31 115.7(9) . . ? 
N34 C47 H47A 108.3 . . ? 
N31 C47 H47A 108.3 . . ? 
N34 C47 H47B 108.3 . . ? 
N31 C47 H47B 108.3 . . ? 
H47A C47 H47B 107.4 . . ? 
N32 C48 N37 114.3(8) . . ? 
N32 C48 H48A 108.7 . . ? 
N37 C48 H48A 108.7 . . ? 
N32 C48 H48B 108.7 . . ? 
N37 C48 H48B 108.7 . . ? 
H48A C48 H48B 107.6 . . ? 
O36 C49 N35 125.2(11) . . ? 
O36 C49 N34 125.6(12) . . ? 
N35 C49 N34 109.2(10) . . ? 
N36 C50 N35 113.5(8) . . ? 
N36 C50 C51 102.9(9) . . ? 
N35 C50 C51 103.3(8) . . ? 
N36 C50 H50 112.1 . . ? 
N35 C50 H50 112.1 . . ? 
C51 C50 H50 112.1 . . ? 
N37 C51 N34 115.1(9) . . ? 
N37 C51 C50 104.3(8) . . ? 
N34 C51 C50 104.4(8) . . ? 
N37 C51 H51 110.9 . . ? 
N34 C51 H51 110.9 . . ? 
C50 C51 H51 110.9 . . ? 
O37 C52 N36 127.2(11) . . ? 
O37 C52 N37 126.9(10) . . ? 
N36 C52 N37 105.9(9) . . ? 
N25 C53 N35 113.9(9) 5_567 . ? 
N25 C53 H53A 108.8 5_567 . ? 
N35 C53 H53A 108.8 . . ? 
N25 C53 H53B 108.8 5_567 . ? 
N35 C53 H53B 108.8 . . ? 
H53A C53 H53B 107.7 . . ? 
N22 C54 N36 112.8(8) 5_567 . ? 
N22 C54 H54A 109.0 5_567 . ? 
N36 C54 H54A 109.0 . . ? 
N22 C54 H54B 109.0 5_567 . ? 
N36 C54 H54B 109.0 . . ? 
H54A C54 H54B 107.8 . . ? 
 
loop_ 
 _geom_hbond_atom_site_label_D 
 _geom_hbond_atom_site_label_H 
 _geom_hbond_atom_site_label_A 
 _geom_hbond_distance_DH 
 _geom_hbond_distance_HA 
 _geom_hbond_distance_DA 
 _geom_hbond_angle_DHA 
 _geom_hbond_site_symmetry_A 
O18 H18A O30  0.86 1.94 2.701(10) 146.5 . 
O18 H18B O32  0.89 1.92 2.752(10) 155.7 . 
O19 H19A O34  0.91 1.98 2.784(10) 145.9 . 
O19 H19B O36  0.93 1.98 2.897(10) 173.5 . 
O39 H39A O22  0.97 1.92 2.871(10) 167.0 . 
O39 H39B O26  0.97 2.14 2.847(15) 128.9 . 

#===END

data_4
 
_audit_creation_method            SHELXL-97 
_chemical_name_systematic         ?
_chemical_name_common             ? 
_chemical_melting_point           ? 
_chemical_formula_moiety          ? 
_chemical_formula_sum             'C30 H46 Gd K N21 O33 Re3' 
_chemical_formula_weight          1983.83 
 
loop_ 
 _atom_type_symbol 
 _atom_type_description 
 _atom_type_scat_dispersion_real 
 _atom_type_scat_dispersion_imag 
 _atom_type_scat_source 
 'C'  'C'   0.0033   0.0016 
 'International Tables Vol C Tables 4.2.6.8 and 6.1.1.4' 
 'H'  'H'   0.0000   0.0000 
 'International Tables Vol C Tables 4.2.6.8 and 6.1.1.4' 
 'N'  'N'   0.0061   0.0033 
 'International Tables Vol C Tables 4.2.6.8 and 6.1.1.4' 
 'O'  'O'   0.0106   0.0060 
 'International Tables Vol C Tables 4.2.6.8 and 6.1.1.4' 
 'Gd'  'Gd'  -0.1653   3.9035 
 'International Tables Vol C Tables 4.2.6.8 and 6.1.1.4' 
 'Re'  'Re'  -1.0185   7.2310 
 'International Tables Vol C Tables 4.2.6.8 and 6.1.1.4' 
 'K'  'K'   0.2009   0.2494 
 'International Tables Vol C Tables 4.2.6.8 and 6.1.1.4' 
 
_symmetry_cell_setting            orthorhombic
_symmetry_space_group_name_H-M    'P n a 21'
 
loop_ 
 _symmetry_equiv_pos_as_xyz 
 'x, y, z' 
 '-x, -y, z+1/2' 
 'x+1/2, -y+1/2, z' 
 '-x+1/2, y+1/2, z+1/2' 
 
_cell_length_a                    20.0457(3) 
_cell_length_b                    14.1521(4) 
_cell_length_c                    17.7711(5) 
_cell_angle_alpha                 90.00 
_cell_angle_beta                  90.00 
_cell_angle_gamma                 90.00 
_cell_volume                      5041.5(2) 
_cell_formula_units_Z             4 
_cell_measurement_temperature     100(2) 
_cell_measurement_reflns_used     83837
_cell_measurement_theta_min       3.06
_cell_measurement_theta_max       25.68
 
_exptl_crystal_description        parallelepiped
_exptl_crystal_colour             colourless
_exptl_crystal_size_max           0.17
_exptl_crystal_size_mid           0.14
_exptl_crystal_size_min           0.14
_exptl_crystal_density_meas       ? 
_exptl_crystal_density_diffrn     2.614 
_exptl_crystal_density_method     'not measured' 
_exptl_crystal_F_000              3780 
_exptl_absorpt_coefficient_mu     8.689 
_exptl_absorpt_correction_type    'multi-scan'
_exptl_absorpt_correction_T_min   0.234
_exptl_absorpt_correction_T_max   0.296
_exptl_absorpt_process_details    
'SCALEPACK (Otwinowski & Minor, 1997)'  
_exptl_special_details
'crystal-to-detector distance 35 mm'
_diffrn_ambient_temperature       100(2)
_diffrn_radiation_wavelength      0.71073 
_diffrn_radiation_type            MoK\a 
_diffrn_radiation_source          'fine-focus sealed tube' 
_diffrn_radiation_monochromator   graphite 
_diffrn_measurement_device_type   
'Nonius Kappa-CCD area-detector diffractometer'  
_diffrn_measurement_method        
'two \f and two \w scans with 2\% steps (279 frames)' 
_diffrn_standards_interval_time   0
_diffrn_standards_number          0
_diffrn_standards_decay_%         0
_diffrn_reflns_number             83837
_diffrn_reflns_av_R_equivalents   0.0228  
_diffrn_reflns_av_sigmaI/netI     0.0301 
_diffrn_reflns_limit_h_min        -24 
_diffrn_reflns_limit_h_max        24 
_diffrn_reflns_limit_k_min        -17 
_diffrn_reflns_limit_k_max        17 
_diffrn_reflns_limit_l_min        -21 
_diffrn_reflns_limit_l_max        21 
_diffrn_reflns_theta_min          3.06 
_diffrn_reflns_theta_max          25.68 
_reflns_number_total              9042 
_reflns_number_gt                 8615 
_reflns_threshold_expression      >2sigma(I) 
 
_computing_data_collection        'COLLECT (Nonius, 1998)'
_computing_cell_refinement        'HKL2000 (Otwinowski & Minor, 1997)'
_computing_data_reduction         'HKL2000 (Otwinowski & Minor, 1997)'
_computing_structure_solution     'SHELXS-97 (Sheldrick, 2008)' 
_computing_structure_refinement   'SHELXL-97 (Sheldrick, 2008)' 
_computing_molecular_graphics     'SHELXTL (Sheldrick, 2008)' 
_computing_publication_material   
'SHELXTL (Sheldrick, 2008); PLATON (Spek, 2003)' 
 
_refine_special_details 
;
 Structure solved by direct methods and subsequent Fourier-difference
 synthesis. All non-hydrogen atoms were refined with anisotropic
 displacement parameters, with restraints on bond lengths and displacement
 parameters for the O atoms of the perrhenate ion containing Re3. The H atoms 
 bound to O14, O15, O16 and O32 were found on a Fourier-difference map, but 
 not those of the other water molecules. The C-bound H atoms were introduced 
 at calculated positions. All were treated as riding atoms with an isotropic 
 displacement parameter equal to 1.2 times that of the parent atom. The 
 highest residual electron density is close to Re3 and likely indicates
 some unresolved disorder.
 Refinement of F^2^ against ALL reflections.  The weighted R-factor wR and 
 goodness of fit S are based on F^2^, conventional R-factors R are based 
 on F, with F set to zero for negative F^2^. The threshold expression of 
 F^2^ > 2sigma(F^2^) is used only for calculating R-factors(gt) etc. and is 
 not relevant to the choice of reflections for refinement.  R-factors based 
 on F^2^ are statistically about twice as large as those based on F, and R- 
 factors based on ALL data will be even larger. 
;
_refine_ls_structure_factor_coef  Fsqd  
_refine_ls_matrix_type            full 
_refine_ls_weighting_scheme       calc  
_refine_ls_weighting_details 
 'calc w=1/[\s^2^(Fo^2^)+(0.0543P)^2^+38.6035P] where P=(Fo^2^+2Fc^2^)/3' 
_atom_sites_solution_primary      direct 
_atom_sites_solution_secondary    difmap 
_atom_sites_solution_hydrogens    geom 
_refine_ls_hydrogen_treatment     constr
_refine_ls_extinction_method      none 
_refine_ls_extinction_coef        ? 
_refine_ls_abs_structure_details 
 'Flack H D (1983), Acta Cryst. A39, 876-881' 
_refine_ls_abs_structure_Flack    0.532(8) 
_refine_ls_number_reflns          9042 
_refine_ls_number_parameters      803 
_refine_ls_number_restraints      31 
_refine_ls_R_factor_all           0.0393 
_refine_ls_R_factor_gt            0.0366 
_refine_ls_wR_factor_ref          0.0925 
_refine_ls_wR_factor_gt           0.0911 
_refine_ls_goodness_of_fit_ref    1.020 
_refine_ls_restrained_S_all       1.024 
_refine_ls_shift/su_max           0.001 
_refine_ls_shift/su_mean          0.000 
_diffrn_measured_fraction_theta_max    0.982 
_diffrn_reflns_theta_full              25.68 
_diffrn_measured_fraction_theta_full   0.982 
_refine_diff_density_max    3.159 
_refine_diff_density_min   -3.155 
_refine_diff_density_rms    0.177 
 
loop_ 
 _atom_site_label 
 _atom_site_type_symbol 
 _atom_site_fract_x 
 _atom_site_fract_y 
 _atom_site_fract_z 
 _atom_site_U_iso_or_equiv 
 _atom_site_adp_type 
 _atom_site_occupancy 
 _atom_site_symmetry_multiplicity 
 _atom_site_calc_flag 
 _atom_site_refinement_flags 
 _atom_site_disorder_assembly 
 _atom_site_disorder_group 
Gd Gd 0.43739(2) 0.41410(3) 0.77573(3) 0.01666(10) Uani 1 1 d . . . 
K K 0.76276(10) 0.23906(15) 0.84239(12) 0.0214(4) Uani 1 1 d . . . 
Re1 Re 0.367801(19) 0.13474(3) 0.53033(2) 0.02629(10) Uani 1 1 d . . . 
Re2 Re 0.20580(2) 0.66399(3) 0.65226(2) 0.02773(10) Uani 1 1 d . . . 
Re3 Re 0.37597(3) 0.79166(4) 0.83734(4) 0.05438(16) Uani 1 1 d . . . 
O1 O 0.4509(3) 0.4542(4) 0.9172(3) 0.0183(13) Uani 1 1 d . . . 
O2 O 0.7239(3) 0.3071(5) 0.9841(4) 0.0264(15) Uani 1 1 d . . . 
O3 O 0.5076(3) 0.5530(5) 0.7884(4) 0.0224(14) Uani 1 1 d . . . 
O4 O 0.7882(3) 0.4270(5) 0.8513(4) 0.0234(15) Uani 1 1 d . . . 
O5 O 0.4967(3) 0.4468(4) 0.6530(4) 0.0201(13) Uani 1 1 d . . . 
O6 O 0.7694(3) 0.2931(5) 0.6968(4) 0.0210(14) Uani 1 1 d . . . 
O7 O 0.4503(3) 0.2730(5) 0.7008(4) 0.0224(14) Uani 1 1 d . . . 
O8 O 0.7126(3) 0.1010(5) 0.7364(4) 0.0228(15) Uani 1 1 d . . . 
O9 O 0.4087(3) 0.2695(4) 0.8559(3) 0.0187(14) Uani 1 1 d . . . 
O10 O 0.6803(3) 0.1119(5) 0.9165(4) 0.0242(15) Uani 1 1 d . . . 
O11 O 0.5398(4) 0.3565(6) 0.8282(4) 0.0338(17) Uani 1 1 d . . . 
O12 O 0.6383(4) 0.3110(7) 0.8546(4) 0.046(2) Uani 1 1 d . . . 
O13 O 0.6022(4) 0.3074(7) 0.7403(4) 0.040(2) Uani 1 1 d . . . 
O14 O 0.3346(3) 0.4337(5) 0.8445(4) 0.0191(13) Uani 1 1 d . . . 
H14A H 0.3410 0.4253 0.8887 0.023 Uiso 1 1 d R . . 
H14B H 0.3135 0.4911 0.8397 0.023 Uiso 1 1 d R . . 
O15 O 0.3867(3) 0.5550(5) 0.7292(4) 0.0265(15) Uani 1 1 d . . . 
H15A H 0.3569 0.5634 0.6949 0.032 Uiso 1 1 d R . . 
H15B H 0.3995 0.6005 0.7519 0.032 Uiso 1 1 d R . . 
O16 O 0.3445(3) 0.3815(5) 0.6906(4) 0.0216(14) Uani 1 1 d . . . 
H16A H 0.3377 0.3269 0.6665 0.026 Uiso 1 1 d R . . 
H16B H 0.3041 0.3783 0.7167 0.026 Uiso 1 1 d R . . 
O17 O 0.7987(3) 0.1288(5) 0.9902(4) 0.0229(15) Uani 1 1 d . . . 
O18 O 0.3605(4) 0.2537(6) 0.5526(4) 0.0315(17) Uani 1 1 d . . . 
O19 O 0.2906(4) 0.0931(6) 0.5023(4) 0.0347(18) Uani 1 1 d . . . 
O20 O 0.4255(4) 0.1227(7) 0.4597(6) 0.050(2) Uani 1 1 d . . . 
O21 O 0.3932(4) 0.0713(6) 0.6083(5) 0.0401(19) Uani 1 1 d . . . 
O22 O 0.2691(4) 0.5846(5) 0.6495(5) 0.0377(18) Uani 1 1 d . . . 
O23 O 0.2334(6) 0.7759(6) 0.6334(5) 0.063(3) Uani 1 1 d . . . 
O24 O 0.1689(6) 0.6672(6) 0.7395(5) 0.059(3) Uani 1 1 d . . . 
O25 O 0.1445(6) 0.6320(11) 0.5894(8) 0.085(4) Uani 1 1 d U . . 
O26 O 0.4051(10) 0.7382(11) 0.7489(9) 0.104(5) Uani 1 1 d U . . 
O27 O 0.4018(8) 0.9022(9) 0.8354(9) 0.094(4) Uani 1 1 d U . . 
O28 O 0.4107(6) 0.7222(9) 0.9029(8) 0.081(3) Uani 1 1 d U . . 
O29 O 0.2976(11) 0.7797(18) 0.8251(15) 0.094(7) Uani 1 1 d U . . 
O30 O 0.2651(5) 0.5928(6) 0.8586(5) 0.053(3) Uani 1 1 d . . . 
O31 O 0.1200(4) 0.5023(8) 0.4791(5) 0.049(2) Uani 1 1 d . . . 
O32 O 0.5180(6) 0.8139(9) 0.6761(6) 0.068(3) Uani 1 1 d . . . 
H32A H 0.4795 0.8016 0.6890 0.081 Uiso 1 1 d R . . 
H32B H 0.5467 0.8059 0.7120 0.081 Uiso 1 1 d R . . 
O33 O 0.5599(12) -0.2279(12) 0.8311(12) 0.060(6) Uani 1 1 d . . . 
N1 N 0.5038(4) 0.3654(6) 1.0090(4) 0.0217(18) Uani 1 1 d . . . 
N2 N 0.5455(4) 0.5043(6) 0.9802(5) 0.0226(17) Uani 1 1 d . . . 
N3 N 0.6587(4) 0.4406(6) 0.9959(5) 0.0240(18) Uani 1 1 d . . . 
N4 N 0.6162(4) 0.3013(6) 1.0310(5) 0.0240(17) Uani 1 1 d . . . 
N5 N 0.5946(4) 0.5812(6) 0.8708(5) 0.0243(19) Uani 1 1 d . . . 
N6 N 0.6146(4) 0.5837(6) 0.7487(5) 0.0224(18) Uani 1 1 d . . . 
N7 N 0.7253(4) 0.5217(5) 0.7732(5) 0.0216(16) Uani 1 1 d . . . 
N8 N 0.7102(4) 0.5328(6) 0.8964(5) 0.0225(17) Uani 1 1 d . . . 
N9 N 0.6046(4) 0.4962(6) 0.6323(4) 0.0252(19) Uani 1 1 d . . . 
N10 N 0.5721(4) 0.3574(6) 0.5857(4) 0.0189(17) Uani 1 1 d . . . 
N11 N 0.6848(4) 0.2920(5) 0.6073(4) 0.0193(16) Uani 1 1 d . . . 
N12 N 0.7154(4) 0.4290(6) 0.6588(5) 0.0219(16) Uani 1 1 d . . . 
N13 N 0.5281(4) 0.2060(5) 0.6239(4) 0.0209(17) Uani 1 1 d . . . 
N14 N 0.4947(4) 0.1262(5) 0.7242(4) 0.0174(16) Uani 1 1 d . . . 
N15 N 0.6028(4) 0.0515(6) 0.7373(4) 0.0206(17) Uani 1 1 d . . . 
N16 N 0.6396(4) 0.1371(5) 0.6400(4) 0.0199(17) Uani 1 1 d . . . 
N17 N 0.4600(4) 0.1234(6) 0.8538(4) 0.0207(17) Uani 1 1 d . . . 
N18 N 0.4722(4) 0.2149(6) 0.9544(4) 0.0195(17) Uani 1 1 d . . . 
N19 N 0.5824(4) 0.1471(6) 0.9819(5) 0.0231(18) Uani 1 1 d . . . 
N20 N 0.5764(4) 0.0759(6) 0.8690(5) 0.0224(18) Uani 1 1 d . . . 
N21 N 0.5921(4) 0.3257(6) 0.8073(5) 0.0247(18) Uani 1 1 d . . . 
C1 C 0.4969(5) 0.4445(7) 0.9628(5) 0.023(2) Uani 1 1 d . . . 
C2 C 0.5964(4) 0.4646(7) 1.0307(5) 0.0214(19) Uani 1 1 d . . . 
H2 H 0.6031 0.5048 1.0750 0.026 Uiso 1 1 calc R . . 
C3 C 0.5645(5) 0.3691(8) 1.0524(5) 0.023(2) Uani 1 1 d . . . 
H3 H 0.5552 0.3661 1.1065 0.028 Uiso 1 1 calc R . . 
C4 C 0.6713(5) 0.3432(7) 1.0009(5) 0.023(2) Uani 1 1 d . . . 
C5 C 0.5548(5) 0.5895(7) 0.9372(6) 0.025(2) Uani 1 1 d . . . 
H5A H 0.5112 0.6132 0.9228 0.030 Uiso 1 1 calc R . . 
H5B H 0.5751 0.6365 0.9697 0.030 Uiso 1 1 calc R . . 
C6 C 0.7103(6) 0.5055(7) 0.9746(6) 0.030(2) Uani 1 1 d . . . 
H6A H 0.7531 0.4772 0.9863 0.036 Uiso 1 1 calc R . . 
H6B H 0.7059 0.5620 1.0051 0.036 Uiso 1 1 calc R . . 
C7 C 0.5670(5) 0.5709(7) 0.8020(5) 0.022(2) Uani 1 1 d . . . 
C8 C 0.6799(5) 0.6001(7) 0.7801(6) 0.0229(19) Uani 1 1 d . . . 
H8 H 0.6996 0.6590 0.7615 0.027 Uiso 1 1 calc R . . 
C9 C 0.6656(5) 0.6045(7) 0.8659(6) 0.026(2) Uani 1 1 d . . . 
H9 H 0.6751 0.6671 0.8868 0.031 Uiso 1 1 calc R . . 
C10 C 0.7461(5) 0.4875(7) 0.8413(6) 0.022(2) Uani 1 1 d . . . 
C11 C 0.5997(5) 0.5828(7) 0.6686(6) 0.026(2) Uani 1 1 d . . . 
H11A H 0.5546 0.6064 0.6618 0.031 Uiso 1 1 calc R . . 
H11B H 0.6295 0.6268 0.6438 0.031 Uiso 1 1 calc R . . 
C12 C 0.7561(5) 0.4936(7) 0.7017(5) 0.022(2) Uani 1 1 d . . . 
H12A H 0.7645 0.5497 0.6718 0.027 Uiso 1 1 calc R . . 
H12B H 0.7988 0.4640 0.7120 0.027 Uiso 1 1 calc R . . 
C13 C 0.5535(5) 0.4331(7) 0.6273(5) 0.021(2) Uani 1 1 d . . . 
C14 C 0.6452(5) 0.3589(8) 0.5674(6) 0.023(2) Uani 1 1 d . . . 
H14 H 0.6531 0.3559 0.5131 0.028 Uiso 1 1 calc R . . 
C15 C 0.6671(4) 0.4578(7) 0.6016(5) 0.020(2) Uani 1 1 d . . . 
H15 H 0.6869 0.4994 0.5637 0.024 Uiso 1 1 calc R . . 
C16 C 0.7271(4) 0.3338(7) 0.6581(6) 0.021(2) Uani 1 1 d . . . 
C17 C 0.5282(5) 0.2812(7) 0.5693(5) 0.022(2) Uani 1 1 d . . . 
H17A H 0.5403 0.2550 0.5207 0.027 Uiso 1 1 calc R . . 
H17B H 0.4832 0.3059 0.5650 0.027 Uiso 1 1 calc R . . 
C18 C 0.6857(5) 0.1907(7) 0.5932(5) 0.0189(18) Uani 1 1 d . . . 
H18A H 0.7306 0.1673 0.6018 0.023 Uiso 1 1 calc R . . 
H18B H 0.6749 0.1796 0.5408 0.023 Uiso 1 1 calc R . . 
C19 C 0.4891(4) 0.2084(7) 0.6848(5) 0.0187(19) Uani 1 1 d . . . 
C20 C 0.5438(5) 0.0635(7) 0.6902(5) 0.021(2) Uani 1 1 d . . . 
H20 H 0.5242 0.0027 0.6755 0.025 Uiso 1 1 calc R . . 
C21 C 0.5695(5) 0.1194(7) 0.6217(5) 0.020(2) Uani 1 1 d . . . 
H21 H 0.5642 0.0844 0.5745 0.024 Uiso 1 1 calc R . . 
C22 C 0.6585(5) 0.0984(6) 0.7080(5) 0.0186(19) Uani 1 1 d . . . 
C23 C 0.4428(5) 0.0991(6) 0.7766(6) 0.0223(19) Uani 1 1 d . . . 
H23A H 0.4354 0.0316 0.7731 0.027 Uiso 1 1 calc R . . 
H23B H 0.4016 0.1307 0.7629 0.027 Uiso 1 1 calc R . . 
C24 C 0.6007(5) 0.0119(7) 0.8112(6) 0.026(2) Uani 1 1 d . . . 
H24A H 0.6452 -0.0087 0.8249 0.031 Uiso 1 1 calc R . . 
H24B H 0.5723 -0.0436 0.8103 0.031 Uiso 1 1 calc R . . 
C25 C 0.4436(4) 0.2088(7) 0.8858(5) 0.0178(19) Uani 1 1 d . . . 
C26 C 0.5112(5) 0.1308(7) 0.9726(6) 0.022(2) Uani 1 1 d . . . 
H26 H 0.4923 0.0962 1.0154 0.026 Uiso 1 1 calc R . . 
C27 C 0.5087(5) 0.0718(7) 0.8989(6) 0.021(2) Uani 1 1 d . . . 
H27 H 0.4945 0.0066 0.9084 0.026 Uiso 1 1 calc R . . 
C28 C 0.6201(6) 0.1136(9) 0.9234(5) 0.030(3) Uani 1 1 d . . . 
C29 C 0.4574(5) 0.2877(7) 1.0077(5) 0.020(2) Uani 1 1 d . . . 
H29A H 0.4559 0.2597 1.0575 0.024 Uiso 1 1 calc R . . 
H29B H 0.4132 0.3123 0.9969 0.024 Uiso 1 1 calc R . . 
C30 C 0.6125(5) 0.2001(8) 1.0427(5) 0.026(2) Uani 1 1 d . . . 
H30A H 0.6574 0.1764 1.0506 0.032 Uiso 1 1 calc R . . 
H30B H 0.5873 0.1883 1.0883 0.032 Uiso 1 1 calc R . . 
 
loop_ 
 _atom_site_aniso_label 
 _atom_site_aniso_U_11 
 _atom_site_aniso_U_22 
 _atom_site_aniso_U_33 
 _atom_site_aniso_U_23 
 _atom_site_aniso_U_13 
 _atom_site_aniso_U_12 
Gd 0.0147(2) 0.0190(2) 0.01628(19) 0.00094(18) -0.00050(18) -0.00002(16) 
K 0.0187(10) 0.0240(10) 0.0213(9) 0.0025(8) 0.0011(8) 0.0019(8) 
Re1 0.0222(2) 0.0312(2) 0.02544(19) -0.00822(18) 0.00281(16) -0.00421(16) 
Re2 0.0278(2) 0.0290(2) 0.02647(19) -0.00200(18) 0.00464(18) 0.00727(17) 
Re3 0.0788(4) 0.0315(3) 0.0528(3) 0.0100(2) -0.0015(3) 0.0050(3) 
O1 0.013(3) 0.022(3) 0.020(3) 0.003(3) -0.006(3) 0.001(3) 
O2 0.019(4) 0.041(4) 0.020(3) -0.007(3) 0.000(3) 0.006(3) 
O3 0.014(3) 0.026(3) 0.027(4) -0.001(3) 0.002(3) -0.004(3) 
O4 0.023(4) 0.021(4) 0.026(4) -0.001(3) 0.002(3) 0.001(3) 
O5 0.021(3) 0.024(3) 0.016(3) 0.004(3) 0.002(3) -0.001(3) 
O6 0.022(4) 0.020(3) 0.021(3) 0.001(3) -0.001(3) -0.002(3) 
O7 0.020(3) 0.030(4) 0.017(3) 0.002(3) 0.002(3) 0.001(3) 
O8 0.016(4) 0.028(4) 0.024(4) 0.003(3) 0.002(3) 0.000(3) 
O9 0.021(3) 0.015(3) 0.020(3) 0.004(3) -0.002(3) -0.003(3) 
O10 0.012(4) 0.034(4) 0.027(4) -0.002(3) 0.001(3) 0.007(3) 
O11 0.026(4) 0.045(5) 0.031(4) -0.002(3) -0.003(3) 0.004(3) 
O12 0.034(5) 0.078(7) 0.025(4) -0.002(4) -0.004(3) 0.013(4) 
O13 0.032(5) 0.068(6) 0.020(4) -0.005(4) 0.001(3) -0.002(4) 
O14 0.018(3) 0.027(4) 0.013(3) 0.003(3) 0.002(2) 0.000(3) 
O15 0.020(4) 0.024(4) 0.035(4) 0.003(3) 0.009(3) 0.004(3) 
O16 0.014(3) 0.024(4) 0.027(4) -0.004(3) -0.006(3) 0.006(3) 
O17 0.009(3) 0.037(4) 0.023(4) 0.002(3) 0.001(2) 0.007(3) 
O18 0.026(4) 0.036(4) 0.033(4) -0.002(3) -0.002(3) -0.003(3) 
O19 0.025(4) 0.045(5) 0.035(4) -0.013(4) 0.000(3) -0.016(3) 
O20 0.038(5) 0.057(6) 0.054(6) -0.013(5) 0.027(4) 0.005(4) 
O21 0.041(5) 0.031(4) 0.048(5) 0.002(4) -0.007(4) -0.003(4) 
O22 0.036(4) 0.038(4) 0.039(4) 0.005(4) -0.003(4) 0.021(3) 
O23 0.115(9) 0.029(5) 0.046(6) 0.007(4) 0.050(6) 0.014(5) 
O24 0.097(8) 0.027(5) 0.053(6) -0.008(4) 0.045(6) -0.012(5) 
O25 0.052(6) 0.113(8) 0.091(7) -0.033(6) -0.025(5) 0.013(5) 
O26 0.137(9) 0.080(7) 0.096(8) -0.010(6) -0.013(7) 0.006(7) 
O27 0.126(8) 0.065(6) 0.090(7) 0.004(6) 0.011(7) -0.021(6) 
O28 0.063(6) 0.093(7) 0.088(7) 0.036(6) -0.009(6) -0.006(5) 
O29 0.089(10) 0.098(10) 0.094(10) 0.019(8) -0.006(8) 0.023(8) 
O30 0.078(7) 0.047(5) 0.035(5) -0.002(4) 0.013(5) 0.029(5) 
O31 0.035(5) 0.065(6) 0.048(5) 0.007(5) -0.003(4) -0.001(4) 
O32 0.061(7) 0.102(9) 0.040(5) -0.013(6) -0.001(5) 0.017(6) 
O33 0.106(17) 0.019(8) 0.055(12) 0.013(8) 0.002(12) 0.005(9) 
N1 0.018(4) 0.029(5) 0.018(4) 0.009(3) -0.005(3) 0.007(3) 
N2 0.026(4) 0.020(4) 0.022(4) -0.005(3) -0.004(3) -0.004(3) 
N3 0.020(4) 0.027(5) 0.025(4) -0.008(4) 0.007(3) -0.001(4) 
N4 0.017(4) 0.031(5) 0.024(4) 0.005(4) 0.002(4) 0.005(3) 
N5 0.016(4) 0.027(5) 0.030(5) -0.007(4) -0.003(3) -0.001(3) 
N6 0.019(4) 0.022(4) 0.026(4) -0.005(3) 0.003(3) -0.002(3) 
N7 0.018(4) 0.024(4) 0.023(4) -0.003(4) 0.005(3) 0.005(3) 
N8 0.016(4) 0.031(5) 0.021(4) -0.004(3) -0.001(3) 0.001(3) 
N9 0.017(4) 0.034(5) 0.025(4) 0.009(4) 0.004(3) 0.006(4) 
N10 0.017(4) 0.021(4) 0.019(4) 0.002(3) 0.000(3) 0.006(3) 
N11 0.022(4) 0.019(4) 0.017(4) -0.001(3) -0.004(3) 0.001(3) 
N12 0.018(4) 0.027(4) 0.021(4) 0.002(4) -0.003(3) 0.002(3) 
N13 0.024(4) 0.016(4) 0.022(4) 0.000(3) -0.003(3) -0.001(3) 
N14 0.017(4) 0.022(4) 0.013(4) 0.002(3) 0.001(3) 0.001(3) 
N15 0.012(4) 0.026(4) 0.023(4) 0.003(3) 0.004(3) -0.002(3) 
N16 0.028(5) 0.016(4) 0.016(4) 0.005(3) 0.001(3) 0.001(3) 
N17 0.022(4) 0.020(4) 0.019(4) -0.001(3) 0.000(3) 0.000(3) 
N18 0.011(4) 0.027(4) 0.021(4) 0.007(3) 0.000(3) 0.004(3) 
N19 0.015(4) 0.030(5) 0.024(4) -0.002(4) -0.006(3) 0.008(3) 
N20 0.025(5) 0.017(4) 0.025(4) -0.002(3) -0.001(3) -0.002(3) 
N21 0.024(5) 0.022(4) 0.028(5) -0.001(3) -0.001(4) -0.002(4) 
C1 0.028(5) 0.021(5) 0.022(5) -0.008(4) 0.008(4) 0.002(4) 
C2 0.017(5) 0.037(5) 0.011(4) -0.006(4) 0.000(4) 0.000(4) 
C3 0.020(5) 0.040(6) 0.010(4) -0.003(4) -0.002(3) -0.008(4) 
C4 0.028(6) 0.032(6) 0.009(4) 0.000(4) -0.013(4) -0.001(4) 
C5 0.025(5) 0.027(5) 0.022(5) -0.013(4) -0.003(4) 0.000(4) 
C6 0.041(6) 0.020(5) 0.029(5) -0.009(4) -0.010(5) -0.012(5) 
C7 0.022(6) 0.020(5) 0.023(5) -0.006(4) 0.004(4) 0.005(4) 
C8 0.017(5) 0.022(5) 0.030(5) 0.003(4) 0.001(4) -0.009(4) 
C9 0.014(5) 0.024(5) 0.039(6) -0.002(4) 0.005(4) -0.004(4) 
C10 0.016(5) 0.019(5) 0.030(5) -0.009(4) 0.002(4) -0.003(4) 
C11 0.021(5) 0.029(6) 0.028(6) -0.001(4) 0.000(4) 0.007(4) 
C12 0.025(5) 0.028(5) 0.014(4) 0.003(4) -0.001(4) -0.001(4) 
C13 0.020(5) 0.030(5) 0.014(4) 0.003(4) -0.004(3) -0.011(4) 
C14 0.011(5) 0.038(6) 0.020(5) 0.004(4) 0.004(4) -0.001(4) 
C15 0.010(4) 0.037(6) 0.014(4) 0.008(4) 0.005(3) 0.000(4) 
C16 0.020(5) 0.025(5) 0.020(4) 0.004(4) 0.010(5) -0.009(4) 
C17 0.025(5) 0.029(5) 0.012(4) 0.000(4) -0.003(4) -0.003(4) 
C18 0.015(5) 0.023(5) 0.019(4) 0.001(4) 0.002(3) 0.001(4) 
C19 0.008(4) 0.029(5) 0.019(4) -0.001(4) -0.003(3) -0.007(4) 
C20 0.017(5) 0.023(5) 0.023(5) 0.001(4) -0.001(4) -0.002(4) 
C21 0.016(5) 0.023(5) 0.023(5) 0.003(4) -0.002(4) 0.003(4) 
C22 0.018(5) 0.018(5) 0.021(5) -0.005(4) 0.006(4) -0.003(4) 
C23 0.030(5) 0.012(4) 0.024(4) 0.010(4) -0.001(5) -0.005(4) 
C24 0.022(5) 0.023(5) 0.032(5) -0.005(4) 0.003(4) -0.003(4) 
C25 0.006(4) 0.022(5) 0.025(5) -0.001(4) 0.006(3) -0.002(3) 
C26 0.023(5) 0.021(5) 0.021(5) 0.007(4) 0.003(4) 0.004(4) 
C27 0.016(5) 0.024(5) 0.024(5) 0.007(4) 0.001(4) 0.002(4) 
C28 0.037(7) 0.041(7) 0.012(5) 0.006(4) 0.005(4) -0.008(5) 
C29 0.025(5) 0.022(5) 0.012(4) 0.006(3) -0.003(3) 0.002(4) 
C30 0.015(5) 0.045(6) 0.019(5) -0.004(4) 0.000(4) 0.008(4) 
 
_geom_special_details 
; 
 All esds (except the esd in the dihedral angle between two l.s. planes) 
 are estimated using the full covariance matrix.  The cell esds are taken 
 into account individually in the estimation of esds in distances, angles 
 and torsion angles; correlations between esds in cell parameters are only 
 used when they are defined by crystal symmetry.  An approximate (isotropic) 
 treatment of cell esds is used for estimating esds involving l.s. planes. 
;
loop_ 
 _geom_bond_atom_site_label_1 
 _geom_bond_atom_site_label_2 
 _geom_bond_distance 
 _geom_bond_site_symmetry_2 
 _geom_bond_publ_flag 
Gd O15 2.385(7) . ? 
Gd O11 2.397(7) . ? 
Gd O14 2.411(6) . ? 
Gd O7 2.413(7) . ? 
Gd O3 2.428(6) . ? 
Gd O16 2.442(7) . ? 
Gd O5 2.527(6) . ? 
Gd O9 2.559(6) . ? 
Gd O1 2.592(6) . ? 
Gd K 4.284(2) 3_455 ? 
K O6 2.701(7) . ? 
K O12 2.703(8) . ? 
K O4 2.714(7) . ? 
K O10 2.776(7) . ? 
K O2 2.805(7) . ? 
K O14 2.837(7) 3 ? 
K O8 2.894(7) . ? 
K O9 2.937(7) 3 ? 
K O17 3.140(7) . ? 
K Gd 4.284(2) 3 ? 
Re1 O20 1.714(8) . ? 
Re1 O21 1.728(8) . ? 
Re1 O19 1.729(7) . ? 
Re1 O18 1.735(8) . ? 
Re2 O22 1.695(7) . ? 
Re2 O23 1.710(9) . ? 
Re2 O24 1.719(8) . ? 
Re2 O25 1.721(11) . ? 
Re3 O29 1.60(2) . ? 
Re3 O27 1.648(13) . ? 
Re3 O28 1.676(12) . ? 
Re3 O26 1.839(16) . ? 
O1 C1 1.236(12) . ? 
O2 C4 1.210(13) . ? 
O3 C7 1.242(12) . ? 
O4 C10 1.216(12) . ? 
O5 C13 1.242(12) . ? 
O6 C16 1.235(12) . ? 
O7 C19 1.234(12) . ? 
O8 C22 1.197(12) . ? 
O9 C25 1.229(12) . ? 
O9 K 2.937(7) 3_455 ? 
O10 C28 1.214(13) . ? 
O11 N21 1.194(12) . ? 
O12 N21 1.269(12) . ? 
O13 N21 1.236(11) . ? 
O14 K 2.837(7) 3_455 ? 
O14 H14A 0.8052 . ?  
O14 H14B 0.9201 . ? 
O15 H15A 0.8632 . ? 
O15 H15B 0.8010 . ? 
O16 H16A 0.8946 . ? 
O16 H16B 0.9341 . ? 
O32 H32A 0.8233 . ? 
O32 H32B 0.8668 . ? 
N1 C1 1.395(13) . ? 
N1 C29 1.441(13) . ? 
N1 C3 1.442(12) . ? 
N2 C1 1.327(13) . ? 
N2 C5 1.440(14) . ? 
N2 C2 1.470(12) . ? 
N3 C4 1.404(14) . ? 
N3 C6 1.433(14) . ? 
N3 C2 1.436(12) . ? 
N4 C4 1.364(14) . ? 
N4 C30 1.448(14) . ? 
N4 C3 1.462(13) . ? 
N5 C7 1.349(13) . ? 
N5 C5 1.430(13) . ? 
N5 C9 1.463(13) . ? 
N6 C7 1.356(13) . ? 
N6 C8 1.441(13) . ? 
N6 C11 1.456(13) . ? 
N7 C10 1.368(14) . ? 
N7 C8 1.441(12) . ? 
N7 C12 1.468(12) . ? 
N8 C10 1.373(13) . ? 
N8 C6 1.444(14) . ? 
N8 C9 1.456(13) . ? 
N9 C13 1.362(13) . ? 
N9 C11 1.389(14) . ? 
N9 C15 1.471(12) . ? 
N10 C13 1.354(13) . ? 
N10 C17 1.422(13) . ? 
N10 C14 1.501(12) . ? 
N11 C16 1.373(13) . ? 
N11 C14 1.424(13) . ? 
N11 C18 1.455(12) . ? 
N12 C16 1.368(12) . ? 
N12 C12 1.444(13) . ? 
N12 C15 1.461(12) . ? 
N13 C19 1.336(12) . ? 
N13 C17 1.440(12) . ? 
N13 C21 1.481(12) . ? 
N14 C19 1.362(12) . ? 
N14 C23 1.448(12) . ? 
N14 C20 1.456(12) . ? 
N15 C22 1.399(12) . ? 
N15 C24 1.429(13) . ? 
N15 C20 1.460(13) . ? 
N16 C22 1.380(13) . ? 
N16 C18 1.456(12) . ? 
N16 C21 1.464(12) . ? 
N17 C25 1.376(12) . ? 
N17 C23 1.457(14) . ? 
N17 C27 1.459(12) . ? 
N18 C25 1.350(12) . ? 
N18 C29 1.432(12) . ? 
N18 C26 1.460(12) . ? 
N19 C28 1.371(14) . ? 
N19 C30 1.447(13) . ? 
N19 C26 1.454(13) . ? 
N20 C28 1.409(14) . ? 
N20 C24 1.453(13) . ? 
N20 C27 1.458(13) . ? 
C2 C3 1.545(14) . ? 
C2 H2 0.9800 . ? 
C3 H3 0.9800 . ? 
C5 H5A 0.9700 . ? 
C5 H5B 0.9700 . ? 
C6 H6A 0.9700 . ? 
C6 H6B 0.9700 . ? 
C8 C9 1.553(15) . ? 
C8 H8 0.9800 . ? 
C9 H9 0.9800 . ? 
C11 H11A 0.9700 . ? 
C11 H11B 0.9700 . ? 
C12 H12A 0.9700 . ? 
C12 H12B 0.9700 . ? 
C14 C15 1.587(15) . ? 
C14 H14 0.9800 . ? 
C15 H15 0.9800 . ? 
C17 H17A 0.9700 . ? 
C17 H17B 0.9700 . ? 
C18 H18A 0.9700 . ? 
C18 H18B 0.9700 . ? 
C20 C21 1.541(13) . ? 
C20 H20 0.9800 . ? 
C21 H21 0.9800 . ? 
C23 H23A 0.9700 . ? 
C23 H23B 0.9700 . ? 
C24 H24A 0.9700 . ? 
C24 H24B 0.9700 . ? 
C26 C27 1.555(14) . ? 
C26 H26 0.9800 . ? 
C27 H27 0.9800 . ? 
C29 H29A 0.9700 . ? 
C29 H29B 0.9700 . ? 
C30 H30A 0.9700 . ? 
C30 H30B 0.9700 . ? 
 
loop_ 
 _geom_angle_atom_site_label_1 
 _geom_angle_atom_site_label_2 
 _geom_angle_atom_site_label_3 
 _geom_angle 
 _geom_angle_site_symmetry_1 
 _geom_angle_site_symmetry_3 
 _geom_angle_publ_flag 
O15 Gd O11 141.6(3) . . ? 
O15 Gd O14 73.5(2) . . ? 
O11 Gd O14 125.0(2) . . ? 
O15 Gd O7 123.1(2) . . ? 
O11 Gd O7 80.9(2) . . ? 
O14 Gd O7 117.8(2) . . ? 
O15 Gd O3 66.6(2) . . ? 
O11 Gd O3 75.1(2) . . ? 
O14 Gd O3 110.8(2) . . ? 
O7 Gd O3 131.2(2) . . ? 
O15 Gd O16 67.6(2) . . ? 
O11 Gd O16 146.0(2) . . ? 
O14 Gd O16 71.6(2) . . ? 
O7 Gd O16 65.4(2) . . ? 
O3 Gd O16 130.7(2) . . ? 
O15 Gd O5 75.4(2) . . ? 
O11 Gd O5 89.7(2) . . ? 
O14 Gd O5 144.9(2) . . ? 
O7 Gd O5 68.0(2) . . ? 
O3 Gd O5 70.1(2) . . ? 
O16 Gd O5 81.9(2) . . ? 
O15 Gd O9 139.9(2) . . ? 
O11 Gd O9 72.8(2) . . ? 
O14 Gd O9 67.5(2) . . ? 
O7 Gd O9 70.7(2) . . ? 
O3 Gd O9 136.6(2) . . ? 
O16 Gd O9 91.3(2) . . ? 
O5 Gd O9 137.1(2) . . ? 
O15 Gd O1 101.4(2) . . ? 
O11 Gd O1 66.9(2) . . ? 
O14 Gd O1 64.7(2) . . ? 
O7 Gd O1 134.8(2) . . ? 
O3 Gd O1 70.9(2) . . ? 
O16 Gd O1 136.2(2) . . ? 
O5 Gd O1 138.5(2) . . ? 
O9 Gd O1 70.0(2) . . ? 
O6 K O12 90.9(2) . . ? 
O6 K O4 76.7(2) . . ? 
O12 K O4 78.4(3) . . ? 
O6 K O10 131.9(2) . . ? 
O12 K O10 69.9(3) . . ? 
O4 K O10 136.1(2) . . ? 
O6 K O2 140.9(2) . . ? 
O12 K O2 62.8(2) . . ? 
O4 K O2 70.3(2) . . ? 
O10 K O2 68.4(2) . . ? 
O6 K O14 103.4(2) . 3 ? 
O12 K O14 142.4(3) . 3 ? 
O4 K O14 138.4(2) . 3 ? 
O10 K O14 74.8(2) . 3 ? 
O2 K O14 115.1(2) . 3 ? 
O6 K O8 65.5(2) . . ? 
O12 K O8 89.2(2) . . ? 
O4 K O8 139.9(2) . . ? 
O10 K O8 70.4(2) . . ? 
O2 K O8 136.0(2) . . ? 
O14 K O8 66.63(19) 3 . ? 
O6 K O9 92.3(2) . 3 ? 
O12 K O9 158.1(3) . 3 ? 
O4 K O9 81.28(19) . 3 ? 
O10 K O9 121.8(2) . 3 ? 
O2 K O9 102.5(2) . 3 ? 
O14 K O9 57.16(18) 3 3 ? 
O8 K O9 111.78(19) . 3 ? 
O6 K O17 158.6(2) . . ? 
O12 K O17 109.4(2) . . ? 
O4 K O17 113.3(2) . . ? 
O10 K O17 54.38(19) . . ? 
O2 K O17 58.9(2) . . ? 
O14 K O17 56.24(18) 3 . ? 
O8 K O17 106.8(2) . . ? 
O9 K O17 71.47(17) 3 . ? 
O20 Re1 O21 109.6(5) . . ? 
O20 Re1 O19 111.0(4) . . ? 
O21 Re1 O19 108.6(4) . . ? 
O20 Re1 O18 108.7(4) . . ? 
O21 Re1 O18 110.3(4) . . ? 
O19 Re1 O18 108.7(4) . . ? 
O22 Re2 O23 111.5(5) . . ? 
O22 Re2 O24 111.5(5) . . ? 
O23 Re2 O24 106.9(4) . . ? 
O22 Re2 O25 109.9(5) . . ? 
O23 Re2 O25 110.3(7) . . ? 
O24 Re2 O25 106.6(7) . . ? 
O29 Re3 O27 114.0(11) . . ? 
O29 Re3 O28 116.2(10) . . ? 
O27 Re3 O28 116.2(7) . . ? 
O29 Re3 O26 98.8(11) . . ? 
O27 Re3 O26 105.8(7) . . ? 
O28 Re3 O26 102.8(7) . . ? 
C1 O1 Gd 133.5(6) . . ? 
C4 O2 K 127.5(6) . . ? 
C7 O3 Gd 137.7(6) . . ? 
C10 O4 K 123.4(6) . . ? 
C13 O5 Gd 136.1(6) . . ? 
C16 O6 K 129.2(6) . . ? 
C19 O7 Gd 143.9(6) . . ? 
C22 O8 K 127.5(6) . . ? 
C25 O9 Gd 132.1(6) . . ? 
C25 O9 K 125.0(5) . 3_455 ? 
Gd O9 K 102.2(2) . 3_455 ? 
C28 O10 K 128.9(7) . . ? 
N21 O11 Gd 139.0(7) . . ? 
N21 O12 K 133.0(6) . . ? 
Gd O14 K 109.2(2) . 3_455 ? 
Gd O14 H14A 109.7 . . ? 
K O14 H14A 88.2 3_455 . ? 
Gd O14 H14B 116.6 . . ? 
K O14 H14B 121.8 3_455 . ? 
H14A O14 H14B 107.2 . . ? 
Gd O15 H15A 131.0 . . ? 
Gd O15 H15B 111.2 . . ? 
H15A O15 H15B 117.7 . . ? 
Gd O16 H16A 125.2 . . ? 
Gd O16 H16B 111.3 . . ? 
H16A O16 H16B 93.5 . . ? 
H32A O32 H32B 112.8 . . ? 
C1 N1 C29 122.6(8) . . ? 
C1 N1 C3 111.7(8) . . ? 
C29 N1 C3 125.5(8) . . ? 
C1 N2 C5 120.3(9) . . ? 
C1 N2 C2 114.1(8) . . ? 
C5 N2 C2 123.7(8) . . ? 
C4 N3 C6 121.1(9) . . ? 
C4 N3 C2 111.2(8) . . ? 
C6 N3 C2 126.1(9) . . ? 
C4 N4 C30 121.8(8) . . ? 
C4 N4 C3 113.0(8) . . ? 
C30 N4 C3 125.2(8) . . ? 
C7 N5 C5 121.9(8) . . ? 
C7 N5 C9 111.7(9) . . ? 
C5 N5 C9 124.9(8) . . ? 
C7 N6 C8 112.9(8) . . ? 
C7 N6 C11 122.5(9) . . ? 
C8 N6 C11 124.6(8) . . ? 
C10 N7 C8 112.9(8) . . ? 
C10 N7 C12 122.8(7) . . ? 
C8 N7 C12 123.3(8) . . ? 
C10 N8 C6 124.1(9) . . ? 
C10 N8 C9 112.5(8) . . ? 
C6 N8 C9 123.0(8) . . ? 
C13 N9 C11 123.7(9) . . ? 
C13 N9 C15 111.9(9) . . ? 
C11 N9 C15 124.0(9) . . ? 
C13 N10 C17 122.8(8) . . ? 
C13 N10 C14 112.1(8) . . ? 
C17 N10 C14 124.8(8) . . ? 
C16 N11 C14 112.6(8) . . ? 
C16 N11 C18 121.9(8) . . ? 
C14 N11 C18 125.3(8) . . ? 
C16 N12 C12 122.1(8) . . ? 
C16 N12 C15 112.5(8) . . ? 
C12 N12 C15 124.5(8) . . ? 
C19 N13 C17 121.9(8) . . ? 
C19 N13 C21 111.7(8) . . ? 
C17 N13 C21 126.4(8) . . ? 
C19 N14 C23 119.8(8) . . ? 
C19 N14 C20 111.3(7) . . ? 
C23 N14 C20 126.2(7) . . ? 
C22 N15 C24 123.5(8) . . ? 
C22 N15 C20 112.3(8) . . ? 
C24 N15 C20 123.2(8) . . ? 
C22 N16 C18 122.1(8) . . ? 
C22 N16 C21 113.0(8) . . ? 
C18 N16 C21 124.9(7) . . ? 
C25 N17 C23 122.7(8) . . ? 
C25 N17 C27 111.9(8) . . ? 
C23 N17 C27 123.9(8) . . ? 
C25 N18 C29 123.7(8) . . ? 
C25 N18 C26 112.1(8) . . ? 
C29 N18 C26 123.4(8) . . ? 
C28 N19 C30 121.0(9) . . ? 
C28 N19 C26 113.6(8) . . ? 
C30 N19 C26 125.2(8) . . ? 
C28 N20 C24 120.8(9) . . ? 
C28 N20 C27 110.1(8) . . ? 
C24 N20 C27 123.0(8) . . ? 
O11 N21 O13 121.3(9) . . ? 
O11 N21 O12 119.7(9) . . ? 
O13 N21 O12 119.0(9) . . ? 
O1 C1 N2 129.1(10) . . ? 
O1 C1 N1 123.3(9) . . ? 
N2 C1 N1 107.5(9) . . ? 
N3 C2 N2 115.6(8) . . ? 
N3 C2 C3 105.1(8) . . ? 
N2 C2 C3 101.5(7) . . ? 
N3 C2 H2 111.3 . . ? 
N2 C2 H2 111.3 . . ? 
C3 C2 H2 111.3 . . ? 
N1 C3 N4 115.9(8) . . ? 
N1 C3 C2 104.3(8) . . ? 
N4 C3 C2 102.5(7) . . ? 
N1 C3 H3 111.2 . . ? 
N4 C3 H3 111.2 . . ? 
C2 C3 H3 111.2 . . ? 
O2 C4 N4 128.4(10) . . ? 
O2 C4 N3 123.7(10) . . ? 
N4 C4 N3 107.8(9) . . ? 
N5 C5 N2 116.2(8) . . ? 
N5 C5 H5A 108.2 . . ? 
N2 C5 H5A 108.2 . . ? 
N5 C5 H5B 108.2 . . ? 
N2 C5 H5B 108.2 . . ? 
H5A C5 H5B 107.4 . . ? 
N3 C6 N8 115.1(8) . . ? 
N3 C6 H6A 108.5 . . ? 
N8 C6 H6A 108.5 . . ? 
N3 C6 H6B 108.5 . . ? 
N8 C6 H6B 108.5 . . ? 
H6A C6 H6B 107.5 . . ? 
O3 C7 N5 126.3(9) . . ? 
O3 C7 N6 124.4(9) . . ? 
N5 C7 N6 109.3(9) . . ? 
N7 C8 N6 114.6(8) . . ? 
N7 C8 C9 103.4(8) . . ? 
N6 C8 C9 102.6(8) . . ? 
N7 C8 H8 111.8 . . ? 
N6 C8 H8 111.8 . . ? 
C9 C8 H8 111.8 . . ? 
N8 C9 N5 114.8(8) . . ? 
N8 C9 C8 102.9(8) . . ? 
N5 C9 C8 103.2(8) . . ? 
N8 C9 H9 111.8 . . ? 
N5 C9 H9 111.8 . . ? 
C8 C9 H9 111.8 . . ? 
O4 C10 N7 126.1(9) . . ? 
O4 C10 N8 126.0(10) . . ? 
N7 C10 N8 107.8(8) . . ? 
N9 C11 N6 116.6(9) . . ? 
N9 C11 H11A 108.1 . . ? 
N6 C11 H11A 108.1 . . ? 
N9 C11 H11B 108.1 . . ? 
N6 C11 H11B 108.1 . . ? 
H11A C11 H11B 107.3 . . ? 
N12 C12 N7 113.0(8) . . ? 
N12 C12 H12A 109.0 . . ? 
N7 C12 H12A 109.0 . . ? 
N12 C12 H12B 109.0 . . ? 
N7 C12 H12B 109.0 . . ? 
H12A C12 H12B 107.8 . . ? 
O5 C13 N10 125.2(9) . . ? 
O5 C13 N9 124.3(9) . . ? 
N10 C13 N9 110.3(9) . . ? 
N11 C14 N10 115.3(8) . . ? 
N11 C14 C15 104.0(8) . . ? 
N10 C14 C15 101.5(7) . . ? 
N11 C14 H14 111.8 . . ? 
N10 C14 H14 111.8 . . ? 
C15 C14 H14 111.8 . . ? 
N12 C15 N9 114.2(8) . . ? 
N12 C15 C14 101.8(7) . . ? 
N9 C15 C14 103.4(8) . . ? 
N12 C15 H15 112.2 . . ? 
N9 C15 H15 112.2 . . ? 
C14 C15 H15 112.2 . . ? 
O6 C16 N12 124.9(9) . . ? 
O6 C16 N11 126.2(9) . . ? 
N12 C16 N11 108.9(8) . . ? 
N10 C17 N13 115.1(8) . . ? 
N10 C17 H17A 108.5 . . ? 
N13 C17 H17A 108.5 . . ? 
N10 C17 H17B 108.5 . . ? 
N13 C17 H17B 108.5 . . ? 
H17A C17 H17B 107.5 . . ? 
N11 C18 N16 114.0(7) . . ? 
N11 C18 H18A 108.8 . . ? 
N16 C18 H18A 108.8 . . ? 
N11 C18 H18B 108.8 . . ? 
N16 C18 H18B 108.8 . . ? 
H18A C18 H18B 107.6 . . ? 
O7 C19 N13 125.1(9) . . ? 
O7 C19 N14 124.5(8) . . ? 
N13 C19 N14 110.2(8) . . ? 
N14 C20 N15 112.4(8) . . ? 
N14 C20 C21 103.9(8) . . ? 
N15 C20 C21 103.9(7) . . ? 
N14 C20 H20 112.0 . . ? 
N15 C20 H20 112.0 . . ? 
C21 C20 H20 112.0 . . ? 
N16 C21 N13 113.0(8) . . ? 
N16 C21 C20 103.6(7) . . ? 
N13 C21 C20 102.5(8) . . ? 
N16 C21 H21 112.3 . . ? 
N13 C21 H21 112.3 . . ? 
C20 C21 H21 112.3 . . ? 
O8 C22 N16 127.3(9) . . ? 
O8 C22 N15 125.5(9) . . ? 
N16 C22 N15 107.1(8) . . ? 
N14 C23 N17 111.9(8) . . ? 
N14 C23 H23A 109.2 . . ? 
N17 C23 H23A 109.2 . . ? 
N14 C23 H23B 109.2 . . ? 
N17 C23 H23B 109.2 . . ? 
H23A C23 H23B 107.9 . . ? 
N15 C24 N20 114.5(8) . . ? 
N15 C24 H24A 108.6 . . ? 
N20 C24 H24A 108.6 . . ? 
N15 C24 H24B 108.6 . . ? 
N20 C24 H24B 108.6 . . ? 
H24A C24 H24B 107.6 . . ? 
O9 C25 N18 126.0(9) . . ? 
O9 C25 N17 124.9(9) . . ? 
N18 C25 N17 109.1(8) . . ? 
N19 C26 N18 114.9(8) . . ? 
N19 C26 C27 102.3(7) . . ? 
N18 C26 C27 103.5(7) . . ? 
N19 C26 H26 111.8 . . ? 
N18 C26 H26 111.8 . . ? 
C27 C26 H26 111.8 . . ? 
N20 C27 N17 113.7(8) . . ? 
N20 C27 C26 104.8(8) . . ? 
N17 C27 C26 102.4(7) . . ? 
N20 C27 H27 111.8 . . ? 
N17 C27 H27 111.8 . . ? 
C26 C27 H27 111.8 . . ? 
O10 C28 N19 129.2(10) . . ? 
O10 C28 N20 122.8(9) . . ? 
N19 C28 N20 108.0(9) . . ? 
N18 C29 N1 115.2(8) . . ? 
N18 C29 H29A 108.5 . . ? 
N1 C29 H29A 108.5 . . ? 
N18 C29 H29B 108.5 . . ? 
N1 C29 H29B 108.5 . . ? 
H29A C29 H29B 107.5 . . ? 
N19 C30 N4 115.3(8) . . ? 
N19 C30 H30A 108.4 . . ? 
N4 C30 H30A 108.4 . . ? 
N19 C30 H30B 108.4 . . ? 
N4 C30 H30B 108.4 . . ? 
H30A C30 H30B 107.5 . . ? 
 
loop_ 
 _geom_hbond_atom_site_label_D 
 _geom_hbond_atom_site_label_H 
 _geom_hbond_atom_site_label_A 
 _geom_hbond_distance_DH 
 _geom_hbond_distance_HA 
 _geom_hbond_distance_DA 
 _geom_hbond_angle_DHA 
 _geom_hbond_site_symmetry_A 
O14 H14A O17  0.81 2.14 2.829(9) 144.3 3_455 
O14 H14B O30  0.92 1.77 2.659(10) 162.5 . 
O15 H15A O22  0.86 1.96 2.783(10) 159.2 . 
O15 H15B O26  0.80 1.95 2.642(17) 143.8 . 
O16 H16A O6  0.89 2.25 2.896(10) 129.2 3_455 
O16 H16B O8  0.93 1.89 2.777(9) 157.8 3_455 
O32 H32A O26  0.82 2.04 2.82(2) 157.4 . 
O32 H32B O33  0.87 2.18 2.94(2) 145.4 1_565 

#===END

data_5
 
_audit_creation_method            SHELXL-97 
_chemical_name_systematic         ?
_chemical_name_common             ? 
_chemical_melting_point           ? 
_chemical_formula_moiety          ? 
_chemical_formula_sum             'C30 H40 N20 O27 Re3 Yb' 
_chemical_formula_weight          1844.46 
 
loop_ 
 _atom_type_symbol 
 _atom_type_description 
 _atom_type_scat_dispersion_real 
 _atom_type_scat_dispersion_imag 
 _atom_type_scat_source 
 'C'  'C'   0.0033   0.0016 
 'International Tables Vol C Tables 4.2.6.8 and 6.1.1.4' 
 'H'  'H'   0.0000   0.0000 
 'International Tables Vol C Tables 4.2.6.8 and 6.1.1.4' 
 'N'  'N'   0.0061   0.0033 
 'International Tables Vol C Tables 4.2.6.8 and 6.1.1.4' 
 'O'  'O'   0.0106   0.0060 
 'International Tables Vol C Tables 4.2.6.8 and 6.1.1.4' 
 'Yb'  'Yb'  -0.3850   5.5486 
 'International Tables Vol C Tables 4.2.6.8 and 6.1.1.4' 
 'Re'  'Re'  -1.0185   7.2310 
 'International Tables Vol C Tables 4.2.6.8 and 6.1.1.4' 
 
_symmetry_cell_setting            triclinic
_symmetry_space_group_name_H-M    'P -1'
 
loop_ 
 _symmetry_equiv_pos_as_xyz 
 'x, y, z' 
 '-x, -y, -z' 
 
_cell_length_a                    13.6207(13) 
_cell_length_b                    19.3081(14) 
_cell_length_c                    20.788(2) 
_cell_angle_alpha                 107.076(6) 
_cell_angle_beta                  93.389(5) 
_cell_angle_gamma                 90.370(6) 
_cell_volume                      5215.3(8) 
_cell_formula_units_Z             4 
_cell_measurement_temperature     100(2) 
_cell_measurement_reflns_used     148272
_cell_measurement_theta_min       2.92
_cell_measurement_theta_max       25.68
 
_exptl_crystal_description        needle
_exptl_crystal_colour             colourless
_exptl_crystal_size_max           0.18
_exptl_crystal_size_mid           0.05
_exptl_crystal_size_min           0.03
_exptl_crystal_density_meas       ? 
_exptl_crystal_density_diffrn     2.349 
_exptl_crystal_density_method     'not measured' 
_exptl_crystal_F_000              3484 
_exptl_absorpt_coefficient_mu     8.823 
_exptl_absorpt_correction_type    'multi-scan'
_exptl_absorpt_correction_T_min   0.446
_exptl_absorpt_correction_T_max   0.767
_exptl_absorpt_process_details    
'SCALEPACK (Otwinowski & Minor, 1997)'  
_exptl_special_details
'crystal-to-detector distance 40 mm'
_diffrn_ambient_temperature       100(2)
_diffrn_radiation_wavelength      0.71073 
_diffrn_radiation_type            MoK\a 
_diffrn_radiation_source          'fine-focus sealed tube' 
_diffrn_radiation_monochromator   graphite 
_diffrn_measurement_device_type   
'Nonius Kappa-CCD area-detector diffractometer'  
_diffrn_measurement_method        
'two \f and seven \w scans with 2\% steps (581 frames)' 
_diffrn_standards_interval_time   0
_diffrn_standards_number          0
_diffrn_standards_decay_%         0
_diffrn_reflns_number             148272
_diffrn_reflns_av_R_equivalents   0.0930 
_diffrn_reflns_av_sigmaI/netI     0.1297 
_diffrn_reflns_limit_h_min        -16 
_diffrn_reflns_limit_h_max        16 
_diffrn_reflns_limit_k_min        -23 
_diffrn_reflns_limit_k_max        23 
_diffrn_reflns_limit_l_min        -25 
_diffrn_reflns_limit_l_max        25 
_diffrn_reflns_theta_min          2.92 
_diffrn_reflns_theta_max          25.68 
_reflns_number_total              19721 
_reflns_number_gt                 11750 
_reflns_threshold_expression      >2sigma(I) 
 
_computing_data_collection        'COLLECT (Nonius, 1998)'
_computing_cell_refinement        'HKL2000 (Otwinowski & Minor, 1997)'
_computing_data_reduction         'HKL2000 (Otwinowski & Minor, 1997)'
_computing_structure_solution     'SHELXS-97 (Sheldrick, 2008)' 
_computing_structure_refinement   'SHELXL-97 (Sheldrick, 2008)' 
_computing_molecular_graphics     'SHELXTL (Sheldrick, 2008)' 
_computing_publication_material   
'SHELXTL (Sheldrick, 2008); PLATON (Spek, 2003)' 
 
_refine_special_details 
;
 Structure solved by direct methods and subsequent Fourier-difference
 synthesis. All non-hydrogen atoms were refined with anisotropic
 displacement parameters, with restraints for some badly behaving atoms,
 particularly in the counter-ions. The perrhenate ions containing Re5A and
 Re5B have been given 0.5 occupancy factors in order to retain acceptable
 displacement parameters and to account for their positions too close to 
 one another. They have also been refined with restraints on bond lengths
 and angles. The O atoms of the perrhenate ion containing Re6 could not be
 found, nor even approximate starting positions for subsequent restrained
 refinement, which likely indicates important rotational disorder. The 
 highest residual electron density peaks are located near the Re atoms.
 The H atoms bound to O atoms were not found and all the others were 
 introduced at calculated positions and were treated as riding atoms with 
 an isotropic displacement parameter equal to 1.2 times that of the 
 parent atom. Some voids in the lattice likely indicate the presence of 
 other, unresolved solvent molecules. 
 Refinement of F^2^ against ALL reflections.  The weighted R-factor wR and 
 goodness of fit S are based on F^2^, conventional R-factors R are based 
 on F, with F set to zero for negative F^2^. The threshold expression of 
 F^2^ > 2sigma(F^2^) is used only for calculating R-factors(gt) etc. and is 
 not relevant to the choice of reflections for refinement.  R-factors based 
 on F^2^ are statistically about twice as large as those based on F, and R- 
 factors based on ALL data will be even larger. 
;
_refine_ls_structure_factor_coef  Fsqd  
_refine_ls_matrix_type            full 
_refine_ls_weighting_scheme       calc  
_refine_ls_weighting_details 
 'calc w=1/[\s^2^(Fo^2^)+(0.1588P)^2^+39.0299P] where P=(Fo^2^+2Fc^2^)/3' 
_atom_sites_solution_primary      direct 
_atom_sites_solution_secondary    difmap 
_atom_sites_solution_hydrogens    geom 
_refine_ls_hydrogen_treatment     constr 
_refine_ls_extinction_method      none 
_refine_ls_extinction_coef        ? 
_refine_ls_number_reflns          19721 
_refine_ls_number_parameters      1477 
_refine_ls_number_restraints      128
_refine_ls_R_factor_all           0.1401 
_refine_ls_R_factor_gt            0.0944 
_refine_ls_wR_factor_ref          0.2861 
_refine_ls_wR_factor_gt           0.2650 
_refine_ls_goodness_of_fit_ref    1.037 
_refine_ls_restrained_S_all       1.049 
_refine_ls_shift/su_max           0.002
_refine_ls_shift/su_mean          0.000 
_diffrn_measured_fraction_theta_max    0.995 
_diffrn_reflns_theta_full              25.68 
_diffrn_measured_fraction_theta_full   0.995 
_refine_diff_density_max    3.504 
_refine_diff_density_min   -3.600 
_refine_diff_density_rms    0.301 
 
loop_ 
 _atom_site_label 
 _atom_site_type_symbol 
 _atom_site_fract_x 
 _atom_site_fract_y 
 _atom_site_fract_z 
 _atom_site_U_iso_or_equiv 
 _atom_site_adp_type 
 _atom_site_occupancy 
 _atom_site_symmetry_multiplicity 
 _atom_site_calc_flag 
 _atom_site_refinement_flags 
 _atom_site_disorder_assembly 
 _atom_site_disorder_group 
Yb1 Yb 0.65412(5) 0.36102(4) 0.29193(4) 0.0323(2) Uani 1 1 d . . . 
Yb2 Yb 0.86313(7) 0.83172(4) 0.19496(5) 0.0456(2) Uani 1 1 d . . . 
Re1 Re 0.16778(6) 0.68511(5) 0.07615(5) 0.0526(3) Uani 1 1 d . . . 
Re2 Re 0.28200(7) 0.90355(5) 0.18872(6) 0.0630(3) Uani 1 1 d . . . 
Re3 Re 0.21822(7) 0.67017(7) 0.43282(6) 0.0782(4) Uani 1 1 d . . . 
Re4 Re 0.70169(7) 0.76485(6) 0.64848(5) 0.0687(3) Uani 1 1 d . . . 
Re5A Re 0.74391(15) 0.78011(11) 0.92585(11) 0.0644(5) Uani 0.50 1 d PD . . 
Re5B Re 0.7539(5) 0.6097(5) 0.8402(3) 0.075(2) Uani 0.50 1 d PD . . 
Re6 Re 0.2889(4) 0.4792(3) 0.4188(3) 0.0773(15) Uani 1 1 d . . . 
O1 O 0.6661(9) 0.2771(6) 0.1897(6) 0.038(3) Uani 1 1 d . . . 
O2 O 0.6484(9) -0.0441(6) 0.0428(8) 0.055(4) Uani 1 1 d . . . 
O3 O 0.6072(9) 0.2536(7) 0.3111(6) 0.041(3) Uani 1 1 d . . . 
O4 O 0.5898(9) -0.0689(6) 0.1787(7) 0.048(3) Uani 1 1 d . . . 
O5 O 0.7917(10) 0.2428(6) 0.4044(6) 0.042(3) Uani 1 1 d . . . 
O6 O 0.7840(11) -0.0771(7) 0.2702(8) 0.063(4) Uani 1 1 d . . . 
O7 O 0.9867(8) 0.2577(7) 0.3318(7) 0.048(3) Uani 1 1 d . . . 
O8 O 0.9527(9) -0.0632(6) 0.2011(7) 0.043(3) Uani 1 1 d . . . 
O9 O 0.9079(9) 0.2792(6) 0.1977(7) 0.043(3) Uani 1 1 d . . . 
O10 O 0.8841(9) -0.0479(6) 0.0524(6) 0.042(3) Uani 1 1 d . . . 
O11 O 0.6313(9) 0.4819(6) 0.3502(7) 0.042(3) Uani 1 1 d . . . 
O12 O 0.8148(12) 0.7819(6) 0.4203(9) 0.069(5) Uani 1 1 d . . . 
O13 O 0.7827(9) 0.4230(6) 0.2639(6) 0.039(3) Uani 1 1 d . . . 
O14 O 0.9807(9) 0.7154(6) 0.3176(7) 0.046(3) Uani 1 1 d . . . 
O15 O 0.7141(10) 0.4144(7) 0.1138(6) 0.044(3) Uani 1 1 d . . . 
O16 O 0.9049(9) 0.7104(6) 0.1675(7) 0.042(3) Uani 1 1 d . . . 
O17 O 0.5049(12) 0.4794(8) 0.1062(8) 0.067(5) Uani 1 1 d . . . 
O18 O 0.7167(11) 0.7721(7) 0.1711(8) 0.060(4) Uani 1 1 d . . . 
O19 O 0.4574(10) 0.5232(7) 0.2584(8) 0.056(4) Uani 1 1 d . . . 
O20 O 0.6499(12) 0.8191(7) 0.3265(9) 0.070(5) Uani 1 1 d . . . 
O21 O 0.4869(9) 0.3648(7) 0.3115(7) 0.045(3) Uani 1 1 d . . . 
O22 O 0.5815(9) 0.4102(6) 0.2122(6) 0.034(3) Uani 1 1 d . . . 
O23 O 0.8000(9) 0.3065(7) 0.3086(7) 0.043(3) Uani 1 1 d . . . 
O24 O 0.6702(11) 0.3745(7) 0.4078(7) 0.056(4) Uani 1 1 d . . . 
O25 O 1.0211(12) 0.8221(7) 0.2402(8) 0.065(4) Uani 1 1 d . . . 
O26 O 0.8393(12) 0.7984(7) 0.2897(8) 0.060(4) Uani 1 1 d . . . 
O27 O 0.7687(12) 0.8880(8) 0.1283(9) 0.072(5) Uani 1 1 d . . . 
O28 O 0.9343(12) 0.8111(8) 0.0935(8) 0.063(4) Uani 1 1 d . . . 
O29 O 0.1083(12) 0.7526(9) 0.0544(10) 0.078(5) Uani 1 1 d . . . 
O30 O 0.2769(10) 0.6700(8) 0.0403(7) 0.056(4) Uani 1 1 d . . . 
O31 O 0.1920(13) 0.7109(7) 0.1636(8) 0.068(5) Uani 1 1 d . . . 
O32 O 0.0893(11) 0.6010(9) 0.0482(9) 0.079(5) Uani 1 1 d . . . 
O33 O 0.314(3) 0.847(2) 0.1254(19) 0.107(11) Uani 1 1 d . . . 
O34 O 0.3738(17) 0.9059(14) 0.2508(12) 0.119(7) Uani 1 1 d U . . 
O35 O 0.2837(13) 0.9881(9) 0.1807(10) 0.083(5) Uani 1 1 d U . . 
O36 O 0.1745(14) 0.8889(10) 0.2171(11) 0.094(6) Uani 1 1 d U . . 
O37 O 0.236(2) 0.6463(14) 0.3460(13) 0.086(8) Uani 1 1 d U . . 
O38 O 0.1584(15) 0.6097(11) 0.4602(11) 0.060(5) Uani 1 1 d U . . 
O39 O 0.1491(13) 0.7465(10) 0.4454(9) 0.056(5) Uani 1 1 d U . . 
O40 O 0.3313(10) 0.6896(9) 0.4747(8) 0.067(4) Uani 1 1 d . . . 
O41 O 0.704(2) 0.8520(18) 0.6551(17) 0.161(11) Uani 1 1 d U . . 
O42 O 0.7062(17) 0.7625(15) 0.7239(12) 0.125(8) Uani 1 1 d U . . 
O43 O 0.7937(12) 0.7356(11) 0.6002(8) 0.085(6) Uani 1 1 d . . . 
O44 O 0.5882(11) 0.7236(10) 0.6134(9) 0.079(5) Uani 1 1 d . . . 
O45A O 0.7390(13) 0.8624(6) 0.9054(9) 0.066(5) Uani 0.50 1 d PDU . . 
O46A O 0.8677(9) 0.7595(14) 0.9319(17) 0.082(7) Uani 0.50 1 d PDU . . 
O47A O 0.682(2) 0.7155(10) 0.8672(12) 0.081(7) Uani 0.50 1 d PDU . . 
O48A O 0.698(2) 0.7948(14) 1.0041(9) 0.084(7) Uani 0.50 1 d PDU . . 
O45B O 0.674(3) 0.608(2) 0.7712(15) 0.086(8) Uani 0.50 1 d PDU . . 
O46B O 0.693(4) 0.634(5) 0.9104(15) 0.085(8) Uani 0.50 1 d PDU . . 
O47B O 0.804(6) 0.525(2) 0.827(3) 0.084(10) Uani 0.50 1 d PDU . . 
O48B O 0.848(4) 0.671(4) 0.844(4) 0.083(8) Uani 0.50 1 d PDU . . 
O49 O 0.4426(12) 0.6962(8) 0.9502(9) 0.068(5) Uani 1 1 d . . . 
O50 O 0.3427(15) 0.9376(11) 0.3938(10) 0.096(6) Uani 0.50 1 d PU . . 
O51 O 0.5280(16) 0.8101(12) 0.0614(11) 0.105(6) Uani 0.50 1 d PU . . 
N1 N 0.6940(11) 0.1917(8) 0.0880(8) 0.042(4) Uani 1 1 d . . . 
N2 N 0.5549(10) 0.1853(7) 0.1349(7) 0.033(3) Uani 1 1 d . . . 
N3 N 0.5554(12) 0.0554(8) 0.0811(8) 0.048(4) Uani 1 1 d . . . 
N4 N 0.6834(11) 0.0647(8) 0.0248(7) 0.045(4) Uani 1 1 d . . . 
N5 N 0.4981(11) 0.1648(7) 0.2377(7) 0.036(3) Uani 1 1 d . . . 
N6 N 0.5660(11) 0.1461(8) 0.3322(8) 0.042(4) Uani 1 1 d . . . 
N7 N 0.5561(13) 0.0138(8) 0.2770(9) 0.053(4) Uani 1 1 d . . . 
N8 N 0.5054(11) 0.0347(9) 0.1831(9) 0.048(4) Uani 1 1 d . . . 
N9 N 0.7089(13) 0.1375(8) 0.4072(8) 0.046(4) Uani 1 1 d . . . 
N10 N 0.8688(13) 0.1393(8) 0.4087(8) 0.051(4) Uani 1 1 d . . . 
N11 N 0.8683(14) 0.0093(8) 0.3615(10) 0.059(5) Uani 1 1 d . . . 
N12 N 0.7032(13) 0.0115(8) 0.3486(9) 0.053(4) Uani 1 1 d . . . 
N13 N 1.0122(11) 0.1487(8) 0.3543(8) 0.045(4) Uani 1 1 d . . . 
N14 N 1.0747(10) 0.1663(8) 0.2602(8) 0.039(4) Uani 1 1 d . . . 
N15 N 1.0425(10) 0.0353(8) 0.2046(8) 0.039(4) Uani 1 1 d . . . 
N16 N 1.0081(13) 0.0172(9) 0.2981(8) 0.055(5) Uani 1 1 d . . . 
N17 N 1.0005(10) 0.1766(8) 0.1537(7) 0.036(3) Uani 1 1 d . . . 
N18 N 0.8699(12) 0.1950(8) 0.0922(8) 0.045(4) Uani 1 1 d . . . 
N19 N 0.8619(11) 0.0634(9) 0.0350(8) 0.045(4) Uani 1 1 d . . . 
N20 N 0.9925(11) 0.0489(7) 0.0935(8) 0.043(4) Uani 1 1 d . . . 
N21 N 0.6130(12) 0.5999(9) 0.4107(8) 0.050(4) Uani 1 1 d . . . 
N22 N 0.7577(12) 0.5504(7) 0.4216(7) 0.041(4) Uani 1 1 d . . . 
N23 N 0.8333(12) 0.6680(8) 0.4349(8) 0.047(4) Uani 1 1 d . . . 
N24 N 0.6872(16) 0.7244(9) 0.4499(11) 0.071(6) Uani 1 1 d . . . 
N25 N 0.8878(11) 0.5001(8) 0.3449(8) 0.045(4) Uani 1 1 d . . . 
N26 N 0.9219(11) 0.4759(8) 0.2372(8) 0.047(4) Uani 1 1 d . . . 
N27 N 1.0075(11) 0.5921(8) 0.2613(8) 0.045(4) Uani 1 1 d . . . 
N28 N 0.9630(11) 0.6211(8) 0.3684(8) 0.047(4) Uani 1 1 d . . . 
N29 N 0.8715(10) 0.4679(7) 0.1216(7) 0.030(3) Uani 1 1 d . . . 
N30 N 0.7549(12) 0.5017(8) 0.0625(8) 0.047(4) Uani 1 1 d . . . 
N31 N 0.8334(11) 0.6169(7) 0.0776(7) 0.035(3) Uani 1 1 d . . . 
N32 N 0.9413(12) 0.5915(7) 0.1484(8) 0.047(4) Uani 1 1 d . . . 
N33 N 0.5956(13) 0.5517(9) 0.0598(9) 0.056(5) Uani 1 1 d . . . 
N34 N 0.4696(10) 0.6016(9) 0.1250(8) 0.058(5) Uani 1 1 d . . . 
N35 N 0.5624(11) 0.7149(8) 0.1535(9) 0.048(4) Uani 1 1 d . . . 
N36 N 0.6723(12) 0.6704(9) 0.0801(9) 0.053(4) Uani 1 1 d . . . 
N37 N 0.4326(13) 0.6339(11) 0.2423(5) 0.067(5) Uani 1 1 d . . . 
N38 N 0.4732(13) 0.6275(8) 0.3449(9) 0.057(5) Uani 1 1 d . . . 
N39 N 0.5586(14) 0.7459(10) 0.3690(11) 0.069(6) Uani 1 1 d . . . 
N40 N 0.5114(13) 0.7567(9) 0.2709(11) 0.066(6) Uani 1 1 d . . . 
C1 C 0.6414(12) 0.2241(9) 0.1429(9) 0.033(4) Uani 1 1 d . . . 
C2 C 0.5441(15) 0.1273(10) 0.0745(10) 0.046(5) Uani 1 1 d . . . 
H2 H 0.4839 0.1309 0.0475 0.056 Uiso 1 1 calc R . . 
C3 C 0.6365(13) 0.1355(8) 0.0389(9) 0.036(4) Uani 1 1 d . . . 
H3 H 0.6207 0.1487 -0.0025 0.044 Uiso 1 1 calc R . . 
C4 C 0.6306(13) 0.0135(10) 0.0487(10) 0.043(5) Uani 1 1 d . . . 
C5 C 0.4802(15) 0.1996(10) 0.1854(11) 0.054(6) Uani 1 1 d . . . 
H5A H 0.4777 0.2515 0.2063 0.064 Uiso 1 1 calc R . . 
H5B H 0.4164 0.1832 0.1626 0.064 Uiso 1 1 calc R . . 
C6 C 0.4836(14) 0.0219(10) 0.1118(10) 0.051(5) Uani 1 1 d . . . 
H6A H 0.4192 0.0406 0.1047 0.061 Uiso 1 1 calc R . . 
H6B H 0.4810 -0.0299 0.0897 0.061 Uiso 1 1 calc R . . 
C7 C 0.5615(11) 0.1943(8) 0.2950(9) 0.032(4) Uani 1 1 d . . . 
C8 C 0.5050(14) 0.0823(9) 0.2986(10) 0.047(5) Uani 1 1 d . . . 
H8 H 0.4514 0.0779 0.3267 0.057 Uiso 1 1 calc R . . 
C9 C 0.4626(11) 0.0958(8) 0.2319(9) 0.034(4) Uani 1 1 d . . . 
H9 H 0.3905 0.0930 0.2280 0.041 Uiso 1 1 calc R . . 
C10 C 0.5515(12) -0.0123(8) 0.2031(10) 0.038(4) Uani 1 1 d . . . 
C11 C 0.6054(15) 0.1657(9) 0.4002(8) 0.042(5) Uani 1 1 d . . . 
H11A H 0.5622 0.1466 0.4267 0.051 Uiso 1 1 calc R . . 
H11B H 0.6073 0.2181 0.4183 0.051 Uiso 1 1 calc R . . 
C12 C 0.6035(18) -0.0182(12) 0.3238(13) 0.073(7) Uani 1 1 d . . . 
H12A H 0.6076 -0.0700 0.3025 0.087 Uiso 1 1 calc R . . 
H12B H 0.5633 -0.0114 0.3621 0.087 Uiso 1 1 calc R . . 
C13 C 0.7905(15) 0.1752(11) 0.4053(10) 0.050(5) Uani 1 1 d . . . 
C14 C 0.8419(19) 0.0676(10) 0.4156(12) 0.064(7) Uani 1 1 d . . . 
H14 H 0.8664 0.0623 0.4592 0.077 Uiso 1 1 calc R . . 
C15 C 0.7244(16) 0.0677(10) 0.4085(11) 0.057(6) Uani 1 1 d . . . 
H15 H 0.6951 0.0579 0.4470 0.069 Uiso 1 1 calc R . . 
C16 C 0.7841(18) -0.0253(10) 0.3214(11) 0.058(6) Uani 1 1 d . . . 
C17 C 0.9641(14) 0.1672(11) 0.4181(11) 0.050(5) Uani 1 1 d . . . 
H17A H 1.0013 0.1479 0.4499 0.060 Uiso 1 1 calc R . . 
H17B H 0.9633 0.2195 0.4369 0.060 Uiso 1 1 calc R . . 
C18 C 0.9633(16) -0.0181(10) 0.3487(11) 0.053(5) Uani 1 1 d . . . 
H18A H 0.9595 -0.0704 0.3296 0.064 Uiso 1 1 calc R . . 
H18B H 1.0045 -0.0064 0.3903 0.064 Uiso 1 1 calc R . . 
C19 C 1.0197(14) 0.1953(10) 0.3148(12) 0.050(5) Uani 1 1 d . . . 
C20 C 1.0991(13) 0.0927(8) 0.2566(11) 0.045(5) Uani 1 1 d . . . 
H20 H 1.1699 0.0857 0.2526 0.054 Uiso 1 1 calc R . . 
C21 C 1.0676(13) 0.0838(9) 0.3250(11) 0.044(5) Uani 1 1 d . . . 
H21 H 1.1238 0.0783 0.3546 0.052 Uiso 1 1 calc R . . 
C22 C 0.9950(13) -0.0074(10) 0.2328(11) 0.046(5) Uani 1 1 d . . . 
C23 C 1.0815(12) 0.2000(10) 0.2070(10) 0.046(5) Uani 1 1 d . . . 
H23A H 1.1439 0.1881 0.1868 0.055 Uiso 1 1 calc R . . 
H23B H 1.0804 0.2522 0.2264 0.055 Uiso 1 1 calc R . . 
C24 C 1.0612(14) 0.0172(9) 0.1332(11) 0.053(6) Uani 1 1 d . . . 
H24A H 1.0581 -0.0351 0.1141 0.064 Uiso 1 1 calc R . . 
H24B H 1.1274 0.0335 0.1292 0.064 Uiso 1 1 calc R . . 
C25 C 0.9245(13) 0.2220(10) 0.1531(9) 0.041(4) Uani 1 1 d . . . 
C26 C 0.9135(14) 0.1311(12) 0.0470(11) 0.054(5) Uani 1 1 d . . . 
H26 H 0.9311 0.1396 0.0049 0.065 Uiso 1 1 calc R . . 
C27 C 1.0084(14) 0.1237(10) 0.0930(10) 0.050(5) Uani 1 1 d . . . 
H27 H 1.0694 0.1296 0.0722 0.060 Uiso 1 1 calc R . . 
C28 C 0.9076(14) 0.0177(10) 0.0616(9) 0.043(5) Uani 1 1 d . . . 
C29 C 0.7806(13) 0.2293(9) 0.0744(11) 0.043(5) Uani 1 1 d . . . 
H29A H 0.7812 0.2799 0.1008 0.052 Uiso 1 1 calc R . . 
H29B H 0.7785 0.2268 0.0271 0.052 Uiso 1 1 calc R . . 
C30 C 0.7727(14) 0.0449(12) -0.0080(11) 0.054(5) Uani 1 1 d . . . 
H30A H 0.7757 0.0682 -0.0434 0.065 Uiso 1 1 calc R . . 
H30B H 0.7705 -0.0070 -0.0294 0.065 Uiso 1 1 calc R . . 
C31 C 0.6677(12) 0.5386(8) 0.3895(8) 0.031(4) Uani 1 1 d . . . 
C32 C 0.7741(17) 0.6240(11) 0.4654(11) 0.062(6) Uani 1 1 d . . . 
H32 H 0.7980 0.6264 0.5114 0.075 Uiso 1 1 calc R . . 
C33 C 0.6634(17) 0.6538(10) 0.4606(11) 0.054(5) Uani 1 1 d . . . 
H33 H 0.6329 0.6613 0.5036 0.064 Uiso 1 1 calc R . . 
C34 C 0.7766(19) 0.7311(11) 0.4330(12) 0.070(7) Uani 1 1 d . . . 
C35 C 0.8315(14) 0.5002(9) 0.4032(10) 0.040(4) Uani 1 1 d . . . 
H35A H 0.8018 0.4523 0.3944 0.048 Uiso 1 1 calc R . . 
H35B H 0.8780 0.5074 0.4420 0.048 Uiso 1 1 calc R . . 
C36 C 0.9340(19) 0.6680(11) 0.4334(12) 0.068(7) Uani 1 1 d . . . 
H36A H 0.9625 0.6508 0.4696 0.081 Uiso 1 1 calc R . . 
H36B H 0.9588 0.7170 0.4402 0.081 Uiso 1 1 calc R . . 
C37 C 0.8556(11) 0.4630(8) 0.2834(8) 0.029(4) Uani 1 1 d . . . 
C38 C 1.0011(13) 0.5239(9) 0.2750(11) 0.044(5) Uani 1 1 d . . . 
H38 H 1.0640 0.4994 0.2679 0.053 Uiso 1 1 calc R . . 
C39 C 0.9767(13) 0.5397(10) 0.3483(11) 0.048(5) Uani 1 1 d . . . 
H39 H 1.0293 0.5257 0.3759 0.058 Uiso 1 1 calc R . . 
C40 C 0.9832(14) 0.6497(12) 0.3144(11) 0.055(5) Uani 1 1 d . . . 
C41 C 0.9196(11) 0.4323(9) 0.1677(9) 0.035(4) Uani 1 1 d . . . 
H41A H 0.8852 0.3868 0.1629 0.042 Uiso 1 1 calc R . . 
H41B H 0.9865 0.4214 0.1551 0.042 Uiso 1 1 calc R . . 
C42 C 1.0267(15) 0.6003(10) 0.1960(12) 0.055(6) Uani 1 1 d . . . 
H42A H 1.0559 0.6481 0.2030 0.066 Uiso 1 1 calc R . . 
H42B H 1.0750 0.5651 0.1758 0.066 Uiso 1 1 calc R . . 
C43 C 0.7722(14) 0.4559(8) 0.0988(8) 0.034(4) Uani 1 1 d . . . 
C44 C 0.8405(16) 0.5413(10) 0.0538(9) 0.048(5) Uani 1 1 d . . . 
H44 H 0.8561 0.5266 0.0064 0.057 Uiso 1 1 calc R . . 
C45 C 0.9173(14) 0.5193(8) 0.0946(9) 0.038(4) Uani 1 1 d . . . 
H45 H 0.9741 0.4997 0.0689 0.045 Uiso 1 1 calc R . . 
C46 C 0.8959(13) 0.6464(11) 0.1324(10) 0.045(5) Uani 1 1 d . . . 
C47 C 0.6573(15) 0.4990(13) 0.0227(11) 0.059(6) Uani 1 1 d . . . 
H47A H 0.6680 0.5077 -0.0200 0.071 Uiso 1 1 calc R . . 
H47B H 0.6264 0.4513 0.0135 0.071 Uiso 1 1 calc R . . 
C48 C 0.7687(16) 0.6596(11) 0.0475(10) 0.053(5) Uani 1 1 d . . . 
H48A H 0.7571 0.6353 -0.0003 0.064 Uiso 1 1 calc R . . 
H48B H 0.7998 0.7064 0.0527 0.064 Uiso 1 1 calc R . . 
C49 C 0.5237(16) 0.5346(12) 0.0985(10) 0.057(6) Uani 1 1 d . . . 
C50 C 0.5085(15) 0.6610(13) 0.1035(11) 0.057(6) Uani 1 1 d . . . 
H50 H 0.4559 0.6825 0.0821 0.069 Uiso 1 1 calc R . . 
C51 C 0.5836(15) 0.6260(11) 0.0525(12) 0.055(6) Uani 1 1 d . . . 
H51 H 0.5636 0.6256 0.0064 0.067 Uiso 1 1 calc R . . 
C52 C 0.6539(15) 0.7229(9) 0.1383(10) 0.045(5) Uani 1 1 d . . . 
C53 C 0.3992(9) 0.6069(13) 0.1731(4) 0.072(7) Uani 1 1 d . . . 
H53A H 0.3698 0.5591 0.1658 0.086 Uiso 1 1 calc R . . 
H53B H 0.3475 0.6379 0.1644 0.086 Uiso 1 1 calc R . . 
C54 C 0.5196(16) 0.7700(12) 0.2058(13) 0.066(6) Uani 1 1 d . . . 
H54A H 0.4541 0.7785 0.1892 0.079 Uiso 1 1 calc R . . 
H54B H 0.5580 0.8145 0.2134 0.079 Uiso 1 1 calc R . . 
C55 C 0.4585(13) 0.5929(10) 0.2825(10) 0.044(5) Uani 1 1 d . . . 
C56 C 0.4677(17) 0.7049(11) 0.3544(13) 0.067(7) Uani 1 1 d . . . 
H56 H 0.4196 0.7269 0.3872 0.080 Uiso 1 1 calc R . . 
C57 C 0.4330(16) 0.7095(13) 0.2809(15) 0.077(8) Uani 1 1 d . . . 
H57 H 0.3679 0.7306 0.2798 0.092 Uiso 1 1 calc R . . 
C58 C 0.5838(16) 0.7775(10) 0.3231(11) 0.052(5) Uani 1 1 d . . . 
C59 C 0.5069(14) 0.5983(10) 0.3979(10) 0.051(5) Uani 1 1 d . . . 
H59A H 0.4832 0.5484 0.3868 0.062 Uiso 1 1 calc R . . 
H59B H 0.4779 0.6252 0.4391 0.062 Uiso 1 1 calc R . . 
C60 C 0.6103(16) 0.7712(11) 0.4407(12) 0.061(6) Uani 1 1 d . . . 
H60A H 0.6376 0.8198 0.4487 0.073 Uiso 1 1 calc R . . 
H60B H 0.5620 0.7733 0.4736 0.073 Uiso 1 1 calc R . . 
 
loop_ 
 _atom_site_aniso_label 
 _atom_site_aniso_U_11 
 _atom_site_aniso_U_22 
 _atom_site_aniso_U_33 
 _atom_site_aniso_U_23 
 _atom_site_aniso_U_13 
 _atom_site_aniso_U_12 
Yb1 0.0335(4) 0.0218(4) 0.0393(5) 0.0050(3) 0.0043(3) -0.0005(3) 
Yb2 0.0531(5) 0.0237(4) 0.0628(6) 0.0136(4) 0.0208(4) 0.0060(4) 
Re1 0.0493(5) 0.0542(5) 0.0606(6) 0.0230(4) 0.0202(4) 0.0094(4) 
Re2 0.0455(5) 0.0546(6) 0.0996(8) 0.0364(5) 0.0199(5) 0.0103(4) 
Re3 0.0475(6) 0.1006(9) 0.0721(7) 0.0056(6) -0.0081(5) -0.0019(5) 
Re4 0.0400(5) 0.0846(7) 0.0550(6) -0.0221(5) 0.0123(4) -0.0146(5) 
Re5A 0.0652(12) 0.0554(11) 0.0689(13) 0.0130(9) 0.0004(10) 0.0029(9) 
Re5B 0.038(3) 0.138(6) 0.058(4) 0.047(4) -0.004(3) -0.026(4) 
Re6 0.083(4) 0.080(4) 0.067(3) 0.015(3) 0.023(3) -0.004(3) 
O1 0.039(7) 0.020(6) 0.055(8) 0.012(5) 0.001(6) 0.001(5) 
O2 0.041(8) 0.029(7) 0.076(10) -0.017(6) 0.012(7) 0.000(6) 
O3 0.036(7) 0.048(7) 0.037(7) 0.009(6) 0.010(6) -0.007(6) 
O4 0.040(7) 0.023(6) 0.067(9) -0.011(6) 0.021(6) 0.008(5) 
O5 0.062(8) 0.023(6) 0.038(7) 0.005(5) 0.008(6) -0.003(6) 
O6 0.066(10) 0.029(7) 0.093(12) 0.010(7) 0.034(9) 0.010(7) 
O7 0.025(6) 0.043(7) 0.080(10) 0.026(7) 0.006(6) -0.005(5) 
O8 0.049(8) 0.026(6) 0.057(8) 0.017(6) 0.014(6) 0.001(5) 
O9 0.044(7) 0.018(6) 0.060(8) -0.005(5) 0.019(6) 0.000(5) 
O10 0.037(7) 0.030(6) 0.050(8) -0.001(6) 0.005(6) -0.008(5) 
O11 0.051(8) 0.026(6) 0.058(8) 0.021(6) 0.024(6) 0.001(5) 
O12 0.076(11) 0.015(6) 0.112(13) 0.015(7) 0.010(9) -0.014(6) 
O13 0.037(7) 0.026(6) 0.051(8) 0.005(5) 0.013(6) -0.008(5) 
O14 0.043(8) 0.036(7) 0.057(9) 0.014(6) -0.008(6) -0.012(6) 
O15 0.052(8) 0.043(7) 0.040(7) 0.015(6) -0.002(6) -0.006(6) 
O16 0.049(8) 0.016(6) 0.060(9) 0.008(5) 0.008(6) 0.003(5) 
O17 0.079(11) 0.053(9) 0.078(11) 0.040(8) -0.023(9) -0.031(8) 
O18 0.071(10) 0.029(7) 0.093(11) 0.030(7) 0.052(9) 0.019(6) 
O19 0.048(8) 0.036(7) 0.079(11) 0.011(7) 0.008(7) 0.000(6) 
O20 0.075(11) 0.040(8) 0.092(12) 0.012(8) 0.031(9) -0.011(7) 
O21 0.033(7) 0.039(7) 0.055(8) 0.001(6) 0.016(6) 0.008(5) 
O22 0.047(7) 0.021(6) 0.036(7) 0.008(5) 0.009(5) -0.005(5) 
O23 0.042(7) 0.044(7) 0.052(8) 0.026(6) 0.007(6) 0.005(6) 
O24 0.085(11) 0.040(7) 0.045(8) 0.018(6) -0.008(7) -0.024(7) 
O25 0.074(10) 0.029(7) 0.090(12) 0.013(7) 0.017(9) 0.015(7) 
O26 0.080(11) 0.039(8) 0.068(10) 0.022(7) 0.029(8) 0.017(7) 
O27 0.064(10) 0.057(9) 0.108(14) 0.046(9) -0.010(9) -0.019(8) 
O28 0.072(10) 0.055(9) 0.065(10) 0.014(8) 0.034(8) -0.003(8) 
O29 0.066(10) 0.073(10) 0.103(12) 0.036(9) 0.022(9) 0.017(8) 
O30 0.043(8) 0.068(10) 0.062(9) 0.021(8) 0.027(7) 0.003(7) 
O31 0.107(13) 0.034(8) 0.061(10) 0.006(7) 0.041(9) -0.006(8) 
O32 0.051(9) 0.088(12) 0.095(13) 0.020(10) 0.027(9) -0.030(8) 
O33 0.108(12) 0.105(12) 0.109(12) 0.033(6) 0.004(5) -0.001(5) 
O34 0.108(14) 0.144(15) 0.117(14) 0.057(12) 0.009(11) 0.034(12) 
O35 0.072(10) 0.054(9) 0.121(13) 0.020(9) 0.001(9) -0.007(8) 
O36 0.080(11) 0.070(10) 0.130(14) 0.023(10) 0.022(10) -0.003(9) 
O37 0.083(9) 0.089(9) 0.082(9) 0.018(5) 0.003(5) 0.003(5) 
O38 0.058(7) 0.057(7) 0.065(7) 0.019(5) 0.000(5) -0.002(5) 
O39 0.050(6) 0.061(6) 0.059(6) 0.020(5) 0.004(4) 0.006(4) 
O40 0.037(8) 0.082(11) 0.059(10) -0.015(8) 0.005(7) 0.003(7) 
O41 0.105(15) 0.193(19) 0.191(19) 0.060(15) 0.032(14) 0.004(14) 
O42 0.097(13) 0.162(16) 0.112(14) 0.033(13) 0.018(11) -0.020(12) 
O43 0.056(10) 0.120(15) 0.054(10) -0.014(10) 0.012(8) -0.019(10) 
O44 0.044(9) 0.095(13) 0.076(12) -0.007(9) -0.002(8) 0.013(8) 
O45A 0.065(6) 0.067(6) 0.063(6) 0.017(4) 0.005(4) -0.001(4) 
O46A 0.082(8) 0.082(8) 0.084(8) 0.026(5) 0.007(5) -0.001(5) 
O47A 0.081(8) 0.080(8) 0.081(8) 0.024(5) 0.004(5) 0.002(5) 
O48A 0.084(8) 0.083(8) 0.084(8) 0.025(5) 0.006(5) 0.001(5) 
O45B 0.086(9) 0.085(9) 0.087(9) 0.026(5) 0.003(5) 0.005(5) 
O46B 0.085(8) 0.084(8) 0.085(8) 0.024(5) 0.006(5) 0.002(5) 
O47B 0.083(10) 0.083(10) 0.084(10) 0.025(5) 0.005(5) 0.002(5) 
O48B 0.083(9) 0.083(9) 0.084(9) 0.025(5) 0.005(5) 0.002(5) 
O49 0.068(10) 0.057(9) 0.084(12) 0.031(9) -0.023(9) 0.000(8) 
O50 0.102(7) 0.098(7) 0.091(7) 0.031(5) 0.021(5) -0.005(5) 
O51 0.109(8) 0.102(8) 0.107(8) 0.036(5) 0.002(5) 0.004(5) 
N1 0.040(9) 0.037(8) 0.046(10) 0.008(7) 0.001(7) 0.001(7) 
N2 0.036(8) 0.023(7) 0.026(7) -0.015(6) 0.003(6) -0.001(6) 
N3 0.050(10) 0.039(9) 0.055(10) 0.007(8) 0.028(8) 0.010(7) 
N4 0.037(9) 0.045(9) 0.034(9) -0.016(7) 0.005(7) -0.001(7) 
N5 0.041(8) 0.019(7) 0.045(9) 0.007(6) 0.003(7) 0.008(6) 
N6 0.033(8) 0.044(9) 0.058(10) 0.028(8) 0.012(7) -0.005(7) 
N7 0.057(11) 0.024(8) 0.078(13) 0.016(8) 0.002(9) -0.009(7) 
N8 0.027(8) 0.051(10) 0.057(11) 0.005(8) 0.000(7) -0.008(7) 
N9 0.066(11) 0.027(8) 0.050(10) 0.020(7) 0.013(8) -0.002(7) 
N10 0.073(12) 0.043(9) 0.051(10) 0.032(8) 0.027(9) 0.025(8) 
N11 0.074(13) 0.027(8) 0.084(14) 0.026(9) 0.020(10) 0.016(8) 
N12 0.057(11) 0.036(9) 0.073(12) 0.021(9) 0.020(9) 0.010(8) 
N13 0.035(8) 0.036(8) 0.056(10) 0.002(7) 0.001(7) -0.012(7) 
N14 0.029(8) 0.039(8) 0.046(9) 0.005(7) 0.015(7) 0.000(6) 
N15 0.035(8) 0.033(8) 0.046(9) 0.007(7) 0.009(7) 0.016(6) 
N16 0.064(11) 0.048(10) 0.046(10) 0.002(8) 0.016(9) 0.029(9) 
N17 0.024(7) 0.044(9) 0.035(8) 0.001(7) 0.004(6) 0.003(6) 
N18 0.054(10) 0.028(8) 0.048(10) 0.003(7) 0.010(8) 0.004(7) 
N19 0.036(9) 0.058(10) 0.033(9) -0.003(7) 0.015(7) -0.009(7) 
N20 0.049(9) 0.026(8) 0.051(10) 0.004(7) 0.024(8) 0.000(7) 
N21 0.048(10) 0.051(10) 0.050(10) 0.011(8) 0.020(8) -0.011(8) 
N22 0.063(10) 0.025(8) 0.033(8) 0.000(6) 0.020(7) 0.000(7) 
N23 0.052(10) 0.031(8) 0.054(10) 0.002(7) 0.014(8) -0.001(7) 
N24 0.088(15) 0.025(9) 0.091(15) 0.002(9) 0.027(12) 0.001(9) 
N25 0.028(8) 0.049(9) 0.056(10) 0.011(8) 0.009(7) -0.010(7) 
N26 0.040(9) 0.043(9) 0.052(10) 0.004(8) 0.002(8) 0.008(7) 
N27 0.033(8) 0.048(9) 0.056(10) 0.018(8) -0.002(7) -0.018(7) 
N28 0.042(9) 0.046(9) 0.039(9) -0.008(7) 0.002(7) 0.000(7) 
N29 0.035(8) 0.023(7) 0.034(8) 0.007(6) 0.019(6) 0.005(6) 
N30 0.055(10) 0.039(9) 0.052(10) 0.020(8) 0.006(8) -0.007(7) 
N31 0.042(8) 0.023(7) 0.033(8) -0.002(6) 0.004(7) -0.007(6) 
N32 0.059(10) 0.022(7) 0.062(11) 0.007(7) 0.036(9) 0.016(7) 
N33 0.059(11) 0.054(10) 0.059(11) 0.027(9) -0.013(9) -0.017(9) 
N34 0.050(10) 0.054(11) 0.084(14) 0.043(10) 0.003(10) 0.002(8) 
N35 0.032(8) 0.044(9) 0.082(13) 0.038(9) 0.017(8) 0.008(7) 
N36 0.052(10) 0.052(10) 0.069(12) 0.038(9) 0.011(9) 0.000(8) 
N37 0.060(12) 0.086(14) 0.055(12) 0.013(10) 0.035(9) -0.016(10) 
N38 0.066(12) 0.025(8) 0.073(12) -0.001(8) 0.027(10) 0.004(8) 
N39 0.065(12) 0.051(11) 0.100(16) 0.034(11) 0.036(11) 0.023(9) 
N40 0.053(11) 0.031(9) 0.122(17) 0.030(10) 0.044(11) 0.023(8) 
C1 0.029(9) 0.027(9) 0.042(10) 0.011(8) -0.003(8) -0.005(7) 
C2 0.049(12) 0.049(12) 0.040(11) 0.008(9) 0.016(9) 0.010(9) 
C3 0.040(10) 0.021(8) 0.036(10) -0.009(7) -0.004(8) -0.005(7) 
C4 0.028(9) 0.038(10) 0.048(12) -0.007(9) -0.002(8) 0.002(8) 
C5 0.045(11) 0.025(9) 0.069(14) -0.023(9) 0.018(10) -0.012(8) 
C6 0.041(11) 0.032(10) 0.064(14) -0.012(9) 0.012(10) 0.004(8) 
C7 0.013(7) 0.028(9) 0.052(11) 0.004(8) 0.018(7) 0.000(6) 
C8 0.046(11) 0.020(9) 0.060(13) -0.014(8) 0.011(10) -0.009(8) 
C9 0.019(8) 0.023(8) 0.054(12) -0.002(8) 0.017(8) -0.003(6) 
C10 0.037(9) 0.008(7) 0.069(11) 0.009(7) 0.023(8) -0.001(6) 
C11 0.075(14) 0.019(8) 0.028(9) -0.005(7) 0.024(9) 0.010(8) 
C12 0.078(17) 0.050(14) 0.075(17) -0.010(12) 0.025(14) -0.010(12) 
C13 0.046(12) 0.057(13) 0.043(12) 0.008(10) 0.006(9) 0.010(10) 
C14 0.096(18) 0.029(10) 0.073(16) 0.017(10) 0.038(14) 0.015(11) 
C15 0.067(14) 0.039(11) 0.055(13) -0.008(10) 0.029(11) 0.016(10) 
C16 0.094(17) 0.023(9) 0.062(14) 0.019(9) 0.016(12) -0.016(10) 
C17 0.046(12) 0.043(11) 0.060(13) 0.011(10) 0.006(10) -0.011(9) 
C18 0.064(14) 0.036(11) 0.061(14) 0.012(10) 0.021(11) 0.023(10) 
C19 0.037(11) 0.035(10) 0.087(16) 0.031(11) -0.004(10) -0.002(8) 
C20 0.024(9) 0.017(8) 0.088(16) 0.008(9) -0.001(9) -0.009(7) 
C21 0.027(9) 0.022(9) 0.074(14) 0.003(9) -0.006(9) -0.003(7) 
C22 0.034(10) 0.042(11) 0.064(13) 0.016(10) 0.018(9) 0.008(8) 
C23 0.011(8) 0.042(11) 0.075(14) 0.003(10) 0.003(8) -0.010(7) 
C24 0.040(11) 0.023(9) 0.094(17) 0.011(10) 0.014(11) 0.007(8) 
C25 0.034(10) 0.054(11) 0.041(11) 0.027(9) 0.001(8) -0.013(8) 
C26 0.040(11) 0.071(14) 0.053(13) 0.019(11) 0.010(10) 0.025(10) 
C27 0.044(11) 0.054(12) 0.065(14) 0.030(10) 0.046(10) 0.022(9) 
C28 0.050(11) 0.047(11) 0.036(10) 0.016(9) 0.025(9) 0.017(9) 
C29 0.047(11) 0.026(9) 0.064(13) 0.021(9) 0.016(10) 0.004(8) 
C30 0.042(12) 0.067(14) 0.053(13) 0.017(11) 0.005(10) -0.004(10) 
C31 0.031(9) 0.027(8) 0.034(10) 0.007(7) 0.007(7) 0.004(7) 
C32 0.077(16) 0.043(12) 0.051(13) -0.014(10) 0.027(12) -0.020(11) 
C33 0.070(12) 0.037(10) 0.051(11) 0.008(8) 0.008(10) -0.008(9) 
C34 0.088(17) 0.034(11) 0.063(15) -0.025(10) 0.024(13) -0.038(11) 
C35 0.046(11) 0.020(8) 0.050(12) 0.003(8) 0.004(9) -0.001(7) 
C36 0.094(18) 0.044(12) 0.059(15) 0.011(11) -0.016(13) -0.038(12) 
C37 0.025(8) 0.023(8) 0.040(10) 0.010(7) 0.004(7) 0.011(6) 
C38 0.029(10) 0.032(10) 0.069(14) 0.011(9) 0.002(9) -0.002(8) 
C39 0.018(9) 0.048(11) 0.069(14) 0.002(10) -0.002(9) -0.013(8) 
C40 0.028(9) 0.073(12) 0.063(12) 0.023(10) -0.010(8) 0.001(9) 
C41 0.009(7) 0.030(9) 0.066(13) 0.015(8) 0.002(7) -0.006(6) 
C42 0.044(12) 0.026(10) 0.088(17) 0.008(10) 0.004(11) -0.012(8) 
C43 0.066(11) 0.011(7) 0.025(8) 0.004(6) 0.017(8) 0.016(7) 
C44 0.082(15) 0.034(10) 0.031(10) 0.015(8) 0.017(10) 0.007(10) 
C45 0.056(10) 0.012(7) 0.038(9) -0.008(6) 0.021(8) -0.016(7) 
C46 0.034(10) 0.062(12) 0.063(13) 0.047(11) 0.028(9) 0.012(9) 
C47 0.049(12) 0.075(15) 0.053(13) 0.024(12) -0.020(10) 0.005(11) 
C48 0.070(15) 0.056(13) 0.040(12) 0.024(10) -0.002(10) -0.008(11) 
C49 0.055(13) 0.073(14) 0.045(12) 0.025(11) -0.028(10) 0.002(11) 
C50 0.042(12) 0.091(17) 0.052(13) 0.042(12) -0.002(10) -0.019(11) 
C51 0.044(12) 0.052(12) 0.077(16) 0.034(12) -0.015(11) -0.007(10) 
C52 0.054(11) 0.028(8) 0.056(11) 0.020(8) -0.012(9) -0.005(8) 
C53 0.029(11) 0.083(17) 0.10(2) 0.032(15) -0.018(12) -0.013(11) 
C54 0.052(11) 0.053(11) 0.103(15) 0.039(11) 0.011(11) 0.028(9) 
C55 0.026(9) 0.052(12) 0.058(13) 0.024(10) 0.007(9) -0.003(8) 
C56 0.068(15) 0.045(12) 0.099(19) 0.029(12) 0.057(14) 0.033(11) 
C57 0.047(13) 0.082(17) 0.13(2) 0.072(17) 0.058(15) 0.037(12) 
C58 0.063(11) 0.027(9) 0.060(11) -0.001(8) 0.018(9) 0.010(8) 
C59 0.055(12) 0.042(11) 0.063(13) 0.014(10) 0.052(11) 0.017(9) 
C60 0.057(11) 0.037(10) 0.087(14) 0.011(9) 0.035(10) 0.010(9) 

_geom_special_details 
; 
 All esds (except the esd in the dihedral angle between two l.s. planes) 
 are estimated using the full covariance matrix.  The cell esds are taken 
 into account individually in the estimation of esds in distances, angles 
 and torsion angles; correlations between esds in cell parameters are only 
 used when they are defined by crystal symmetry.  An approximate (isotropic) 
 treatment of cell esds is used for estimating esds involving l.s. planes. 
;
loop_ 
 _geom_bond_atom_site_label_1 
 _geom_bond_atom_site_label_2 
 _geom_bond_distance 
 _geom_bond_site_symmetry_2 
 _geom_bond_publ_flag 
Yb1 O1 2.278(12) . ? 
Yb1 O13 2.311(11) . ? 
Yb1 O23 2.310(12) . ? 
Yb1 O22 2.318(11) . ? 
Yb1 O3 2.318(12) . ? 
Yb1 O11 2.325(12) . ? 
Yb1 O21 2.335(12) . ? 
Yb1 O24 2.343(13) . ? 
Yb2 O18 2.251(15) . ? 
Yb2 O26 2.284(14) . ? 
Yb2 O6 2.305(14) 1_565 ? 
Yb2 O28 2.302(14) . ? 
Yb2 O16 2.325(11) . ? 
Yb2 O8 2.327(11) 1_565 ? 
Yb2 O27 2.334(15) . ? 
Yb2 O25 2.327(16) . ? 
Re1 O29 1.696(16) . ? 
Re1 O30 1.690(13) . ? 
Re1 O31 1.749(16) . ? 
Re1 O32 1.861(15) . ? 
Re2 O33 1.54(4) . ? 
Re2 O36 1.66(2) . ? 
Re2 O35 1.689(17) . ? 
Re2 O34 1.73(2) . ? 
Re3 O38 1.67(2) . ? 
Re3 O40 1.707(14) . ? 
Re3 O39 1.717(18) . ? 
Re3 O37 1.76(3) . ? 
Re4 O42 1.58(3) . ? 
Re4 O43 1.650(16) . ? 
Re4 O41 1.65(3) . ? 
Re4 O44 1.751(16) . ? 
Re5A O47A 1.649(9) . ? 
Re5A O48A 1.722(9) . ? 
Re5A O46A 1.741(9) . ? 
Re5A O45A 1.762(8) . ? 
Re5B O46B 1.670(9) . ? 
Re5B O48B 1.723(10) . ? 
Re5B O47B 1.724(9) . ? 
Re5B O45B 1.738(9) . ? 
O1 C1 1.216(17) . ? 
O2 C4 1.113(18) . ? 
O3 C7 1.245(15) . ? 
O4 C10 1.198(15) . ? 
O5 C13 1.31(2) . ? 
O6 C16 1.23(2) . ? 
O6 Yb2 2.305(14) 1_545 ? 
O7 C19 1.248(19) . ? 
O8 C22 1.21(2) . ? 
O8 Yb2 2.327(11) 1_545 ? 
O9 C25 1.25(2) . ? 
O10 C28 1.259(19) . ? 
O11 C31 1.238(16) . ? 
O12 C34 1.21(2) . ? 
O13 C37 1.227(16) . ? 
O14 C40 1.25(2) . ? 
O15 C43 1.239(17) . ? 
O16 C46 1.24(2) . ? 
O17 C49 1.15(2) . ? 
O18 C52 1.280(18) . ? 
O19 C55 1.29(2) . ? 
O20 C58 1.19(2) . ? 
N1 C1 1.374(18) . ? 
N1 C3 1.441(15) . ? 
N1 C29 1.466(17) . ? 
N2 C1 1.368(16) . ? 
N2 C2 1.416(19) . ? 
N2 C5 1.47(2) . ? 
N3 C4 1.389(18) . ? 
N3 C2 1.444(19) . ? 
N3 C6 1.45(2) . ? 
N4 C30 1.43(2) . ? 
N4 C4 1.44(2) . ? 
N4 C3 1.469(16) . ? 
N5 C9 1.383(15) . ? 
N5 C7 1.401(17) . ? 
N5 C5 1.45(2) . ? 
N6 C7 1.373(17) . ? 
N6 C11 1.422(18) . ? 
N6 C8 1.453(16) . ? 
N7 C12 1.43(3) . ? 
N7 C8 1.460(18) . ? 
N7 C10 1.47(2) . ? 
N8 C10 1.259(17) . ? 
N8 C6 1.44(2) . ? 
N8 C9 1.462(17) . ? 
N9 C13 1.33(2) . ? 
N9 C15 1.37(2) . ? 
N9 C11 1.53(2) . ? 
N10 C13 1.29(2) . ? 
N10 C17 1.383(19) . ? 
N10 C14 1.480(19) . ? 
N11 C14 1.40(2) . ? 
N11 C18 1.412(19) . ? 
N11 C16 1.42(2) . ? 
N12 C16 1.37(2) . ? 
N12 C15 1.40(2) . ? 
N12 C12 1.47(2) . ? 
N13 C19 1.393(19) . ? 
N13 C21 1.459(17) . ? 
N13 C17 1.46(2) . ? 
N14 C19 1.38(2) . ? 
N14 C20 1.443(16) . ? 
N14 C23 1.44(2) . ? 
N15 C22 1.327(19) . ? 
N15 C24 1.46(2) . ? 
N15 C20 1.476(17) . ? 
N16 C22 1.30(2) . ? 
N16 C21 1.462(19) . ? 
N16 C18 1.56(2) . ? 
N17 C25 1.363(19) . ? 
N17 C27 1.38(2) . ? 
N17 C23 1.485(18) . ? 
N18 C25 1.386(18) . ? 
N18 C26 1.47(2) . ? 
N18 C29 1.468(18) . ? 
N19 C28 1.313(18) . ? 
N19 C26 1.43(2) . ? 
N19 C30 1.44(2) . ? 
N20 C28 1.34(2) . ? 
N20 C24 1.46(2) . ? 
N20 C27 1.463(19) . ? 
N21 C31 1.375(17) . ? 
N21 C33 1.38(2) . ? 
N21 C59 1.45(2) . ? 
N22 C31 1.345(17) . ? 
N22 C35 1.392(17) . ? 
N22 C32 1.452(19) . ? 
N23 C36 1.37(3) . ? 
N23 C34 1.46(3) . ? 
N23 C32 1.46(2) . ? 
N24 C34 1.30(2) . ? 
N24 C60 1.43(2) . ? 
N24 C33 1.482(19) . ? 
N25 C37 1.317(17) . ? 
N25 C39 1.415(17) . ? 
N25 C35 1.472(19) . ? 
N26 C37 1.428(17) . ? 
N26 C41 1.442(18) . ? 
N26 C38 1.449(18) . ? 
N27 C40 1.38(2) . ? 
N27 C38 1.429(18) . ? 
N27 C42 1.45(2) . ? 
N28 C40 1.43(2) . ? 
N28 C36 1.47(2) . ? 
N28 C39 1.52(2) . ? 
N29 C43 1.401(19) . ? 
N29 C45 1.433(15) . ? 
N29 C41 1.461(17) . ? 
N30 C43 1.335(15) . ? 
N30 C44 1.44(2) . ? 
N30 C47 1.516(19) . ? 
N31 C46 1.36(2) . ? 
N31 C44 1.402(18) . ? 
N31 C48 1.45(2) . ? 
N32 C46 1.344(17) . ? 
N32 C42 1.46(2) . ? 
N32 C45 1.528(15) . ? 
N33 C47 1.40(2) . ? 
N33 C49 1.40(2) . ? 
N33 C51 1.494(19) . ? 
N34 C53 1.409(9) . ? 
N34 C50 1.46(2) . ? 
N34 C49 1.47(2) . ? 
N35 C52 1.32(2) . ? 
N35 C50 1.40(2) . ? 
N35 C54 1.43(2) . ? 
N36 C52 1.37(2) . ? 
N36 C51 1.46(2) . ? 
N36 C48 1.50(2) . ? 
N37 C55 1.345(19) . ? 
N37 C53 1.424(9) . ? 
N37 C57 1.44(3) . ? 
N38 C55 1.28(2) . ? 
N38 C59 1.43(2) . ? 
N38 C56 1.45(2) . ? 
N39 C58 1.33(2) . ? 
N39 C56 1.43(2) . ? 
N39 C60 1.55(2) . ? 
N40 C58 1.39(2) . ? 
N40 C57 1.46(2) . ? 
N40 C54 1.46(2) . ? 
C2 C3 1.53(3) . ? 
C2 H2 0.9800 . ? 
C3 H3 0.9800 . ? 
C5 H5A 0.9700 . ? 
C5 H5B 0.9700 . ? 
C6 H6A 0.9700 . ? 
C6 H6B 0.9700 . ? 
C8 C9 1.56(3) . ? 
C8 H8 0.9800 . ? 
C9 H9 0.9800 . ? 
C11 H11A 0.9700 . ? 
C11 H11B 0.9700 . ? 
C12 H12A 0.9700 . ? 
C12 H12B 0.9700 . ? 
C14 C15 1.60(3) . ? 
C14 H14 0.9800 . ? 
C15 H15 0.9800 . ? 
C17 H17A 0.9700 . ? 
C17 H17B 0.9700 . ? 
C18 H18A 0.9700 . ? 
C18 H18B 0.9700 . ? 
C20 C21 1.57(3) . ? 
C20 H20 0.9800 . ? 
C21 H21 0.9800 . ? 
C23 H23A 0.9700 . ? 
C23 H23B 0.9700 . ? 
C24 H24A 0.9700 . ? 
C24 H24B 0.9700 . ? 
C26 C27 1.59(3) . ? 
C26 H26 0.9800 . ? 
C27 H27 0.9800 . ? 
C29 H29A 0.9700 . ? 
C29 H29B 0.9700 . ? 
C30 H30A 0.9700 . ? 
C30 H30B 0.9700 . ? 
C32 C33 1.63(3) . ? 
C32 H32 0.9800 . ? 
C33 H33 0.9800 . ? 
C35 H35A 0.9700 . ? 
C35 H35B 0.9700 . ? 
C36 H36A 0.9700 . ? 
C36 H36B 0.9700 . ? 
C38 C39 1.52(3) . ? 
C38 H38 0.9800 . ? 
C39 H39 0.9800 . ? 
C41 H41A 0.9700 . ? 
C41 H41B 0.9700 . ? 
C42 H42A 0.9700 . ? 
C42 H42B 0.9700 . ? 
C44 C45 1.45(3) . ? 
C44 H44 0.9800 . ? 
C45 H45 0.9800 . ? 
C47 H47A 0.9700 . ? 
C47 H47B 0.9700 . ? 
C48 H48A 0.9700 . ? 
C48 H48B 0.9700 . ? 
C50 C51 1.53(3) . ? 
C50 H50 0.9800 . ? 
C51 H51 0.9800 . ? 
C53 H53A 0.9700 . ? 
C53 H53B 0.9700 . ? 
C54 H54A 0.9700 . ? 
C54 H54B 0.9700 . ? 
C56 C57 1.60(4) . ? 
C56 H56 0.9800 . ? 
C57 H57 0.9800 . ? 
C59 H59A 0.9700 . ? 
C59 H59B 0.9700 . ? 
C60 H60A 0.9700 . ? 
C60 H60B 0.9700 . ? 
 
loop_ 
 _geom_angle_atom_site_label_1 
 _geom_angle_atom_site_label_2 
 _geom_angle_atom_site_label_3 
 _geom_angle 
 _geom_angle_site_symmetry_1 
 _geom_angle_site_symmetry_3 
 _geom_angle_publ_flag 
O1 Yb1 O13 86.8(4) . . ? 
O1 Yb1 O23 78.3(4) . . ? 
O13 Yb1 O23 70.9(4) . . ? 
O1 Yb1 O22 73.4(4) . . ? 
O13 Yb1 O22 76.5(4) . . ? 
O23 Yb1 O22 137.5(4) . . ? 
O1 Yb1 O3 76.7(4) . . ? 
O13 Yb1 O3 144.6(4) . . ? 
O23 Yb1 O3 75.1(4) . . ? 
O22 Yb1 O3 126.2(4) . . ? 
O1 Yb1 O11 146.8(4) . . ? 
O13 Yb1 O11 75.4(4) . . ? 
O23 Yb1 O11 120.0(5) . . ? 
O22 Yb1 O11 75.2(4) . . ? 
O3 Yb1 O11 132.5(4) . . ? 
O1 Yb1 O21 105.6(4) . . ? 
O13 Yb1 O21 144.1(4) . . ? 
O23 Yb1 O21 144.0(4) . . ? 
O22 Yb1 O21 75.2(4) . . ? 
O3 Yb1 O21 71.2(4) . . ? 
O11 Yb1 O21 76.5(4) . . ? 
O1 Yb1 O24 141.7(4) . . ? 
O13 Yb1 O24 108.9(5) . . ? 
O23 Yb1 O24 74.8(5) . . ? 
O22 Yb1 O24 143.2(5) . . ? 
O3 Yb1 O24 70.5(4) . . ? 
O11 Yb1 O24 71.4(5) . . ? 
O21 Yb1 O24 82.3(5) . . ? 
O18 Yb2 O26 76.6(6) . . ? 
O18 Yb2 O6 86.7(5) . 1_565 ? 
O26 Yb2 O6 70.8(5) . 1_565 ? 
O18 Yb2 O28 105.9(6) . . ? 
O26 Yb2 O28 149.5(5) . . ? 
O6 Yb2 O28 139.1(5) 1_565 . ? 
O18 Yb2 O16 76.4(4) . . ? 
O26 Yb2 O16 75.1(5) . . ? 
O6 Yb2 O16 144.6(5) 1_565 . ? 
O28 Yb2 O16 76.0(5) . . ? 
O18 Yb2 O8 147.3(5) . 1_565 ? 
O26 Yb2 O8 120.9(5) . 1_565 ? 
O6 Yb2 O8 75.4(5) 1_565 1_565 ? 
O28 Yb2 O8 73.6(5) . 1_565 ? 
O16 Yb2 O8 132.5(4) . 1_565 ? 
O18 Yb2 O27 73.4(5) . . ? 
O26 Yb2 O27 135.2(6) . . ? 
O6 Yb2 O27 74.9(6) 1_565 . ? 
O28 Yb2 O27 72.0(6) . . ? 
O16 Yb2 O27 127.2(5) . . ? 
O8 Yb2 O27 75.5(5) 1_565 . ? 
O18 Yb2 O25 140.9(5) . . ? 
O26 Yb2 O25 75.5(6) . . ? 
O6 Yb2 O25 109.0(6) 1_565 . ? 
O28 Yb2 O25 85.8(6) . . ? 
O16 Yb2 O25 70.4(5) . . ? 
O8 Yb2 O25 71.7(5) 1_565 . ? 
O27 Yb2 O25 144.4(5) . . ? 
O29 Re1 O30 110.6(8) . . ? 
O29 Re1 O31 109.2(8) . . ? 
O30 Re1 O31 107.6(8) . . ? 
O29 Re1 O32 109.2(9) . . ? 
O30 Re1 O32 109.9(7) . . ? 
O31 Re1 O32 110.3(7) . . ? 
O33 Re2 O36 117.2(16) . . ? 
O33 Re2 O35 112.3(16) . . ? 
O36 Re2 O35 108.4(9) . . ? 
O33 Re2 O34 105.1(17) . . ? 
O36 Re2 O34 108.5(11) . . ? 
O35 Re2 O34 104.4(11) . . ? 
O38 Re3 O40 109.7(10) . . ? 
O38 Re3 O39 108.7(10) . . ? 
O40 Re3 O39 111.3(8) . . ? 
O38 Re3 O37 116.9(12) . . ? 
O40 Re3 O37 107.3(10) . . ? 
O39 Re3 O37 102.9(11) . . ? 
O42 Re4 O43 120.9(12) . . ? 
O42 Re4 O41 104.1(15) . . ? 
O43 Re4 O41 101.9(12) . . ? 
O42 Re4 O44 104.7(11) . . ? 
O43 Re4 O44 113.4(8) . . ? 
O41 Re4 O44 111.6(12) . . ? 
O47A Re5A O48A 112.5(7) . . ? 
O47A Re5A O46A 111.0(7) . . ? 
O48A Re5A O46A 108.2(7) . . ? 
O47A Re5A O45A 110.4(7) . . ? 
O48A Re5A O45A 107.8(7) . . ? 
O46A Re5A O45A 106.7(6) . . ? 
O46B Re5B O48B 110.4(8) . . ? 
O46B Re5B O47B 112.2(8) . . ? 
O48B Re5B O47B 107.9(7) . . ? 
O46B Re5B O45B 109.5(7) . . ? 
O48B Re5B O45B 108.0(7) . . ? 
O47B Re5B O45B 108.9(7) . . ? 
C1 O1 Yb1 156.2(9) . . ? 
C7 O3 Yb1 152.4(9) . . ? 
C16 O6 Yb2 151.6(12) . 1_545 ? 
C22 O8 Yb2 151.8(10) . 1_545 ? 
C31 O11 Yb1 147.1(9) . . ? 
C37 O13 Yb1 147.6(9) . . ? 
C46 O16 Yb2 152.6(9) . . ? 
C52 O18 Yb2 156.6(10) . . ?  
C1 N1 C3 111.5(10) . . ? 
C1 N1 C29 119.7(10) . . ? 
C3 N1 C29 125.4(11) . . ? 
C1 N2 C2 114.1(11) . . ? 
C1 N2 C5 123.8(10) . . ? 
C2 N2 C5 122.0(10) . . ? 
C4 N3 C2 118.4(11) . . ? 
C4 N3 C6 118.7(11) . . ? 
C2 N3 C6 122.3(11) . . ? 
C30 N4 C4 120.3(11) . . ? 
C30 N4 C3 126.6(12) . . ? 
C4 N4 C3 113.1(10) . . ? 
C9 N5 C7 113.9(10) . . ? 
C9 N5 C5 122.7(10) . . ? 
C7 N5 C5 123.1(10) . . ? 
C7 N6 C11 122.5(11) . . ? 
C7 N6 C8 110.0(11) . . ? 
C11 N6 C8 125.9(11) . . ? 
C12 N7 C8 122.2(13) . . ? 
C12 N7 C10 128.2(12) . . ? 
C8 N7 C10 109.5(11) . . ? 
C10 N8 C6 119.0(12) . . ? 
C10 N8 C9 120.0(13) . . ? 
C6 N8 C9 120.4(11) . . ? 
C13 N9 C15 114.6(13) . . ? 
C13 N9 C11 123.2(11) . . ? 
C15 N9 C11 121.8(12) . . ? 
C13 N10 C17 125.7(13) . . ? 
C13 N10 C14 109.6(14) . . ? 
C17 N10 C14 123.5(13) . . ? 
C14 N11 C18 127.3(15) . . ? 
C14 N11 C16 111.1(14) . . ? 
C18 N11 C16 121.4(13) . . ? 
C16 N12 C15 114.4(13) . . ? 
C16 N12 C12 120.0(13) . . ? 
C15 N12 C12 124.2(13) . . ? 
C19 N13 C21 108.8(12) . . ? 
C19 N13 C17 123.9(12) . . ? 
C21 N13 C17 127.1(12) . . ? 
C19 N14 C20 109.9(11) . . ? 
C19 N14 C23 121.8(11) . . ? 
C20 N14 C23 126.4(12) . . ? 
C22 N15 C24 124.9(11) . . ? 
C22 N15 C20 110.4(12) . . ? 
C24 N15 C20 122.3(11) . . ? 
C22 N16 C21 116.5(13) . . ? 
C22 N16 C18 125.0(14) . . ? 
C21 N16 C18 118.5(12) . . ? 
C25 N17 C27 113.6(12) . . ? 
C25 N17 C23 119.0(11) . . ? 
C27 N17 C23 124.4(11) . . ? 
C25 N18 C26 112.8(11) . . ? 
C25 N18 C29 123.0(12) . . ? 
C26 N18 C29 124.2(11) . . ? 
C28 N19 C26 113.8(12) . . ? 
C28 N19 C30 123.4(13) . . ? 
C26 N19 C30 122.5(12) . . ? 
C28 N20 C24 125.5(11) . . ? 
C28 N20 C27 114.5(11) . . ? 
C24 N20 C27 119.6(11) . . ? 
C31 N21 C33 112.0(12) . . ? 
C31 N21 C59 121.9(12) . . ? 
C33 N21 C59 123.2(12) . . ? 
C31 N22 C35 121.0(10) . . ? 
C31 N22 C32 113.5(12) . . ? 
C35 N22 C32 124.3(13) . . ? 
C36 N23 C34 121.8(12) . . ? 
C36 N23 C32 125.9(14) . . ? 
C34 N23 C32 107.7(13) . . ? 
C34 N24 C60 122.7(15) . . ? 
C34 N24 C33 114.8(14) . . ? 
C60 N24 C33 120.3(14) . . ? 
C37 N25 C39 114.3(11) . . ? 
C37 N25 C35 120.7(10) . . ? 
C39 N25 C35 125.0(12) . . ? 
C37 N26 C41 122.2(11) . . ? 
C37 N26 C38 108.8(11) . . ? 
C41 N26 C38 127.2(12) . . ? 
C40 N27 C38 113.4(13) . . ? 
C40 N27 C42 122.1(12) . . ? 
C38 N27 C42 124.2(12) . . ? 
C40 N28 C36 121.6(13) . . ? 
C40 N28 C39 111.0(12) . . ? 
C36 N28 C39 127.5(12) . . ? 
C43 N29 C45 111.1(10) . . ? 
C43 N29 C41 123.3(9) . . ? 
C45 N29 C41 125.6(10) . . ? 
C43 N30 C44 114.5(12) . . ? 
C43 N30 C47 120.6(12) . . ? 
C44 N30 C47 123.7(12) . . ? 
C46 N31 C44 112.0(11) . . ? 
C46 N31 C48 123.2(12) . . ? 
C44 N31 C48 124.8(12) . . ? 
C46 N32 C42 124.5(12) . . ? 
C46 N32 C45 111.1(12) . . ? 
C42 N32 C45 121.3(11) . . ? 
C47 N33 C49 121.6(14) . . ? 
C47 N33 C51 125.3(14) . . ? 
C49 N33 C51 112.0(13) . . ? 
C53 N34 C50 126.2(14) . . ? 
C53 N34 C49 121.4(14) . . ? 
C50 N34 C49 111.8(13) . . ? 
C52 N35 C50 112.9(12) . . ? 
C52 N35 C54 120.2(13) . . ? 
C50 N35 C54 124.5(14) . . ? 
C52 N36 C51 110.5(13) . . ? 
C52 N36 C48 125.6(13) . . ? 
C51 N36 C48 123.9(13) . . ? 
C55 N37 C53 125.2(14) . . ? 
C55 N37 C57 110.3(14) . . ? 
C53 N37 C57 124.2(15) . . ? 
C55 N38 C59 126.8(12) . . ? 
C55 N38 C56 110.0(13) . . ? 
C59 N38 C56 122.4(13) . . ? 
C58 N39 C56 116.1(16) . . ? 
C58 N39 C60 119.1(14) . . ? 
C56 N39 C60 122.6(13) . . ? 
C58 N40 C57 115.1(14) . . ? 
C58 N40 C54 123.2(13) . . ? 
C57 N40 C54 120.9(15) . . ? 
O1 C1 N2 126.1(14) . . ? 
O1 C1 N1 127.2(13) . . ? 
N2 C1 N1 106.7(11) . . ? 
N2 C2 N3 116.2(14) . . ? 
N2 C2 C3 102.8(14) . . ? 
N3 C2 C3 101.2(13) . . ? 
N2 C2 H2 111.9 . . ? 
N3 C2 H2 111.9 . . ? 
C3 C2 H2 111.9 . . ? 
N1 C3 N4 112.2(11) . . ? 
N1 C3 C2 104.2(13) . . ? 
N4 C3 C2 105.0(13) . . ? 
N1 C3 H3 111.7 . . ? 
N4 C3 H3 111.7 . . ? 
C2 C3 H3 111.7 . . ? 
O2 C4 N3 130.6(17) . . ? 
O2 C4 N4 127.7(15) . . ? 
N3 C4 N4 101.7(11) . . ? 
N5 C5 N2 114.2(14) . . ? 
N5 C5 H5A 108.7 . . ? 
N2 C5 H5A 108.7 . . ? 
N5 C5 H5B 108.7 . . ? 
N2 C5 H5B 108.7 . . ? 
H5A C5 H5B 107.6 . . ? 
N8 C6 N3 112.8(13) . . ? 
N8 C6 H6A 109.0 . . ? 
N3 C6 H6A 109.0 . . ? 
N8 C6 H6B 109.0 . . ? 
N3 C6 H6B 109.0 . . ? 
H6A C6 H6B 107.8 . . ? 
O3 C7 N6 124.2(14) . . ? 
O3 C7 N5 127.6(14) . . ? 
N6 C7 N5 108.2(10) . . ? 
N6 C8 N7 116.2(13) . . ? 
N6 C8 C9 104.8(13) . . ? 
N7 C8 C9 105.0(13) . . ? 
N6 C8 H8 110.1 . . ? 
N7 C8 H8 110.1 . . ? 
C9 C8 H8 110.1 . . ? 
N5 C9 N8 118.0(11) . . ? 
N5 C9 C8 102.9(12) . . ? 
N8 C9 C8 99.2(12) . . ? 
N5 C9 H9 111.8 . . ? 
N8 C9 H9 111.8 . . ? 
C8 C9 H9 111.8 . . ? 
O4 C10 N8 137.9(17) . . ? 
O4 C10 N7 116.2(14) . . ? 
N8 C10 N7 105.9(11) . . ? 
N6 C11 N9 112.8(11) . . ? 
N6 C11 H11A 109.0 . . ? 
N9 C11 H11A 109.0 . . ? 
N6 C11 H11B 109.0 . . ? 
N9 C11 H11B 109.0 . . ? 
H11A C11 H11B 107.8 . . ? 
N7 C12 N12 114.1(16) . . ? 
N7 C12 H12A 108.7 . . ? 
N12 C12 H12A 108.7 . . ? 
N7 C12 H12B 108.7 . . ? 
N12 C12 H12B 108.7 . . ? 
H12A C12 H12B 107.6 . . ? 
N10 C13 O5 123.4(16) . . ? 
N10 C13 N9 112.4(15) . . ? 
O5 C13 N9 124.1(15) . . ? 
N11 C14 N10 113.5(15) . . ? 
N11 C14 C15 104.8(17) . . ? 
N10 C14 C15 102.1(15) . . ? 
N11 C14 H14 112.0 . . ? 
N10 C14 H14 112.0 . . ? 
C15 C14 H14 112.0 . . ? 
N9 C15 N12 117.9(17) . . ? 
N9 C15 C14 100.9(15) . . ? 
N12 C15 C14 102.0(14) . . ? 
N9 C15 H15 111.7 . . ? 
N12 C15 H15 111.7 . . ? 
C14 C15 H15 111.7 . . ? 
O6 C16 N12 126.4(19) . . ? 
O6 C16 N11 126.1(19) . . ? 
N12 C16 N11 107.5(14) . . ? 
N10 C17 N13 111.0(14) . . ? 
N10 C17 H17A 109.4 . . ? 
N13 C17 H17A 109.4 . . ? 
N10 C17 H17B 109.4 . . ? 
N13 C17 H17B 109.4 . . ? 
H17A C17 H17B 108.0 . . ? 
N11 C18 N16 108.1(12) . . ? 
N11 C18 H18A 110.1 . . ? 
N16 C18 H18A 110.1 . . ? 
N11 C18 H18B 110.1 . . ? 
N16 C18 H18B 110.1 . . ? 
H18A C18 H18B 108.4 . . ? 
O7 C19 N14 125.9(15) . . ? 
O7 C19 N13 122.1(18) . . ? 
N14 C19 N13 111.7(13) . . ? 
N14 C20 N15 116.0(13) . . ? 
N14 C20 C21 104.1(14) . . ? 
N15 C20 C21 104.5(11) . . ? 
N14 C20 H20 110.6 . . ? 
N15 C20 H20 110.6 . . ? 
C21 C20 H20 110.6 . . ? 
N13 C21 N16 115.0(12) . . ? 
N13 C21 C20 104.3(13) . . ? 
N16 C21 C20 98.3(13) . . ? 
N13 C21 H21 112.7 . . ? 
N16 C21 H21 112.7 . . ? 
C20 C21 H21 112.7 . . ? 
O8 C22 N16 126.2(16) . . ? 
O8 C22 N15 123.8(17) . . ? 
N16 C22 N15 109.8(14) . . ? 
N14 C23 N17 112.8(11) . . ? 
N14 C23 H23A 109.0 . . ? 
N17 C23 H23A 109.0 . . ? 
N14 C23 H23B 109.0 . . ? 
N17 C23 H23B 109.0 . . ? 
H23A C23 H23B 107.8 . . ? 
N15 C24 N20 114.3(12) . . ? 
N15 C24 H24A 108.7 . . ? 
N20 C24 H24A 108.7 . . ? 
N15 C24 H24B 108.7 . . ? 
N20 C24 H24B 108.7 . . ? 
H24A C24 H24B 107.6 . . ? 
O9 C25 N17 126.9(14) . . ? 
O9 C25 N18 125.3(14) . . ? 
N17 C25 N18 107.7(14) . . ? 
N19 C26 N18 116.9(14) . . ? 
N19 C26 C27 103.6(14) . . ? 
N18 C26 C27 99.9(14) . . ? 
N19 C26 H26 111.8 . . ? 
N18 C26 H26 111.8 . . ? 
C27 C26 H26 111.8 . . ? 
N17 C27 N20 116.2(12) . . ? 
N17 C27 C26 105.5(13) . . ? 
N20 C27 C26 99.0(15) . . ? 
N17 C27 H27 111.8 . . ? 
N20 C27 H27 111.8 . . ? 
C26 C27 H27 111.8 . . ? 
O10 C28 N19 126.7(16) . . ? 
O10 C28 N20 123.8(14) . . ? 
N19 C28 N20 108.9(13) . . ? 
N1 C29 N18 109.2(11) . . ? 
N1 C29 H29A 109.8 . . ? 
N18 C29 H29A 109.8 . . ? 
N1 C29 H29B 109.8 . . ? 
N18 C29 H29B 109.8 . . ? 
H29A C29 H29B 108.3 . . ? 
N4 C30 N19 115.5(15) . . ? 
N4 C30 H30A 108.4 . . ? 
N19 C30 H30A 108.4 . . ? 
N4 C30 H30B 108.4 . . ? 
N19 C30 H30B 108.4 . . ? 
H30A C30 H30B 107.5 . . ? 
O11 C31 N22 128.9(13) . . ? 
O11 C31 N21 121.3(12) . . ? 
N22 C31 N21 109.6(11) . . ? 
N22 C32 N23 112.2(14) . . ? 
N22 C32 C33 99.1(15) . . ? 
N23 C32 C33 104.0(17) . . ? 
N22 C32 H32 113.4 . . ? 
N23 C32 H32 113.4 . . ? 
C33 C32 H32 113.4 . . ? 
N21 C33 N24 120.8(15) . . ? 
N21 C33 C32 105.0(14) . . ? 
N24 C33 C32 99.3(14) . . ? 
N21 C33 H33 110.3 . . ? 
N24 C33 H33 110.3 . . ? 
C32 C33 H33 110.3 . . ? 
O12 C34 N24 129(2) . . ? 
O12 C34 N23 120.8(19) . . ? 
N24 C34 N23 110.5(15) . . ? 
N22 C35 N25 118.7(12) . . ? 
N22 C35 H35A 107.6 . . ? 
N25 C35 H35A 107.6 . . ? 
N22 C35 H35B 107.6 . . ? 
N25 C35 H35B 107.6 . . ? 
H35A C35 H35B 107.1 . . ? 
N23 C36 N28 110.1(14) . . ? 
N23 C36 H36A 109.6 . . ? 
N28 C36 H36A 109.6 . . ? 
N23 C36 H36B 109.6 . . ? 
N28 C36 H36B 109.6 . . ? 
H36A C36 H36B 108.2 . . ? 
O13 C37 N25 130.0(14) . . ? 
O13 C37 N26 121.6(13) . . ? 
N25 C37 N26 108.4(11) . . ? 
N27 C38 N26 114.8(13) . . ? 
N27 C38 C39 107.0(14) . . ? 
N26 C38 C39 104.6(13) . . ? 
N27 C38 H38 110.1 . . ? 
N26 C38 H38 110.1 . . ? 
C39 C38 H38 110.1 . . ? 
N25 C39 N28 112.9(12) . . ? 
N25 C39 C38 103.9(13) . . ? 
N28 C39 C38 101.6(14) . . ? 
N25 C39 H39 112.5 . . ? 
N28 C39 H39 112.5 . . ? 
C38 C39 H39 112.5 . . ? 
O14 C40 N27 128.5(18) . . ? 
O14 C40 N28 124.7(18) . . ? 
N27 C40 N28 106.8(15) . . ? 
N26 C41 N29 112.9(11) . . ? 
N26 C41 H41A 109.0 . . ? 
N29 C41 H41A 109.0 . . ? 
N26 C41 H41B 109.0 . . ? 
N29 C41 H41B 109.0 . . ? 
H41A C41 H41B 107.8 . . ? 
N32 C42 N27 115.6(13) . . ? 
N32 C42 H42A 108.4 . . ? 
N27 C42 H42A 108.4 . . ? 
N32 C42 H42B 108.4 . . ? 
N27 C42 H42B 108.4 . . ? 
H42A C42 H42B 107.4 . . ? 
O15 C43 N30 129.2(15) . . ? 
O15 C43 N29 125.7(12) . . ? 
N30 C43 N29 105.0(11) . . ? 
N31 C44 N30 114.5(14) . . ? 
N31 C44 C45 108.3(15) . . ? 
N30 C44 C45 103.3(12) . . ? 
N31 C44 H44 110.2 . . ? 
N30 C44 H44 110.2 . . ? 
C45 C44 H44 110.2 . . ? 
N29 C45 C44 105.8(14) . . ? 
N29 C45 N32 112.1(11) . . ? 
C44 C45 N32 100.3(12) . . ? 
N29 C45 H45 112.6 . . ? 
C44 C45 H45 112.6 . . ? 
N32 C45 H45 112.6 . . ? 
O16 C46 N32 123.5(16) . . ? 
O16 C46 N31 128.7(14) . . ? 
N32 C46 N31 107.4(15) . . ? 
N33 C47 N30 109.6(14) . . ? 
N33 C47 H47A 109.7 . . ? 
N30 C47 H47A 109.7 . . ? 
N33 C47 H47B 109.7 . . ? 
N30 C47 H47B 109.7 . . ? 
H47A C47 H47B 108.2 . . ? 
N31 C48 N36 110.9(13) . . ? 
N31 C48 H48A 109.5 . . ? 
N36 C48 H48A 109.5 . . ? 
N31 C48 H48B 109.5 . . ? 
N36 C48 H48B 109.5 . . ? 
H48A C48 H48B 108.0 . . ? 
O17 C49 N33 129(2) . . ? 
O17 C49 N34 125.3(19) . . ? 
N33 C49 N34 105.8(14) . . ? 
N35 C50 N34 115.6(14) . . ? 
N35 C50 C51 104.8(15) . . ? 
N34 C50 C51 104.6(17) . . ? 
N35 C50 H50 110.5 . . ? 
N34 C50 H50 110.5 . . ? 
C51 C50 H50 110.5 . . ? 
N36 C51 N33 110.0(12) . . ? 
N36 C51 C50 102.1(16) . . ? 
N33 C51 C50 104.4(16) . . ? 
N36 C51 H51 113.1 . . ? 
N33 C51 H51 113.1 . . ? 
C50 C51 H51 113.1 . . ? 
O18 C52 N35 126.7(17) . . ? 
O18 C52 N36 123.9(16) . . ? 
N35 C52 N36 109.3(12) . . ? 
N34 C53 N37 117.1(10) . . ? 
N34 C53 H53A 108.0 . . ? 
N37 C53 H53A 108.0 . . ? 
N34 C53 H53B 108.0 . . ? 
N37 C53 H53B 108.0 . . ? 
H53A C53 H53B 107.3 . . ? 
N35 C54 N40 117.8(13) . . ? 
N35 C54 H54A 107.9 . . ? 
N40 C54 H54A 107.9 . . ? 
N35 C54 H54B 107.9 . . ? 
N40 C54 H54B 107.9 . . ? 
H54A C54 H54B 107.2 . . ? 
O19 C55 N38 124.4(15) . . ? 
O19 C55 N37 120.1(16) . . ? 
N38 C55 N37 115.0(15) . . ? 
N39 C56 N38 117.0(14) . . ? 
N39 C56 C57 102.9(15) . . ? 
N38 C56 C57 103.3(18) . . ? 
N39 C56 H56 111.0 . . ? 
N38 C56 H56 111.0 . . ? 
C57 C56 H56 111.0 . . ? 
N37 C57 N40 117.7(15) . . ? 
N37 C57 C56 101.0(14) . . ? 
N40 C57 C56 99.9(19) . . ? 
N37 C57 H57 112.3 . . ? 
N40 C57 H57 112.3 . . ? 
C56 C57 H57 112.3 . . ? 
O20 C58 N39 128.6(19) . . ? 
O20 C58 N40 125.4(17) . . ? 
N39 C58 N40 105.9(14) . . ? 
N38 C59 N21 114.9(12) . . ? 
N38 C59 H59A 108.5 . . ? 
N21 C59 H59A 108.5 . . ? 
N38 C59 H59B 108.5 . . ? 
N21 C59 H59B 108.5 . . ? 
H59A C59 H59B 107.5 . . ? 
N24 C60 N39 112.6(13) . . ? 
N24 C60 H60A 109.1 . . ? 
N39 C60 H60A 109.1 . . ? 
N24 C60 H60B 109.1 . . ? 
N39 C60 H60B 109.1 . . ? 
H60A C60 H60B 107.8 . . ? 

#===END

data_6
 
_audit_creation_method            SHELXL-97 
_chemical_name_systematic         ?
_chemical_name_common             ? 
_chemical_melting_point           ? 
_chemical_formula_moiety          ? 
_chemical_formula_sum             'C36 H50 Ce2 N27 O40 Re3' 
_chemical_formula_weight          2339.87 
 
loop_ 
 _atom_type_symbol 
 _atom_type_description 
 _atom_type_scat_dispersion_real 
 _atom_type_scat_dispersion_imag 
 _atom_type_scat_source 
 'C'  'C'   0.0033   0.0016 
 'International Tables Vol C Tables 4.2.6.8 and 6.1.1.4' 
 'H'  'H'   0.0000   0.0000 
 'International Tables Vol C Tables 4.2.6.8 and 6.1.1.4' 
 'N'  'N'   0.0061   0.0033 
 'International Tables Vol C Tables 4.2.6.8 and 6.1.1.4' 
 'O'  'O'   0.0106   0.0060 
 'International Tables Vol C Tables 4.2.6.8 and 6.1.1.4' 
 'Ce'  'Ce'  -0.2486   2.6331 
 'International Tables Vol C Tables 4.2.6.8 and 6.1.1.4' 
 'Re'  'Re'  -1.0185   7.2310 
 'International Tables Vol C Tables 4.2.6.8 and 6.1.1.4' 
 
_symmetry_cell_setting            orthorhombic
_symmetry_space_group_name_H-M    'P n a 21'
 
loop_ 
 _symmetry_equiv_pos_as_xyz 
 'x, y, z' 
 '-x, -y, z+1/2' 
 'x+1/2, -y+1/2, z' 
 '-x+1/2, y+1/2, z+1/2' 
 
_cell_length_a                    12.0805(3) 
_cell_length_b                    21.5528(7) 
_cell_length_c                    23.6878(8) 
_cell_angle_alpha                 90.00 
_cell_angle_beta                  90.00 
_cell_angle_gamma                 90.00 
_cell_volume                      6167.6(3) 
_cell_formula_units_Z             4 
_cell_measurement_temperature     100(2) 
_cell_measurement_reflns_used     104509 
_cell_measurement_theta_min       3.22
_cell_measurement_theta_max       25.68
 
_exptl_crystal_description        parallelepiped
_exptl_crystal_colour             colourless
_exptl_crystal_size_max           0.12
_exptl_crystal_size_mid           0.10
_exptl_crystal_size_min           0.07
_exptl_crystal_density_meas       ? 
_exptl_crystal_density_diffrn     2.520 
_exptl_crystal_density_method     'not measured' 
_exptl_crystal_F_000              4464 
_exptl_absorpt_coefficient_mu     7.444 
_exptl_absorpt_correction_type    'multi-scan'
_exptl_absorpt_correction_T_min   0.392
_exptl_absorpt_correction_T_max   0.594
_exptl_absorpt_process_details    
'SCALEPACK (Otwinowski & Minor, 1997)'  
_exptl_special_details
'crystal-to-detector distance 40 mm'
_diffrn_ambient_temperature       100(2)
_diffrn_radiation_wavelength      0.71073 
_diffrn_radiation_type            MoK\a 
_diffrn_radiation_source          'fine-focus sealed tube' 
_diffrn_radiation_monochromator   graphite 
_diffrn_measurement_device_type   
'Nonius Kappa-CCD area-detector diffractometer'  
_diffrn_measurement_method        
'two \f and two \w scans with 2\% steps (339 frames)' 
_diffrn_standards_interval_time   0
_diffrn_standards_number          0
_diffrn_standards_decay_%         0
_diffrn_reflns_number             104509 
_diffrn_reflns_av_R_equivalents   0.0424 
_diffrn_reflns_av_sigmaI/netI     0.0393 
_diffrn_reflns_limit_h_min        -14 
_diffrn_reflns_limit_h_max        14 
_diffrn_reflns_limit_k_min        -26 
_diffrn_reflns_limit_k_max        26 
_diffrn_reflns_limit_l_min        -28 
_diffrn_reflns_limit_l_max        28 
_diffrn_reflns_theta_min          3.22 
_diffrn_reflns_theta_max          25.68 
_reflns_number_total              11215 
_reflns_number_gt                 10371 
_reflns_threshold_expression      >2sigma(I) 
 
_computing_data_collection        'COLLECT (Nonius, 1998)'
_computing_cell_refinement        'HKL2000 (Otwinowski & Minor, 1997)'
_computing_data_reduction         'HKL2000 (Otwinowski & Minor, 1997)'
_computing_structure_solution     'SHELXS-97 (Sheldrick, 1997)' 
_computing_structure_refinement   'SHELXL-97 (Sheldrick, 1997)' 
_computing_molecular_graphics     'SHELXTL (Sheldrick, 1999)' 
_computing_publication_material   
'SHELXTL (Sheldrick, 1999); PLATON (Spek, 2003)' 
 
_refine_special_details 
;
 Structure solved by direct methods and subsequent Fourier-difference
 synthesis. All non-hydrogen atoms were refined with anisotropic
 displacement parameters, with restraints for four badly behaving atoms
 in the counter-ions and water solvent molecules. The H atoms bound to O 
 atoms were found on a Fourier-difference map, except those of O40, and 
 all the others were introduced at calculated positions. All were treated 
 as riding atoms with an isotropic displacement parameter equal to 1.2 
 times that of the parent atom.
 Refinement of F^2^ against ALL reflections.  The weighted R-factor wR and 
 goodness of fit S are based on F^2^, conventional R-factors R are based 
 on F, with F set to zero for negative F^2^. The threshold expression of 
 F^2^ > 2sigma(F^2^) is used only for calculating R-factors(gt) etc. and is 
 not relevant to the choice of reflections for refinement.  R-factors based 
 on F^2^ are statistically about twice as large as those based on F, and R- 
 factors based on ALL data will be even larger. 
;
_refine_ls_structure_factor_coef  Fsqd  
_refine_ls_matrix_type            full 
_refine_ls_weighting_scheme       calc  
_refine_ls_weighting_details 
 'calc w=1/[\s^2^(Fo^2^)+(0.0495P)^2^+46.8834P] where P=(Fo^2^+2Fc^2^)/3' 
_atom_sites_solution_primary      direct 
_atom_sites_solution_secondary    difmap 
_atom_sites_solution_hydrogens    geom 
_refine_ls_hydrogen_treatment     constr 
_refine_ls_extinction_method      none 
_refine_ls_extinction_coef        ? 
_refine_ls_abs_structure_details 
 'Flack H D (1983), Acta Cryst. A39, 876-881' 
_refine_ls_abs_structure_Flack    0.487(7) 
_refine_ls_number_reflns          11215 
_refine_ls_number_parameters      974 
_refine_ls_number_restraints      25 
_refine_ls_R_factor_all           0.0437 
_refine_ls_R_factor_gt            0.0385 
_refine_ls_wR_factor_ref          0.0954 
_refine_ls_wR_factor_gt           0.0927 
_refine_ls_goodness_of_fit_ref    1.044 
_refine_ls_restrained_S_all       1.048 
_refine_ls_shift/su_max           0.001 
_refine_ls_shift/su_mean          0.000 
_diffrn_measured_fraction_theta_max    0.998 
_diffrn_reflns_theta_full              25.68 
_diffrn_measured_fraction_theta_full   0.998 
_refine_diff_density_max    3.462 
_refine_diff_density_min   -5.125 
_refine_diff_density_rms    0.189 
 
loop_ 
 _atom_site_label 
 _atom_site_type_symbol 
 _atom_site_fract_x 
 _atom_site_fract_y 
 _atom_site_fract_z 
 _atom_site_U_iso_or_equiv 
 _atom_site_adp_type 
 _atom_site_occupancy 
 _atom_site_symmetry_multiplicity 
 _atom_site_calc_flag 
 _atom_site_refinement_flags 
 _atom_site_disorder_assembly 
 _atom_site_disorder_group 
Ce1 Ce 0.50940(5) 0.07840(3) 0.83472(3) 0.01950(13) Uani 1 1 d . . . 
Ce2 Ce -0.04533(4) -0.04293(3) 0.68407(2) 0.01947(13) Uani 1 1 d . . . 
Re1 Re 0.26367(3) -0.020818(18) 0.751649(19) 0.01977(10) Uani 1 1 d . . . 
Re2 Re 0.44037(7) 0.23690(3) 0.52164(3) 0.05786(19) Uani 1 1 d . . . 
Re3 Re 0.35221(3) 0.298748(19) 0.979850(18) 0.02195(10) Uani 1 1 d . . . 
O1 O 0.3671(6) 0.1644(4) 0.8097(3) 0.0241(16) Uani 1 1 d . . . 
O2 O -0.0700(6) 0.0608(3) 0.7357(3) 0.0246(17) Uani 1 1 d . . . 
O3 O 0.3832(6) 0.0855(3) 0.9191(3) 0.0234(16) Uani 1 1 d . . . 
O4 O -0.0160(6) -0.0497(3) 0.8486(3) 0.0256(17) Uani 1 1 d . . . 
O5 O 0.4624(6) -0.0335(3) 0.8680(3) 0.0248(17) Uani 1 1 d . . . 
O6 O 0.0829(6) -0.1984(3) 0.8548(3) 0.0235(16) Uani 1 1 d . . . 
O7 O 0.6023(5) -0.0915(3) 0.7338(3) 0.0194(15) Uani 1 1 d . . . 
O8 O 0.1588(6) -0.2223(3) 0.7294(3) 0.0229(16) Uani 1 1 d . . . 
O9 O 0.5849(6) -0.0152(4) 0.6128(4) 0.0301(18) Uani 1 1 d . . . 
O10 O 0.1160(6) -0.0987(3) 0.6314(3) 0.0227(16) Uani 1 1 d . . . 
O11 O 0.4465(6) 0.1021(3) 0.6636(3) 0.0252(17) Uani 1 1 d . . . 
O12 O -0.0147(6) 0.0394(3) 0.6148(3) 0.0238(17) Uani 1 1 d . . . 
O13 O 0.6000(6) 0.1593(4) 0.7653(4) 0.0324(19) Uani 1 1 d . . . 
O14 O 0.7134(6) 0.1166(3) 0.8244(4) 0.0303(18) Uani 1 1 d . . . 
O15 O 0.7739(7) 0.1855(4) 0.7654(4) 0.042(2) Uani 1 1 d . . . 
O16 O 0.6298(7) 0.0425(4) 0.9152(3) 0.0305(19) Uani 1 1 d . . . 
O17 O 0.6766(6) -0.0072(4) 0.8396(3) 0.0260(16) Uani 1 1 d . . . 
O18 O 0.7449(8) -0.0362(5) 0.9196(4) 0.048(3) Uani 1 1 d . . . 
O19 O -0.1061(8) -0.0739(4) 0.5824(4) 0.038(2) Uani 1 1 d . . . 
O20 O -0.1405(6) -0.1422(4) 0.6464(3) 0.0285(17) Uani 1 1 d . . . 
O21 O -0.1744(8) -0.1632(4) 0.5590(4) 0.041(2) Uani 1 1 d . . . 
O22 O 0.5559(6) 0.1765(4) 0.8901(4) 0.035(2) Uani 1 1 d . . . 
H22A H 0.5448 0.1569 0.9193 0.042 Uiso 1 1 d R . . 
H22B H 0.5135 0.2121 0.9009 0.042 Uiso 1 1 d R . . 
O23 O 0.5525(6) 0.0321(3) 0.7419(3) 0.0260(17) Uani 1 1 d . . . 
H23A H 0.5474 -0.0043 0.7412 0.031 Uiso 1 1 d R . . 
H23B H 0.5216 0.0419 0.7094 0.031 Uiso 1 1 d R . . 
O24 O 0.0298(6) -0.1228(3) 0.7482(3) 0.0228(15) Uani 1 1 d . . . 
H24A H 0.0871 -0.1477 0.7386 0.027 Uiso 1 1 d R . . 
H24B H -0.0022 -0.1453 0.7681 0.027 Uiso 1 1 d R . . 
O25 O -0.1795(6) -0.0719(3) 0.7609(3) 0.0295(18) Uani 1 1 d . . . 
H25A H -0.2419 -0.0741 0.7707 0.035 Uiso 1 1 d R . . 
H25B H -0.1602 -0.1122 0.7719 0.035 Uiso 1 1 d R . . 
O26 O -0.2268(6) 0.0061(4) 0.6641(4) 0.043(2) Uani 1 1 d . . . 
H26A H -0.2798 -0.0156 0.6510 0.052 Uiso 1 1 d R . . 
H26B H -0.2589 0.0356 0.6797 0.052 Uiso 1 1 d R . . 
O27 O 0.3226(6) 0.0390(3) 0.7903(3) 0.0249(17) Uani 1 1 d . . . 
O28 O 0.1409(6) 0.0015(3) 0.7201(3) 0.0223(16) Uani 1 1 d . . . 
O29 O 0.2397(6) -0.0828(4) 0.7952(4) 0.038(2) Uani 1 1 d . . . 
O30 O 0.3559(7) -0.0435(4) 0.7008(4) 0.038(2) Uani 1 1 d . . . 
O31 O 0.4594(13) 0.2139(7) 0.5893(6) 0.089(3) Uani 1 1 d U . . 
O32 O 0.3003(12) 0.2571(6) 0.5074(7) 0.089(3) Uani 1 1 d U . . 
O33 O 0.4465(10) 0.1718(5) 0.4805(6) 0.074(3) Uani 1 1 d . . . 
O34 O 0.5387(10) 0.2893(5) 0.4982(5) 0.065(3) Uani 1 1 d . . . 
O35 O 0.4197(7) 0.2716(4) 0.9199(4) 0.0349(19) Uani 1 1 d . . . 
O36 O 0.4042(7) 0.2618(4) 1.0388(4) 0.037(2) Uani 1 1 d . . . 
O37 O 0.2099(6) 0.2873(3) 0.9742(3) 0.0270(17) Uani 1 1 d . . . 
O38 O 0.3783(6) 0.3767(3) 0.9845(4) 0.0305(18) Uani 1 1 d . . . 
O39 O -0.2297(12) 0.1096(7) 0.5805(6) 0.095(4) Uani 1 1 d U . . 
H39A H -0.2608 0.1317 0.6028 0.114 Uiso 1 1 d R . . 
H39B H -0.1669 0.1272 0.5780 0.114 Uiso 1 1 d R . . 
O40 O 0.6418(12) 0.1884(7) 0.6471(7) 0.091(4) Uani 1 1 d U . . 
N1 N 0.2204(7) 0.1760(4) 0.7477(4) 0.0235(19) Uani 1 1 d . . . 
N2 N 0.1847(7) 0.1724(4) 0.8377(4) 0.0237(19) Uani 1 1 d . . . 
N3 N 0.0196(7) 0.1129(4) 0.8069(4) 0.0220(19) Uani 1 1 d . . . 
N4 N 0.0341(7) 0.1493(4) 0.7185(4) 0.026(2) Uani 1 1 d . . . 
N5 N 0.1961(7) 0.1011(4) 0.9180(4) 0.023(2) Uani 1 1 d . . . 
N6 N 0.2610(7) 0.0157(4) 0.9562(4) 0.024(2) Uani 1 1 d . . . 
N7 N 0.0954(8) -0.0415(4) 0.9279(4) 0.023(2) Uani 1 1 d . . . 
N8 N 0.0314(7) 0.0453(4) 0.8871(4) 0.022(2) Uani 1 1 d . . . 
N9 N 0.3526(7) -0.0814(4) 0.9347(4) 0.0219(19) Uani 1 1 d . . . 
N10 N 0.4245(7) -0.1387(4) 0.8655(4) 0.0161(17) Uani 1 1 d . . . 
N11 N 0.2727(8) -0.2124(4) 0.8688(4) 0.023(2) Uani 1 1 d . . . 
N12 N 0.1846(7) -0.1415(4) 0.9199(4) 0.0220(19) Uani 1 1 d . . . 
N13 N 0.4941(7) -0.1690(4) 0.7751(4) 0.0201(19) Uani 1 1 d . . . 
N14 N 0.5155(7) -0.1682(4) 0.6819(4) 0.0209(19) Uani 1 1 d . . . 
N15 N 0.3253(7) -0.2065(4) 0.6818(4) 0.0211(18) Uani 1 1 d . . . 
N16 N 0.3285(6) -0.2343(4) 0.7716(4) 0.0183(18) Uani 1 1 d . . . 
N17 N 0.4783(7) -0.1039(4) 0.5993(4) 0.0235(19) Uani 1 1 d . . . 
N18 N 0.4255(7) -0.0147(4) 0.5605(4) 0.0195(18) Uani 1 1 d . . . 
N19 N 0.2344(7) -0.0460(4) 0.5717(3) 0.0180(18) Uani 1 1 d . . . 
N20 N 0.2844(6) -0.1387(4) 0.6031(4) 0.0172(18) Uani 1 1 d . . . 
N21 N 0.3388(7) 0.0843(4) 0.5843(4) 0.024(2) Uani 1 1 d . . . 
N22 N 0.2745(7) 0.1459(4) 0.6521(4) 0.025(2) Uani 1 1 d . . . 
N23 N 0.0838(8) 0.1315(4) 0.6209(4) 0.026(2) Uani 1 1 d . . . 
N24 N 0.1458(7) 0.0549(4) 0.5667(4) 0.0201(19) Uani 1 1 d . . . 
N25 N 0.7010(7) 0.1545(4) 0.7852(5) 0.028(2) Uani 1 1 d . . . 
N26 N 0.6871(7) -0.0015(5) 0.8914(4) 0.027(2) Uani 1 1 d . . . 
N27 N -0.1415(8) -0.1277(4) 0.5955(4) 0.030(2) Uani 1 1 d . . . 
C1 C 0.2663(9) 0.1701(5) 0.7985(5) 0.024(2) Uani 1 1 d . . . 
C2 C 0.0759(9) 0.1747(5) 0.8126(5) 0.027(3) Uani 1 1 d . . . 
H2 H 0.0282 0.2058 0.8305 0.032 Uiso 1 1 calc R . . 
C3 C 0.1036(8) 0.1912(4) 0.7508(5) 0.022(2) Uani 1 1 d . . . 
H3 H 0.0889 0.2348 0.7421 0.027 Uiso 1 1 calc R . . 
C4 C -0.0114(9) 0.1032(5) 0.7528(5) 0.024(2) Uani 1 1 d . . . 
C5 C 0.2004(9) 0.1640(5) 0.8979(5) 0.023(2) Uani 1 1 d . . . 
H5A H 0.2717 0.1814 0.9082 0.028 Uiso 1 1 calc R . . 
H5B H 0.1441 0.1878 0.9175 0.028 Uiso 1 1 calc R . . 
C6 C -0.0373(9) 0.0828(5) 0.8531(5) 0.024(2) Uani 1 1 d . . . 
H6A H -0.0712 0.1143 0.8767 0.029 Uiso 1 1 calc R . . 
H6B H -0.0963 0.0573 0.8378 0.029 Uiso 1 1 calc R . . 
C7 C 0.2890(9) 0.0690(5) 0.9287(4) 0.022(2) Uani 1 1 d . . . 
C8 C 0.1406(9) 0.0088(5) 0.9621(5) 0.024(2) Uani 1 1 d . . . 
H8 H 0.1183 0.0052 1.0017 0.029 Uiso 1 1 calc R . . 
C9 C 0.0947(8) 0.0680(5) 0.9346(4) 0.020(2) Uani 1 1 d . . . 
H9 H 0.0492 0.0923 0.9608 0.024 Uiso 1 1 calc R . . 
C10 C 0.0317(9) -0.0187(5) 0.8833(4) 0.022(2) Uani 1 1 d . . . 
C11 C 0.3416(8) -0.0303(5) 0.9731(5) 0.023(2) Uani 1 1 d . . . 
H11A H 0.4131 -0.0102 0.9771 0.027 Uiso 1 1 calc R . . 
H11B H 0.3209 -0.0463 1.0099 0.027 Uiso 1 1 calc R . . 
C12 C 0.0935(8) -0.1068(5) 0.9430(4) 0.025(2) Uani 1 1 d . . . 
H12A H 0.0950 -0.1105 0.9838 0.030 Uiso 1 1 calc R . . 
H12B H 0.0247 -0.1249 0.9298 0.030 Uiso 1 1 calc R . . 
C13 C 0.4164(9) -0.0803(5) 0.8884(5) 0.025(2) Uani 1 1 d . . . 
C14 C 0.3612(8) -0.1826(5) 0.8992(5) 0.023(2) Uani 1 1 d . . . 
H14 H 0.4089 -0.2126 0.9185 0.028 Uiso 1 1 calc R . . 
C15 C 0.2992(9) -0.1413(5) 0.9406(4) 0.023(2) Uani 1 1 d . . . 
H15 H 0.3042 -0.1571 0.9793 0.028 Uiso 1 1 calc R . . 
C16 C 0.1693(9) -0.1854(5) 0.8778(5) 0.025(2) Uani 1 1 d . . . 
C17 C 0.5184(8) -0.1560(5) 0.8325(5) 0.021(2) Uani 1 1 d . . . 
H17A H 0.5723 -0.1226 0.8340 0.026 Uiso 1 1 calc R . . 
H17B H 0.5521 -0.1924 0.8493 0.026 Uiso 1 1 calc R . . 
C18 C 0.2900(9) -0.2586(5) 0.8245(4) 0.021(2) Uani 1 1 d . . . 
H18A H 0.3433 -0.2888 0.8380 0.025 Uiso 1 1 calc R . . 
H18B H 0.2207 -0.2802 0.8181 0.025 Uiso 1 1 calc R . . 
C19 C 0.5426(9) -0.1381(5) 0.7308(4) 0.023(2) Uani 1 1 d . . . 
C20 C 0.4396(8) -0.2199(5) 0.6919(5) 0.019(2) Uani 1 1 d . . . 
H20 H 0.4635 -0.2577 0.6724 0.023 Uiso 1 1 calc R . . 
C21 C 0.4449(8) -0.2271(5) 0.7569(4) 0.019(2) Uani 1 1 d . . . 
H21 H 0.4891 -0.2631 0.7683 0.022 Uiso 1 1 calc R . . 
C22 C 0.2624(9) -0.2196(5) 0.7285(5) 0.022(2) Uani 1 1 d . . . 
C23 C 0.5517(9) -0.1468(5) 0.6270(4) 0.022(2) Uani 1 1 d . . . 
H23C H 0.6234 -0.1271 0.6313 0.026 Uiso 1 1 calc R . . 
H23D H 0.5615 -0.1826 0.6028 0.026 Uiso 1 1 calc R . . 
C24 C 0.2741(8) -0.1998(5) 0.6276(5) 0.022(2) Uani 1 1 d . . . 
H24C H 0.1961 -0.2097 0.6311 0.026 Uiso 1 1 calc R . . 
H24D H 0.3067 -0.2297 0.6019 0.026 Uiso 1 1 calc R . . 
C25 C 0.5036(9) -0.0419(5) 0.5942(5) 0.025(2) Uani 1 1 d . . . 
C26 C 0.3406(8) -0.0578(5) 0.5436(5) 0.022(2) Uani 1 1 d . . . 
H26 H 0.3326 -0.0596 0.5024 0.026 Uiso 1 1 calc R . . 
C27 C 0.3804(10) -0.1191(5) 0.5678(5) 0.026(2) Uani 1 1 d . . . 
H27 H 0.3961 -0.1494 0.5380 0.031 Uiso 1 1 calc R . . 
C28 C 0.2034(8) -0.0945(5) 0.6045(4) 0.018(2) Uani 1 1 d . . . 
C29 C 0.4228(9) 0.0516(5) 0.5511(5) 0.023(2) Uani 1 1 d . . . 
H29A H 0.4091 0.0593 0.5114 0.028 Uiso 1 1 calc R . . 
H29B H 0.4949 0.0687 0.5602 0.028 Uiso 1 1 calc R . . 
C30 C 0.1533(9) -0.0066(5) 0.5433(5) 0.021(2) Uani 1 1 d . . . 
H30A H 0.1729 -0.0034 0.5037 0.026 Uiso 1 1 calc R . . 
H30B H 0.0812 -0.0262 0.5456 0.026 Uiso 1 1 calc R . . 
C31 C 0.3628(8) 0.1094(5) 0.6368(4) 0.019(2) Uani 1 1 d . . . 
C32 C 0.1928(8) 0.1523(5) 0.6067(5) 0.025(2) Uani 1 1 d . . . 
H32 H 0.1919 0.1944 0.5913 0.030 Uiso 1 1 calc R . . 
C33 C 0.2318(9) 0.1037(6) 0.5617(5) 0.031(3) Uani 1 1 d . . . 
H33 H 0.2370 0.1212 0.5236 0.037 Uiso 1 1 calc R . . 
C34 C 0.0646(9) 0.0711(5) 0.6031(5) 0.022(2) Uani 1 1 d . . . 
C35 C 0.2836(10) 0.1921(5) 0.6968(5) 0.026(3) Uani 1 1 d . . . 
H35A H 0.2575 0.2317 0.6826 0.032 Uiso 1 1 calc R . . 
H35B H 0.3610 0.1969 0.7068 0.032 Uiso 1 1 calc R . . 
C36 C 0.0066(8) 0.1594(5) 0.6601(5) 0.022(2) Uani 1 1 d . . . 
H36A H 0.0038 0.2037 0.6531 0.026 Uiso 1 1 calc R . . 
H36B H -0.0666 0.1427 0.6529 0.026 Uiso 1 1 calc R . . 
 
loop_ 
 _atom_site_aniso_label 
 _atom_site_aniso_U_11 
 _atom_site_aniso_U_22 
 _atom_site_aniso_U_33 
 _atom_site_aniso_U_23 
 _atom_site_aniso_U_13 
 _atom_site_aniso_U_12 
Ce1 0.0161(3) 0.0193(3) 0.0231(3) -0.0041(2) -0.0024(2) 0.0009(2) 
Ce2 0.0155(3) 0.0188(3) 0.0241(3) -0.0031(2) -0.0022(2) 0.0001(2) 
Re1 0.01633(19) 0.01861(19) 0.0244(2) -0.00291(18) -0.00416(19) 0.00089(15) 
Re2 0.0967(5) 0.0412(3) 0.0357(3) 0.0078(3) 0.0210(3) 0.0052(3) 
Re3 0.0222(2) 0.0216(2) 0.0220(2) -0.00030(18) 0.00296(18) -0.00006(16) 
O1 0.017(4) 0.027(4) 0.028(4) -0.001(3) -0.003(3) -0.001(3) 
O2 0.024(4) 0.023(4) 0.028(4) -0.008(3) -0.004(3) -0.003(3) 
O3 0.021(4) 0.025(4) 0.025(4) -0.005(3) -0.002(3) 0.005(3) 
O4 0.026(4) 0.024(4) 0.027(4) -0.006(3) 0.001(3) -0.004(3) 
O5 0.025(4) 0.026(4) 0.023(4) -0.007(3) -0.001(3) 0.006(3) 
O6 0.011(3) 0.023(4) 0.036(4) 0.000(3) -0.005(3) 0.000(3) 
O7 0.008(3) 0.024(4) 0.027(4) 0.001(3) 0.001(3) -0.009(3) 
O8 0.011(4) 0.026(4) 0.032(4) 0.000(3) -0.001(3) 0.001(3) 
O9 0.026(4) 0.024(4) 0.040(5) 0.001(3) -0.006(4) 0.000(3) 
O10 0.020(4) 0.026(4) 0.022(4) -0.002(3) 0.003(3) 0.005(3) 
O11 0.020(4) 0.027(4) 0.029(4) -0.001(3) -0.010(3) 0.001(3) 
O12 0.015(4) 0.025(4) 0.031(4) 0.001(3) -0.009(3) -0.002(3) 
O13 0.026(4) 0.027(4) 0.044(5) 0.004(4) -0.003(4) -0.001(3) 
O14 0.023(4) 0.022(4) 0.045(5) 0.006(4) -0.005(4) 0.008(3) 
O15 0.033(5) 0.031(5) 0.064(7) 0.011(4) 0.007(4) -0.005(4) 
O16 0.035(5) 0.038(5) 0.019(4) -0.011(4) -0.003(3) 0.010(4) 
O17 0.029(4) 0.035(4) 0.014(4) -0.002(3) -0.001(3) 0.001(3) 
O18 0.053(6) 0.053(6) 0.039(5) -0.007(5) -0.012(5) 0.031(5) 
O19 0.054(6) 0.022(4) 0.039(5) 0.012(4) -0.020(4) -0.014(4) 
O20 0.034(4) 0.027(4) 0.025(4) 0.004(3) 0.004(3) -0.004(3) 
O21 0.053(6) 0.040(5) 0.031(5) -0.002(4) -0.011(4) -0.017(4) 
O22 0.021(4) 0.038(5) 0.045(5) -0.008(4) -0.004(4) 0.003(3) 
O23 0.030(4) 0.022(4) 0.025(4) 0.004(3) 0.000(3) -0.005(3) 
O24 0.023(4) 0.022(4) 0.023(4) -0.003(3) 0.006(3) -0.001(3) 
O25 0.020(4) 0.031(4) 0.037(5) -0.013(4) 0.011(3) 0.000(3) 
O26 0.020(4) 0.027(4) 0.083(7) -0.003(5) -0.031(4) -0.001(3) 
O27 0.017(4) 0.020(4) 0.037(5) -0.008(3) -0.005(3) -0.004(3) 
O28 0.021(4) 0.020(4) 0.025(4) 0.002(3) -0.002(3) 0.002(3) 
O29 0.020(4) 0.039(5) 0.055(6) 0.021(4) -0.008(4) -0.014(4) 
O30 0.028(4) 0.046(5) 0.039(5) -0.023(4) 0.009(4) 0.006(4) 
O31 0.115(6) 0.074(5) 0.078(5) 0.009(5) -0.009(5) -0.015(5) 
O32 0.093(5) 0.078(5) 0.095(6) 0.013(5) 0.000(5) 0.002(5) 
O33 0.094(6) 0.060(5) 0.068(5) -0.003(5) 0.007(5) -0.019(5) 
O34 0.089(6) 0.043(5) 0.063(5) 0.007(4) -0.008(5) -0.013(4) 
O35 0.037(5) 0.039(5) 0.028(4) -0.002(4) 0.000(4) -0.005(4) 
O36 0.027(4) 0.052(6) 0.033(5) 0.011(4) -0.001(3) 0.005(4) 
O37 0.024(4) 0.026(4) 0.031(4) -0.008(4) 0.010(4) 0.002(3) 
O38 0.025(4) 0.026(4) 0.041(5) -0.010(4) 0.017(4) -0.005(3) 
O39 0.099(8) 0.087(7) 0.099(8) 0.012(7) -0.052(6) -0.025(6) 
O40 0.091(8) 0.076(7) 0.107(8) -0.012(6) -0.012(7) -0.010(6) 
N1 0.019(4) 0.024(5) 0.027(5) -0.001(4) 0.000(4) 0.005(3) 
N2 0.021(4) 0.023(5) 0.027(5) -0.005(4) -0.004(4) 0.003(4) 
N3 0.017(4) 0.020(5) 0.028(5) -0.003(4) 0.005(4) -0.004(4) 
N4 0.023(5) 0.021(5) 0.033(5) 0.002(4) -0.017(4) -0.004(4) 
N5 0.020(5) 0.026(5) 0.022(5) -0.008(4) -0.001(4) 0.011(4) 
N6 0.025(5) 0.024(5) 0.024(5) -0.008(4) -0.004(4) 0.006(4) 
N7 0.027(5) 0.022(5) 0.019(5) -0.007(4) 0.005(4) -0.006(4) 
N8 0.023(5) 0.019(5) 0.025(5) -0.001(4) -0.004(4) 0.000(4) 
N9 0.020(5) 0.019(5) 0.026(5) -0.003(4) 0.011(4) 0.003(4) 
N10 0.013(4) 0.011(4) 0.025(5) -0.003(3) 0.007(3) -0.002(3) 
N11 0.028(5) 0.021(5) 0.021(5) -0.001(4) -0.002(4) -0.003(4) 
N12 0.015(4) 0.029(5) 0.022(5) 0.000(4) 0.003(4) -0.010(4) 
N13 0.022(5) 0.017(4) 0.022(5) -0.002(4) 0.001(4) 0.000(4) 
N14 0.017(4) 0.019(5) 0.026(5) 0.000(4) -0.006(4) 0.003(3) 
N15 0.017(4) 0.027(5) 0.019(5) 0.004(4) 0.006(4) 0.000(3) 
N16 0.009(4) 0.019(4) 0.026(5) 0.001(4) 0.000(3) -0.001(3) 
N17 0.019(4) 0.027(5) 0.024(5) -0.002(4) 0.004(4) 0.002(4) 
N18 0.022(5) 0.019(5) 0.017(4) 0.001(4) -0.004(4) 0.000(4) 
N19 0.018(4) 0.023(5) 0.014(4) 0.001(4) -0.007(3) -0.006(4) 
N20 0.007(4) 0.025(5) 0.020(4) -0.002(4) 0.001(3) 0.000(3) 
N21 0.011(4) 0.032(5) 0.028(5) 0.004(4) 0.000(4) -0.004(4) 
N22 0.026(5) 0.024(5) 0.025(5) -0.008(4) -0.005(4) 0.001(4) 
N23 0.028(5) 0.014(5) 0.035(6) 0.006(4) -0.005(4) -0.004(4) 
N24 0.016(4) 0.016(4) 0.028(5) 0.001(4) -0.004(4) -0.002(3) 
N25 0.011(4) 0.017(5) 0.056(7) -0.001(5) 0.003(4) 0.003(4) 
N26 0.014(4) 0.037(6) 0.029(5) 0.004(4) -0.002(4) 0.006(4) 
N27 0.032(6) 0.027(6) 0.031(6) -0.009(4) 0.002(4) 0.003(4) 
C1 0.033(7) 0.013(5) 0.025(6) -0.009(4) -0.003(5) 0.006(4) 
C2 0.024(6) 0.026(6) 0.031(6) -0.007(5) 0.006(5) 0.002(5) 
C3 0.019(5) 0.013(5) 0.035(6) -0.002(5) -0.006(5) 0.004(4) 
C4 0.028(5) 0.017(5) 0.027(6) -0.006(5) -0.007(5) 0.009(4) 
C5 0.021(5) 0.019(5) 0.029(6) -0.013(5) -0.003(5) -0.001(4) 
C6 0.026(6) 0.020(6) 0.026(6) -0.006(4) 0.002(5) 0.006(4) 
C7 0.020(6) 0.027(6) 0.020(5) -0.010(5) 0.002(4) 0.010(5) 
C8 0.016(5) 0.033(6) 0.024(6) -0.008(5) -0.005(4) 0.007(5) 
C9 0.010(5) 0.026(6) 0.024(6) -0.006(4) 0.001(4) 0.001(4) 
C10 0.019(5) 0.035(6) 0.012(5) 0.004(5) -0.002(4) 0.003(5) 
C11 0.013(5) 0.030(6) 0.025(6) -0.006(5) -0.006(4) 0.000(4) 
C12 0.017(5) 0.043(7) 0.015(5) -0.005(5) 0.002(4) 0.008(5) 
C13 0.030(6) 0.026(6) 0.019(6) -0.001(5) -0.002(5) 0.001(5) 
C14 0.010(5) 0.035(6) 0.025(6) 0.003(5) 0.001(4) 0.003(4) 
C15 0.025(6) 0.029(6) 0.016(5) 0.002(4) -0.007(4) 0.002(5) 
C16 0.024(5) 0.029(5) 0.021(5) 0.009(4) 0.015(4) 0.004(4) 
C17 0.021(5) 0.021(5) 0.022(5) -0.006(5) -0.004(4) 0.000(4) 
C18 0.024(5) 0.022(5) 0.016(5) -0.002(4) 0.000(4) -0.003(4) 
C19 0.020(5) 0.029(6) 0.019(5) 0.002(4) 0.009(4) 0.012(5) 
C20 0.014(5) 0.014(5) 0.030(6) -0.004(4) -0.007(4) 0.009(4) 
C21 0.020(5) 0.018(5) 0.018(5) -0.005(4) 0.003(4) 0.003(4) 
C22 0.025(6) 0.016(5) 0.024(6) -0.003(4) 0.006(4) -0.007(4) 
C23 0.024(5) 0.020(6) 0.022(6) -0.005(4) 0.006(4) 0.002(4) 
C24 0.016(5) 0.025(6) 0.025(6) -0.009(5) -0.011(4) 0.012(4) 
C25 0.021(6) 0.032(6) 0.024(6) -0.005(5) 0.004(4) -0.004(5) 
C26 0.021(5) 0.023(6) 0.021(6) 0.005(4) -0.006(4) -0.006(4) 
C27 0.036(6) 0.025(6) 0.018(5) -0.007(4) 0.001(5) 0.000(5) 
C28 0.020(3) 0.017(3) 0.017(3) -0.004(2) -0.001(3) -0.004(2) 
C29 0.027(6) 0.023(6) 0.020(5) 0.004(4) 0.003(4) -0.006(4) 
C30 0.024(6) 0.019(5) 0.021(6) 0.002(4) -0.005(4) 0.001(4) 
C31 0.016(5) 0.017(5) 0.023(5) 0.003(4) 0.002(4) -0.004(4) 
C32 0.016(5) 0.024(6) 0.035(6) 0.001(5) -0.007(5) 0.008(4) 
C33 0.030(6) 0.038(7) 0.026(6) 0.002(5) -0.002(5) 0.006(5) 
C34 0.023(6) 0.016(5) 0.028(6) 0.001(4) -0.008(5) 0.011(4) 
C35 0.031(6) 0.016(5) 0.032(7) -0.001(5) -0.007(5) -0.008(5) 
C36 0.018(5) 0.020(5) 0.027(6) -0.002(4) -0.003(4) -0.002(4) 
 
_geom_special_details 
; 
 All esds (except the esd in the dihedral angle between two l.s. planes) 
 are estimated using the full covariance matrix.  The cell esds are taken 
 into account individually in the estimation of esds in distances, angles 
 and torsion angles; correlations between esds in cell parameters are only 
 used when they are defined by crystal symmetry.  An approximate (isotropic) 
 treatment of cell esds is used for estimating esds involving l.s. planes. 
;
loop_ 
 _geom_bond_atom_site_label_1 
 _geom_bond_atom_site_label_2 
 _geom_bond_distance 
 _geom_bond_site_symmetry_2 
 _geom_bond_publ_flag 
Ce1 O23 2.469(8) . ? 
Ce1 O3 2.518(7) . ? 
Ce1 O16 2.519(8) . ? 
Ce1 O22 2.551(8) . ? 
Ce1 O1 2.596(7) . ? 
Ce1 O5 2.599(8) . ? 
Ce1 O14 2.609(8) . ? 
Ce1 O27 2.631(7) . ? 
Ce1 O13 2.635(8) . ? 
Ce1 O17 2.739(8) . ? 
Ce2 O12 2.446(8) . ? 
Ce2 O24 2.469(7) . ? 
Ce2 O26 2.479(8) . ? 
Ce2 O25 2.516(7) . ? 
Ce2 O2 2.565(7) . ? 
Ce2 O20 2.587(8) . ? 
Ce2 O28 2.589(7) . ? 
Ce2 O19 2.605(8) . ? 
Ce2 O10 2.607(7) . ? 
Re1 O30 1.712(8) . ? 
Re1 O29 1.714(8) . ? 
Re1 O28 1.729(7) . ? 
Re1 O27 1.735(7) . ? 
Re2 O31 1.694(14) . ? 
Re2 O33 1.710(12) . ? 
Re2 O34 1.730(11) . ? 
Re2 O32 1.779(15) . ? 
Re3 O38 1.714(7) . ? 
Re3 O36 1.727(8) . ? 
Re3 O37 1.741(7) . ? 
Re3 O35 1.738(8) . ? 
O1 C1 1.253(13) . ? 
O2 C4 1.226(13) . ? 
O3 C7 1.213(13) . ? 
O4 C10 1.207(13) . ? 
O5 C13 1.249(14) . ? 
O6 C16 1.210(14) . ? 
O7 C19 1.237(14) . ? 
O8 C22 1.253(13) . ? 
O9 C25 1.222(13) . ? 
O10 C28 1.237(12) . ? 
O11 C31 1.204(12) . ? 
O12 C34 1.209(13) . ? 
O13 N25 1.313(12) . ? 
O14 N25 1.245(12) . ? 
O15 N25 1.201(13) . ? 
O16 N26 1.302(12) . ? 
O17 N26 1.241(12) . ? 
O18 N26 1.222(13) . ? 
O19 N27 1.276(13) . ? 
O20 N27 1.246(13) . ? 
O21 N27 1.221(12) . ? 
O22 H22A 0.8216 . ? 
O22 H22B 0.9574 . ? 
O23 H23A 0.7875 . ? 
O23 H23B 0.8816 . ? 
O24 H24A 0.9052 . ? 
O24 H24B 0.7788 . ? 
O25 H25A 0.7909 . ? 
O25 H25B 0.9350 . ? 
O26 H26A 0.8503 . ? 
O26 H26B 0.8307 . ? 
O39 H39A 0.8042 . ? 
O39 H39B 0.8502 . ? 
N1 C1 1.331(15) . ? 
N1 C3 1.451(13) . ? 
N1 C35 1.469(15) . ? 
N2 C1 1.355(15) . ? 
N2 C2 1.444(14) . ? 
N2 C5 1.450(15) . ? 
N3 C4 1.353(15) . ? 
N3 C6 1.447(14) . ? 
N3 C2 1.501(14) . ? 
N4 C4 1.394(15) . ? 
N4 C36 1.441(14) . ? 
N4 C3 1.451(13) . ? 
N5 C7 1.343(13) . ? 
N5 C5 1.437(14) . ? 
N5 C9 1.472(14) . ? 
N6 C7 1.363(15) . ? 
N6 C11 1.447(14) . ? 
N6 C8 1.468(14) . ? 
N7 C10 1.395(14) . ? 
N7 C12 1.453(15) . ? 
N7 C8 1.459(14) . ? 
N8 C10 1.383(14) . ? 
N8 C6 1.410(14) . ? 
N8 C9 1.445(13) . ? 
N9 C13 1.341(14) . ? 
N9 C11 1.436(14) . ? 
N9 C15 1.451(14) . ? 
N10 C13 1.374(14) . ? 
N10 C17 1.427(13) . ? 
N10 C14 1.455(14) . ? 
N11 C16 1.394(14) . ? 
N11 C14 1.440(14) . ? 
N11 C18 1.461(14) . ? 
N12 C16 1.385(15) . ? 
N12 C12 1.438(13) . ? 
N12 C15 1.469(14) . ? 
N13 C19 1.374(14) . ? 
N13 C17 1.419(14) . ? 
N13 C21 1.454(13) . ? 
N14 C19 1.368(14) . ? 
N14 C23 1.447(14) . ? 
N14 C20 1.462(13) . ? 
N15 C22 1.372(14) . ? 
N15 C20 1.431(12) . ? 
N15 C24 1.432(14) . ? 
N16 C22 1.334(14) . ? 
N16 C18 1.436(13) . ? 
N16 C21 1.456(12) . ? 
N17 C25 1.375(15) . ? 
N17 C27 1.437(14) . ? 
N17 C23 1.441(14) . ? 
N18 C25 1.368(14) . ? 
N18 C26 1.441(13) . ? 
N18 C29 1.446(14) . ? 
N19 C28 1.355(13) . ? 
N19 C30 1.460(13) . ? 
N19 C26 1.467(14) . ? 
N20 C28 1.366(13) . ? 
N20 C24 1.444(14) . ? 
N20 C27 1.491(14) . ? 
N21 C31 1.388(14) . ? 
N21 C33 1.460(14) . ? 
N21 C29 1.463(14) . ? 
N22 C31 1.374(14) . ? 
N22 C35 1.456(14) . ? 
N22 C32 1.466(14) . ? 
N23 C34 1.389(14) . ? 
N23 C32 1.431(14) . ? 
N23 C36 1.445(14) . ? 
N24 C34 1.352(14) . ? 
N24 C30 1.440(13) . ? 
N24 C33 1.482(15) . ? 
C2 C3 1.543(17) . ? 
C2 H2 0.9800 . ? 
C3 H3 0.9800 . ? 
C5 H5A 0.9700 . ? 
C5 H5B 0.9700 . ? 
C6 H6A 0.9700 . ? 
C6 H6B 0.9700 . ? 
C8 C9 1.537(15) . ? 
C8 H8 0.9800 . ? 
C9 H9 0.9800 . ? 
C11 H11A 0.9700 . ? 
C11 H11B 0.9700 . ? 
C12 H12A 0.9700 . ? 
C12 H12B 0.9700 . ? 
C14 C15 1.521(15) . ? 
C14 H14 0.9800 . ? 
C15 H15 0.9800 . ? 
C17 H17A 0.9700 . ? 
C17 H17B 0.9700 . ? 
C18 H18A 0.9700 . ? 
C18 H18B 0.9700 . ? 
C20 C21 1.548(15) . ? 
C20 H20 0.9800 . ? 
C21 H21 0.9800 . ? 
C23 H23C 0.9700 . ? 
C23 H23D 0.9700 . ? 
C24 H24C 0.9700 . ? 
C24 H24D 0.9700 . ? 
C26 C27 1.520(15) . ? 
C26 H26 0.9800 . ? 
C27 H27 0.9800 . ? 
C29 H29A 0.9700 . ? 
C29 H29B 0.9700 . ? 
C30 H30A 0.9700 . ? 
C30 H30B 0.9700 . ? 
C32 C33 1.566(17) . ? 
C32 H32 0.9800 . ? 
C33 H33 0.9800 . ? 
C35 H35A 0.9700 . ? 
C35 H35B 0.9700 . ? 
C36 H36A 0.9700 . ? 
C36 H36B 0.9700 . ? 
 
loop_ 
 _geom_angle_atom_site_label_1 
 _geom_angle_atom_site_label_2 
 _geom_angle_atom_site_label_3 
 _geom_angle 
 _geom_angle_site_symmetry_1 
 _geom_angle_site_symmetry_3 
 _geom_angle_publ_flag 
O23 Ce1 O3 149.2(2) . . ? 
O23 Ce1 O16 115.3(2) . . ? 
O3 Ce1 O16 76.6(2) . . ? 
O23 Ce1 O22 138.3(3) . . ? 
O3 Ce1 O22 71.0(3) . . ? 
O16 Ce1 O22 74.8(3) . . ? 
O23 Ce1 O1 103.0(2) . . ? 
O3 Ce1 O1 74.7(2) . . ? 
O16 Ce1 O1 140.7(2) . . ? 
O22 Ce1 O1 70.8(2) . . ? 
O23 Ce1 O5 86.6(2) . . ? 
O3 Ce1 O5 71.6(2) . . ? 
O16 Ce1 O5 67.2(3) . . ? 
O22 Ce1 O5 131.4(3) . . ? 
O1 Ce1 O5 126.0(2) . . ? 
O23 Ce1 O14 81.1(2) . . ? 
O3 Ce1 O14 128.8(3) . . ? 
O16 Ce1 O14 67.8(3) . . ? 
O22 Ce1 O14 65.1(2) . . ? 
O1 Ce1 O14 112.2(2) . . ? 
O5 Ce1 O14 121.8(2) . . ? 
O23 Ce1 O27 72.2(2) . . ? 
O3 Ce1 O27 79.5(2) . . ? 
O16 Ce1 O27 134.3(3) . . ? 
O22 Ce1 O27 131.4(2) . . ? 
O1 Ce1 O27 64.6(2) . . ? 
O5 Ce1 O27 68.6(2) . . ? 
O14 Ce1 O27 151.0(3) . . ? 
O23 Ce1 O13 67.9(2) . . ? 
O3 Ce1 O13 135.0(2) . . ? 
O16 Ce1 O13 115.8(3) . . ? 
O22 Ce1 O13 71.4(3) . . ? 
O1 Ce1 O13 70.1(2) . . ? 
O5 Ce1 O13 153.3(2) . . ? 
O14 Ce1 O13 48.7(2) . . ? 
O27 Ce1 O13 108.7(2) . . ? 
O23 Ce1 O17 67.0(2) . . ? 
O3 Ce1 O17 117.0(2) . . ? 
O16 Ce1 O17 48.4(2) . . ? 
O22 Ce1 O17 112.0(2) . . ? 
O1 Ce1 O17 168.2(2) . . ? 
O5 Ce1 O17 61.5(2) . . ? 
O14 Ce1 O17 61.3(2) . . ? 
O27 Ce1 O17 115.6(2) . . ? 
O13 Ce1 O17 99.5(2) . . ? 
O12 Ce2 O24 149.7(2) . . ? 
O12 Ce2 O26 72.3(3) . . ? 
O24 Ce2 O26 137.7(3) . . ? 
O12 Ce2 O25 139.7(2) . . ? 
O24 Ce2 O25 67.6(2) . . ? 
O26 Ce2 O25 71.0(3) . . ? 
O12 Ce2 O2 72.8(3) . . ? 
O24 Ce2 O2 110.9(2) . . ? 
O26 Ce2 O2 67.5(3) . . ? 
O25 Ce2 O2 78.3(2) . . ? 
O12 Ce2 O20 115.9(2) . . ? 
O24 Ce2 O20 78.4(2) . . ? 
O26 Ce2 O20 83.9(3) . . ? 
O25 Ce2 O20 76.0(2) . . ? 
O2 Ce2 O20 146.4(2) . . ? 
O12 Ce2 O28 79.7(2) . . ? 
O24 Ce2 O28 74.7(2) . . ? 
O26 Ce2 O28 132.3(3) . . ? 
O25 Ce2 O28 114.4(2) . . ? 
O2 Ce2 O28 67.8(2) . . ? 
O20 Ce2 O28 143.6(2) . . ? 
O12 Ce2 O19 66.9(2) . . ? 
O24 Ce2 O19 119.6(2) . . ? 
O26 Ce2 O19 71.5(3) . . ? 
O25 Ce2 O19 115.1(3) . . ? 
O2 Ce2 O19 129.1(2) . . ? 
O20 Ce2 O19 49.0(2) . . ? 
O28 Ce2 O19 130.1(3) . . ? 
O12 Ce2 O10 84.3(2) . . ? 
O24 Ce2 O10 72.4(2) . . ? 
O26 Ce2 O10 140.0(3) . . ? 
O25 Ce2 O10 135.5(2) . . ? 
O2 Ce2 O10 135.8(2) . . ? 
O20 Ce2 O10 77.7(2) . . ? 
O28 Ce2 O10 71.2(2) . . ? 
O19 Ce2 O10 69.5(3) . . ? 
O30 Re1 O29 108.2(5) . . ? 
O30 Re1 O28 109.4(4) . . ? 
O29 Re1 O28 109.4(4) . . ? 
O30 Re1 O27 108.5(4) . . ? 
O29 Re1 O27 109.3(4) . . ? 
O28 Re1 O27 111.9(4) . . ? 
O31 Re2 O33 107.1(7) . . ? 
O31 Re2 O34 113.7(6) . . ? 
O33 Re2 O34 108.8(6) . . ? 
O31 Re2 O32 112.3(7) . . ? 
O33 Re2 O32 97.7(7) . . ? 
O34 Re2 O32 115.6(6) . . ? 
O38 Re3 O36 109.5(4) . . ? 
O38 Re3 O37 109.0(3) . . ? 
O36 Re3 O37 110.8(4) . . ? 
O38 Re3 O35 107.2(4) . . ? 
O36 Re3 O35 109.6(4) . . ? 
O37 Re3 O35 110.7(4) . . ? 
C1 O1 Ce1 139.7(7) . . ? 
C4 O2 Ce2 137.8(7) . . ? 
C7 O3 Ce1 134.4(7) . . ? 
C13 O5 Ce1 164.5(7) . . ? 
C28 O10 Ce2 148.4(7) . . ? 
C34 O12 Ce2 133.1(7) . . ? 
N25 O13 Ce1 96.3(6) . . ? 
N25 O14 Ce1 99.4(6) . . ? 
N26 O16 Ce1 101.7(6) . . ? 
N26 O17 Ce1 92.8(6) . . ? 
N27 O19 Ce2 95.8(6) . . ? 
N27 O20 Ce2 97.5(6) . . ? 
Ce1 O22 H22A 88.2 . . ? 
Ce1 O22 H22B 133.2 . . ? 
H22A O22 H22B 95.7 . . ? 
Ce1 O23 H23A 113.9 . . ? 
Ce1 O23 H23B 126.4 . . ? 
H23A O23 H23B 100.7 . . ? 
Ce2 O24 H24A 122.7 . . ? 
Ce2 O24 H24B 128.6 . . ? 
H24A O24 H24B 99.4 . . ? 
Ce2 O25 H25A 147.3 . . ? 
Ce2 O25 H25B 105.7 . . ? 
H25A O25 H25B 95.8 . . ? 
Ce2 O26 H26A 120.1 . . ? 
Ce2 O26 H26B 130.9 . . ? 
H26A O26 H26B 103.3 . . ? 
Re1 O27 Ce1 143.4(4) . . ? 
Re1 O28 Ce2 141.7(4) . . ? 
H39A O39 H39B 101.3 . . ? 
C1 N1 C3 112.4(9) . . ? 
C1 N1 C35 123.3(9) . . ? 
C3 N1 C35 119.6(9) . . ? 
C1 N2 C2 112.4(9) . . ? 
C1 N2 C5 125.1(9) . . ? 
C2 N2 C5 121.9(9) . . ? 
C4 N3 C6 121.1(9) . . ? 
C4 N3 C2 110.4(9) . . ? 
C6 N3 C2 123.1(9) . . ? 
C4 N4 C36 125.2(9) . . ? 
C4 N4 C3 111.4(9) . . ? 
C36 N4 C3 123.1(9) . . ? 
C7 N5 C5 121.2(9) . . ? 
C7 N5 C9 113.3(9) . . ? 
C5 N5 C9 125.1(8) . . ? 
C7 N6 C11 122.9(9) . . ? 
C7 N6 C8 112.2(9) . . ? 
C11 N6 C8 124.8(9) . . ? 
C10 N7 C12 121.2(9) . . ? 
C10 N7 C8 111.4(9) . . ? 
C12 N7 C8 126.1(9) . . ? 
C10 N8 C6 122.4(9) . . ? 
C10 N8 C9 112.7(8) . . ? 
C6 N8 C9 124.2(9) . . ? 
C13 N9 C11 123.9(10) . . ? 
C13 N9 C15 110.6(9) . . ? 
C11 N9 C15 125.5(9) . . ? 
C13 N10 C17 120.8(8) . . ? 
C13 N10 C14 110.0(8) . . ? 
C17 N10 C14 123.3(8) . . ? 
C16 N11 C14 113.7(9) . . ? 
C16 N11 C18 121.5(9) . . ? 
C14 N11 C18 123.8(9) . . ? 
C16 N12 C12 121.8(9) . . ? 
C16 N12 C15 111.6(9) . . ? 
C12 N12 C15 126.3(9) . . ? 
C19 N13 C17 123.2(9) . . ? 
C19 N13 C21 111.5(9) . . ? 
C17 N13 C21 122.7(9) . . ? 
C19 N14 C23 122.5(9) . . ? 
C19 N14 C20 112.0(9) . . ? 
C23 N14 C20 125.3(9) . . ? 
C22 N15 C20 111.0(9) . . ? 
C22 N15 C24 120.3(9) . . ? 
C20 N15 C24 125.9(9) . . ? 
C22 N16 C18 124.1(8) . . ? 
C22 N16 C21 111.7(9) . . ? 
C18 N16 C21 124.1(8) . . ? 
C25 N17 C27 111.1(9) . . ? 
C25 N17 C23 121.8(9) . . ? 
C27 N17 C23 126.6(9) . . ? 
C25 N18 C26 112.2(9) . . ? 
C25 N18 C29 122.0(9) . . ? 
C26 N18 C29 125.3(8) . . ? 
C28 N19 C30 121.8(8) . . ? 
C28 N19 C26 111.6(8) . . ? 
C30 N19 C26 118.6(8) . . ? 
C28 N20 C24 124.4(8) . . ? 
C28 N20 C27 111.9(9) . . ? 
C24 N20 C27 123.4(8) . . ? 
C31 N21 C33 113.6(9) . . ? 
C31 N21 C29 121.6(8) . . ? 
C33 N21 C29 123.8(9) . . ? 
C31 N22 C35 121.6(9) . . ? 
C31 N22 C32 112.5(9) . . ? 
C35 N22 C32 121.3(9) . . ? 
C34 N23 C32 112.0(9) . . ? 
C34 N23 C36 118.6(9) . . ? 
C32 N23 C36 127.9(9) . . ? 
C34 N24 C30 121.9(9) . . ? 
C34 N24 C33 112.1(9) . . ? 
C30 N24 C33 125.4(9) . . ? 
O15 N25 O14 124.7(10) . . ? 
O15 N25 O13 119.8(10) . . ? 
O14 N25 O13 115.6(9) . . ? 
O18 N26 O17 122.5(10) . . ? 
O18 N26 O16 121.0(9) . . ? 
O17 N26 O16 116.5(9) . . ? 
O21 N27 O20 122.1(10) . . ? 
O21 N27 O19 120.4(10) . . ? 
O20 N27 O19 117.5(9) . . ? 
O1 C1 N1 127.2(10) . . ? 
O1 C1 N2 124.5(10) . . ? 
N1 C1 N2 108.3(9) . . ? 
N2 C2 N3 114.7(9) . . ? 
N2 C2 C3 101.6(8) . . ? 
N3 C2 C3 102.5(8) . . ? 
N2 C2 H2 112.4 . . ? 
N3 C2 H2 112.4 . . ? 
C3 C2 H2 112.4 . . ? 
N1 C3 N4 113.3(9) . . ? 
N1 C3 C2 102.0(9) . . ? 
N4 C3 C2 103.4(9) . . ? 
N1 C3 H3 112.4 . . ? 
N4 C3 H3 112.4 . . ? 
C2 C3 H3 112.4 . . ? 
O2 C4 N3 126.0(11) . . ? 
O2 C4 N4 124.6(10) . . ? 
N3 C4 N4 109.4(9) . . ? 
N5 C5 N2 116.0(8) . . ? 
N5 C5 H5A 108.3 . . ? 
N2 C5 H5A 108.3 . . ? 
N5 C5 H5B 108.3 . . ? 
N2 C5 H5B 108.3 . . ? 
H5A C5 H5B 107.4 . . ? 
N8 C6 N3 114.1(9) . . ? 
N8 C6 H6A 108.7 . . ? 
N3 C6 H6A 108.7 . . ? 
N8 C6 H6B 108.7 . . ? 
N3 C6 H6B 108.7 . . ? 
H6A C6 H6B 107.6 . . ? 
O3 C7 N5 126.6(11) . . ? 
O3 C7 N6 124.7(10) . . ? 
N5 C7 N6 108.5(9) . . ? 
N7 C8 N6 113.1(9) . . ? 
N7 C8 C9 104.3(8) . . ? 
N6 C8 C9 103.5(9) . . ? 
N7 C8 H8 111.8 . . ? 
N6 C8 H8 111.8 . . ? 
C9 C8 H8 111.8 . . ? 
N8 C9 N5 113.4(9) . . ? 
N8 C9 C8 103.9(8) . . ? 
N5 C9 C8 102.4(8) . . ? 
N8 C9 H9 112.2 . . ? 
N5 C9 H9 112.2 . . ? 
C8 C9 H9 112.2 . . ? 
O4 C10 N8 126.5(10) . . ? 
O4 C10 N7 125.8(10) . . ? 
N8 C10 N7 107.7(9) . . ? 
N9 C11 N6 114.3(9) . . ? 
N9 C11 H11A 108.7 . . ? 
N6 C11 H11A 108.7 . . ? 
N9 C11 H11B 108.7 . . ? 
N6 C11 H11B 108.7 . . ? 
H11A C11 H11B 107.6 . . ? 
N12 C12 N7 113.5(9) . . ? 
N12 C12 H12A 108.9 . . ? 
N7 C12 H12A 108.9 . . ? 
N12 C12 H12B 108.9 . . ? 
N7 C12 H12B 108.9 . . ? 
H12A C12 H12B 107.7 . . ? 
O5 C13 N9 126.0(10) . . ? 
O5 C13 N10 123.8(10) . . ? 
N9 C13 N10 110.3(10) . . ? 
N11 C14 N10 113.9(9) . . ? 
N11 C14 C15 102.6(8) . . ? 
N10 C14 C15 103.4(9) . . ? 
N11 C14 H14 112.1 . . ? 
N10 C14 H14 112.1 . . ? 
C15 C14 H14 112.1 . . ? 
N9 C15 N12 113.0(9) . . ? 
N9 C15 C14 103.8(9) . . ? 
N12 C15 C14 104.3(8) . . ? 
N9 C15 H15 111.7 . . ? 
N12 C15 H15 111.7 . . ? 
C14 C15 H15 111.7 . . ? 
O6 C16 N12 126.6(10) . . ? 
O6 C16 N11 127.4(11) . . ? 
N12 C16 N11 106.0(9) . . ? 
N13 C17 N10 114.4(9) . . ? 
N13 C17 H17A 108.7 . . ? 
N10 C17 H17A 108.7 . . ? 
N13 C17 H17B 108.7 . . ? 
N10 C17 H17B 108.7 . . ? 
H17A C17 H17B 107.6 . . ? 
N16 C18 N11 115.1(8) . . ? 
N16 C18 H18A 108.5 . . ? 
N11 C18 H18A 108.5 . . ? 
N16 C18 H18B 108.5 . . ? 
N11 C18 H18B 108.5 . . ? 
H18A C18 H18B 107.5 . . ? 
O7 C19 N14 124.9(9) . . ? 
O7 C19 N13 126.7(10) . . ? 
N14 C19 N13 108.3(9) . . ? 
N15 C20 N14 115.1(8) . . ? 
N15 C20 C21 103.1(8) . . ? 
N14 C20 C21 102.3(8) . . ? 
N15 C20 H20 111.9 . . ? 
N14 C20 H20 111.9 . . ? 
C21 C20 H20 111.9 . . ? 
N13 C21 N16 114.5(8) . . ? 
N13 C21 C20 103.0(8) . . ? 
N16 C21 C20 102.1(8) . . ? 
N13 C21 H21 112.1 . . ? 
N16 C21 H21 112.1 . . ? 
C20 C21 H21 112.1 . . ? 
O8 C22 N16 125.0(10) . . ? 
O8 C22 N15 125.2(10) . . ? 
N16 C22 N15 109.6(9) . . ? 
N17 C23 N14 115.4(8) . . ? 
N17 C23 H23C 108.4 . . ? 
N14 C23 H23C 108.4 . . ? 
N17 C23 H23D 108.4 . . ? 
N14 C23 H23D 108.4 . . ? 
H23C C23 H23D 107.5 . . ? 
N15 C24 N20 114.5(9) . . ? 
N15 C24 H24C 108.6 . . ? 
N20 C24 H24C 108.6 . . ? 
N15 C24 H24D 108.6 . . ? 
N20 C24 H24D 108.6 . . ? 
H24C C24 H24D 107.6 . . ? 
O9 C25 N18 124.2(10) . . ? 
O9 C25 N17 127.3(11) . . ? 
N18 C25 N17 108.3(9) . . ? 
N18 C26 N19 112.6(9) . . ? 
N18 C26 C27 103.3(8) . . ? 
N19 C26 C27 104.8(8) . . ? 
N18 C26 H26 111.9 . . ? 
N19 C26 H26 111.9 . . ? 
C27 C26 H26 111.9 . . ? 
N17 C27 N20 114.4(9) . . ? 
N17 C27 C26 104.9(9) . . ? 
N20 C27 C26 102.2(9) . . ? 
N17 C27 H27 111.6 . . ? 
N20 C27 H27 111.6 . . ? 
C26 C27 H27 111.6 . . ? 
O10 C28 N19 126.0(10) . . ? 
O10 C28 N20 124.9(9) . . ? 
N19 C28 N20 109.1(9) . . ? 
N18 C29 N21 114.1(8) . . ? 
N18 C29 H29A 108.7 . . ? 
N21 C29 H29A 108.7 . . ? 
N18 C29 H29B 108.7 . . ? 
N21 C29 H29B 108.7 . . ? 
H29A C29 H29B 107.6 . . ? 
N24 C30 N19 113.6(9) . . ? 
N24 C30 H30A 108.8 . . ? 
N19 C30 H30A 108.8 . . ? 
N24 C30 H30B 108.8 . . ? 
N19 C30 H30B 108.8 . . ? 
H30A C30 H30B 107.7 . . ? 
O11 C31 N22 125.9(10) . . ? 
O11 C31 N21 126.7(10) . . ? 
N22 C31 N21 107.3(9) . . ? 
N23 C32 N22 114.7(10) . . ? 
N23 C32 C33 103.2(9) . . ? 
N22 C32 C33 103.5(8) . . ? 
N23 C32 H32 111.6 . . ? 
N22 C32 H32 111.6 . . ? 
C33 C32 H32 111.6 . . ? 
N21 C33 N24 112.8(9) . . ? 
N21 C33 C32 102.1(9) . . ? 
N24 C33 C32 102.1(9) . . ? 
N21 C33 H33 112.9 . . ? 
N24 C33 H33 112.9 . . ? 
C32 C33 H33 112.9 . . ? 
O12 C34 N24 125.2(10) . . ? 
O12 C34 N23 126.2(10) . . ? 
N24 C34 N23 108.4(10) . . ? 
N22 C35 N1 113.3(9) . . ? 
N22 C35 H35A 108.9 . . ? 
N1 C35 H35A 108.9 . . ? 
N22 C35 H35B 108.9 . . ? 
N1 C35 H35B 108.9 . . ? 
H35A C35 H35B 107.7 . . ? 
N4 C36 N23 113.9(9) . . ? 
N4 C36 H36A 108.8 . . ? 
N23 C36 H36A 108.8 . . ? 
N4 C36 H36B 108.8 . . ? 
N23 C36 H36B 108.8 . . ? 
H36A C36 H36B 107.7 . . ? 
 
loop_ 
 _geom_hbond_atom_site_label_D 
 _geom_hbond_atom_site_label_H 
 _geom_hbond_atom_site_label_A 
 _geom_hbond_distance_DH 
 _geom_hbond_distance_HA 
 _geom_hbond_distance_DA 
 _geom_hbond_angle_DHA 
 _geom_hbond_site_symmetry_A 
O22 H22A O3  0.82 2.49 2.945(11) 116.4 . 
O22 H22B O35  0.96 1.77 2.722(12) 172.5 . 
O23 H23A O7  0.79 2.00 2.740(10) 155.9 . 
O23 H23B O11  0.88 1.92 2.713(10) 148.8 . 
O24 H24A O8  0.91 1.84 2.688(10) 155.2 . 
O25 H25A O7  0.79 2.11 2.746(10) 137.7 1_455 
O26 H26A O9  0.85 1.87 2.619(11) 146.3 1_455 
O39 H39A O40  0.80 2.00 2.79(2) 169.7 1_455 

#===END

data_7 
 
_audit_creation_method            SHELXL-97 
_chemical_name_systematic         ?
_chemical_name_common             ? 
_chemical_melting_point           ? 
_chemical_formula_moiety          ? 
_chemical_formula_sum             'C36 H50 N27 O40 Pr2 Re3' 
_chemical_formula_weight          2341.45 
 
loop_ 
 _atom_type_symbol 
 _atom_type_description 
 _atom_type_scat_dispersion_real 
 _atom_type_scat_dispersion_imag 
 _atom_type_scat_source 
 'C'  'C'   0.0033   0.0016 
 'International Tables Vol C Tables 4.2.6.8 and 6.1.1.4' 
 'H'  'H'   0.0000   0.0000 
 'International Tables Vol C Tables 4.2.6.8 and 6.1.1.4' 
 'N'  'N'   0.0061   0.0033 
 'International Tables Vol C Tables 4.2.6.8 and 6.1.1.4' 
 'O'  'O'   0.0106   0.0060 
 'International Tables Vol C Tables 4.2.6.8 and 6.1.1.4' 
 'Pr'  'Pr'  -0.2180   2.8214 
 'International Tables Vol C Tables 4.2.6.8 and 6.1.1.4' 
 'Re'  'Re'  -1.0185   7.2310 
 'International Tables Vol C Tables 4.2.6.8 and 6.1.1.4' 
 
_symmetry_cell_setting            orthorhombic
_symmetry_space_group_name_H-M    'P n a 21'
 
loop_ 
 _symmetry_equiv_pos_as_xyz 
 'x, y, z' 
 '-x, -y, z+1/2' 
 'x+1/2, -y+1/2, z' 
 '-x+1/2, y+1/2, z+1/2' 
 
_cell_length_a                    12.0575(3) 
_cell_length_b                    21.5172(8) 
_cell_length_c                    23.7178(9) 
_cell_angle_alpha                 90.00 
_cell_angle_beta                  90.00 
_cell_angle_gamma                 90.00 
_cell_volume                      6153.4(4) 
_cell_formula_units_Z             4 
_cell_measurement_temperature     100(2) 
_cell_measurement_reflns_used     154703
_cell_measurement_theta_min       3.22
_cell_measurement_theta_max       25.68
 
_exptl_crystal_description        parallelepiped
_exptl_crystal_colour             colourless
_exptl_crystal_size_max           0.14
_exptl_crystal_size_mid           0.10
_exptl_crystal_size_min           0.08
_exptl_crystal_density_meas       ? 
_exptl_crystal_density_diffrn     2.527 
_exptl_crystal_density_method     'not measured' 
_exptl_crystal_F_000              4472 
_exptl_absorpt_coefficient_mu     7.565 
_exptl_absorpt_correction_type    'multi-scan'
_exptl_absorpt_correction_T_min   0.364
_exptl_absorpt_correction_T_max   0.546
_exptl_absorpt_process_details    
'SCALEPACK (Otwinowski & Minor, 1997)'  
_exptl_special_details
'crystal-to-detector distance 40 mm'
_diffrn_ambient_temperature       100(2)
_diffrn_radiation_wavelength      0.71073 
_diffrn_radiation_type            MoK\a 
_diffrn_radiation_source          'fine-focus sealed tube' 
_diffrn_radiation_monochromator   graphite 
_diffrn_measurement_device_type   
'Nonius Kappa-CCD area-detector diffractometer'  
_diffrn_measurement_method        
'two \f and five \w scans with 2\% steps (500 frames)' 
_diffrn_standards_interval_time   0
_diffrn_standards_number          0
_diffrn_standards_decay_%         0
_diffrn_reflns_number             154703
_diffrn_reflns_av_R_equivalents   0.0518 
_diffrn_reflns_av_sigmaI/netI     0.0323 
_diffrn_reflns_limit_h_min        -14 
_diffrn_reflns_limit_h_max        14 
_diffrn_reflns_limit_k_min        -26 
_diffrn_reflns_limit_k_max        26 
_diffrn_reflns_limit_l_min        -28 
_diffrn_reflns_limit_l_max        28 
_diffrn_reflns_theta_min          3.22 
_diffrn_reflns_theta_max          25.68 
_reflns_number_total              11204 
_reflns_number_gt                 10522 
_reflns_threshold_expression      >2sigma(I) 
 
_computing_data_collection        'COLLECT (Nonius, 1998)'
_computing_cell_refinement        'HKL2000 (Otwinowski & Minor, 1997)'
_computing_data_reduction         'HKL2000 (Otwinowski & Minor, 1997)'
_computing_structure_solution     'SHELXS-97 (Sheldrick, 1997)' 
_computing_structure_refinement   'SHELXL-97 (Sheldrick, 1997)' 
_computing_molecular_graphics     'SHELXTL (Sheldrick, 1999)' 
_computing_publication_material   
'SHELXTL (Sheldrick, 1999); PLATON (Spek, 2003)' 
 
_refine_special_details 
;
 The structure of the isomorphous Ce complex was used as a starting model.
 All non-hydrogen atoms were refined with anisotropic displacement parameters,
 with restraints for four badly behaving atoms in the counter-ions and water 
 solvent molecules. The H atoms bound to O atoms were found on a
 Fourier-difference map, except those of O40, and all the others were 
 introduced at calculated positions. All were treated as riding atoms with 
 an isotropic displacement parameter equal to 1.2 times that of the parent 
 atom.
 Refinement of F^2^ against ALL reflections.  The weighted R-factor wR and 
 goodness of fit S are based on F^2^, conventional R-factors R are based 
 on F, with F set to zero for negative F^2^. The threshold expression of 
 F^2^ > 2sigma(F^2^) is used only for calculating R-factors(gt) etc. and is 
 not relevant to the choice of reflections for refinement.  R-factors based 
 on F^2^ are statistically about twice as large as those based on F, and R- 
 factors based on ALL data will be even larger. 
;
_refine_ls_structure_factor_coef  Fsqd  
_refine_ls_matrix_type            full 
_refine_ls_weighting_scheme       calc  
_refine_ls_weighting_details 
 'calc w=1/[\s^2^(Fo^2^)+(0.0587P)^2^+29.5434P] where P=(Fo^2^+2Fc^2^)/3' 
_atom_sites_solution_primary      direct 
_atom_sites_solution_secondary    difmap 
_atom_sites_solution_hydrogens    geom 
_refine_ls_hydrogen_treatment     constr 
_refine_ls_extinction_method      none 
_refine_ls_extinction_coef        ? 
_refine_ls_abs_structure_details 
 'Flack H D (1983), Acta Cryst. A39, 876-881' 
_refine_ls_abs_structure_Flack    0.518(6) 
_refine_ls_number_reflns          11204 
_refine_ls_number_parameters      974 
_refine_ls_number_restraints      25 
_refine_ls_R_factor_all           0.0381 
_refine_ls_R_factor_gt            0.0344 
_refine_ls_wR_factor_ref          0.0904 
_refine_ls_wR_factor_gt           0.0884 
_refine_ls_goodness_of_fit_ref    1.004 
_refine_ls_restrained_S_all       1.010 
_refine_ls_shift/su_max           0.000 
_refine_ls_shift/su_mean          0.000 
_diffrn_measured_fraction_theta_max    0.997 
_diffrn_reflns_theta_full              25.68 
_diffrn_measured_fraction_theta_full   0.997 
_refine_diff_density_max    2.623 
_refine_diff_density_min   -4.919 
_refine_diff_density_rms    0.176 
 
loop_ 
 _atom_site_label 
 _atom_site_type_symbol 
 _atom_site_fract_x 
 _atom_site_fract_y 
 _atom_site_fract_z 
 _atom_site_U_iso_or_equiv 
 _atom_site_adp_type 
 _atom_site_occupancy 
 _atom_site_symmetry_multiplicity 
 _atom_site_calc_flag 
 _atom_site_refinement_flags 
 _atom_site_disorder_assembly 
 _atom_site_disorder_group 
Pr1 Pr 0.50858(4) 0.07853(2) 0.83478(2) 0.01961(11) Uani 1 1 d . . . 
Pr2 Pr -0.04449(4) -0.04248(2) 0.68386(2) 0.01906(11) Uani 1 1 d . . . 
Re1 Re 0.26350(3) -0.020548(16) 0.751583(17) 0.01970(9) Uani 1 1 d . . . 
Re2 Re 0.44289(6) 0.23760(3) 0.52201(2) 0.05956(18) Uani 1 1 d . . . 
Re3 Re 0.35171(3) 0.298920(16) 0.979810(17) 0.02126(9) Uani 1 1 d . . . 
O1 O 0.3670(5) 0.1642(3) 0.8101(3) 0.0247(15) Uani 1 1 d . . . 
O2 O -0.0700(6) 0.0597(3) 0.7358(3) 0.0252(15) Uani 1 1 d . . . 
O3 O 0.3845(5) 0.0857(3) 0.9184(3) 0.0232(15) Uani 1 1 d . . . 
O4 O -0.0171(5) -0.0504(3) 0.8494(3) 0.0243(15) Uani 1 1 d . . . 
O5 O 0.4611(6) -0.0324(3) 0.8675(3) 0.0256(15) Uani 1 1 d . . . 
O6 O 0.0830(5) -0.1980(3) 0.8548(3) 0.0240(15) Uani 1 1 d . . . 
O7 O 0.6022(5) -0.0912(3) 0.7335(3) 0.0186(14) Uani 1 1 d . . . 
O8 O 0.1592(5) -0.2215(3) 0.7286(3) 0.0231(15) Uani 1 1 d . . . 
O9 O 0.5851(6) -0.0143(3) 0.6131(3) 0.0285(16) Uani 1 1 d . . . 
O10 O 0.1160(5) -0.0977(3) 0.6312(3) 0.0223(14) Uani 1 1 d . . . 
O11 O 0.4466(5) 0.1027(3) 0.6638(3) 0.0260(15) Uani 1 1 d . . . 
O12 O -0.0157(5) 0.0398(3) 0.6154(3) 0.0220(15) Uani 1 1 d . . . 
O13 O 0.5981(6) 0.1591(3) 0.7661(3) 0.0300(17) Uani 1 1 d . . . 
O14 O 0.7128(6) 0.1158(3) 0.8246(3) 0.0317(17) Uani 1 1 d . . . 
O15 O 0.7722(6) 0.1853(4) 0.7656(4) 0.041(2) Uani 1 1 d . . . 
O16 O 0.6279(6) 0.0429(3) 0.9152(3) 0.0288(16) Uani 1 1 d . . . 
O17 O 0.6747(5) -0.0073(3) 0.8400(3) 0.0249(14) Uani 1 1 d . . . 
O18 O 0.7425(7) -0.0349(4) 0.9203(4) 0.046(2) Uani 1 1 d . . . 
O19 O -0.1018(7) -0.0731(3) 0.5830(3) 0.0351(18) Uani 1 1 d . . . 
O20 O -0.1403(6) -0.1411(3) 0.6473(3) 0.0283(16) Uani 1 1 d . . . 
O21 O -0.1737(6) -0.1624(4) 0.5599(4) 0.0393(19) Uani 1 1 d . . . 
O22 O 0.5547(6) 0.1752(4) 0.8901(3) 0.0315(17) Uani 1 1 d . . . 
H22A H 0.5180 0.2137 0.9042 0.038 Uiso 1 1 d R . . 
H22B H 0.5884 0.1683 0.9222 0.038 Uiso 1 1 d R . . 
O23 O 0.5511(5) 0.0328(3) 0.7433(3) 0.0256(15) Uani 1 1 d . . . 
H23A H 0.5595 -0.0041 0.7492 0.031 Uiso 1 1 d R . . 
H23B H 0.5283 0.0364 0.7118 0.031 Uiso 1 1 d R . . 
O24 O 0.0301(5) -0.1221(3) 0.7480(3) 0.0238(13) Uani 1 1 d . . . 
H24A H 0.0435 -0.1073 0.7798 0.029 Uiso 1 1 d R . . 
H24B H 0.0538 -0.1557 0.7420 0.029 Uiso 1 1 d R . . 
O25 O -0.1766(5) -0.0707(3) 0.7607(3) 0.0299(16) Uani 1 1 d . . . 
H25A H -0.2472 -0.0634 0.7476 0.036 Uiso 1 1 d R . . 
H25B H -0.1833 -0.0422 0.7875 0.036 Uiso 1 1 d R . . 
O26 O -0.2245(6) 0.0058(4) 0.6639(4) 0.042(2) Uani 1 1 d . . . 
H26A H -0.2695 -0.0076 0.6428 0.051 Uiso 1 1 d R . . 
H26B H -0.2569 0.0352 0.6821 0.051 Uiso 1 1 d R . . 
O27 O 0.3227(5) 0.0394(3) 0.7906(3) 0.0210(14) Uani 1 1 d . . . 
O28 O 0.1400(5) 0.0020(3) 0.7199(3) 0.0224(14) Uani 1 1 d . . . 
O29 O 0.2387(6) -0.0823(4) 0.7951(4) 0.0375(19) Uani 1 1 d . . . 
O30 O 0.3557(6) -0.0438(4) 0.7011(4) 0.0380(19) Uani 1 1 d . . . 
O31 O 0.4637(13) 0.2139(6) 0.5885(6) 0.092(3) Uani 1 1 d U . . 
O32 O 0.3029(12) 0.2588(6) 0.5087(7) 0.094(3) Uani 1 1 d U . . 
O33 O 0.4459(10) 0.1730(5) 0.4806(5) 0.078(2) Uani 1 1 d . . . 
O34 O 0.5416(10) 0.2890(4) 0.4979(5) 0.067(2) Uani 1 1 d . . . 
O35 O 0.4186(6) 0.2717(3) 0.9201(3) 0.0331(17) Uani 1 1 d . . . 
O36 O 0.4023(6) 0.2626(4) 1.0383(3) 0.0383(19) Uani 1 1 d . . . 
O37 O 0.2091(5) 0.2876(3) 0.9745(3) 0.0280(15) Uani 1 1 d . . . 
O38 O 0.3760(5) 0.3770(3) 0.9848(3) 0.0304(16) Uani 1 1 d . . . 
O39 O -0.2262(11) 0.1086(6) 0.5793(6) 0.089(4) Uani 1 1 d U . . 
H39A H -0.2724 0.1239 0.6107 0.106 Uiso 1 1 d R . . 
H39B H -0.1851 0.1489 0.5751 0.106 Uiso 1 1 d R . . 
O40 O 0.6410(13) 0.1886(7) 0.6472(7) 0.102(4) Uani 1 1 d U . . 
N1 N 0.2208(6) 0.1761(3) 0.7481(4) 0.0213(16) Uani 1 1 d . . . 
N2 N 0.1837(7) 0.1727(4) 0.8382(4) 0.0246(17) Uani 1 1 d . . . 
N3 N 0.0192(6) 0.1142(4) 0.8069(4) 0.0225(17) Uani 1 1 d . . . 
N4 N 0.0316(7) 0.1499(4) 0.7192(4) 0.0243(18) Uani 1 1 d . . . 
N5 N 0.1953(7) 0.1016(4) 0.9181(4) 0.0280(19) Uani 1 1 d . . . 
N6 N 0.2610(6) 0.0154(4) 0.9560(4) 0.0237(18) Uani 1 1 d . . . 
N7 N 0.0953(7) -0.0420(4) 0.9286(4) 0.0244(18) Uani 1 1 d . . . 
N8 N 0.0317(7) 0.0444(4) 0.8874(4) 0.0229(18) Uani 1 1 d . . . 
N9 N 0.3527(6) -0.0809(4) 0.9343(4) 0.0224(17) Uani 1 1 d . . . 
N10 N 0.4246(6) -0.1386(3) 0.8655(3) 0.0187(16) Uani 1 1 d . . . 
N11 N 0.2736(6) -0.2126(4) 0.8682(3) 0.0208(17) Uani 1 1 d . . . 
N12 N 0.1854(6) -0.1424(4) 0.9201(3) 0.0219(17) Uani 1 1 d . . . 
N13 N 0.4961(6) -0.1690(3) 0.7746(3) 0.0190(16) Uani 1 1 d . . . 
N14 N 0.5159(6) -0.1677(3) 0.6811(3) 0.0200(16) Uani 1 1 d . . . 
N15 N 0.3254(6) -0.2056(3) 0.6816(4) 0.0200(16) Uani 1 1 d . . . 
N16 N 0.3290(6) -0.2336(3) 0.7720(3) 0.0190(16) Uani 1 1 d . . . 
N17 N 0.4795(6) -0.1032(4) 0.5994(4) 0.0224(17) Uani 1 1 d . . . 
N18 N 0.4260(6) -0.0136(4) 0.5604(3) 0.0203(16) Uani 1 1 d . . . 
N19 N 0.2346(6) -0.0452(4) 0.5720(3) 0.0199(17) Uani 1 1 d . . . 
N20 N 0.2834(6) -0.1380(4) 0.6024(3) 0.0192(16) Uani 1 1 d . . . 
N21 N 0.3392(6) 0.0855(4) 0.5840(4) 0.0237(18) Uani 1 1 d . . . 
N22 N 0.2742(7) 0.1467(4) 0.6521(4) 0.0265(19) Uani 1 1 d . . . 
N23 N 0.0821(7) 0.1321(3) 0.6213(4) 0.0241(18) Uani 1 1 d . . . 
N24 N 0.1464(6) 0.0561(4) 0.5674(4) 0.0212(17) Uani 1 1 d . . . 
N25 N 0.6995(7) 0.1541(4) 0.7855(4) 0.032(2) Uani 1 1 d . . . 
N26 N 0.6857(6) -0.0008(4) 0.8919(4) 0.0243(18) Uani 1 1 d . . . 
N27 N -0.1399(7) -0.1274(4) 0.5956(4) 0.030(2) Uani 1 1 d . . . 
C1 C 0.2662(8) 0.1699(4) 0.7985(4) 0.020(2) Uani 1 1 d . . . 
C2 C 0.0759(8) 0.1746(5) 0.8132(4) 0.027(2) Uani 1 1 d . . . 
H2 H 0.0282 0.2058 0.8309 0.032 Uiso 1 1 calc R . . 
C3 C 0.1039(7) 0.1914(4) 0.7509(5) 0.023(2) Uani 1 1 d . . . 
H3 H 0.0897 0.2353 0.7424 0.027 Uiso 1 1 calc R . . 
C4 C -0.0104(7) 0.1038(4) 0.7529(5) 0.0230(19) Uani 1 1 d . . . 
C5 C 0.2004(8) 0.1645(4) 0.8985(4) 0.024(2) Uani 1 1 d . . . 
H5A H 0.2723 0.1815 0.9084 0.029 Uiso 1 1 calc R . . 
H5B H 0.1446 0.1885 0.9183 0.029 Uiso 1 1 calc R . . 
C6 C -0.0395(8) 0.0830(5) 0.8535(5) 0.025(2) Uani 1 1 d . . . 
H6A H -0.0734 0.1142 0.8774 0.030 Uiso 1 1 calc R . . 
H6B H -0.0985 0.0575 0.8380 0.030 Uiso 1 1 calc R . . 
C7 C 0.2871(8) 0.0688(4) 0.9291(4) 0.022(2) Uani 1 1 d . . . 
C8 C 0.1413(7) 0.0082(5) 0.9623(5) 0.024(2) Uani 1 1 d . . . 
H8 H 0.1195 0.0047 1.0020 0.029 Uiso 1 1 calc R . . 
C9 C 0.0956(8) 0.0683(4) 0.9348(4) 0.022(2) Uani 1 1 d . . . 
H9 H 0.0498 0.0924 0.9610 0.027 Uiso 1 1 calc R . . 
C10 C 0.0321(7) -0.0184(5) 0.8841(4) 0.020(2) Uani 1 1 d . . . 
C11 C 0.3431(7) -0.0301(5) 0.9734(5) 0.023(2) Uani 1 1 d . . . 
H11A H 0.4146 -0.0098 0.9769 0.028 Uiso 1 1 calc R . . 
H11B H 0.3230 -0.0462 1.0102 0.028 Uiso 1 1 calc R . . 
C12 C 0.0939(8) -0.1073(5) 0.9430(4) 0.024(2) Uani 1 1 d . . . 
H12A H 0.0948 -0.1112 0.9837 0.029 Uiso 1 1 calc R . . 
H12B H 0.0251 -0.1253 0.9295 0.029 Uiso 1 1 calc R . . 
C13 C 0.4157(8) -0.0799(4) 0.8877(4) 0.022(2) Uani 1 1 d . . . 
C14 C 0.3627(7) -0.1827(4) 0.8984(4) 0.0191(19) Uani 1 1 d . . . 
H14 H 0.4111 -0.2128 0.9173 0.023 Uiso 1 1 calc R . . 
C15 C 0.2986(8) -0.1413(4) 0.9412(4) 0.022(2) Uani 1 1 d . . . 
H15 H 0.3041 -0.1569 0.9799 0.027 Uiso 1 1 calc R . . 
C16 C 0.1697(8) -0.1850(5) 0.8784(4) 0.022(2) Uani 1 1 d . . . 
C17 C 0.5218(8) -0.1553(4) 0.8324(4) 0.0220(19) Uani 1 1 d . . . 
H17A H 0.5745 -0.1213 0.8336 0.026 Uiso 1 1 calc R . . 
H17B H 0.5568 -0.1913 0.8493 0.026 Uiso 1 1 calc R . . 
C18 C 0.2913(8) -0.2588(4) 0.8240(4) 0.023(2) Uani 1 1 d . . . 
H18A H 0.3452 -0.2889 0.8372 0.028 Uiso 1 1 calc R . . 
H18B H 0.2222 -0.2807 0.8174 0.028 Uiso 1 1 calc R . . 
C19 C 0.5427(7) -0.1378(5) 0.7308(4) 0.022(2) Uani 1 1 d . . . 
C20 C 0.4409(7) -0.2190(4) 0.6913(4) 0.0192(19) Uani 1 1 d . . . 
H20 H 0.4644 -0.2567 0.6714 0.023 Uiso 1 1 calc R . . 
C21 C 0.4457(7) -0.2277(4) 0.7561(4) 0.0162(17) Uani 1 1 d . . . 
H21 H 0.4897 -0.2640 0.7672 0.019 Uiso 1 1 calc R . . 
C22 C 0.2635(7) -0.2196(4) 0.7282(4) 0.020(2) Uani 1 1 d . . . 
C23 C 0.5520(8) -0.1462(4) 0.6264(4) 0.022(2) Uani 1 1 d . . . 
H23C H 0.6241 -0.1267 0.6306 0.027 Uiso 1 1 calc R . . 
H23D H 0.5612 -0.1819 0.6020 0.027 Uiso 1 1 calc R . . 
C24 C 0.2745(8) -0.1999(4) 0.6266(4) 0.021(2) Uani 1 1 d . . . 
H24C H 0.1967 -0.2108 0.6297 0.026 Uiso 1 1 calc R . . 
H24D H 0.3091 -0.2294 0.6012 0.026 Uiso 1 1 calc R . . 
C25 C 0.5051(7) -0.0412(5) 0.5941(4) 0.024(2) Uani 1 1 d . . . 
C26 C 0.3402(8) -0.0567(5) 0.5439(4) 0.023(2) Uani 1 1 d . . . 
H26 H 0.3316 -0.0584 0.5028 0.027 Uiso 1 1 calc R . . 
C27 C 0.3799(8) -0.1185(5) 0.5676(4) 0.025(2) Uani 1 1 d . . . 
H27 H 0.3955 -0.1485 0.5375 0.030 Uiso 1 1 calc R . . 
C28 C 0.2041(8) -0.0940(4) 0.6044(4) 0.021(2) Uani 1 1 d . . . 
C29 C 0.4222(9) 0.0518(5) 0.5513(4) 0.026(2) Uani 1 1 d . . . 
H29A H 0.4082 0.0593 0.5116 0.031 Uiso 1 1 calc R . . 
H29B H 0.4946 0.0690 0.5600 0.031 Uiso 1 1 calc R . . 
C30 C 0.1533(7) -0.0059(4) 0.5436(4) 0.021(2) Uani 1 1 d . . . 
H30A H 0.1727 -0.0028 0.5041 0.026 Uiso 1 1 calc R . . 
H30B H 0.0810 -0.0255 0.5461 0.026 Uiso 1 1 calc R . . 
C31 C 0.3618(7) 0.1100(4) 0.6370(4) 0.023(2) Uani 1 1 d . . . 
C32 C 0.1913(8) 0.1539(4) 0.6070(5) 0.025(2) Uani 1 1 d . . . 
H32 H 0.1903 0.1961 0.5915 0.031 Uiso 1 1 calc R . . 
C33 C 0.2323(8) 0.1045(5) 0.5629(5) 0.029(2) Uani 1 1 d . . . 
H33 H 0.2370 0.1218 0.5247 0.035 Uiso 1 1 calc R . . 
C34 C 0.0652(7) 0.0718(4) 0.6039(4) 0.0187(19) Uani 1 1 d . . . 
C35 C 0.2836(8) 0.1919(4) 0.6970(4) 0.025(2) Uani 1 1 d . . . 
H35A H 0.2580 0.2318 0.6831 0.030 Uiso 1 1 calc R . . 
H35B H 0.3613 0.1963 0.7069 0.030 Uiso 1 1 calc R . . 
C36 C 0.0043(8) 0.1605(5) 0.6611(4) 0.025(2) Uani 1 1 d . . . 
H36A H 0.0021 0.2049 0.6544 0.030 Uiso 1 1 calc R . . 
H36B H -0.0693 0.1442 0.6540 0.030 Uiso 1 1 calc R . . 
 
loop_ 
 _atom_site_aniso_label 
 _atom_site_aniso_U_11 
 _atom_site_aniso_U_22 
 _atom_site_aniso_U_33 
 _atom_site_aniso_U_23 
 _atom_site_aniso_U_13 
 _atom_site_aniso_U_12 
Pr1 0.0156(2) 0.0192(2) 0.0240(3) -0.0044(2) -0.0025(2) 0.00083(19) 
Pr2 0.0139(2) 0.0189(2) 0.0244(3) -0.0025(2) -0.0018(2) -0.00012(18) 
Re1 0.01536(17) 0.01845(16) 0.02530(19) -0.00321(16) -0.00409(16) 0.00103(13) 
Re2 0.1015(5) 0.0407(3) 0.0365(3) 0.0074(2) 0.0226(3) 0.0048(3) 
Re3 0.02088(18) 0.02082(17) 0.02208(19) -0.00021(16) 0.00295(16) -0.00015(14) 
O1 0.023(4) 0.022(3) 0.029(4) -0.001(3) -0.007(3) -0.002(3) 
O2 0.028(4) 0.023(3) 0.025(4) -0.005(3) 0.001(3) 0.001(3) 
O3 0.018(3) 0.024(3) 0.028(4) -0.010(3) -0.004(3) 0.004(3) 
O4 0.021(3) 0.024(3) 0.028(4) -0.009(3) 0.000(3) -0.004(3) 
O5 0.026(4) 0.024(3) 0.027(4) -0.006(3) 0.006(3) 0.007(3) 
O6 0.010(3) 0.021(3) 0.040(4) -0.001(3) -0.004(3) -0.002(2) 
O7 0.010(3) 0.022(3) 0.025(4) -0.001(3) 0.000(2) -0.008(2) 
O8 0.013(3) 0.025(3) 0.031(4) 0.001(3) 0.000(3) 0.002(3) 
O9 0.026(4) 0.025(4) 0.034(4) 0.002(3) -0.006(3) -0.001(3) 
O10 0.019(3) 0.023(3) 0.025(4) -0.003(3) 0.001(3) 0.003(3) 
O11 0.017(3) 0.034(4) 0.026(4) 0.002(3) -0.013(3) -0.004(3) 
O12 0.012(3) 0.021(3) 0.033(4) 0.000(3) -0.005(3) -0.003(3) 
O13 0.032(4) 0.019(3) 0.039(5) 0.000(3) -0.003(3) -0.002(3) 
O14 0.020(3) 0.027(4) 0.048(5) 0.009(3) -0.005(3) 0.009(3) 
O15 0.032(4) 0.032(4) 0.060(6) 0.011(4) 0.009(4) -0.006(3) 
O16 0.025(4) 0.039(4) 0.022(4) -0.013(3) -0.001(3) 0.007(3) 
O17 0.025(3) 0.036(4) 0.014(3) -0.008(3) -0.001(3) 0.000(3) 
O18 0.050(5) 0.045(5) 0.042(5) -0.001(4) -0.010(4) 0.025(4) 
O19 0.052(5) 0.023(4) 0.030(4) 0.009(3) -0.015(4) -0.013(3) 
O20 0.029(4) 0.033(4) 0.023(4) 0.005(3) 0.002(3) -0.007(3) 
O21 0.038(4) 0.044(5) 0.036(5) -0.002(4) -0.008(4) -0.013(4) 
O22 0.022(4) 0.038(4) 0.035(4) -0.011(3) -0.005(3) -0.002(3) 
O23 0.027(4) 0.022(3) 0.027(4) 0.003(3) -0.002(3) 0.001(3) 
O24 0.029(3) 0.022(3) 0.020(3) 0.000(3) 0.005(3) 0.003(3) 
O25 0.023(3) 0.033(4) 0.033(4) -0.015(3) 0.009(3) 0.001(3) 
O26 0.023(4) 0.027(4) 0.078(7) -0.007(4) -0.026(4) 0.004(3) 
O27 0.011(3) 0.023(3) 0.029(4) -0.007(3) 0.000(3) -0.001(2) 
O28 0.027(4) 0.018(3) 0.022(4) 0.002(3) -0.002(3) 0.002(3) 
O29 0.029(4) 0.037(4) 0.047(5) 0.015(4) -0.016(3) -0.011(3) 
O30 0.027(4) 0.043(4) 0.043(5) -0.026(4) 0.000(3) 0.010(3) 
O31 0.126(5) 0.075(5) 0.075(5) 0.014(4) -0.002(5) -0.014(5) 
O32 0.099(5) 0.087(5) 0.095(5) 0.016(5) 0.005(5) 0.006(5) 
O33 0.101(5) 0.066(4) 0.066(5) -0.001(4) 0.010(4) -0.019(4) 
O34 0.099(6) 0.041(4) 0.060(5) 0.004(4) -0.009(4) -0.013(4) 
O35 0.037(4) 0.032(4) 0.030(4) -0.004(3) 0.002(3) -0.004(3) 
O36 0.034(4) 0.046(5) 0.035(5) 0.010(4) 0.005(3) 0.005(3) 
O37 0.024(3) 0.030(4) 0.030(4) -0.006(3) 0.008(3) -0.002(3) 
O38 0.016(3) 0.032(4) 0.042(4) -0.011(4) 0.018(3) -0.006(3) 
O39 0.097(7) 0.078(6) 0.090(7) 0.018(6) -0.046(6) -0.014(6) 
O40 0.113(8) 0.081(7) 0.111(8) -0.021(7) -0.011(7) -0.021(6) 
N1 0.013(4) 0.020(4) 0.031(5) -0.006(4) 0.000(3) 0.004(3) 
N2 0.027(4) 0.020(4) 0.027(5) -0.003(4) -0.003(4) 0.002(3) 
N3 0.014(4) 0.027(4) 0.026(5) -0.003(4) 0.000(3) 0.001(3) 
N4 0.022(4) 0.017(4) 0.033(5) -0.005(3) -0.011(4) 0.000(3) 
N5 0.031(5) 0.030(5) 0.023(5) -0.006(4) 0.002(4) 0.011(4) 
N6 0.017(4) 0.022(4) 0.032(5) -0.009(4) 0.000(3) 0.002(3) 
N7 0.032(5) 0.021(4) 0.020(5) -0.007(3) -0.001(4) 0.000(3) 
N8 0.022(4) 0.023(4) 0.024(5) -0.002(3) -0.002(3) 0.000(3) 
N9 0.025(4) 0.023(4) 0.019(4) -0.004(3) 0.007(3) -0.004(3) 
N10 0.015(3) 0.018(4) 0.024(4) 0.004(3) 0.002(3) 0.000(3) 
N11 0.021(4) 0.022(4) 0.020(4) -0.004(3) -0.002(3) -0.005(3) 
N12 0.016(4) 0.025(4) 0.024(5) 0.001(4) 0.001(3) 0.002(3) 
N13 0.017(4) 0.017(4) 0.023(4) -0.004(3) 0.005(3) -0.002(3) 
N14 0.017(4) 0.023(4) 0.020(4) -0.002(3) 0.000(3) -0.003(3) 
N15 0.016(4) 0.024(4) 0.020(4) 0.003(3) 0.002(3) 0.000(3) 
N16 0.006(3) 0.025(4) 0.026(4) 0.000(3) 0.000(3) -0.004(3) 
N17 0.013(4) 0.030(4) 0.024(4) 0.001(4) 0.005(3) 0.003(3) 
N18 0.029(4) 0.020(4) 0.012(4) -0.001(3) 0.000(3) -0.001(3) 
N19 0.024(4) 0.022(4) 0.013(4) 0.000(3) -0.002(3) -0.005(3) 
N20 0.013(4) 0.023(4) 0.022(4) -0.005(3) 0.001(3) -0.001(3) 
N21 0.018(4) 0.028(4) 0.025(5) -0.005(4) 0.001(3) 0.001(3) 
N22 0.030(5) 0.023(4) 0.026(5) -0.006(4) -0.009(4) 0.000(4) 
N23 0.027(4) 0.011(4) 0.034(5) 0.004(3) -0.004(4) 0.002(3) 
N24 0.017(4) 0.019(4) 0.028(5) 0.002(3) -0.004(3) -0.006(3) 
N25 0.019(4) 0.019(4) 0.057(6) -0.005(4) -0.002(4) 0.004(3) 
N26 0.014(4) 0.030(4) 0.029(5) 0.001(4) -0.004(3) 0.008(3) 
N27 0.035(5) 0.023(4) 0.031(5) -0.011(4) -0.003(4) -0.004(4) 
C1 0.025(5) 0.015(4) 0.020(5) -0.010(4) -0.002(4) 0.002(4) 
C2 0.019(5) 0.032(5) 0.030(6) -0.009(4) -0.002(4) 0.005(4) 
C3 0.015(4) 0.016(4) 0.037(6) 0.001(4) -0.009(4) -0.001(3) 
C4 0.021(4) 0.018(4) 0.030(5) -0.002(4) -0.010(4) 0.002(3) 
C5 0.025(5) 0.019(5) 0.029(6) -0.013(4) -0.002(4) 0.004(4) 
C6 0.021(5) 0.027(5) 0.028(6) -0.002(4) 0.001(4) 0.005(4) 
C7 0.022(5) 0.023(4) 0.020(5) -0.015(4) 0.002(4) 0.001(4) 
C8 0.011(4) 0.034(5) 0.028(6) -0.008(4) -0.007(4) 0.003(4) 
C9 0.016(5) 0.025(5) 0.026(5) -0.004(4) 0.005(4) 0.005(4) 
C10 0.013(4) 0.034(5) 0.014(5) 0.002(4) 0.004(4) 0.007(4) 
C11 0.010(4) 0.035(5) 0.026(6) -0.009(5) -0.004(4) -0.004(4) 
C12 0.020(5) 0.032(5) 0.021(5) 0.002(4) 0.007(4) 0.007(4) 
C13 0.022(5) 0.023(5) 0.022(5) -0.005(4) -0.004(4) 0.001(4) 
C14 0.008(4) 0.026(5) 0.023(5) -0.002(4) -0.005(4) 0.003(3) 
C15 0.020(5) 0.025(5) 0.022(5) -0.002(4) -0.001(4) -0.004(4) 
C16 0.016(5) 0.027(5) 0.024(5) 0.010(4) 0.012(4) 0.005(4) 
C17 0.022(5) 0.024(5) 0.021(5) -0.003(4) -0.006(4) 0.004(4) 
C18 0.028(5) 0.021(5) 0.022(5) -0.001(4) -0.001(4) 0.001(4) 
C19 0.013(4) 0.026(5) 0.025(5) 0.001(4) 0.005(4) 0.007(4) 
C20 0.016(4) 0.014(4) 0.028(5) -0.007(4) 0.000(4) 0.002(3) 
C21 0.020(4) 0.014(4) 0.015(5) -0.001(4) 0.004(4) 0.004(3) 
C22 0.011(4) 0.021(4) 0.028(5) -0.001(4) 0.010(4) -0.006(3) 
C23 0.026(5) 0.014(4) 0.026(5) -0.005(4) 0.005(4) 0.004(4) 
C24 0.019(4) 0.018(4) 0.027(5) -0.005(4) -0.010(4) 0.009(4) 
C25 0.011(4) 0.037(5) 0.022(5) -0.001(4) 0.005(4) 0.003(4) 
C26 0.023(5) 0.029(5) 0.017(5) 0.003(4) 0.002(4) 0.003(4) 
C27 0.027(5) 0.024(5) 0.023(5) -0.006(4) 0.002(4) -0.006(4) 
C28 0.028(5) 0.022(5) 0.013(5) -0.008(4) -0.002(4) -0.005(4) 
C29 0.035(5) 0.026(5) 0.017(5) -0.001(4) -0.004(4) -0.009(4) 
C30 0.015(4) 0.023(5) 0.026(6) 0.001(4) -0.002(4) -0.002(4) 
C31 0.020(5) 0.024(5) 0.023(5) 0.005(4) 0.005(4) 0.000(4) 
C32 0.025(5) 0.018(4) 0.034(6) -0.001(4) -0.010(4) 0.008(4) 
C33 0.029(5) 0.029(5) 0.029(6) 0.008(5) -0.001(4) 0.006(4) 
C34 0.018(5) 0.022(5) 0.017(5) 0.001(4) -0.011(4) 0.007(4) 
C35 0.028(5) 0.020(5) 0.028(6) -0.001(4) -0.005(4) -0.006(4) 
C36 0.024(5) 0.024(5) 0.026(5) -0.003(4) -0.007(4) -0.004(4) 
 
_geom_special_details 
; 
 All esds (except the esd in the dihedral angle between two l.s. planes) 
 are estimated using the full covariance matrix.  The cell esds are taken 
 into account individually in the estimation of esds in distances, angles 
 and torsion angles; correlations between esds in cell parameters are only 
 used when they are defined by crystal symmetry.  An approximate (isotropic) 
 treatment of cell esds is used for estimating esds involving l.s. planes. 
;
loop_ 
 _geom_bond_atom_site_label_1 
 _geom_bond_atom_site_label_2 
 _geom_bond_distance 
 _geom_bond_site_symmetry_2 
 _geom_bond_publ_flag 
Pr1 O23 2.437(7) . ? 
Pr1 O3 2.490(7) . ? 
Pr1 O16 2.509(7) . ? 
Pr1 O22 2.522(7) . ? 
Pr1 O5 2.575(7) . ? 
Pr1 O1 2.579(7) . ? 
Pr1 O14 2.601(7) . ? 
Pr1 O27 2.613(6) . ? 
Pr1 O13 2.613(7) . ? 
Pr1 O17 2.728(7) . ? 
Pr2 O12 2.426(7) . ? 
Pr2 O26 2.452(7) . ? 
Pr2 O24 2.461(7) . ? 
Pr2 O25 2.496(7) . ? 
Pr2 O2 2.538(7) . ? 
Pr2 O28 2.568(7) . ? 
Pr2 O20 2.567(7) . ? 
Pr2 O19 2.576(7) . ? 
Pr2 O10 2.592(6) . ? 
Re1 O29 1.709(8) . ? 
Re1 O30 1.709(7) . ? 
Re1 O28 1.738(6) . ? 
Re1 O27 1.741(6) . ? 
Re2 O31 1.678(14) . ? 
Re2 O33 1.702(12) . ? 
Re2 O34 1.723(10) . ? 
Re2 O32 1.777(14) . ? 
Re3 O36 1.705(8) . ? 
Re3 O38 1.709(7) . ? 
Re3 O35 1.732(8) . ? 
Re3 O37 1.741(6) . ? 
O1 C1 1.252(11) . ? 
O2 C4 1.258(11) . ? 
O3 C7 1.255(12) . ? 
O4 C10 1.227(12) . ? 
O5 C13 1.254(12) . ? 
O6 C16 1.218(12) . ? 
O7 C19 1.235(12) . ? 
O8 C22 1.258(11) . ? 
O9 C25 1.213(12) . ? 
O10 C28 1.241(12) . ? 
O11 C31 1.215(12) . ? 
O12 C34 1.225(12) . ? 
O13 N25 1.311(11) . ? 
O14 N25 1.253(12) . ? 
O15 N25 1.200(12) . ? 
O16 N26 1.293(11) . ? 
O17 N26 1.245(11) . ? 
O18 N26 1.209(12) . ? 
O19 N27 1.291(11) . ? 
O20 N27 1.260(12) . ? 
O21 N27 1.205(11) . ? 
O22 H22A 0.9968 . ? 
O22 H22B 0.8751 . ? 
O23 H23A 0.8120 . ? 
O23 H23B 0.7992 . ? 
O24 H24A 0.8338 . ? 
O24 H24B 0.7898 . ? 
O25 H25A 0.9192 . ? 
O25 H25B 0.8875 . ? 
O26 H26A 0.7906 . ? 
O26 H26B 0.8608 . ? 
O39 H39A 0.9875 . ? 
O39 H39B 1.0033 . ? 
N1 C1 1.323(13) . ? 
N1 C3 1.449(11) . ? 
N1 C35 1.468(13) . ? 
N2 C1 1.371(13) . ? 
N2 C2 1.429(13) . ? 
N2 C5 1.454(14) . ? 
N3 C4 1.348(13) . ? 
N3 C6 1.476(13) . ? 
N3 C2 1.475(13) . ? 
N4 C4 1.371(13) . ? 
N4 C36 1.433(13) . ? 
N4 C3 1.457(12) . ? 
N5 C7 1.338(13) . ? 
N5 C5 1.433(13) . ? 
N5 C9 1.455(13) . ? 
N6 C7 1.351(13) . ? 
N6 C11 1.451(13) . ? 
N6 C8 1.460(12) . ? 
N7 C10 1.397(13) . ? 
N7 C12 1.445(13) . ? 
N7 C8 1.455(12) . ? 
N8 C10 1.354(13) . ? 
N8 C6 1.439(13) . ? 
N8 C9 1.457(13) . ? 
N9 C13 1.341(13) . ? 
N9 C11 1.438(13) . ? 
N9 C15 1.464(12) . ? 
N10 C13 1.373(12) . ? 
N10 C14 1.437(12) . ? 
N10 C17 1.455(12) . ? 
N11 C16 1.408(12) . ? 
N11 C14 1.443(12) . ? 
N11 C18 1.461(13) . ? 
N12 C16 1.362(13) . ? 
N12 C12 1.443(12) . ? 
N12 C15 1.454(12) . ? 
N13 C19 1.357(12) . ? 
N13 C17 1.437(13) . ? 
N13 C21 1.468(11) . ? 
N14 C19 1.382(13) . ? 
N14 C23 1.444(13) . ? 
N14 C20 1.447(11) . ? 
N15 C22 1.367(12) . ? 
N15 C20 1.441(11) . ? 
N15 C24 1.447(13) . ? 
N16 C22 1.340(13) . ? 
N16 C18 1.421(13) . ? 
N16 C21 1.462(11) . ? 
N17 C25 1.376(13) . ? 
N17 C23 1.423(12) . ? 
N17 C27 1.456(12) . ? 
N18 C25 1.379(13) . ? 
N18 C29 1.426(13) . ? 
N18 C26 1.443(13) . ? 
N19 C28 1.351(13) . ? 
N19 C30 1.460(12) . ? 
N19 C26 1.459(12) . ? 
N20 C28 1.348(12) . ? 
N20 C24 1.454(12) . ? 
N20 C27 1.488(12) . ? 
N21 C31 1.390(13) . ? 
N21 C33 1.443(13) . ? 
N21 C29 1.458(13) . ? 
N22 C31 1.367(13) . ? 
N22 C35 1.447(13) . ? 
N22 C32 1.472(13) . ? 
N23 C34 1.376(12) . ? 
N23 C32 1.438(13) . ? 
N23 C36 1.466(13) . ? 
N24 C34 1.350(13) . ? 
N24 C30 1.450(12) . ? 
N24 C33 1.473(13) . ? 
C2 C3 1.559(16) . ? 
C2 H2 0.9800 . ? 
C3 H3 0.9800 . ? 
C5 H5A 0.9700 . ? 
C5 H5B 0.9700 . ? 
C6 H6A 0.9700 . ? 
C6 H6B 0.9700 . ? 
C8 C9 1.550(14) . ? 
C8 H8 0.9800 . ? 
C9 H9 0.9800 . ? 
C11 H11A 0.9700 . ? 
C11 H11B 0.9700 . ? 
C12 H12A 0.9700 . ? 
C12 H12B 0.9700 . ? 
C14 C15 1.556(13) . ? 
C14 H14 0.9800 . ? 
C15 H15 0.9800 . ? 
C17 H17A 0.9700 . ? 
C17 H17B 0.9700 . ? 
C18 H18A 0.9700 . ? 
C18 H18B 0.9700 . ? 
C20 C21 1.550(14) . ? 
C20 H20 0.9800 . ? 
C21 H21 0.9800 . ? 
C23 H23C 0.9700 . ? 
C23 H23D 0.9700 . ? 
C24 H24C 0.9700 . ? 
C24 H24D 0.9700 . ? 
C26 C27 1.520(14) . ? 
C26 H26 0.9800 . ? 
C27 H27 0.9800 . ? 
C29 H29A 0.9700 . ? 
C29 H29B 0.9700 . ? 
C30 H30A 0.9700 . ? 
C30 H30B 0.9700 . ? 
C32 C33 1.572(15) . ? 
C32 H32 0.9800 . ? 
C33 H33 0.9800 . ? 
C35 H35A 0.9700 . ? 
C35 H35B 0.9700 . ? 
C36 H36A 0.9700 . ? 
C36 H36B 0.9700 . ? 
 
loop_ 
 _geom_angle_atom_site_label_1 
 _geom_angle_atom_site_label_2 
 _geom_angle_atom_site_label_3 
 _geom_angle 
 _geom_angle_site_symmetry_1 
 _geom_angle_site_symmetry_3 
 _geom_angle_publ_flag 
O23 Pr1 O3 149.4(2) . . ? 
O23 Pr1 O16 115.6(2) . . ? 
O3 Pr1 O16 76.0(2) . . ? 
O23 Pr1 O22 138.6(2) . . ? 
O3 Pr1 O22 70.5(2) . . ? 
O16 Pr1 O22 74.3(2) . . ? 
O23 Pr1 O5 86.6(2) . . ? 
O3 Pr1 O5 71.6(2) . . ? 
O16 Pr1 O5 67.3(2) . . ? 
O22 Pr1 O5 131.0(2) . . ? 
O23 Pr1 O1 103.0(2) . . ? 
O3 Pr1 O1 74.9(2) . . ? 
O16 Pr1 O1 140.4(2) . . ? 
O22 Pr1 O1 71.0(2) . . ? 
O5 Pr1 O1 125.7(2) . . ? 
O23 Pr1 O14 80.9(2) . . ? 
O3 Pr1 O14 128.6(2) . . ? 
O16 Pr1 O14 67.8(2) . . ? 
O22 Pr1 O14 65.5(2) . . ? 
O5 Pr1 O14 121.6(2) . . ? 
O1 Pr1 O14 112.7(2) . . ? 
O23 Pr1 O27 72.2(2) . . ? 
O3 Pr1 O27 79.9(2) . . ? 
O16 Pr1 O27 134.2(2) . . ? 
O22 Pr1 O27 131.6(2) . . ? 
O5 Pr1 O27 68.4(2) . . ? 
O1 Pr1 O27 64.6(2) . . ? 
O14 Pr1 O27 150.9(2) . . ? 
O23 Pr1 O13 68.0(2) . . ? 
O3 Pr1 O13 134.7(2) . . ? 
O16 Pr1 O13 116.1(2) . . ? 
O22 Pr1 O13 71.7(2) . . ? 
O5 Pr1 O13 153.6(2) . . ? 
O1 Pr1 O13 70.0(2) . . ? 
O14 Pr1 O13 49.2(2) . . ? 
O27 Pr1 O13 108.6(2) . . ? 
O23 Pr1 O17 67.2(2) . . ? 
O3 Pr1 O17 116.6(2) . . ? 
O16 Pr1 O17 48.5(2) . . ? 
O22 Pr1 O17 111.9(2) . . ? 
O5 Pr1 O17 61.4(2) . . ? 
O1 Pr1 O17 168.6(2) . . ? 
O14 Pr1 O17 61.1(2) . . ? 
O27 Pr1 O17 115.48(19) . . ? 
O13 Pr1 O17 100.1(2) . . ? 
O12 Pr2 O26 71.8(3) . . ? 
O12 Pr2 O24 150.3(2) . . ? 
O26 Pr2 O24 137.6(3) . . ? 
O12 Pr2 O25 139.2(2) . . ? 
O26 Pr2 O25 71.3(3) . . ? 
O24 Pr2 O25 67.2(2) . . ? 
O12 Pr2 O2 73.2(2) . . ? 
O26 Pr2 O2 67.7(2) . . ? 
O24 Pr2 O2 110.3(2) . . ? 
O25 Pr2 O2 77.2(2) . . ? 
O12 Pr2 O28 80.0(2) . . ? 
O26 Pr2 O28 132.3(2) . . ? 
O24 Pr2 O28 74.8(2) . . ? 
O25 Pr2 O28 113.6(2) . . ? 
O2 Pr2 O28 67.7(2) . . ? 
O12 Pr2 O20 116.2(2) . . ? 
O26 Pr2 O20 83.5(2) . . ? 
O24 Pr2 O20 78.3(2) . . ? 
O25 Pr2 O20 76.0(2) . . ? 
O2 Pr2 O20 145.6(2) . . ? 
O28 Pr2 O20 144.1(2) . . ? 
O12 Pr2 O19 66.7(2) . . ? 
O26 Pr2 O19 72.0(3) . . ? 
O24 Pr2 O19 119.6(2) . . ? 
O25 Pr2 O19 116.4(2) . . ? 
O2 Pr2 O19 129.8(2) . . ? 
O28 Pr2 O19 129.5(2) . . ? 
O20 Pr2 O19 49.8(2) . . ? 
O12 Pr2 O10 84.6(2) . . ? 
O26 Pr2 O10 139.6(3) . . ? 
O24 Pr2 O10 72.9(2) . . ? 
O25 Pr2 O10 135.8(2) . . ? 
O2 Pr2 O10 136.2(2) . . ? 
O28 Pr2 O10 71.6(2) . . ? 
O20 Pr2 O10 78.1(2) . . ? 
O19 Pr2 O10 68.6(2) . . ? 
O29 Re1 O30 108.0(4) . . ? 
O29 Re1 O28 109.2(3) . . ? 
O30 Re1 O28 109.6(4) . . ? 
O29 Re1 O27 109.0(4) . . ? 
O30 Re1 O27 108.8(3) . . ? 
O28 Re1 O27 112.0(3) . . ? 
O31 Re2 O33 106.9(7) . . ? 
O31 Re2 O34 113.9(6) . . ? 
O33 Re2 O34 108.5(5) . . ? 
O31 Re2 O32 112.8(7) . . ? 
O33 Re2 O32 97.3(7) . . ? 
O34 Re2 O32 115.6(6) . . ? 
O36 Re3 O38 109.5(4) . . ? 
O36 Re3 O35 110.1(4) . . ? 
O38 Re3 O35 108.0(3) . . ? 
O36 Re3 O37 110.4(4) . . ? 
O38 Re3 O37 108.2(3) . . ? 
O35 Re3 O37 110.7(3) . . ? 
C1 O1 Pr1 139.7(6) . . ? 
C4 O2 Pr2 137.8(6) . . ? 
C7 O3 Pr1 134.8(6) . . ? 
C13 O5 Pr1 165.4(6) . . ? 
C28 O10 Pr2 148.9(6) . . ? 
C34 O12 Pr2 132.4(6) . . ? 
N25 O13 Pr1 96.5(6) . . ? 
N25 O14 Pr1 98.7(5) . . ? 
N26 O16 Pr1 101.9(5) . . ? 
N26 O17 Pr1 92.7(5) . . ? 
N27 O19 Pr2 96.4(6) . . ? 
N27 O20 Pr2 97.7(5) . . ? 
Pr1 O22 H22A 139.6 . . ? 
Pr1 O22 H22B 114.6 . . ? 
H22A O22 H22B 93.2 . . ? 
Pr1 O23 H23A 105.5 . . ? 
Pr1 O23 H23B 136.1 . . ? 
H23A O23 H23B 107.4 . . ? 
Pr2 O24 H24A 111.3 . . ? 
Pr2 O24 H24B 131.1 . . ? 
H24A O24 H24B 116.2 . . ? 
Pr2 O25 H25A 107.6 . . ? 
Pr2 O25 H25B 114.5 . . ? 
H25A O25 H25B 92.3 . . ? 
Pr2 O26 H26A 125.2 . . ? 
Pr2 O26 H26B 128.0 . . ? 
H26A O26 H26B 105.8 . . ? 
Re1 O27 Pr1 143.5(3) . . ? 
Re1 O28 Pr2 141.4(3) . . ? 
H39A O39 H39B 93.7 . . ? 
C1 N1 C3 112.6(8) . . ? 
C1 N1 C35 123.7(8) . . ? 
C3 N1 C35 119.2(8) . . ? 
C1 N2 C2 112.1(9) . . ? 
C1 N2 C5 124.7(8) . . ? 
C2 N2 C5 122.5(8) . . ? 
C4 N3 C6 120.6(8) . . ? 
C4 N3 C2 111.4(8) . . ? 
C6 N3 C2 123.2(8) . . ? 
C4 N4 C36 126.1(8) . . ? 
C4 N4 C3 111.3(8) . . ? 
C36 N4 C3 122.4(8) . . ? 
C7 N5 C5 121.7(9) . . ? 
C7 N5 C9 111.8(8) . . ? 
C5 N5 C9 126.1(8) . . ? 
C7 N6 C11 123.3(8) . . ? 
C7 N6 C8 111.7(8) . . ? 
C11 N6 C8 124.9(8) . . ? 
C10 N7 C12 121.7(8) . . ? 
C10 N7 C8 110.7(8) . . ? 
C12 N7 C8 126.5(8) . . ? 
C10 N8 C6 123.1(8) . . ? 
C10 N8 C9 113.2(8) . . ? 
C6 N8 C9 123.0(8) . . ? 
C13 N9 C11 124.4(8) . . ? 
C13 N9 C15 111.0(8) . . ? 
C11 N9 C15 124.5(8) . . ? 
C13 N10 C14 111.0(8) . . ? 
C13 N10 C17 119.8(8) . . ? 
C14 N10 C17 123.3(7) . . ? 
C16 N11 C14 112.9(8) . . ? 
C16 N11 C18 122.7(8) . . ? 
C14 N11 C18 123.5(8) . . ? 
C16 N12 C12 121.3(8) . . ? 
C16 N12 C15 113.1(8) . . ? 
C12 N12 C15 125.4(8) . . ? 
C19 N13 C17 122.6(8) . . ? 
C19 N13 C21 111.7(8) . . ? 
C17 N13 C21 123.3(8) . . ? 
C19 N14 C23 123.1(7) . . ? 
C19 N14 C20 111.0(8) . . ? 
C23 N14 C20 125.7(8) . . ? 
C22 N15 C20 110.7(8) . . ? 
C22 N15 C24 121.0(8) . . ? 
C20 N15 C24 124.8(8) . . ? 
C22 N16 C18 124.7(7) . . ? 
C22 N16 C21 110.3(8) . . ? 
C18 N16 C21 124.4(8) . . ? 
C25 N17 C23 122.2(8) . . ? 
C25 N17 C27 110.8(8) . . ? 
C23 N17 C27 126.4(8) . . ? 
C25 N18 C29 122.3(8) . . ? 
C25 N18 C26 112.1(8) . . ? 
C29 N18 C26 124.8(8) . . ? 
C28 N19 C30 121.9(8) . . ? 
C28 N19 C26 111.5(8) . . ? 
C30 N19 C26 118.2(8) . . ? 
C28 N20 C24 125.3(8) . . ? 
C28 N20 C27 112.0(8) . . ? 
C24 N20 C27 122.4(8) . . ? 
C31 N21 C33 112.4(8) . . ? 
C31 N21 C29 122.3(8) . . ? 
C33 N21 C29 124.7(8) . . ? 
C31 N22 C35 121.4(8) . . ? 
C31 N22 C32 113.2(8) . . ? 
C35 N22 C32 121.1(8) . . ? 
C34 N23 C32 112.0(8) . . ? 
C34 N23 C36 119.4(8) . . ? 
C32 N23 C36 127.0(8) . . ? 
C34 N24 C30 121.4(8) . . ? 
C34 N24 C33 112.2(8) . . ? 
C30 N24 C33 125.6(8) . . ? 
O15 N25 O14 124.4(9) . . ? 
O15 N25 O13 119.9(9) . . ? 
O14 N25 O13 115.7(8) . . ? 
O18 N26 O17 122.8(8) . . ? 
O18 N26 O16 120.6(9) . . ? 
O17 N26 O16 116.5(8) . . ? 
O21 N27 O20 122.5(9) . . ? 
O21 N27 O19 121.5(10) . . ? 
O20 N27 O19 116.0(8) . . ? 
O1 C1 N1 127.6(9) . . ? 
O1 C1 N2 123.9(9) . . ? 
N1 C1 N2 108.5(8) . . ? 
N2 C2 N3 116.1(8) . . ? 
N2 C2 C3 101.7(8) . . ? 
N3 C2 C3 102.0(8) . . ? 
N2 C2 H2 112.0 . . ? 
N3 C2 H2 112.0 . . ? 
C3 C2 H2 112.0 . . ? 
N1 C3 N4 114.8(8) . . ? 
N1 C3 C2 101.6(8) . . ? 
N4 C3 C2 102.6(8) . . ? 
N1 C3 H3 112.3 . . ? 
N4 C3 H3 112.3 . . ? 
C2 C3 H3 112.3 . . ? 
O2 C4 N3 125.6(9) . . ? 
O2 C4 N4 124.7(9) . . ? 
N3 C4 N4 109.6(8) . . ? 
N5 C5 N2 115.4(8) . . ? 
N5 C5 H5A 108.4 . . ? 
N2 C5 H5A 108.4 . . ? 
N5 C5 H5B 108.4 . . ? 
N2 C5 H5B 108.4 . . ? 
H5A C5 H5B 107.5 . . ? 
N8 C6 N3 113.3(8) . . ? 
N8 C6 H6A 108.9 . . ? 
N3 C6 H6A 108.9 . . ? 
N8 C6 H6B 108.9 . . ? 
N3 C6 H6B 108.9 . . ? 
H6A C6 H6B 107.7 . . ? 
O3 C7 N5 125.6(9) . . ? 
O3 C7 N6 124.0(9) . . ? 
N5 C7 N6 110.4(8) . . ? 
N7 C8 N6 113.5(8) . . ? 
N7 C8 C9 104.6(8) . . ? 
N6 C8 C9 102.6(8) . . ? 
N7 C8 H8 111.8 . . ? 
N6 C8 H8 111.8 . . ? 
C9 C8 H8 111.8 . . ? 
N5 C9 N8 113.6(8) . . ? 
N5 C9 C8 103.4(7) . . ? 
N8 C9 C8 102.6(7) . . ? 
N5 C9 H9 112.2 . . ? 
N8 C9 H9 112.2 . . ? 
C8 C9 H9 112.2 . . ? 
O4 C10 N8 126.7(9) . . ? 
O4 C10 N7 124.5(9) . . ? 
N8 C10 N7 108.8(8) . . ? 
N9 C11 N6 112.6(8) . . ? 
N9 C11 H11A 109.1 . . ? 
N6 C11 H11A 109.1 . . ? 
N9 C11 H11B 109.1 . . ? 
N6 C11 H11B 109.1 . . ? 
H11A C11 H11B 107.8 . . ? 
N12 C12 N7 114.2(8) . . ? 
N12 C12 H12A 108.7 . . ? 
N7 C12 H12A 108.7 . . ? 
N12 C12 H12B 108.7 . . ? 
N7 C12 H12B 108.7 . . ? 
H12A C12 H12B 107.6 . . ? 
O5 C13 N9 125.1(9) . . ? 
O5 C13 N10 124.6(9) . . ? 
N9 C13 N10 110.3(8) . . ? 
N11 C14 N10 114.3(8) . . ? 
N11 C14 C15 102.1(7) . . ? 
N10 C14 C15 103.6(7) . . ? 
N11 C14 H14 112.0 . . ? 
N10 C14 H14 112.0 . . ? 
C15 C14 H14 112.0 . . ? 
N12 C15 N9 113.2(8) . . ? 
N12 C15 C14 103.4(7) . . ? 
N9 C15 C14 102.3(7) . . ? 
N12 C15 H15 112.4 . . ? 
N9 C15 H15 112.4 . . ? 
C14 C15 H15 112.4 . . ? 
O6 C16 N12 127.4(9) . . ? 
O6 C16 N11 126.0(9) . . ? 
N12 C16 N11 106.5(8) . . ? 
N13 C17 N10 113.1(7) . . ? 
N13 C17 H17A 109.0 . . ? 
N10 C17 H17A 109.0 . . ? 
N13 C17 H17B 109.0 . . ? 
N10 C17 H17B 109.0 . . ? 
H17A C17 H17B 107.8 . . ? 
N16 C18 N11 114.2(8) . . ? 
N16 C18 H18A 108.7 . . ? 
N11 C18 H18A 108.7 . . ? 
N16 C18 H18B 108.7 . . ? 
N11 C18 H18B 108.7 . . ? 
H18A C18 H18B 107.6 . . ? 
O7 C19 N13 127.1(9) . . ? 
O7 C19 N14 123.9(9) . . ? 
N13 C19 N14 109.0(8) . . ? 
N15 C20 N14 115.0(7) . . ? 
N15 C20 C21 102.6(7) . . ? 
N14 C20 C21 103.5(7) . . ? 
N15 C20 H20 111.6 . . ? 
N14 C20 H20 111.6 . . ? 
C21 C20 H20 111.6 . . ? 
N16 C21 N13 113.3(7) . . ? 
N16 C21 C20 103.3(7) . . ? 
N13 C21 C20 102.0(7) . . ? 
N16 C21 H21 112.5 . . ? 
N13 C21 H21 112.5 . . ? 
C20 C21 H21 112.5 . . ? 
O8 C22 N16 125.1(9) . . ? 
O8 C22 N15 124.0(9) . . ? 
N16 C22 N15 110.8(7) . . ? 
N17 C23 N14 115.3(8) . . ? 
N17 C23 H23C 108.5 . . ? 
N14 C23 H23C 108.5 . . ? 
N17 C23 H23D 108.5 . . ? 
N14 C23 H23D 108.5 . . ? 
H23C C23 H23D 107.5 . . ? 
N15 C24 N20 113.7(8) . . ? 
N15 C24 H24C 108.8 . . ? 
N20 C24 H24C 108.8 . . ? 
N15 C24 H24D 108.8 . . ? 
N20 C24 H24D 108.8 . . ? 
H24C C24 H24D 107.7 . . ? 
O9 C25 N17 127.4(9) . . ? 
O9 C25 N18 124.1(9) . . ? 
N17 C25 N18 108.4(8) . . ? 
N18 C26 N19 113.1(8) . . ? 
N18 C26 C27 103.6(7) . . ? 
N19 C26 C27 104.7(8) . . ? 
N18 C26 H26 111.7 . . ? 
N19 C26 H26 111.7 . . ? 
C27 C26 H26 111.7 . . ? 
N17 C27 N20 114.9(8) . . ? 
N17 C27 C26 104.8(8) . . ? 
N20 C27 C26 101.9(8) . . ? 
N17 C27 H27 111.5 . . ? 
N20 C27 H27 111.5 . . ? 
C26 C27 H27 111.5 . . ? 
O10 C28 N19 125.1(9) . . ? 
O10 C28 N20 125.4(9) . . ? 
N19 C28 N20 109.5(8) . . ? 
N18 C29 N21 115.6(8) . . ? 
N18 C29 H29A 108.4 . . ? 
N21 C29 H29A 108.4 . . ? 
N18 C29 H29B 108.4 . . ? 
N21 C29 H29B 108.4 . . ? 
H29A C29 H29B 107.4 . . ? 
N24 C30 N19 113.1(8) . . ? 
N24 C30 H30A 109.0 . . ? 
N19 C30 H30A 109.0 . . ? 
N24 C30 H30B 109.0 . . ? 
N19 C30 H30B 109.0 . . ? 
H30A C30 H30B 107.8 . . ? 
O11 C31 N22 126.0(10) . . ? 
O11 C31 N21 126.1(9) . . ? 
N22 C31 N21 107.8(8) . . ? 
N23 C32 N22 114.6(9) . . ? 
N23 C32 C33 102.9(8) . . ? 
N22 C32 C33 101.5(7) . . ? 
N23 C32 H32 112.3 . . ? 
N22 C32 H32 112.3 . . ? 
C33 C32 H32 112.3 . . ? 
N21 C33 N24 113.7(8) . . ? 
N21 C33 C32 104.0(8) . . ? 
N24 C33 C32 102.1(8) . . ? 
N21 C33 H33 112.1 . . ? 
N24 C33 H33 112.1 . . ? 
C32 C33 H33 112.1 . . ? 
O12 C34 N24 125.4(9) . . ? 
O12 C34 N23 125.6(9) . . ? 
N24 C34 N23 108.7(8) . . ? 
N22 C35 N1 114.2(8) . . ? 
N22 C35 H35A 108.7 . . ? 
N1 C35 H35A 108.7 . . ? 
N22 C35 H35B 108.7 . . ? 
N1 C35 H35B 108.7 . . ? 
H35A C35 H35B 107.6 . . ? 
N4 C36 N23 114.0(8) . . ? 
N4 C36 H36A 108.8 . . ? 
N23 C36 H36A 108.8 . . ? 
N4 C36 H36B 108.8 . . ? 
N23 C36 H36B 108.8 . . ? 
H36A C36 H36B 107.6 . . ? 
 
loop_ 
 _geom_hbond_atom_site_label_D 
 _geom_hbond_atom_site_label_H 
 _geom_hbond_atom_site_label_A 
 _geom_hbond_distance_DH 
 _geom_hbond_distance_HA 
 _geom_hbond_distance_DA 
 _geom_hbond_angle_DHA 
 _geom_hbond_site_symmetry_A 
O22 H22A O35  1.00 1.77 2.741(11) 163.2 . 
O22 H22B O37  0.88 2.13 2.848(10) 138.3 3 
O23 H23A O7  0.81 1.98 2.748(9) 157.7 . 
O23 H23B O11  0.80 2.07 2.721(9) 137.9 . 
O24 H24A O4  0.83 2.18 2.912(10) 146.5 . 
O24 H24B O8  0.79 1.93 2.686(9) 160.0 . 
O25 H25A O7  0.92 1.94 2.779(9) 150.6 1_455 
O25 H25B O17  0.89 2.25 2.935(9) 134.3 1_455 
O26 H26A O9  0.79 1.90 2.628(10) 153.8 1_455 
O39 H39A O40  0.99 1.94 2.85(2) 151.5 1_455 

#===END

data_8 
 
_audit_creation_method            SHELXL-97 
_chemical_name_systematic         ?
_chemical_name_common             ? 
_chemical_melting_point           ? 
_chemical_formula_moiety          ? 
_chemical_formula_sum             'C72 H112 Ce3 N48 O80 Re9' 
_chemical_formula_weight          5026.26 
 
loop_ 
 _atom_type_symbol 
 _atom_type_description 
 _atom_type_scat_dispersion_real 
 _atom_type_scat_dispersion_imag 
 _atom_type_scat_source 
 'C'  'C'   0.0033   0.0016 
 'International Tables Vol C Tables 4.2.6.8 and 6.1.1.4' 
 'H'  'H'   0.0000   0.0000 
 'International Tables Vol C Tables 4.2.6.8 and 6.1.1.4' 
 'N'  'N'   0.0061   0.0033 
 'International Tables Vol C Tables 4.2.6.8 and 6.1.1.4' 
 'O'  'O'   0.0106   0.0060 
 'International Tables Vol C Tables 4.2.6.8 and 6.1.1.4' 
 'Re'  'Re'  -1.0185   7.2310 
 'International Tables Vol C Tables 4.2.6.8 and 6.1.1.4' 
 'Ce'  'Ce'  -0.2486   2.6331 
 'International Tables Vol C Tables 4.2.6.8 and 6.1.1.4' 
 
_symmetry_cell_setting            monoclinic
_symmetry_space_group_name_H-M    'C c'
 
loop_ 
 _symmetry_equiv_pos_as_xyz 
 'x, y, z' 
 'x, -y, z+1/2' 
 'x+1/2, y+1/2, z' 
 'x+1/2, -y+1/2, z+1/2' 
 
_cell_length_a                    14.1241(4) 
_cell_length_b                    44.1171(18) 
_cell_length_c                    21.0763(7) 
_cell_angle_alpha                 90.00 
_cell_angle_beta                  104.696(2) 
_cell_angle_gamma                 90.00 
_cell_volume                      12703.3(8) 
_cell_formula_units_Z             4 
_cell_measurement_temperature     100(2) 
_cell_measurement_reflns_used     132719
_cell_measurement_theta_min       3.42
_cell_measurement_theta_max       25.68
 
_exptl_crystal_description        parallelepiped
_exptl_crystal_colour             colourless
_exptl_crystal_size_max           0.10
_exptl_crystal_size_mid           0.10
_exptl_crystal_size_min           0.08
_exptl_crystal_density_meas       ? 
_exptl_crystal_density_diffrn     2.628 
_exptl_crystal_density_method     'not measured' 
_exptl_crystal_F_000              9476 
_exptl_absorpt_coefficient_mu     9.718 
_exptl_absorpt_correction_type    'multi-scan'
_exptl_absorpt_correction_T_min   0.354
_exptl_absorpt_correction_T_max   0.460
_exptl_absorpt_process_details    
'SCALEPACK (Otwinowski & Minor, 1997)'  
_exptl_special_details
'crystal-to-detector distance 40 mm'
_diffrn_ambient_temperature       100(2)
_diffrn_radiation_wavelength      0.71073 
_diffrn_radiation_type            MoK\a 
_diffrn_radiation_source          'fine-focus sealed tube' 
_diffrn_radiation_monochromator   graphite 
_diffrn_measurement_device_type   
'Nonius Kappa-CCD area-detector diffractometer'  
_diffrn_measurement_method        
'two \f and five \w scans with 2\% steps (419 frames)' 
_diffrn_standards_interval_time   0
_diffrn_standards_number          0
_diffrn_standards_decay_%         0
_diffrn_reflns_number             132719
_diffrn_reflns_av_R_equivalents   0.0512 
_diffrn_reflns_av_sigmaI/netI     0.0749 
_diffrn_reflns_limit_h_min        -17 
_diffrn_reflns_limit_h_max        17 
_diffrn_reflns_limit_k_min        -53 
_diffrn_reflns_limit_k_max        53 
_diffrn_reflns_limit_l_min        -25 
_diffrn_reflns_limit_l_max        25 
_diffrn_reflns_theta_min          3.42 
_diffrn_reflns_theta_max          25.68 
_reflns_number_total              23663 
_reflns_number_gt                 19033 
_reflns_threshold_expression      >2sigma(I) 
 
_computing_data_collection        'COLLECT (Nonius, 1998)'
_computing_cell_refinement        'HKL2000 (Otwinowski & Minor, 1997)'
_computing_data_reduction         'HKL2000 (Otwinowski & Minor, 1997)'
_computing_structure_solution     'SHELXS-97 (Sheldrick, 1997)' 
_computing_structure_refinement   'SHELXL-97 (Sheldrick, 1997)' 
_computing_molecular_graphics     'SHELXTL (Sheldrick, 1999)' 
_computing_publication_material   
'SHELXTL (Sheldrick, 1999); PLATON (Spek, 2003)' 
 
_refine_special_details 
;
 Structure solved by direct methods and subsequent Fourier-difference
 synthesis. All non-hydrogen atoms were refined with anisotropic
 displacement parameters. Many restraints on bond lengths and/or 
 displacement parameters were necessary for the very badly resolved 
 counter-ions and solvent molecules. The H atoms bound to O atoms were 
 not found; the C-bound H atoms were introduced at calculated positions
 and were treated as riding atoms with an isotropic displacement
 parameter equal to 1.2 times that of the parent atom. The highest 
 residual electron density peaks are located near the Re atoms and
 may be indicative of unresolved disorder. Some short O...O and O...C
 contacts involving the O atoms of the badly resolved perrhenate 
 counter-ions are also likely due to the imperfect description of these
 moieties.
 Refinement of F^2^ against ALL reflections.  The weighted R-factor wR and 
 goodness of fit S are based on F^2^, conventional R-factors R are based 
 on F, with F set to zero for negative F^2^. The threshold expression of 
 F^2^ > 2sigma(F^2^) is used only for calculating R-factors(gt) etc. and is 
 not relevant to the choice of reflections for refinement.  R-factors based 
 on F^2^ are statistically about twice as large as those based on F, and R- 
 factors based on ALL data will be even larger. 
;
_refine_ls_structure_factor_coef  Fsqd  
_refine_ls_matrix_type            fullcycle 
_refine_ls_weighting_scheme       calc  
_refine_ls_weighting_details 
 'calc w=1/[\s^2^(Fo^2^)+(0.1113P)^2^] where P=(Fo^2^+2Fc^2^)/3' 
_atom_sites_solution_primary      direct 
_atom_sites_solution_secondary    difmap 
_atom_sites_solution_hydrogens    geom 
_refine_ls_hydrogen_treatment     constr
_refine_ls_extinction_method      none 
_refine_ls_extinction_coef        ? 
_refine_ls_abs_structure_details 
 'Flack H D (1983), Acta Cryst. A39, 876-881' 
_refine_ls_abs_structure_Flack    0.509(7) 
_refine_ls_number_reflns          23663 
_refine_ls_number_parameters      1910 
_refine_ls_number_restraints      172
_refine_ls_R_factor_all           0.0789 
_refine_ls_R_factor_gt            0.0594 
_refine_ls_wR_factor_ref          0.1604 
_refine_ls_wR_factor_gt           0.1497 
_refine_ls_goodness_of_fit_ref    1.009 
_refine_ls_restrained_S_all       1.009 
_refine_ls_shift/su_max           0.003
_refine_ls_shift/su_mean          0.001  
_diffrn_measured_fraction_theta_max    0.996 
_diffrn_reflns_theta_full              25.68 
_diffrn_measured_fraction_theta_full   0.996 
_refine_diff_density_max    4.137 
_refine_diff_density_min   -3.577 
_refine_diff_density_rms    0.269 
 
loop_ 
 _atom_site_label 
 _atom_site_type_symbol 
 _atom_site_fract_x 
 _atom_site_fract_y 
 _atom_site_fract_z 
 _atom_site_U_iso_or_equiv 
 _atom_site_adp_type 
 _atom_site_occupancy 
 _atom_site_symmetry_multiplicity 
 _atom_site_calc_flag 
 _atom_site_refinement_flags 
 _atom_site_disorder_assembly 
 _atom_site_disorder_group 
Ce1 Ce 0.46118(11) 0.381706(19) 0.80533(7) 0.02291(19) Uani 1 1 d . . . 
Ce2 Ce 0.64822(11) 0.523994(19) 1.03727(7) 0.02107(19) Uani 1 1 d . . . 
Ce3 Ce 0.72851(12) 0.27875(2) 1.01336(8) 0.0312(2) Uani 1 1 d . . . 
Re1 Re 0.56246(10) 0.436912(13) 0.96910(7) 0.01947(13) Uani 1 1 d . . . 
Re2 Re 0.81710(11) 0.194753(15) 1.07592(7) 0.02997(16) Uani 1 1 d . . . 
Re3 Re 0.24034(11) 0.176907(15) 0.85254(7) 0.02994(16) Uani 1 1 d . . . 
Re4 Re 0.86128(11) 0.279404(17) 0.75954(7) 0.03546(17) Uani 1 1 d . . . 
Re5 Re 0.03891(11) 0.356138(19) 0.89074(7) 0.04116(19) Uani 1 1 d . . . 
Re6 Re 0.64081(12) 0.14427(3) 0.66833(8) 0.0716(3) Uani 1 1 d D . . 
Re7 Re 0.91481(14) 0.44009(2) 1.32130(8) 0.0779(4) Uani 1 1 d D . . 
Re8 Re 1.09943(12) 0.51897(3) 1.08196(9) 0.0839(4) Uani 1 1 d D . . 
Re9 Re 0.8666(5) 0.23613(18) 0.5389(3) 0.0969(18) Uani 1 1 d D . . 
O1 O 0.5886(8) 0.4186(2) 0.7792(5) 0.024(2) Uani 1 1 d . . . 
O2 O 0.7093(8) 0.5304(2) 0.9402(5) 0.028(2) Uani 1 1 d . . . 
O3 O 0.3686(7) 0.4244(2) 0.7522(5) 0.022(2) Uani 1 1 d . . . 
O4 O 0.4759(8) 0.5210(2) 0.9539(5) 0.028(2) Uani 1 1 d . . . 
O5 O 0.3409(8) 0.3873(3) 0.8839(5) 0.029(3) Uani 1 1 d . . . 
O6 O 0.3456(8) 0.4891(2) 1.0660(5) 0.030(3) Uani 1 1 d . . . 
O7 O 0.4831(10) 0.3434(3) 1.0150(6) 0.040(3) Uani 1 1 d . . . 
O8 O 0.4847(9) 0.4525(2) 1.1834(5) 0.033(3) Uani 1 1 d . . . 
O9 O 0.7072(7) 0.3323(2) 1.0386(5) 0.024(2) Uani 1 1 d . . . 
O10 O 0.7003(9) 0.4530(3) 1.1582(6) 0.035(3) Uani 1 1 d . . . 
O11 O 0.7533(8) 0.3762(3) 0.9131(5) 0.031(3) Uani 1 1 d . . . 
O12 O 0.8140(8) 0.4932(2) 1.0510(5) 0.030(3) Uani 1 1 d . . . 
O13 O 0.4494(8) 0.3254(2) 0.7984(6) 0.031(3) Uani 1 1 d . . . 
O14 O 0.2355(9) 0.2204(2) 0.6448(6) 0.039(3) Uani 1 1 d . . . 
O15 O 0.2839(8) 0.3675(3) 0.7518(5) 0.027(2) Uani 1 1 d . . . 
O16 O 0.0324(12) 0.2741(3) 0.5869(9) 0.078(6) Uani 1 1 d . . . 
O17 O 0.2731(9) 0.3985(2) 0.5952(6) 0.033(3) Uani 1 1 d . . . 
O18 O -0.0248(9) 0.3104(3) 0.4495(6) 0.045(3) Uani 1 1 d . . . 
O19 O 0.4286(10) 0.3924(3) 0.4845(5) 0.038(3) Uani 1 1 d . . . 
O20 O 0.1263(9) 0.2950(3) 0.3527(6) 0.040(3) Uani 1 1 d . . . 
O21 O 0.6135(9) 0.3477(3) 0.5246(6) 0.037(3) Uani 1 1 d . . . 
O22 O 0.3278(9) 0.2476(3) 0.4406(5) 0.034(3) Uani 1 1 d . . . 
O23 O 0.6080(8) 0.3150(2) 0.6836(5) 0.028(2) Uani 1 1 d . . . 
O24 O 0.3880(9) 0.2008(3) 0.5712(5) 0.035(3) Uani 1 1 d . . . 
O25 O 0.5136(8) 0.4259(2) 0.8862(5) 0.027(2) Uani 1 1 d . . . 
O26 O 0.6222(8) 0.4719(2) 0.9747(5) 0.026(2) Uani 1 1 d . . . 
O27 O 0.6458(8) 0.4100(3) 1.0081(5) 0.036(3) Uani 1 1 d . . . 
O28 O 0.4685(8) 0.4381(2) 1.0060(6) 0.028(3) Uani 1 1 d . . . 
O29 O 0.8138(9) 0.2345(2) 1.0714(5) 0.036(3) Uani 1 1 d . . . 
O30 O 0.7079(14) 0.1785(4) 1.0384(11) 0.096(6) Uani 1 1 d . . . 
O31 O 0.8458(14) 0.1838(4) 1.1561(5) 0.072(4) Uani 1 1 d . . . 
O32 O 0.9061(15) 0.1831(5) 1.0363(11) 0.093(6) Uani 1 1 d . . . 
O33 O 0.4343(9) 0.3738(3) 0.6848(5) 0.033(3) Uani 1 1 d . . . 
O34 O 0.6120(9) 0.3560(2) 0.7843(6) 0.032(3) Uani 1 1 d . . . 
O35 O 0.5581(8) 0.3595(3) 0.9133(5) 0.031(3) Uani 1 1 d . . . 
O36 O 0.7927(9) 0.5589(2) 1.0671(5) 0.030(3) Uani 1 1 d . . . 
O37 O 0.5991(9) 0.5754(3) 0.9834(5) 0.036(3) Uani 1 1 d . . . 
O38 O 0.5472(8) 0.4916(2) 1.0914(5) 0.028(2) Uani 1 1 d . . . 
O39 O 0.5640(9) 0.5571(2) 1.1025(5) 0.030(3) Uani 1 1 d . . . 
O40 O 0.7398(8) 0.5132(2) 1.1557(5) 0.027(2) Uani 1 1 d . . . 
O41 O 0.6309(10) 0.2343(3) 0.9657(7) 0.054(4) Uani 1 1 d . . . 
O42 O 0.5787(13) 0.2931(4) 0.9190(8) 0.068(4) Uani 1 1 d . . . 
O43 O 0.7590(13) 0.3118(3) 0.9234(7) 0.063(4) Uani 1 1 d . . . 
O44 O 0.5656(14) 0.2793(5) 1.0472(10) 0.093(6) Uani 1 1 d . . . 
O45 O 0.2785(10) 0.1549(4) 0.9197(7) 0.056(4) Uani 1 1 d . . . 
O46 O 0.2223(13) 0.2126(3) 0.8782(8) 0.068(5) Uani 1 1 d . . . 
O47 O 0.1319(9) 0.1632(3) 0.8037(7) 0.052(4) Uani 1 1 d . . . 
O48 O 0.3206(9) 0.1783(3) 0.8035(5) 0.034(3) Uani 1 1 d . . . 
O49 O 0.7754(11) 0.2839(3) 0.8070(7) 0.056(4) Uani 1 1 d . . . 
O50 O 0.8248(13) 0.2504(4) 0.7013(7) 0.071(5) Uani 1 1 d . . . 
O51 O 0.8649(9) 0.3121(3) 0.7167(6) 0.038(3) Uani 1 1 d . . . 
O52 O 0.9718(8) 0.2718(3) 0.8087(7) 0.051(4) Uani 1 1 d . . . 
O53 O 0.0672(16) 0.3749(6) 0.8212(11) 0.108(7) Uani 1 1 d . . . 
O54 O -0.0661(14) 0.3394(5) 0.8620(11) 0.098(6) Uani 1 1 d . . . 
O55 O 0.0358(11) 0.3825(4) 0.9457(7) 0.062(4) Uani 1 1 d . . . 
O56 O 0.1303(10) 0.3303(3) 0.9205(7) 0.048(3) Uani 1 1 d . . . 
O57 O 0.7039(15) 0.1795(3) 0.6808(14) 0.091(12) Uani 1 1 d DU . . 
O58 O 0.6119(17) 0.1354(6) 0.5859(5) 0.14(2) Uani 1 1 d DU . . 
O59 O 0.7218(13) 0.1171(4) 0.7139(9) 0.130(9) Uani 1 1 d DU . . 
O60 O 0.5379(9) 0.1470(4) 0.6984(9) 0.094(6) Uani 1 1 d DU . . 
O61 O 0.9406(13) 0.4095(3) 1.2802(7) 0.088(3) Uani 1 1 d DU . . 
O62 O 1.0155(13) 0.4520(5) 1.3798(9) 0.088(3) Uani 1 1 d DU . . 
O63 O 0.8715(13) 0.4692(3) 1.2679(7) 0.088(3) Uani 1 1 d DU . . 
O64 O 0.8243(16) 0.4306(6) 1.3601(13) 0.088(3) Uani 1 1 d DU . . 
O65 O 1.1779(15) 0.5157(6) 1.1573(7) 0.067(8) Uani 1 1 d D . . 
O66 O 0.9937(9) 0.5368(5) 1.0854(10) 0.046(6) Uani 1 1 d D . . 
O67 O 1.1637(16) 0.5419(4) 1.0410(12) 0.100(9) Uani 1 1 d D . . 
O68 O 1.0827(17) 0.4842(3) 1.0433(9) 0.096(8) Uani 1 1 d D . . 
O69 O 0.9371(12) 0.2173(4) 0.6066(7) 0.0973(18) Uani 1 1 d DU . . 
O70 O 0.837(3) 0.2724(4) 0.5612(14) 0.0971(18) Uani 1 1 d DU . . 
O71 O 0.7579(16) 0.2159(6) 0.5069(16) 0.0971(18) Uani 1 1 d DU . . 
O72 O 0.931(2) 0.2391(10) 0.4783(11) 0.0971(18) Uani 1 1 d DU . . 
O73 O 0.5920(8) 0.3831(2) 0.6260(5) 0.031(3) Uani 1 1 d . . . 
O74 O 0.7659(11) 0.3697(3) 0.7200(7) 0.054(4) Uani 1 1 d . . . 
O75 O 0.786(3) 0.6173(7) 1.0467(17) 0.164(12) Uani 1 1 d U . . 
O76 O 0.3736(9) 0.5505(3) 1.0781(6) 0.041(3) Uani 1 1 d . . . 
O77 O 0.9267(15) 0.5341(5) 1.2071(10) 0.093(6) Uani 1 1 d . . . 
O78 O 0.9296(12) 0.4041(3) 0.7230(10) 0.075(5) Uani 1 1 d . . . 
O79 O 1.0261(19) 0.5206(6) 1.3338(13) 0.121(8) Uani 1 1 d U . . 
O80 O 0.8899(18) 0.0881(5) 0.7928(11) 0.108(7) Uani 1 1 d . . . 
N1 N 0.7192(10) 0.4508(3) 0.8207(6) 0.026(3) Uani 1 1 d . . . 
N2 N 0.5837(10) 0.4706(3) 0.7639(6) 0.027(3) Uani 1 1 d . . . 
N3 N 0.6254(10) 0.5150(3) 0.8367(6) 0.026(3) Uani 1 1 d . . . 
N4 N 0.7749(11) 0.4980(3) 0.8777(6) 0.030(3) Uani 1 1 d . . . 
N5 N 0.4081(10) 0.4757(3) 0.7565(6) 0.027(3) Uani 1 1 d . . . 
N6 N 0.2925(9) 0.4602(3) 0.8021(6) 0.028(3) Uani 1 1 d . . . 
N7 N 0.3374(9) 0.4994(3) 0.8874(6) 0.028(3) Uani 1 1 d . . . 
N8 N 0.4540(10) 0.5145(3) 0.8410(6) 0.025(3) Uani 1 1 d . . . 
N9 N 0.2448(11) 0.4306(3) 0.8862(7) 0.031(3) Uani 1 1 d . . . 
N10 N 0.2766(10) 0.3999(3) 0.9726(7) 0.032(3) Uani 1 1 d . . . 
N11 N 0.2696(12) 0.4418(3) 1.0448(8) 0.036(4) Uani 1 1 d . . . 
N12 N 0.2659(9) 0.4728(3) 0.9635(6) 0.024(3) Uani 1 1 d . . . 
N13 N 0.3793(10) 0.3717(3) 1.0620(6) 0.026(3) Uani 1 1 d . . . 
N14 N 0.5283(11) 0.3544(3) 1.1248(7) 0.033(3) Uani 1 1 d . . . 
N15 N 0.5304(11) 0.4012(3) 1.1890(7) 0.035(3) Uani 1 1 d . . . 
N16 N 0.3770(11) 0.4145(4) 1.1362(7) 0.038(4) Uani 1 1 d . . . 
N17 N 0.6990(10) 0.3532(3) 1.1370(7) 0.033(4) Uani 1 1 d . . . 
N18 N 0.8165(9) 0.3686(3) 1.0931(7) 0.027(3) Uani 1 1 d . . . 
N19 N 0.8166(9) 0.4177(3) 1.1419(6) 0.023(3) Uani 1 1 d . . . 
N20 N 0.6984(11) 0.4023(4) 1.1890(7) 0.035(4) Uani 1 1 d . . . 
N21 N 0.8642(9) 0.3960(3) 1.0041(7) 0.025(3) Uani 1 1 d . . . 
N22 N 0.8245(10) 0.4225(3) 0.9096(7) 0.032(3) Uani 1 1 d . . . 
N23 N 0.8731(10) 0.4698(3) 0.9705(7) 0.031(3) Uani 1 1 d . . . 
N24 N 0.8788(10) 0.4439(3) 1.0614(6) 0.030(3) Uani 1 1 d . . . 
N25 N 0.4551(9) 0.2743(3) 0.7794(7) 0.028(3) Uani 1 1 d . . . 
N26 N 0.3259(10) 0.2910(3) 0.8062(7) 0.029(3) Uani 1 1 d . . . 
N27 N 0.2358(10) 0.2526(3) 0.7336(7) 0.029(3) Uani 1 1 d . . . 
N28 N 0.3741(9) 0.2285(3) 0.7283(7) 0.024(3) Uani 1 1 d . . . 
N29 N 0.1941(9) 0.3263(3) 0.7669(7) 0.028(3) Uani 1 1 d . . . 
N30 N 0.1277(10) 0.3597(3) 0.6868(8) 0.036(4) Uani 1 1 d . . . 
N31 N 0.0167(10) 0.3215(3) 0.6293(8) 0.033(3) Uani 1 1 d . . . 
N32 N 0.1002(11) 0.2862(3) 0.6942(9) 0.043(4) Uani 1 1 d . . . 
N33 N 0.1150(11) 0.3850(3) 0.5851(8) 0.040(4) Uani 1 1 d . . . 
N34 N 0.1626(10) 0.3932(3) 0.4947(7) 0.031(3) Uani 1 1 d . . . 
N35 N 0.0373(14) 0.3581(4) 0.4339(8) 0.051(5) Uani 1 1 d . . . 
N36 N -0.0091(11) 0.3498(4) 0.5251(8) 0.042(4) Uani 1 1 d . . . 
N37 N 0.2686(11) 0.3828(3) 0.4266(7) 0.031(3) Uani 1 1 d . . . 
N38 N 0.3925(12) 0.3590(3) 0.3987(6) 0.034(4) Uani 1 1 d . . . 
N39 N 0.2735(16) 0.3178(3) 0.3560(8) 0.052(5) Uani 1 1 d . . . 
N40 N 0.1470(12) 0.3465(3) 0.3641(8) 0.044(4) Uani 1 1 d . . . 
N41 N 0.5306(11) 0.3240(3) 0.4270(6) 0.031(3) Uani 1 1 d . . . 
N42 N 0.6045(11) 0.2957(3) 0.5094(7) 0.033(3) Uani 1 1 d . . . 
N43 N 0.4965(14) 0.2528(4) 0.4713(8) 0.047(4) Uani 1 1 d . . . 
N44 N 0.4074(12) 0.2838(3) 0.3993(6) 0.034(3) Uani 1 1 d . . . 
N45 N 0.6203(9) 0.2732(3) 0.6199(7) 0.031(3) Uani 1 1 d . . . 
N46 N 0.5645(9) 0.2664(3) 0.7066(6) 0.020(3) Uani 1 1 d . . . 
N47 N 0.4905(9) 0.2161(3) 0.6674(6) 0.023(3) Uani 1 1 d . . . 
N48 N 0.5293(12) 0.2277(4) 0.5753(8) 0.043(4) Uani 1 1 d . . . 
C1 C 0.6278(11) 0.4448(4) 0.7882(7) 0.024(3) Uani 1 1 d . . . 
C2 C 0.6413(13) 0.4961(4) 0.7816(8) 0.029(4) Uani 1 1 d . . . 
H2 H 0.6432 0.5085 0.7433 0.035 Uiso 1 1 calc R . . 
C3 C 0.7461(12) 0.4825(3) 0.8160(7) 0.022(3) Uani 1 1 d . . . 
H3 H 0.7933 0.4852 0.7895 0.026 Uiso 1 1 calc R . . 
C4 C 0.6982(15) 0.5159(4) 0.8868(10) 0.040(5) Uani 1 1 d . . . 
C5 C 0.4840(11) 0.4723(4) 0.7218(7) 0.023(3) Uani 1 1 d . . . 
H5A H 0.4802 0.4894 0.6922 0.028 Uiso 1 1 calc R . . 
H5B H 0.4710 0.4541 0.6954 0.028 Uiso 1 1 calc R . . 
C6 C 0.5368(11) 0.5316(3) 0.8337(8) 0.021(3) Uani 1 1 d . . . 
H6A H 0.5509 0.5469 0.8677 0.026 Uiso 1 1 calc R . . 
H6B H 0.5184 0.5420 0.7919 0.026 Uiso 1 1 calc R . . 
C7 C 0.3617(12) 0.4507(4) 0.7682(7) 0.027(4) Uani 1 1 d . . . 
C8 C 0.2986(15) 0.4912(5) 0.8147(9) 0.043(5) Uani 1 1 d . . . 
H8 H 0.2365 0.5015 0.7952 0.052 Uiso 1 1 calc R . . 
C9 C 0.3800(12) 0.5033(4) 0.7877(8) 0.031(4) Uani 1 1 d . . . 
H9 H 0.3562 0.5192 0.7551 0.037 Uiso 1 1 calc R . . 
C10 C 0.4280(14) 0.5126(4) 0.8980(9) 0.034(4) Uani 1 1 d . . . 
C11 C 0.2283(11) 0.4376(4) 0.8182(7) 0.024(3) Uani 1 1 d . . . 
H11A H 0.1613 0.4445 0.8022 0.028 Uiso 1 1 calc R . . 
H11B H 0.2350 0.4191 0.7949 0.028 Uiso 1 1 calc R . . 
C12 C 0.2758(11) 0.5010(4) 0.9300(8) 0.030(4) Uani 1 1 d . . . 
H12A H 0.2114 0.5075 0.9051 0.036 Uiso 1 1 calc R . . 
H12B H 0.3008 0.5165 0.9627 0.036 Uiso 1 1 calc R . . 
C13 C 0.2942(10) 0.4046(4) 0.9122(7) 0.023(3) Uani 1 1 d . . . 
C14 C 0.2236(11) 0.4250(4) 0.9936(8) 0.027(4) Uani 1 1 d . . . 
H14 H 0.1598 0.4182 0.9986 0.033 Uiso 1 1 calc R . . 
C15 C 0.2112(12) 0.4465(4) 0.9372(9) 0.031(4) Uani 1 1 d . . . 
H15 H 0.1419 0.4519 0.9208 0.037 Uiso 1 1 calc R . . 
C16 C 0.3012(12) 0.4691(4) 1.0275(8) 0.031(4) Uani 1 1 d . . . 
C17 C 0.3012(12) 0.3715(4) 1.0071(9) 0.032(4) Uani 1 1 d . . . 
H17A H 0.2439 0.3645 1.0202 0.039 Uiso 1 1 calc R . . 
H17B H 0.3150 0.3568 0.9765 0.039 Uiso 1 1 calc R . . 
C18 C 0.2948(13) 0.4320(4) 1.1171(8) 0.036(4) Uani 1 1 d . . . 
H18A H 0.3035 0.4500 1.1443 0.044 Uiso 1 1 calc R . . 
H18B H 0.2398 0.4208 1.1250 0.044 Uiso 1 1 calc R . . 
C19 C 0.4632(14) 0.3567(4) 1.0627(8) 0.033(4) Uani 1 1 d . . . 
C20 C 0.4846(14) 0.3734(4) 1.1705(8) 0.036(4) Uani 1 1 d . . . 
H20 H 0.4801 0.3616 1.2091 0.043 Uiso 1 1 calc R . . 
C21 C 0.3823(13) 0.3818(4) 1.1284(8) 0.030(4) Uani 1 1 d . . . 
H21 H 0.3314 0.3716 1.1447 0.036 Uiso 1 1 calc R . . 
C22 C 0.4629(13) 0.4259(4) 1.1696(8) 0.031(4) Uani 1 1 d . . . 
C23 C 0.6110(13) 0.3359(4) 1.1412(8) 0.034(4) Uani 1 1 d . . . 
H23A H 0.6023 0.3188 1.1115 0.041 Uiso 1 1 calc R . . 
H23B H 0.6196 0.3283 1.1854 0.041 Uiso 1 1 calc R . . 
C24 C 0.6334(14) 0.4047(5) 1.2270(8) 0.040(5) Uani 1 1 d . . . 
H24A H 0.6413 0.4243 1.2483 0.048 Uiso 1 1 calc R . . 
H24B H 0.6483 0.3893 1.2609 0.048 Uiso 1 1 calc R . . 
C25 C 0.7341(14) 0.3500(4) 1.0837(8) 0.034(4) Uani 1 1 d . . . 
C26 C 0.8307(14) 0.3853(4) 1.1531(7) 0.031(4) Uani 1 1 d . . . 
H26 H 0.8958 0.3812 1.1818 0.037 Uiso 1 1 calc R . . 
C27 C 0.7568(14) 0.3753(4) 1.1833(8) 0.037(5) Uani 1 1 d . . . 
H27 H 0.7853 0.3661 1.2262 0.045 Uiso 1 1 calc R . . 
C28 C 0.7333(13) 0.4269(4) 1.1620(8) 0.031(4) Uani 1 1 d . . . 
C29 C 0.8763(11) 0.3674(4) 1.0447(8) 0.031(4) Uani 1 1 d . . . 
H29A H 0.8567 0.3500 1.0161 0.038 Uiso 1 1 calc R . . 
H29B H 0.9447 0.3649 1.0676 0.038 Uiso 1 1 calc R . . 
C30 C 0.8903(15) 0.4381(4) 1.1301(9) 0.043(5) Uani 1 1 d . . . 
H30A H 0.8867 0.4572 1.1524 0.051 Uiso 1 1 calc R . . 
H30B H 0.9545 0.4295 1.1484 0.051 Uiso 1 1 calc R . . 
C31 C 0.8081(11) 0.3954(3) 0.9410(8) 0.021(3) Uani 1 1 d . . . 
C32 C 0.9012(13) 0.4394(4) 0.9529(8) 0.031(4) Uani 1 1 d . . . 
H32 H 0.9603 0.4401 0.9368 0.037 Uiso 1 1 calc R . . 
C33 C 0.9207(12) 0.4233(4) 1.0211(8) 0.031(4) Uani 1 1 d . . . 
H33 H 0.9903 0.4192 1.0402 0.037 Uiso 1 1 calc R . . 
C34 C 0.8456(11) 0.4710(4) 1.0269(7) 0.022(3) Uani 1 1 d . . . 
C35 C 0.7916(13) 0.4272(4) 0.8410(7) 0.029(4) Uani 1 1 d . . . 
H35A H 0.7644 0.4083 0.8207 0.034 Uiso 1 1 calc R . . 
H35B H 0.8478 0.4321 0.8244 0.034 Uiso 1 1 calc R . . 
C36 C 0.8680(11) 0.4950(3) 0.9271(8) 0.025(3) Uani 1 1 d . . . 
H36A H 0.9200 0.4930 0.9048 0.030 Uiso 1 1 calc R . . 
H36B H 0.8798 0.5135 0.9529 0.030 Uiso 1 1 calc R . . 
C37 C 0.4156(12) 0.2999(4) 0.7947(9) 0.032(4) Uani 1 1 d . . . 
C38 C 0.3043(12) 0.2605(3) 0.7911(9) 0.029(4) Uani 1 1 d . . . 
H38 H 0.2858 0.2509 0.8282 0.035 Uiso 1 1 calc R . . 
C39 C 0.4023(12) 0.2463(4) 0.7846(9) 0.030(4) Uani 1 1 d . . . 
H39 H 0.4346 0.2343 0.8233 0.037 Uiso 1 1 calc R . . 
C40 C 0.2805(15) 0.2324(4) 0.6963(9) 0.039(5) Uani 1 1 d . . . 
C41 C 0.2634(12) 0.3140(4) 0.8246(8) 0.032(4) Uani 1 1 d . . . 
H41A H 0.3039 0.3303 0.8480 0.038 Uiso 1 1 calc R . . 
H41B H 0.2278 0.3051 0.8537 0.038 Uiso 1 1 calc R . . 
C42 C 0.1371(17) 0.2578(4) 0.7213(12) 0.055(6) Uani 1 1 d . . . 
H42A H 0.1186 0.2554 0.7623 0.066 Uiso 1 1 calc R . . 
H42B H 0.1039 0.2421 0.6918 0.066 Uiso 1 1 calc R . . 
C43 C 0.2075(12) 0.3528(4) 0.7367(8) 0.026(4) Uani 1 1 d . . . 
C44 C 0.0490(12) 0.3370(4) 0.6868(9) 0.038(4) Uani 1 1 d . . . 
H44 H -0.0060 0.3467 0.6993 0.046 Uiso 1 1 calc R . . 
C45 C 0.0940(13) 0.3136(4) 0.7356(11) 0.039(5) Uani 1 1 d . . . 
H45 H 0.0558 0.3098 0.7676 0.047 Uiso 1 1 calc R . . 
C46 C 0.0486(13) 0.2900(5) 0.6387(10) 0.046(5) Uani 1 1 d . . . 
C47 C 0.1146(13) 0.3874(4) 0.6532(8) 0.031(4) Uani 1 1 d . . . 
H47A H 0.1663 0.4012 0.6748 0.038 Uiso 1 1 calc R . . 
H47B H 0.0528 0.3961 0.6560 0.038 Uiso 1 1 calc R . . 
C48 C -0.0554(15) 0.3327(5) 0.5703(12) 0.055(6) Uani 1 1 d . . . 
H48A H -0.1021 0.3457 0.5838 0.066 Uiso 1 1 calc R . . 
H48B H -0.0912 0.3156 0.5470 0.066 Uiso 1 1 calc R . . 
C49 C 0.1878(12) 0.3926(4) 0.5604(8) 0.029(4) Uani 1 1 d . . . 
C50 C 0.0588(13) 0.3855(4) 0.4730(9) 0.034(4) Uani 1 1 d . . . 
H50 H 0.0232 0.4026 0.4480 0.041 Uiso 1 1 calc R . . 
C51 C 0.0228(11) 0.3803(4) 0.5290(10) 0.037(5) Uani 1 1 d . . . 
H51 H -0.0295 0.3945 0.5315 0.044 Uiso 1 1 calc R . . 
C52 C 0.0034(18) 0.3376(6) 0.4704(13) 0.068(7) Uani 1 1 d . . . 
C53 C 0.2229(15) 0.4058(4) 0.4534(9) 0.041(4) Uani 1 1 d . . . 
H53A H 0.1819 0.4177 0.4183 0.049 Uiso 1 1 calc R . . 
H53B H 0.2722 0.4192 0.4796 0.049 Uiso 1 1 calc R . . 
C54 C 0.0404(16) 0.3526(6) 0.3693(10) 0.053(6) Uani 1 1 d . . . 
H54A H 0.0138 0.3699 0.3423 0.064 Uiso 1 1 calc R . . 
H54B H -0.0001 0.3351 0.3526 0.064 Uiso 1 1 calc R . . 
C55 C 0.368(2) 0.3785(4) 0.4403(10) 0.057(7) Uani 1 1 d . . . 
C56 C 0.3075(15) 0.3487(4) 0.3510(11) 0.047(5) Uani 1 1 d . . . 
H56 H 0.3147 0.3524 0.3066 0.057 Uiso 1 1 calc R . . 
C57 C 0.2213(15) 0.3679(4) 0.3636(9) 0.046(5) Uani 1 1 d . . . 
H57 H 0.1989 0.3829 0.3287 0.055 Uiso 1 1 calc R . . 
C58 C 0.1774(17) 0.3174(4) 0.3620(10) 0.049(5) Uani 1 1 d . . . 
C59 C 0.4866(14) 0.3523(4) 0.3959(9) 0.035(4) Uani 1 1 d . . . 
H59A H 0.5285 0.3689 0.4159 0.042 Uiso 1 1 calc R . . 
H59B H 0.4875 0.3516 0.3501 0.042 Uiso 1 1 calc R . . 
C60 C 0.3266(13) 0.2935(4) 0.3423(10) 0.040(5) Uani 1 1 d . . . 
H60A H 0.3542 0.2988 0.3061 0.048 Uiso 1 1 calc R . . 
H60B H 0.2826 0.2765 0.3283 0.048 Uiso 1 1 calc R . . 
C61 C 0.5838(13) 0.3249(4) 0.4900(9) 0.034(4) Uani 1 1 d . . . 
C62 C 0.5706(13) 0.2741(4) 0.4590(8) 0.032(4) Uani 1 1 d . . . 
H62 H 0.6234 0.2642 0.4443 0.038 Uiso 1 1 calc R . . 
C63 C 0.5028(16) 0.2942(4) 0.4048(9) 0.042(5) Uani 1 1 d . . . 
H63 H 0.5197 0.2909 0.3631 0.051 Uiso 1 1 calc R . . 
C64 C 0.4055(13) 0.2601(4) 0.4370(7) 0.029(4) Uani 1 1 d . . . 
C65 C 0.6694(13) 0.2872(4) 0.5748(8) 0.033(4) Uani 1 1 d . . . 
H65A H 0.7191 0.2733 0.5678 0.040 Uiso 1 1 calc R . . 
H65B H 0.7025 0.3053 0.5953 0.040 Uiso 1 1 calc R . . 
C66 C 0.5214(16) 0.2248(4) 0.5037(8) 0.039(5) Uani 1 1 d . . . 
H66A H 0.5834 0.2178 0.4972 0.046 Uiso 1 1 calc R . . 
H66B H 0.4720 0.2098 0.4849 0.046 Uiso 1 1 calc R . . 
C67 C 0.5969(11) 0.2875(4) 0.6712(7) 0.024(3) Uani 1 1 d . . . 
C68 C 0.5807(12) 0.2361(4) 0.6874(9) 0.032(4) Uani 1 1 d . . . 
H68 H 0.6330 0.2261 0.7203 0.038 Uiso 1 1 calc R . . 
C69 C 0.6101(12) 0.2408(4) 0.6217(8) 0.028(4) Uani 1 1 d . . . 
H69 H 0.6716 0.2304 0.6219 0.034 Uiso 1 1 calc R . . 
C70 C 0.4666(12) 0.2148(4) 0.6041(9) 0.030(4) Uani 1 1 d . . . 
C71 C 0.5613(10) 0.2737(3) 0.7746(7) 0.017(3) Uani 1 1 d . . . 
H71A H 0.5914 0.2933 0.7871 0.021 Uiso 1 1 calc R . . 
H71B H 0.5977 0.2586 0.8045 0.021 Uiso 1 1 calc R . . 
C72 C 0.4370(12) 0.2051(4) 0.7073(8) 0.029(4) Uani 1 1 d . . . 
H72A H 0.4811 0.1965 0.7460 0.035 Uiso 1 1 calc R . . 
H72B H 0.3955 0.1889 0.6847 0.035 Uiso 1 1 calc R . . 
 
loop_ 
 _atom_site_aniso_label 
 _atom_site_aniso_U_11 
 _atom_site_aniso_U_22 
 _atom_site_aniso_U_33 
 _atom_site_aniso_U_23 
 _atom_site_aniso_U_13 
 _atom_site_aniso_U_12 
Ce1 0.0288(5) 0.0173(4) 0.0229(4) -0.0041(3) 0.0070(4) -0.0022(4) 
Ce2 0.0297(5) 0.0164(4) 0.0182(4) -0.0012(3) 0.0081(3) -0.0023(4) 
Ce3 0.0387(5) 0.0172(5) 0.0355(5) 0.0039(4) 0.0057(4) 0.0026(4) 
Re1 0.0248(3) 0.0154(3) 0.0187(3) -0.0019(2) 0.0064(2) -0.0002(2) 
Re2 0.0364(4) 0.0213(3) 0.0301(3) 0.0068(3) 0.0045(3) 0.0009(3) 
Re3 0.0438(4) 0.0247(3) 0.0231(3) -0.0006(3) 0.0117(3) -0.0019(3) 
Re4 0.0335(4) 0.0344(4) 0.0380(4) 0.0049(3) 0.0082(3) -0.0068(3) 
Re5 0.0292(4) 0.0467(5) 0.0472(4) -0.0163(4) 0.0090(3) -0.0002(3) 
Re6 0.0437(5) 0.0859(8) 0.0863(7) -0.0328(6) 0.0186(5) 0.0040(5) 
Re7 0.1186(9) 0.0529(6) 0.0512(6) -0.0095(5) 0.0012(6) 0.0302(6) 
Re8 0.0538(6) 0.0870(9) 0.1068(9) -0.0311(7) 0.0126(6) -0.0179(6) 
Re9 0.074(3) 0.120(4) 0.095(4) -0.011(3) 0.017(3) -0.007(3) 
O1 0.037(6) 0.019(6) 0.019(5) -0.002(4) 0.016(5) -0.002(5) 
O2 0.047(7) 0.011(5) 0.025(5) -0.001(4) 0.011(5) 0.000(5) 
O3 0.029(6) 0.023(6) 0.017(5) -0.003(4) 0.011(4) -0.005(5) 
O4 0.032(6) 0.034(7) 0.014(5) -0.003(4) 0.001(4) 0.002(5) 
O5 0.025(6) 0.035(7) 0.023(5) 0.005(5) -0.003(4) -0.008(5) 
O6 0.038(7) 0.025(6) 0.031(6) -0.003(5) 0.017(5) -0.003(5) 
O7 0.058(8) 0.031(7) 0.028(6) -0.010(5) 0.005(6) -0.008(6) 
O8 0.059(8) 0.017(6) 0.030(6) -0.004(5) 0.021(5) 0.007(5) 
O9 0.028(6) 0.004(5) 0.041(6) -0.002(4) 0.009(5) -0.002(4) 
O10 0.038(7) 0.026(6) 0.038(6) -0.001(5) 0.003(5) 0.001(5) 
O11 0.044(7) 0.029(6) 0.018(5) -0.004(5) 0.001(5) 0.000(5) 
O12 0.043(7) 0.018(6) 0.028(6) 0.000(5) 0.005(5) 0.002(5) 
O13 0.036(6) 0.019(5) 0.041(6) -0.002(4) 0.015(5) -0.016(4) 
O14 0.036(7) 0.019(6) 0.051(7) 0.011(5) -0.006(6) -0.013(5) 
O15 0.033(6) 0.029(6) 0.020(5) 0.000(5) 0.011(5) -0.001(5) 
O16 0.073(11) 0.018(7) 0.116(14) -0.005(8) -0.027(10) -0.004(7) 
O17 0.046(7) 0.017(6) 0.034(6) 0.002(5) 0.006(5) 0.002(5) 
O18 0.033(7) 0.049(8) 0.044(8) -0.015(6) -0.010(6) -0.014(6) 
O19 0.061(8) 0.020(6) 0.029(6) -0.011(5) 0.007(6) -0.011(6) 
O20 0.040(7) 0.031(7) 0.033(6) 0.005(5) -0.019(5) 0.002(5) 
O21 0.048(7) 0.025(6) 0.043(7) 0.005(5) 0.020(6) -0.010(5) 
O22 0.049(7) 0.025(6) 0.029(6) -0.006(5) 0.014(5) -0.013(5) 
O23 0.032(6) 0.009(5) 0.038(6) -0.001(5) 0.004(5) -0.008(4) 
O24 0.042(7) 0.032(7) 0.022(6) -0.005(5) -0.008(5) -0.005(5) 
O25 0.044(7) 0.015(6) 0.022(5) 0.008(4) 0.006(5) 0.011(5) 
O26 0.030(6) 0.027(6) 0.027(6) -0.003(5) 0.015(5) 0.001(5) 
O27 0.036(7) 0.038(7) 0.029(6) 0.003(5) -0.003(5) 0.020(5) 
O28 0.032(6) 0.027(6) 0.037(6) -0.009(5) 0.031(5) -0.005(5) 
O29 0.058(8) 0.013(5) 0.026(6) 0.010(5) -0.009(5) -0.002(5) 
O30 0.078(9) 0.067(9) 0.124(10) 0.005(8) -0.007(8) 0.004(7) 
O31 0.101(9) 0.052(7) 0.059(7) 0.023(6) 0.015(7) -0.004(7) 
O32 0.100(9) 0.089(9) 0.105(9) -0.006(8) 0.057(8) 0.006(8) 
O33 0.048(7) 0.039(7) 0.015(5) -0.009(5) 0.012(5) -0.003(6) 
O34 0.046(7) 0.022(6) 0.034(6) -0.009(5) 0.020(5) -0.002(5) 
O35 0.034(6) 0.026(6) 0.031(6) 0.004(5) 0.008(5) -0.001(5) 
O36 0.048(7) 0.022(6) 0.027(6) -0.002(5) 0.023(5) -0.011(5) 
O37 0.049(7) 0.028(6) 0.030(6) -0.005(5) 0.008(5) 0.003(5) 
O38 0.034(6) 0.024(6) 0.025(6) -0.005(5) 0.007(5) -0.001(5) 
O39 0.051(7) 0.009(5) 0.033(6) 0.006(4) 0.017(5) 0.007(5) 
O40 0.031(6) 0.022(6) 0.027(6) -0.009(5) 0.006(5) -0.002(5) 
O41 0.053(8) 0.023(7) 0.072(10) 0.003(6) -0.010(7) 0.015(6) 
O42 0.100(13) 0.053(10) 0.055(9) -0.008(8) 0.024(9) -0.005(9) 
O43 0.120(13) 0.030(8) 0.053(9) 0.023(7) 0.048(9) 0.015(8) 
O44 0.082(9) 0.089(9) 0.098(9) -0.017(8) 0.005(7) -0.017(7) 
O45 0.044(8) 0.073(10) 0.043(8) 0.043(7) -0.004(6) -0.009(7) 
O46 0.122(14) 0.027(7) 0.089(11) 0.011(7) 0.087(11) 0.001(8) 
O47 0.042(8) 0.062(9) 0.053(8) -0.038(7) 0.013(6) -0.013(7) 
O48 0.040(7) 0.037(7) 0.026(6) 0.000(5) 0.012(5) 0.003(5) 
O49 0.056(4) 0.057(4) 0.056(4) 0.0007(10) 0.0148(14) -0.0005(10) 
O50 0.091(12) 0.065(11) 0.045(9) 0.008(8) -0.003(8) -0.026(9) 
O51 0.045(7) 0.025(7) 0.038(7) 0.007(5) -0.005(6) -0.005(5) 
O52 0.015(6) 0.071(10) 0.058(8) 0.037(7) -0.010(6) 0.001(6) 
O53 0.091(15) 0.14(2) 0.095(15) 0.018(14) 0.020(12) 0.037(14) 
O54 0.073(9) 0.099(10) 0.116(10) -0.023(8) 0.014(8) -0.002(7) 
O55 0.054(9) 0.068(11) 0.064(10) -0.037(8) 0.016(7) -0.003(7) 
O56 0.042(7) 0.037(8) 0.066(9) 0.002(7) 0.014(7) -0.002(6) 
O57 0.092(12) 0.090(12) 0.093(12) 0.000(5) 0.024(6) -0.005(5) 
O58 0.14(2) 0.15(2) 0.14(2) -0.002(5) 0.039(7) 0.002(5) 
O59 0.133(12) 0.138(12) 0.120(11) 0.000(9) 0.031(9) 0.011(9) 
O60 0.110(10) 0.091(9) 0.088(9) -0.008(7) 0.038(8) 0.022(8) 
O61 0.093(4) 0.082(5) 0.083(4) -0.004(4) 0.011(3) 0.007(4) 
O62 0.092(5) 0.082(5) 0.083(4) -0.004(4) 0.011(3) 0.007(4) 
O63 0.092(5) 0.082(5) 0.083(4) -0.004(4) 0.011(3) 0.007(4) 
O64 0.092(4) 0.082(5) 0.083(4) -0.004(4) 0.012(3) 0.007(4) 
O65 0.072(12) 0.082(12) 0.048(11) -0.009(9) 0.016(9) 0.002(9) 
O66 0.031(9) 0.048(10) 0.062(10) -0.022(8) 0.018(8) 0.005(8) 
O67 0.096(12) 0.097(12) 0.108(12) 0.009(9) 0.025(9) -0.010(9) 
O68 0.094(11) 0.081(11) 0.108(11) 0.000(8) 0.018(8) 0.004(8) 
O69 0.074(3) 0.120(4) 0.095(4) -0.011(3) 0.017(3) -0.007(3) 
O70 0.074(3) 0.120(4) 0.095(4) -0.011(3) 0.017(3) -0.007(3) 
O71 0.074(3) 0.120(4) 0.095(4) -0.011(3) 0.017(3) -0.007(3) 
O72 0.074(3) 0.120(4) 0.095(4) -0.011(3) 0.017(3) -0.007(3) 
O73 0.037(6) 0.022(6) 0.031(6) 0.011(5) 0.006(5) 0.004(5) 
O74 0.064(9) 0.049(9) 0.048(8) -0.007(7) 0.013(7) -0.005(7) 
O75 0.161(14) 0.153(14) 0.176(14) -0.004(9) 0.037(10) 0.000(9) 
O76 0.036(7) 0.033(7) 0.058(8) 0.006(6) 0.019(6) 0.018(6) 
O77 0.085(9) 0.098(10) 0.089(9) 0.006(8) 0.007(7) -0.013(8) 
O78 0.071(11) 0.038(9) 0.140(16) -0.022(9) 0.072(11) -0.014(8) 
O79 0.121(11) 0.119(11) 0.128(11) -0.003(9) 0.041(9) -0.033(8) 
O80 0.127(10) 0.104(10) 0.086(9) -0.020(8) 0.011(8) 0.020(8) 
N1 0.045(8) 0.010(6) 0.030(7) -0.001(5) 0.024(6) -0.003(6) 
N2 0.034(8) 0.026(8) 0.020(7) 0.005(6) 0.005(6) 0.012(6) 
N3 0.040(8) 0.026(8) 0.012(6) -0.005(5) 0.007(6) 0.002(6) 
N4 0.054(9) 0.016(7) 0.028(7) 0.003(6) 0.025(7) 0.016(6) 
N5 0.045(8) 0.019(7) 0.011(6) 0.007(5) 0.000(6) 0.013(6) 
N6 0.018(6) 0.039(7) 0.027(6) -0.007(5) 0.002(5) 0.007(5) 
N7 0.019(7) 0.043(9) 0.014(6) 0.002(6) -0.009(5) -0.003(6) 
N8 0.044(8) 0.022(7) 0.011(6) 0.004(5) 0.009(6) 0.008(6) 
N9 0.047(9) 0.018(7) 0.027(7) -0.003(6) 0.006(6) 0.009(6) 
N10 0.031(8) 0.033(8) 0.031(8) 0.006(6) 0.003(6) 0.006(6) 
N11 0.052(9) 0.020(8) 0.050(10) 0.010(7) 0.036(8) 0.006(7) 
N12 0.022(7) 0.022(7) 0.027(7) -0.003(6) 0.007(6) -0.010(5) 
N13 0.037(8) 0.023(7) 0.015(6) 0.001(5) 0.002(6) -0.005(6) 
N14 0.055(10) 0.026(8) 0.027(7) 0.009(6) 0.025(7) 0.003(7) 
N15 0.040(8) 0.036(9) 0.027(7) 0.003(6) 0.008(6) -0.005(7) 
N16 0.035(9) 0.058(11) 0.018(7) -0.016(7) 0.002(6) 0.005(8) 
N17 0.030(8) 0.025(8) 0.044(9) 0.028(7) 0.010(7) -0.005(6) 
N18 0.028(7) 0.014(7) 0.040(8) 0.004(6) 0.012(6) -0.007(6) 
N19 0.027(6) 0.018(6) 0.022(6) 0.009(5) 0.004(5) 0.009(5) 
N20 0.037(8) 0.048(10) 0.020(7) 0.013(7) 0.007(6) 0.013(7) 
N21 0.015(6) 0.021(7) 0.037(8) -0.002(6) 0.003(6) -0.006(5) 
N22 0.039(8) 0.033(8) 0.031(8) 0.003(6) 0.019(7) 0.010(7) 
N23 0.031(8) 0.024(8) 0.043(9) -0.004(6) 0.017(7) 0.013(6) 
N24 0.034(8) 0.035(8) 0.020(7) -0.008(6) 0.003(6) 0.005(6) 
N25 0.015(7) 0.033(8) 0.036(8) 0.000(6) 0.007(6) 0.003(6) 
N26 0.027(6) 0.019(6) 0.039(6) 0.003(5) 0.007(5) 0.003(5) 
N27 0.030(8) 0.021(7) 0.035(8) 0.004(6) 0.005(6) 0.005(6) 
N28 0.024(7) 0.011(7) 0.038(8) 0.001(6) 0.010(6) -0.001(5) 
N29 0.011(6) 0.017(7) 0.050(9) -0.012(6) -0.002(6) -0.002(5) 
N30 0.019(7) 0.022(8) 0.079(12) -0.010(7) 0.034(8) -0.005(6) 
N31 0.031(8) 0.013(7) 0.051(9) -0.003(6) 0.003(7) 0.007(6) 
N32 0.031(8) 0.027(9) 0.063(11) 0.019(8) -0.001(8) -0.001(7) 
N33 0.031(8) 0.015(7) 0.066(11) -0.001(7) -0.001(8) 0.003(6) 
N34 0.031(8) 0.028(8) 0.031(8) -0.011(6) 0.002(6) -0.007(6) 
N35 0.071(12) 0.039(10) 0.036(9) -0.012(7) 0.003(8) -0.022(9) 
N36 0.036(9) 0.045(10) 0.039(9) -0.017(8) -0.002(7) -0.004(7) 
N37 0.034(8) 0.018(7) 0.031(8) -0.002(6) -0.009(6) -0.004(6) 
N38 0.061(11) 0.031(8) 0.016(7) -0.013(6) 0.020(7) 0.006(7) 
N39 0.111(16) 0.009(7) 0.038(9) -0.006(7) 0.022(10) 0.001(8) 
N40 0.044(9) 0.030(9) 0.047(9) -0.028(7) -0.006(7) -0.017(7) 
N41 0.062(10) 0.020(7) 0.015(7) -0.004(5) 0.016(7) 0.004(7) 
N42 0.041(7) 0.031(7) 0.027(6) -0.011(5) 0.009(5) -0.003(6) 
N43 0.075(12) 0.033(9) 0.040(9) -0.010(7) 0.027(9) -0.013(8) 
N44 0.058(10) 0.028(8) 0.016(7) 0.001(6) 0.009(7) 0.001(7) 
N45 0.024(7) 0.027(8) 0.037(8) 0.005(6) -0.001(6) -0.007(6) 
N46 0.024(6) 0.018(6) 0.018(5) 0.004(5) 0.003(5) -0.001(5) 
N47 0.026(7) 0.019(7) 0.029(7) -0.014(6) 0.013(6) -0.005(5) 
N48 0.053(10) 0.037(9) 0.034(8) -0.001(7) 0.003(8) 0.001(8) 
C1 0.032(7) 0.034(7) 0.005(5) -0.008(5) 0.002(5) 0.001(6) 
C2 0.048(8) 0.018(7) 0.023(7) -0.007(6) 0.010(6) -0.009(6) 
C3 0.033(7) 0.010(6) 0.025(7) 0.008(5) 0.013(6) 0.000(5) 
C4 0.064(13) 0.020(9) 0.053(13) 0.005(8) 0.045(12) 0.004(9) 
C5 0.033(7) 0.029(7) 0.011(6) 0.000(5) 0.009(5) -0.015(6) 
C6 0.028(8) 0.010(7) 0.026(8) 0.003(6) 0.005(7) -0.004(6) 
C7 0.027(8) 0.030(9) 0.017(8) 0.008(7) -0.011(6) -0.006(7) 
C8 0.052(8) 0.038(8) 0.044(8) 0.015(7) 0.020(7) -0.009(7) 
C9 0.038(10) 0.033(10) 0.024(8) 0.006(7) 0.012(7) 0.021(8) 
C10 0.055(12) 0.009(8) 0.038(10) 0.006(7) 0.014(9) 0.011(7) 
C11 0.022(8) 0.031(9) 0.020(8) -0.009(7) 0.010(6) -0.002(7) 
C12 0.016(8) 0.037(10) 0.042(10) -0.033(8) 0.016(7) -0.006(7) 
C13 0.007(7) 0.029(9) 0.029(8) -0.015(7) -0.002(6) -0.002(6) 
C14 0.015(8) 0.031(10) 0.033(9) 0.004(8) 0.000(7) -0.001(7) 
C15 0.026(7) 0.033(7) 0.046(8) 0.003(6) 0.031(6) 0.008(6) 
C16 0.029(9) 0.032(10) 0.033(9) -0.015(8) 0.010(7) 0.009(7) 
C17 0.028(9) 0.015(8) 0.053(11) 0.004(8) 0.009(8) 0.002(7) 
C18 0.036(8) 0.047(8) 0.030(7) -0.020(6) 0.014(6) 0.004(6) 
C19 0.054(12) 0.019(9) 0.034(10) 0.002(7) 0.023(9) 0.010(8) 
C20 0.063(13) 0.021(9) 0.029(9) 0.007(7) 0.022(9) 0.004(9) 
C21 0.038(7) 0.035(7) 0.021(6) -0.014(6) 0.015(6) -0.001(6) 
C22 0.047(8) 0.029(7) 0.027(7) 0.002(6) 0.025(6) 0.011(6) 
C23 0.046(11) 0.028(10) 0.028(9) 0.012(7) 0.008(8) -0.002(8) 
C24 0.057(12) 0.045(12) 0.015(8) -0.009(8) 0.005(8) -0.003(9) 
C25 0.062(12) 0.015(8) 0.019(8) 0.009(7) -0.004(8) 0.001(8) 
C26 0.052(11) 0.025(9) 0.009(7) 0.010(6) -0.006(7) 0.006(8) 
C27 0.064(12) 0.019(9) 0.018(8) -0.013(7) -0.011(8) 0.017(8) 
C28 0.040(10) 0.019(8) 0.022(8) 0.000(7) -0.013(7) 0.006(7) 
C29 0.015(8) 0.036(10) 0.039(10) 0.000(8) -0.001(7) 0.011(7) 
C30 0.044(11) 0.032(11) 0.045(11) 0.019(9) -0.003(9) -0.026(9) 
C31 0.019(6) 0.012(6) 0.037(7) -0.006(5) 0.017(6) 0.001(5) 
C32 0.035(10) 0.018(9) 0.040(10) -0.015(7) 0.007(8) -0.009(7) 
C33 0.026(9) 0.016(8) 0.045(10) -0.018(7) 0.000(8) 0.010(7) 
C34 0.019(8) 0.024(9) 0.019(8) 0.006(6) -0.003(6) 0.003(6) 
C35 0.048(10) 0.021(9) 0.021(8) -0.002(7) 0.015(7) 0.007(8) 
C36 0.025(8) 0.010(7) 0.035(9) 0.001(7) -0.001(7) -0.003(6) 
C37 0.028(9) 0.030(10) 0.048(11) -0.008(8) 0.027(8) -0.001(7) 
C38 0.035(9) 0.012(8) 0.045(10) 0.004(7) 0.019(8) -0.004(7) 
C39 0.025(9) 0.020(9) 0.046(10) 0.005(8) 0.009(8) -0.004(7) 
C40 0.062(13) 0.011(8) 0.035(10) 0.000(7) -0.006(9) -0.017(8) 
C41 0.028(7) 0.034(7) 0.036(7) 0.010(6) 0.014(6) -0.002(6) 
C42 0.078(16) 0.021(10) 0.074(15) -0.014(10) 0.037(13) -0.038(11) 
C43 0.022(9) 0.030(9) 0.025(8) 0.007(7) 0.006(7) -0.001(7) 
C44 0.021(7) 0.046(8) 0.048(8) 0.010(7) 0.010(6) -0.011(6) 
C45 0.025(9) 0.013(9) 0.078(14) -0.004(9) 0.009(9) 0.000(7) 
C46 0.026(7) 0.050(9) 0.055(9) -0.010(7) -0.003(7) -0.012(7) 
C47 0.038(10) 0.022(9) 0.030(9) -0.013(7) 0.002(8) -0.010(7) 
C48 0.037(11) 0.029(11) 0.094(18) -0.003(11) 0.009(11) -0.020(9) 
C49 0.034(10) 0.019(9) 0.026(9) 0.004(7) -0.004(7) -0.008(7) 
C50 0.038(10) 0.024(9) 0.036(9) -0.006(8) 0.000(8) 0.007(8) 
C51 0.004(7) 0.044(11) 0.059(12) 0.024(9) 0.002(7) -0.001(7) 
C52 0.063(10) 0.057(10) 0.075(10) 0.013(8) 0.000(8) 0.004(8) 
C53 0.057(8) 0.028(7) 0.034(7) -0.010(6) 0.004(7) -0.005(7) 
C54 0.045(12) 0.072(16) 0.034(11) 0.001(10) -0.004(9) 0.017(11) 
C55 0.12(2) 0.024(11) 0.035(11) 0.004(8) 0.026(12) -0.019(12) 
C56 0.049(12) 0.029(10) 0.077(15) -0.030(10) 0.042(11) -0.017(9) 
C57 0.070(14) 0.033(11) 0.029(10) -0.018(8) 0.005(9) 0.012(10) 
C58 0.074(16) 0.029(11) 0.038(11) 0.007(9) 0.005(11) -0.010(10) 
C59 0.050(12) 0.014(8) 0.036(10) -0.006(7) 0.003(9) -0.023(8) 
C60 0.032(10) 0.037(11) 0.054(12) -0.027(9) 0.018(9) -0.018(8) 
C61 0.032(9) 0.034(11) 0.034(10) -0.003(8) 0.006(8) -0.007(8) 
C62 0.044(10) 0.026(9) 0.036(10) -0.014(7) 0.030(8) -0.018(8) 
C63 0.073(14) 0.036(11) 0.027(9) 0.001(8) 0.029(9) 0.030(10) 
C64 0.042(8) 0.026(7) 0.018(6) -0.011(6) 0.003(6) 0.000(6) 
C65 0.048(11) 0.033(10) 0.024(9) -0.003(7) 0.021(8) 0.000(8) 
C66 0.068(13) 0.035(11) 0.021(9) -0.009(8) 0.025(9) 0.001(9) 
C67 0.029(8) 0.030(9) 0.013(7) 0.013(6) 0.007(6) 0.008(7) 
C68 0.029(9) 0.029(10) 0.039(10) 0.003(8) 0.012(8) -0.001(7) 
C69 0.033(5) 0.023(5) 0.030(5) -0.001(4) 0.008(4) -0.009(4) 
C70 0.031(9) 0.024(9) 0.041(10) 0.000(7) 0.019(8) -0.001(7) 
C71 0.017(3) 0.017(3) 0.017(3) -0.0004(10) 0.0043(12) -0.0002(10) 
C72 0.027(7) 0.029(7) 0.038(7) 0.008(6) 0.020(6) -0.006(6) 
 
_geom_special_details 
; 
 All esds (except the esd in the dihedral angle between two l.s. planes) 
 are estimated using the full covariance matrix.  The cell esds are taken 
 into account individually in the estimation of esds in distances, angles 
 and torsion angles; correlations between esds in cell parameters are only 
 used when they are defined by crystal symmetry.  An approximate (isotropic) 
 treatment of cell esds is used for estimating esds involving l.s. planes. 
;
loop_ 
 _geom_bond_atom_site_label_1 
 _geom_bond_atom_site_label_2 
 _geom_bond_distance 
 _geom_bond_site_symmetry_2 
 _geom_bond_publ_flag 
Ce1 O3 2.401(15) . ? 
Ce1 O13 2.491(15) . ? 
Ce1 O33 2.496(15) . ? 
Ce1 O35 2.536(16) . ? 
Ce1 O34 2.548(17) . ? 
Ce1 O15 2.551(16) . ? 
Ce1 O25 2.571(16) . ? 
Ce1 O1 2.587(15) . ? 
Ce1 O5 2.667(16) . ? 
Ce2 O2 2.430(15) . ? 
Ce2 O38 2.491(16) . ? 
Ce2 O39 2.504(16) . ? 
Ce2 O36 2.507(16) . ? 
Ce2 O40 2.547(15) . ? 
Ce2 O37 2.552(17) . ? 
Ce2 O4 2.619(15) . ? 
Ce2 O26 2.629(16) . ? 
Ce2 O12 2.659(16) . ? 
Ce3 O29 2.453(15) . ? 
Ce3 O24 2.445(17) 4 ? 
Ce3 O9 2.455(14) . ? 
Ce3 O41 2.46(2) . ? 
Ce3 O43 2.514(18) . ? 
Ce3 O44 2.58(3) . ? 
Ce3 O22 2.599(16) 4 ? 
Ce3 O42 2.59(2) . ? 
Ce3 O14 2.748(19) 4 ? 
Re1 O28 1.701(14) . ? 
Re1 O27 1.728(16) . ? 
Re1 O26 1.748(16) . ? 
Re1 O25 1.776(15) . ? 
Re2 O31 1.703(13) . ? 
Re2 O30 1.70(3) . ? 
Re2 O29 1.754(15) . ? 
Re2 O32 1.75(3) . ? 
Re3 O45 1.689(16) . ? 
Re3 O48 1.718(17) . ? 
Re3 O47 1.723(19) . ? 
Re3 O46 1.70(2) . ? 
Re4 O52 1.673(15) . ? 
Re4 O51 1.711(17) . ? 
Re4 O50 1.76(2) . ? 
Re4 O49 1.77(2) . ? 
Re5 O54 1.63(3) . ? 
Re5 O55 1.650(19) . ? 
Re5 O56 1.72(2) . ? 
Re5 O53 1.81(3) . ? 
Re6 O58 1.726(12) . ? 
Re6 O60 1.730(12) . ? 
Re6 O59 1.763(12) . ? 
Re6 O57 1.776(13) . ? 
Re7 O61 1.694(11) . ? 
Re7 O63 1.715(12) . ? 
Re7 O62 1.711(13) . ? 
Re7 O64 1.734(12) . ? 
Re8 O65 1.696(13) . ? 
Re8 O66 1.706(13) . ? 
Re8 O68 1.724(13) . ? 
Re8 O67 1.729(13) . ? 
Re9 O69 1.730(12) . ? 
Re9 O70 1.747(13) . ? 
Re9 O72 1.75(3) . ? 
Re9 O71 1.76(3) . ? 
O1 C1 1.27(2) . ? 
O2 C4 1.27(3) . ? 
O3 C7 1.22(2) . ? 
O4 C10 1.26(2) . ? 
O5 C13 1.26(2) . ? 
O6 C16 1.25(2) . ? 
O7 C19 1.26(2) . ? 
O8 C22 1.23(3) . ? 
O9 C25 1.22(2) . ? 
O10 C28 1.24(2) . ? 
O11 C31 1.20(2) . ? 
O12 C34 1.24(2) . ? 
O13 C37 1.21(2) . ? 
O14 C40 1.23(2) . ? 
O14 Ce3 2.748(19) 4_454 ? 
O15 C43 1.23(2) . ? 
O16 C46 1.27(3) . ? 
O17 C49 1.27(2) . ? 
O18 C52 1.31(3) . ? 
O19 C55 1.26(3) . ? 
O20 C58 1.21(3) . ? 
O21 C61 1.25(2) . ? 
O22 C64 1.25(2) . ? 
O22 Ce3 2.599(16) 4_454 ? 
O23 C67 1.24(2) . ? 
O24 C70 1.31(2) . ? 
O24 Ce3 2.446(17) 4_454 ? 
N1 C1 1.33(2) . ? 
N1 C35 1.45(2) . ? 
N1 C3 1.460(19) . ? 
N2 C1 1.34(3) . ? 
N2 C2 1.38(3) . ? 
N2 C5 1.46(3) . ? 
N3 C4 1.27(3) . ? 
N3 C6 1.44(3) . ? 
N3 C2 1.49(3) . ? 
N4 C4 1.39(3) . ? 
N4 C3 1.43(3) . ? 
N4 C36 1.46(3) . ? 
N5 C7 1.34(3) . ? 
N5 C5 1.45(3) . ? 
N5 C9 1.49(3) . ? 
N6 C8 1.39(3) . ? 
N6 C7 1.41(3) . ? 
N6 C11 1.44(3) . ? 
N7 C10 1.37(3) . ? 
N7 C12 1.40(3) . ? 
N7 C8 1.53(3) . ? 
N8 C10 1.34(3) . ? 
N8 C9 1.42(3) . ? 
N8 C6 1.43(3) . ? 
N9 C13 1.38(3) . ? 
N9 C11 1.42(3) . ? 
N9 C15 1.46(3) . ? 
N10 C13 1.37(3) . ? 
N10 C17 1.44(3) . ? 
N10 C14 1.47(3) . ? 
N11 C14 1.33(3) . ? 
N11 C16 1.37(3) . ? 
N11 C18 1.54(3) . ? 
N12 C16 1.32(3) . ? 
N12 C15 1.42(3) . ? 
N12 C12 1.46(3) . ? 
N13 C19 1.35(3) . ? 
N13 C17 1.38(3) . ? 
N13 C21 1.46(3) . ? 
N14 C23 1.39(3) . ? 
N14 C19 1.40(3) . ? 
N14 C20 1.52(3) . ? 
N15 C20 1.40(3) . ? 
N15 C22 1.44(3) . ? 
N15 C24 1.48(3) . ? 
N16 C22 1.34(3) . ? 
N16 C18 1.37(3) . ? 
N16 C21 1.45(3) . ? 
N17 C25 1.35(3) . ? 
N17 C27 1.47(3) . ? 
N17 C23 1.48(3) . ? 
N18 C25 1.39(3) . ? 
N18 C26 1.43(3) . ? 
N18 C29 1.48(3) . ? 
N19 C28 1.41(3) . ? 
N19 C30 1.45(3) . ? 
N19 C26 1.46(3) . ? 
N20 C24 1.37(3) . ? 
N20 C28 1.38(3) . ? 
N20 C27 1.47(3) . ? 
N21 C31 1.36(3) . ? 
N21 C33 1.44(3) . ? 
N21 C29 1.51(3) . ? 
N22 C35 1.42(3) . ? 
N22 C31 1.41(3) . ? 
N22 C32 1.44(3) . ? 
N23 C34 1.34(3) . ? 
N23 C36 1.43(3) . ? 
N23 C32 1.47(3) . ? 
N24 C34 1.41(3) . ? 
N24 C30 1.44(3) . ? 
N24 C33 1.47(3) . ? 
N25 C37 1.34(3) . ? 
N25 C39 1.46(3) . ? 
N25 C71 1.53(3) . ? 
N26 C38 1.40(3) . ? 
N26 C37 1.41(3) . ? 
N26 C41 1.46(3) . ? 
N27 C42 1.37(4) . ? 
N27 C38 1.39(3) . ? 
N27 C40 1.44(3) . ? 
N28 C40 1.33(3) . ? 
N28 C39 1.39(3) . ? 
N28 C72 1.50(3) . ? 
N29 C43 1.36(3) . ? 
N29 C41 1.46(3) . ? 
N29 C45 1.51(3) . ? 
N30 C43 1.37(3) . ? 
N30 C47 1.40(3) . ? 
N30 C44 1.50(3) . ? 
N31 C44 1.37(3) . ? 
N31 C48 1.48(3) . ? 
N31 C46 1.46(3) . ? 
N32 C46 1.22(3) . ? 
N32 C42 1.42(4) . ? 
N32 C45 1.51(3) . ? 
N33 C49 1.31(3) . ? 
N33 C47 1.44(3) . ? 
N33 C51 1.53(3) . ? 
N34 C49 1.34(3) . ? 
N34 C50 1.46(3) . ? 
N34 C53 1.47(3) . ? 
N35 C52 1.35(4) . ? 
N35 C54 1.39(4) . ? 
N35 C50 1.45(3) . ? 
N36 C52 1.32(4) . ? 
N36 C51 1.42(3) . ? 
N36 C48 1.49(4) . ? 
N37 C55 1.37(4) . ? 
N37 C53 1.39(3) . ? 
N37 C57 1.48(3) . ? 
N38 C55 1.33(3) . ? 
N38 C59 1.38(3) . ? 
N38 C56 1.43(3) . ? 
N39 C60 1.38(3) . ? 
N39 C58 1.39(4) . ? 
N39 C56 1.46(3) . ? 
N40 C58 1.36(3) . ? 
N40 C57 1.41(4) . ? 
N40 C54 1.56(4) . ? 
N41 C61 1.35(3) . ? 
N41 C63 1.42(3) . ? 
N41 C59 1.47(3) . ? 
N42 C61 1.36(3) . ? 
N42 C62 1.42(3) . ? 
N42 C65 1.50(3) . ? 
N43 C64 1.34(3) . ? 
N43 C66 1.41(3) . ? 
N43 C62 1.48(3) . ? 
N44 C64 1.32(3) . ? 
N44 C63 1.40(4) . ? 
N44 C60 1.49(3) . ? 
N45 C67 1.36(3) . ? 
N45 C69 1.44(3) . ? 
N45 C65 1.45(3) . ? 
N46 C67 1.35(3) . ? 
N46 C68 1.43(3) . ? 
N46 C71 1.48(2) . ? 
N47 C70 1.29(3) . ? 
N47 C72 1.36(3) . ? 
N47 C68 1.52(3) . ? 
N48 C70 1.32(3) . ? 
N48 C69 1.42(3) . ? 
N48 C66 1.49(3) . ? 
C2 C3 1.59(3) . ? 
C2 H2 0.9800 . ? 
C3 H3 0.9800 . ? 
C5 H5A 0.9700 . ? 
C5 H5B 0.9700 . ? 
C6 H6A 0.9700 . ? 
C6 H6B 0.9700 . ? 
C8 C9 1.50(3) . ? 
C8 H8 0.9800 . ? 
C9 H9 0.9800 . ? 
C11 H11A 0.9700 . ? 
C11 H11B 0.9700 . ? 
C12 H12A 0.9700 . ? 
C12 H12B 0.9700 . ? 
C14 C15 1.50(3) . ? 
C14 H14 0.9800 . ? 
C15 H15 0.9800 . ? 
C17 H17A 0.9700 . ? 
C17 H17B 0.9700 . ? 
C18 H18A 0.9700 . ? 
C18 H18B 0.9700 . ? 
C20 C21 1.54(4) . ? 
C20 H20 0.9800 . ? 
C21 H21 0.9800 . ? 
C23 H23A 0.9700 . ? 
C23 H23B 0.9700 . ? 
C24 H24A 0.9700 . ? 
C24 H24B 0.9700 . ? 
C26 C27 1.42(4) . ? 
C26 H26 0.9800 . ? 
C27 H27 0.9800 . ? 
C29 H29A 0.9700 . ? 
C29 H29B 0.9700 . ? 
C30 H30A 0.9700 . ? 
C30 H30B 0.9700 . ? 
C32 C33 1.56(3) . ? 
C32 H32 0.9800 . ? 
C33 H33 0.9800 . ? 
C35 H35A 0.9700 . ? 
C35 H35B 0.9700 . ? 
C36 H36A 0.9700 . ? 
C36 H36B 0.9700 . ? 
C38 C39 1.56(3) . ? 
C38 H38 0.9800 . ? 
C39 H39 0.9800 . ? 
C41 H41A 0.9700 . ? 
C41 H41B 0.9700 . ? 
C42 H42A 0.9700 . ? 
C42 H42B 0.9700 . ? 
C44 C45 1.48(4) . ? 
C44 H44 0.9800 . ? 
C45 H45 0.9800 . ? 
C47 H47A 0.9700 . ? 
C47 H47B 0.9700 . ? 
C48 H48A 0.9700 . ? 
C48 H48B 0.9700 . ? 
C50 C51 1.42(3) . ? 
C50 H50 0.9800 . ? 
C51 H51 0.9800 . ? 
C53 H53A 0.9700 . ? 
C53 H53B 0.9700 . ? 
C54 H54A 0.9700 . ? 
C54 H54B 0.9700 . ? 
C56 C57 1.56(4) . ? 
C56 H56 0.9800 . ? 
C57 H57 0.9800 . ? 
C59 H59A 0.9700 . ? 
C59 H59B 0.9700 . ? 
C60 H60A 0.9700 . ? 
C60 H60B 0.9700 . ? 
C62 C63 1.57(4) . ? 
C62 H62 0.9800 . ? 
C63 H63 0.9800 . ? 
C65 H65A 0.9700 . ? 
C65 H65B 0.9700 . ? 
C66 H66A 0.9700 . ? 
C66 H66B 0.9700 . ? 
C68 C69 1.56(3) . ? 
C68 H68 0.9800 . ? 
C69 H69 0.9800 . ? 
C71 H71A 0.9700 . ? 
C71 H71B 0.9700 . ? 
C72 H72A 0.9700 . ? 
C72 H72B 0.9700 . ? 
 
loop_ 
 _geom_angle_atom_site_label_1 
 _geom_angle_atom_site_label_2 
 _geom_angle_atom_site_label_3 
 _geom_angle 
 _geom_angle_site_symmetry_1 
 _geom_angle_site_symmetry_3 
 _geom_angle_publ_flag 
O3 Ce1 O13 137.2(5) . . ? 
O3 Ce1 O33 73.2(5) . . ? 
O13 Ce1 O33 79.0(6) . . ? 
O3 Ce1 O35 145.8(5) . . ? 
O13 Ce1 O35 71.3(5) . . ? 
O33 Ce1 O35 140.1(6) . . ? 
O3 Ce1 O34 130.4(5) . . ? 
O13 Ce1 O34 66.0(5) . . ? 
O33 Ce1 O34 71.3(5) . . ? 
O35 Ce1 O34 72.5(5) . . ? 
O3 Ce1 O15 68.3(5) . . ? 
O13 Ce1 O15 71.6(5) . . ? 
O33 Ce1 O15 68.7(5) . . ? 
O35 Ce1 O15 123.2(5) . . ? 
O34 Ce1 O15 125.7(5) . . ? 
O3 Ce1 O25 75.3(5) . . ? 
O13 Ce1 O25 143.0(5) . . ? 
O33 Ce1 O25 136.5(5) . . ? 
O35 Ce1 O25 72.5(5) . . ? 
O34 Ce1 O25 109.8(5) . . ? 
O15 Ce1 O25 124.4(5) . . ? 
O3 Ce1 O1 74.5(5) . . ? 
O13 Ce1 O1 130.9(5) . . ? 
O33 Ce1 O1 78.8(5) . . ? 
O35 Ce1 O1 100.8(5) . . ? 
O34 Ce1 O1 65.5(5) . . ? 
O15 Ce1 O1 135.9(5) . . ? 
O25 Ce1 O1 64.3(5) . . ? 
O3 Ce1 O5 81.9(5) . . ? 
O13 Ce1 O5 94.8(5) . . ? 
O33 Ce1 O5 133.5(5) . . ? 
O35 Ce1 O5 76.3(5) . . ? 
O34 Ce1 O5 147.2(5) . . ? 
O15 Ce1 O5 65.7(5) . . ? 
O25 Ce1 O5 68.9(5) . . ? 
O1 Ce1 O5 131.4(5) . . ? 
O2 Ce2 O38 145.0(5) . . ? 
O2 Ce2 O39 135.5(5) . . ? 
O38 Ce2 O39 71.1(5) . . ? 
O2 Ce2 O36 72.5(5) . . ? 
O38 Ce2 O36 139.6(5) . . ? 
O39 Ce2 O36 88.5(5) . . ? 
O2 Ce2 O40 130.2(5) . . ? 
O38 Ce2 O40 69.6(5) . . ? 
O39 Ce2 O40 76.4(5) . . ? 
O36 Ce2 O40 71.9(5) . . ? 
O2 Ce2 O37 68.7(5) . . ? 
O38 Ce2 O37 126.2(6) . . ? 
O39 Ce2 O37 67.2(5) . . ? 
O36 Ce2 O37 71.2(6) . . ? 
O40 Ce2 O37 127.9(5) . . ? 
O2 Ce2 O4 84.8(5) . . ? 
O38 Ce2 O4 74.6(5) . . ? 
O39 Ce2 O4 84.7(5) . . ? 
O36 Ce2 O4 139.4(5) . . ? 
O40 Ce2 O4 143.3(5) . . ? 
O37 Ce2 O4 69.2(5) . . ? 
O2 Ce2 O26 73.4(5) . . ? 
O38 Ce2 O26 72.8(5) . . ? 
O39 Ce2 O26 139.5(5) . . ? 
O36 Ce2 O26 131.6(5) . . ? 
O40 Ce2 O26 107.5(5) . . ? 
O37 Ce2 O26 124.5(5) . . ? 
O4 Ce2 O26 68.3(5) . . ? 
O2 Ce2 O12 70.2(5) . . ? 
O38 Ce2 O12 104.4(5) . . ? 
O39 Ce2 O12 140.0(5) . . ? 
O36 Ce2 O12 69.4(5) . . ? 
O40 Ce2 O12 65.4(5) . . ? 
O37 Ce2 O12 129.4(5) . . ? 
O4 Ce2 O12 133.6(5) . . ? 
O26 Ce2 O12 67.4(5) . . ? 
O29 Ce3 O24 76.8(6) . 4 ? 
O29 Ce3 O9 136.9(5) . . ? 
O24 Ce3 O9 71.6(5) 4 . ? 
O29 Ce3 O41 73.9(6) . . ? 
O24 Ce3 O41 148.0(6) 4 . ? 
O9 Ce3 O41 140.2(6) . . ? 
O29 Ce3 O43 133.0(7) . . ? 
O24 Ce3 O43 81.3(8) 4 . ? 
O9 Ce3 O43 70.1(6) . . ? 
O41 Ce3 O43 109.9(8) . . ? 
O29 Ce3 O44 103.3(8) . . ? 
O24 Ce3 O44 129.2(7) 4 . ? 
O9 Ce3 O44 76.4(7) . . ? 
O41 Ce3 O44 70.9(8) . . ? 
O43 Ce3 O44 122.6(9) . . ? 
O29 Ce3 O22 70.6(6) . 4 ? 
O24 Ce3 O22 83.8(6) 4 4 ? 
O9 Ce3 O22 132.2(5) . 4 ? 
O41 Ce3 O22 74.5(7) . 4 ? 
O43 Ce3 O22 66.0(6) . 4 ? 
O44 Ce3 O22 145.2(7) . 4 ? 
O29 Ce3 O42 141.3(6) . . ? 
O24 Ce3 O42 139.7(6) 4 . ? 
O9 Ce3 O42 79.1(6) . . ? 
O41 Ce3 O42 67.5(7) . . ? 
O43 Ce3 O42 62.7(8) . . ? 
O44 Ce3 O42 66.3(8) . . ? 
O22 Ce3 O42 96.5(6) 4 . ? 
O29 Ce3 O14 67.7(5) . 4 ? 
O24 Ce3 O14 72.5(6) 4 4 ? 
O9 Ce3 O14 75.2(5) . 4 ? 
O41 Ce3 O14 107.2(7) . 4 ? 
O43 Ce3 O14 141.6(7) . 4 ? 
O44 Ce3 O14 61.7(7) . 4 ? 
O22 Ce3 O14 135.6(5) 4 4 ? 
O42 Ce3 O14 125.8(6) . 4 ? 
O28 Re1 O27 108.6(8) . . ? 
O28 Re1 O26 111.2(7) . . ? 
O27 Re1 O26 108.5(8) . . ? 
O28 Re1 O25 107.8(8) . . ? 
O27 Re1 O25 109.1(7) . . ? 
O26 Re1 O25 111.6(7) . . ? 
O31 Re2 O30 107.6(14) . . ? 
O31 Re2 O29 109.5(10) . . ? 
O30 Re2 O29 112.7(11) . . ? 
O31 Re2 O32 111.8(15) . . ? 
O30 Re2 O32 109.3(16) . . ? 
O29 Re2 O32 106.2(12) . . ? 
O45 Re3 O48 113.9(9) . . ? 
O45 Re3 O47 110.2(10) . . ? 
O48 Re3 O47 106.0(9) . . ? 
O45 Re3 O46 107.9(12) . . ? 
O48 Re3 O46 109.5(9) . . ? 
O47 Re3 O46 109.3(12) . . ? 
O52 Re4 O51 110.3(8) . . ? 
O52 Re4 O50 110.4(12) . . ? 
O51 Re4 O50 106.7(9) . . ? 
O52 Re4 O49 109.8(10) . . ? 
O51 Re4 O49 108.7(9) . . ? 
O50 Re4 O49 110.8(11) . . ? 
O54 Re5 O55 113.4(13) . . ? 
O54 Re5 O56 111.3(14) . . ? 
O55 Re5 O56 111.3(10) . . ? 
O54 Re5 O53 105.8(17) . . ? 
O55 Re5 O53 107.2(15) . . ? 
O56 Re5 O53 107.4(12) . . ? 
O58 Re6 O60 112.2(10) . . ? 
O58 Re6 O59 110.4(10) . . ? 
O60 Re6 O59 109.7(9) . . ? 
O58 Re6 O57 109.3(10) . . ? 
O60 Re6 O57 108.7(9) . . ? 
O59 Re6 O57 106.4(9) . . ? 
O61 Re7 O63 110.4(8) . . ? 
O61 Re7 O62 111.5(10) . . ? 
O63 Re7 O62 109.6(9) . . ? 
O61 Re7 O64 109.2(10) . . ? 
O63 Re7 O64 107.9(10) . . ? 
O62 Re7 O64 108.2(9) . . ? 
O65 Re8 O66 111.8(10) . . ? 
O65 Re8 O68 110.1(10) . . ? 
O66 Re8 O68 114.5(17) . . ? 
O65 Re8 O67 103(2) . . ? 
O66 Re8 O67 109.1(9) . . ? 
O68 Re8 O67 108.1(9) . . ? 
O69 Re9 O70 110.1(7) . . ? 
O69 Re9 O72 110.0(7) . . ? 
O70 Re9 O72 109.4(19) . . ? 
O69 Re9 O71 109.7(7) . . ? 
O70 Re9 O71 108.9(16) . . ? 
O72 Re9 O71 108.9(15) . . ? 
C1 O1 Ce1 147.0(9) . . ? 
C4 O2 Ce2 134.2(11) . . ? 
C7 O3 Ce1 133.7(10) . . ? 
C10 O4 Ce2 146.2(11) . . ? 
C13 O5 Ce1 147.7(10) . . ? 
C25 O9 Ce3 139.3(10) . . ? 
C34 O12 Ce2 139.3(10) . . ? 
C37 O13 Ce1 160.9(12) . . ? 
C40 O14 Ce3 139.7(11) . 4_454 ? 
C43 O15 Ce1 160.6(11) . . ? 
C64 O22 Ce3 148.0(11) . 4_454 ? 
C70 O24 Ce3 129.9(11) . 4_454 ? 
Re1 O25 Ce1 146.6(7) . . ? 
Re1 O26 Ce2 144.0(7) . . ? 
Re2 O29 Ce3 145.6(9) . . ? 
C1 N1 C35 122.1(14) . . ? 
C1 N1 C3 113.2(13) . . ? 
C35 N1 C3 122.2(13) . . ? 
C1 N2 C2 114(2) . . ? 
C1 N2 C5 124.0(19) . . ? 
C2 N2 C5 122.1(18) . . ? 
C4 N3 C6 122.1(18) . . ? 
C4 N3 C2 114.3(19) . . ? 
C6 N3 C2 123.5(17) . . ? 
C4 N4 C3 110(2) . . ? 
C4 N4 C36 123(2) . . ? 
C3 N4 C36 126.9(17) . . ? 
C7 N5 C5 118.0(18) . . ? 
C7 N5 C9 113.3(19) . . ? 
C5 N5 C9 128.4(18) . . ? 
C8 N6 C7 111.7(19) . . ? 
C8 N6 C11 130.3(18) . . ? 
C7 N6 C11 118.0(18) . . ? 
C10 N7 C12 125.4(18) . . ? 
C10 N7 C8 110.1(18) . . ? 
C12 N7 C8 122.0(18) . . ? 
C10 N8 C9 111.9(19) . . ? 
C10 N8 C6 123.0(18) . . ? 
C9 N8 C6 123.8(17) . . ? 
C13 N9 C11 121.1(18) . . ? 
C13 N9 C15 109.4(18) . . ? 
C11 N9 C15 129.5(18) . . ? 
C13 N10 C17 121.3(19) . . ? 
C13 N10 C14 113.1(18) . . ? 
C17 N10 C14 125.4(19) . . ? 
C14 N11 C16 113(2) . . ? 
C14 N11 C18 126.2(19) . . ? 
C16 N11 C18 120(2) . . ? 
C16 N12 C15 108.9(18) . . ? 
C16 N12 C12 122.7(18) . . ? 
C15 N12 C12 128.1(18) . . ? 
C19 N13 C17 121.1(19) . . ? 
C19 N13 C21 109.0(18) . . ? 
C17 N13 C21 128.9(19) . . ? 
C23 N14 C19 125.9(19) . . ? 
C23 N14 C20 127.8(19) . . ? 
C19 N14 C20 106.0(18) . . ? 
C20 N15 C22 111(2) . . ? 
C20 N15 C24 124(2) . . ? 
C22 N15 C24 124(2) . . ? 
C22 N16 C18 122(2) . . ? 
C22 N16 C21 111.6(19) . . ? 
C18 N16 C21 126.2(19) . . ? 
C25 N17 C27 111.2(19) . . ? 
C25 N17 C23 119(2) . . ? 
C27 N17 C23 130(2) . . ? 
C25 N18 C26 110.5(19) . . ? 
C25 N18 C29 118.9(19) . . ? 
C26 N18 C29 130.5(18) . . ? 
C28 N19 C30 124(2) . . ? 
C28 N19 C26 109.0(18) . . ? 
C30 N19 C26 124(2) . . ? 
C24 N20 C28 123(2) . . ? 
C24 N20 C27 126(2) . . ? 
C28 N20 C27 110(2) . . ? 
C31 N21 C33 113.9(18) . . ? 
C31 N21 C29 119.5(17) . . ? 
C33 N21 C29 125.6(18) . . ? 
C35 N22 C31 123.5(19) . . ? 
C35 N22 C32 125(2) . . ? 
C31 N22 C32 109.2(17) . . ? 
C34 N23 C36 124.0(18) . . ? 
C34 N23 C32 114.4(18) . . ? 
C36 N23 C32 121.3(18) . . ? 
C34 N24 C30 127.3(19) . . ? 
C34 N24 C33 110.8(18) . . ? 
C30 N24 C33 121(2) . . ? 
C37 N25 C39 116.6(17) . . ? 
C37 N25 C71 120.4(18) . . ? 
C39 N25 C71 121.2(17) . . ? 
C38 N26 C37 112.7(18) . . ? 
C38 N26 C41 128.2(18) . . ? 
C37 N26 C41 118.7(18) . . ? 
C42 N27 C38 125(2) . . ? 
C42 N27 C40 125(2) . . ? 
C38 N27 C40 109.1(18) . . ? 
C40 N28 C39 113.1(18) . . ? 
C40 N28 C72 121.6(19) . . ? 
C39 N28 C72 125.1(18) . . ? 
C43 N29 C41 124.4(17) . . ? 
C43 N29 C45 109.8(17) . . ? 
C41 N29 C45 125.6(19) . . ? 
C43 N30 C47 124.1(19) . . ? 
C43 N30 C44 108.6(19) . . ? 
C47 N30 C44 125(2) . . ? 
C44 N31 C48 126(2) . . ? 
C44 N31 C46 110(2) . . ? 
C48 N31 C46 124(2) . . ? 
C46 N32 C42 125(3) . . ? 
C46 N32 C45 110(2) . . ? 
C42 N32 C45 123(2) . . ? 
C49 N33 C47 125(2) . . ? 
C49 N33 C51 109(2) . . ? 
C47 N33 C51 124(2) . . ? 
C49 N34 C50 107.6(19) . . ? 
C49 N34 C53 125.2(18) . . ? 
C50 N34 C53 125.9(18) . . ? 
C52 N35 C54 123(3) . . ? 
C52 N35 C50 107(2) . . ? 
C54 N35 C50 130(2) . . ? 
C52 N36 C51 109(2) . . ? 
C52 N36 C48 122(3) . . ? 
C51 N36 C48 129(2) . . ? 
C55 N37 C53 125(2) . . ? 
C55 N37 C57 109(2) . . ? 
C53 N37 C57 122.5(19) . . ? 
C55 N38 C59 126(2) . . ? 
C55 N38 C56 111(2) . . ? 
C59 N38 C56 123.1(18) . . ? 
C60 N39 C58 127(2) . . ? 
C60 N39 C56 120(2) . . ? 
C58 N39 C56 112(2) . . ? 
C58 N40 C57 113(2) . . ? 
C58 N40 C54 119(2) . . ? 
C57 N40 C54 128(2) . . ? 
C61 N41 C63 112.8(19) . . ? 
C61 N41 C59 118.8(19) . . ? 
C63 N41 C59 126.1(19) . . ? 
C61 N42 C62 113.9(19) . . ? 
C61 N42 C65 123.4(19) . . ? 
C62 N42 C65 122(2) . . ? 
C64 N43 C66 124(2) . . ? 
C64 N43 C62 112(2) . . ? 
C66 N43 C62 123(2) . . ? 
C64 N44 C63 112(2) . . ? 
C64 N44 C60 126(2) . . ? 
C63 N44 C60 119.8(19) . . ? 
C67 N45 C69 113.3(18) . . ? 
C67 N45 C65 125.0(19) . . ? 
C69 N45 C65 120.6(19) . . ? 
C67 N46 C68 112.9(17) . . ? 
C67 N46 C71 119.0(17) . . ? 
C68 N46 C71 121.5(16) . . ? 
C70 N47 C72 125.7(19) . . ? 
C70 N47 C68 107.1(17) . . ? 
C72 N47 C68 126.6(18) . . ? 
C70 N48 C69 112(2) . . ? 
C70 N48 C66 123(2) . . ? 
C69 N48 C66 125(2) . . ? 
O1 C1 N1 126.1(17) . . ? 
O1 C1 N2 124.9(18) . . ? 
N1 C1 N2 108.9(18) . . ? 
N2 C2 N3 118.0(19) . . ? 
N2 C2 C3 103.5(17) . . ? 
N3 C2 C3 99.3(16) . . ? 
N2 C2 H2 111.7 . . ? 
N3 C2 H2 111.7 . . ? 
C3 C2 H2 111.7 . . ? 
N4 C3 N1 114.4(14) . . ? 
N4 C3 C2 104.6(15) . . ? 
N1 C3 C2 99.4(14) . . ? 
N4 C3 H3 112.5 . . ? 
N1 C3 H3 112.5 . . ? 
C2 C3 H3 112.5 . . ? 
N3 C4 O2 130(2) . . ? 
N3 C4 N4 111(2) . . ? 
O2 C4 N4 119(2) . . ? 
N5 C5 N2 114.9(16) . . ? 
N5 C5 H5A 108.5 . . ? 
N2 C5 H5A 108.5 . . ? 
N5 C5 H5B 108.5 . . ? 
N2 C5 H5B 108.5 . . ? 
H5A C5 H5B 107.5 . . ? 
N8 C6 N3 117.0(16) . . ? 
N8 C6 H6A 108.1 . . ? 
N3 C6 H6A 108.0 . . ? 
N8 C6 H6B 108.0 . . ? 
N3 C6 H6B 108.1 . . ? 
H6A C6 H6B 107.3 . . ? 
O3 C7 N5 131(2) . . ? 
O3 C7 N6 122.4(19) . . ? 
N5 C7 N6 106.5(19) . . ? 
N6 C8 N7 114(2) . . ? 
N6 C8 C9 107(2) . . ? 
N7 C8 C9 101(2) . . ? 
N6 C8 H8 111.5 . . ? 
N7 C8 H8 111.5 . . ? 
C9 C8 H8 111.5 . . ? 
N8 C9 N5 114.2(18) . . ? 
N8 C9 C8 107.6(18) . . ? 
N5 C9 C8 101(2) . . ? 
N8 C9 H9 111.1 . . ? 
N5 C9 H9 111.1 . . ? 
C8 C9 H9 111.1 . . ? 
O4 C10 N8 128(2) . . ? 
O4 C10 N7 122(2) . . ? 
N8 C10 N7 110(2) . . ? 
N9 C11 N6 115.6(18) . . ? 
N9 C11 H11A 108.4 . . ? 
N6 C11 H11A 108.4 . . ? 
N9 C11 H11B 108.4 . . ? 
N6 C11 H11B 108.4 . . ? 
H11A C11 H11B 107.4 . . ? 
N7 C12 N12 114.6(18) . . ? 
N7 C12 H12A 108.6 . . ? 
N12 C12 H12A 108.6 . . ? 
N7 C12 H12B 108.6 . . ? 
N12 C12 H12B 108.6 . . ? 
H12A C12 H12B 107.6 . . ? 
O5 C13 N10 126.1(19) . . ? 
O5 C13 N9 126.1(19) . . ? 
N10 C13 N9 107.6(17) . . ? 
N11 C14 C15 103(2) . . ? 
N11 C14 N10 118.8(18) . . ? 
C15 C14 N10 101.9(18) . . ? 
N11 C14 H14 110.8 . . ? 
C15 C14 H14 110.8 . . ? 
N10 C14 H14 110.8 . . ? 
N12 C15 N9 115.5(18) . . ? 
N12 C15 C14 105(2) . . ? 
N9 C15 C14 106.6(18) . . ? 
N12 C15 H15 109.7 . . ? 
N9 C15 H15 109.7 . . ? 
C14 C15 H15 109.7 . . ? 
O6 C16 N12 125(2) . . ? 
O6 C16 N11 126(2) . . ? 
N12 C16 N11 108(2) . . ? 
N13 C17 N10 117.2(18) . . ? 
N13 C17 H17A 108.0 . . ? 
N10 C17 H17A 108.0 . . ? 
N13 C17 H17B 108.0 . . ? 
N10 C17 H17B 108.0 . . ? 
H17A C17 H17B 107.3 . . ? 
N16 C18 N11 114.7(18) . . ? 
N16 C18 H18A 108.6 . . ? 
N11 C18 H18A 108.6 . . ? 
N16 C18 H18B 108.6 . . ? 
N11 C18 H18B 108.6 . . ? 
H18A C18 H18B 107.6 . . ? 
O7 C19 N13 126(2) . . ? 
O7 C19 N14 119(2) . . ? 
N13 C19 N14 114.4(19) . . ? 
N15 C20 C21 104.4(19) . . ? 
N15 C20 N14 115(2) . . ? 
C21 C20 N14 103.9(18) . . ? 
N15 C20 H20 110.9 . . ? 
C21 C20 H20 110.9 . . ? 
N14 C20 H20 110.9 . . ? 
N16 C21 N13 114.9(18) . . ? 
N16 C21 C20 104.0(17) . . ? 
N13 C21 C20 105.9(17) . . ? 
N16 C21 H21 110.6 . . ? 
N13 C21 H21 110.6 . . ? 
C20 C21 H21 110.6 . . ? 
O8 C22 N16 129(2) . . ? 
O8 C22 N15 123(2) . . ? 
N16 C22 N15 108(2) . . ? 
N14 C23 N17 110.5(18) . . ? 
N14 C23 H23A 109.6 . . ? 
N17 C23 H23A 109.5 . . ? 
N14 C23 H23B 109.5 . . ? 
N17 C23 H23B 109.5 . . ? 
H23A C23 H23B 108.1 . . ? 
N20 C24 N15 113.0(18) . . ? 
N20 C24 H24A 109.0 . . ? 
N15 C24 H24A 109.0 . . ? 
N20 C24 H24B 109.0 . . ? 
N15 C24 H24B 109.0 . . ? 
H24A C24 H24B 107.8 . . ? 
O9 C25 N17 128(2) . . ? 
O9 C25 N18 125(2) . . ? 
N17 C25 N18 107.0(19) . . ? 
N18 C26 C27 106.4(19) . . ? 
N18 C26 N19 112.3(16) . . ? 
C27 C26 N19 106.9(19) . . ? 
N18 C26 H26 110.4 . . ? 
C27 C26 H26 110.4 . . ? 
N19 C26 H26 110.4 . . ? 
C26 C27 N17 104.8(19) . . ? 
C26 C27 N20 106(2) . . ? 
N17 C27 N20 111(2) . . ? 
C26 C27 H27 111.5 . . ? 
N17 C27 H27 111.5 . . ? 
N20 C27 H27 111.5 . . ? 
O10 C28 N20 126(2) . . ? 
O10 C28 N19 125(2) . . ? 
N20 C28 N19 108.1(18) . . ? 
N18 C29 N21 111.0(17) . . ? 
N18 C29 H29A 109.4 . . ? 
N21 C29 H29A 109.4 . . ? 
N18 C29 H29B 109.4 . . ? 
N21 C29 H29B 109.4 . . ? 
H29A C29 H29B 108.0 . . ? 
N24 C30 N19 113(2) . . ? 
N24 C30 H30A 109.1 . . ? 
N19 C30 H30A 109.1 . . ? 
N24 C30 H30B 109.1 . . ? 
N19 C30 H30B 109.1 . . ? 
H30A C30 H30B 107.8 . . ? 
O11 C31 N21 129.4(18) . . ? 
O11 C31 N22 122.0(18) . . ? 
N21 C31 N22 108.6(17) . . ? 
N22 C32 N23 115(2) . . ? 
N22 C32 C33 106.0(18) . . ? 
N23 C32 C33 100.4(17) . . ? 
N22 C32 H32 111.5 . . ? 
N23 C32 H32 111.5 . . ? 
C33 C32 H32 111.5 . . ? 
N21 C33 N24 112.6(19) . . ? 
N21 C33 C32 101.3(17) . . ? 
N24 C33 C32 104.2(17) . . ? 
N21 C33 H33 112.6 . . ? 
N24 C33 H33 112.6 . . ? 
C32 C33 H33 112.6 . . ? 
O12 C34 N23 127.5(18) . . ? 
O12 C34 N24 124.3(17) . . ? 
N23 C34 N24 106.9(17) . . ? 
N22 C35 N1 115.6(16) . . ? 
N22 C35 H35A 108.4 . . ? 
N1 C35 H35A 108.4 . . ? 
N22 C35 H35B 108.4 . . ? 
N1 C35 H35B 108.4 . . ? 
H35A C35 H35B 107.4 . . ? 
N23 C36 N4 114.5(18) . . ? 
N23 C36 H36A 108.6 . . ? 
N4 C36 H36A 108.6 . . ? 
N23 C36 H36B 108.6 . . ? 
N4 C36 H36B 108.6 . . ? 
H36A C36 H36B 107.6 . . ? 
O13 C37 N25 128.1(18) . . ? 
O13 C37 N26 127.3(18) . . ? 
N25 C37 N26 104.6(19) . . ? 
N27 C38 N26 120.2(19) . . ? 
N27 C38 C39 105.1(19) . . ? 
N26 C38 C39 105.1(17) . . ? 
N27 C38 H38 108.6 . . ? 
N26 C38 H38 108.6 . . ? 
C39 C38 H38 108.6 . . ? 
N28 C39 N25 117.0(18) . . ? 
N28 C39 C38 103.4(17) . . ? 
N25 C39 C38 98.4(16) . . ? 
N28 C39 H39 112.2 . . ? 
N25 C39 H39 112.2 . . ? 
C38 C39 H39 112.3 . . ? 
O14 C40 N28 128(2) . . ? 
O14 C40 N27 123(2) . . ? 
N28 C40 N27 108.6(18) . . ? 
N26 C41 N29 111.1(19) . . ? 
N26 C41 H41A 109.4 . . ? 
N29 C41 H41A 109.4 . . ? 
N26 C41 H41B 109.4 . . ? 
N29 C41 H41B 109.4 . . ? 
H41A C41 H41B 108.0 . . ? 
N27 C42 N32 118(2) . . ? 
N27 C42 H42A 107.7 . . ? 
N32 C42 H42A 107.7 . . ? 
N27 C42 H42B 107.7 . . ? 
N32 C42 H42B 107.7 . . ? 
H42A C42 H42B 107.1 . . ? 
O15 C43 N29 123.0(17) . . ? 
O15 C43 N30 125.5(18) . . ? 
N29 C43 N30 111.4(17) . . ? 
N31 C44 C45 105(2) . . ? 
N31 C44 N30 115(2) . . ? 
C45 C44 N30 106.1(19) . . ? 
N31 C44 H44 110.4 . . ? 
C45 C44 H44 110.4 . . ? 
N30 C44 H44 110.4 . . ? 
C44 C45 N32 104(2) . . ? 
C44 C45 N29 103.5(18) . . ? 
N32 C45 N29 111.5(18) . . ? 
C44 C45 H45 112.5 . . ? 
N32 C45 H45 112.5 . . ? 
N29 C45 H45 112.5 . . ? 
N32 C46 O16 133(3) . . ? 
N32 C46 N31 110(2) . . ? 
O16 C46 N31 115(2) . . ? 
N30 C47 N33 113.9(18) . . ? 
N30 C47 H47A 108.8 . . ? 
N33 C47 H47A 108.8 . . ? 
N30 C47 H47B 108.8 . . ? 
N33 C47 H47B 108.8 . . ? 
H47A C47 H47B 107.7 . . ? 
N31 C48 N36 113(2) . . ? 
N31 C48 H48A 109.0 . . ? 
N36 C48 H48A 109.0 . . ? 
N31 C48 H48B 109.0 . . ? 
N36 C48 H48B 109.0 . . ? 
H48A C48 H48B 107.8 . . ? 
O17 C49 N33 123(2) . . ? 
O17 C49 N34 124(2) . . ? 
N33 C49 N34 113(2) . . ? 
C51 C50 N35 106(2) . . ? 
C51 C50 N34 108.6(19) . . ? 
N35 C50 N34 115(2) . . ? 
C51 C50 H50 109.2 . . ? 
N35 C50 H50 109.2 . . ? 
N34 C50 H50 109.2 . . ? 
N36 C51 C50 106(2) . . ? 
N36 C51 N33 111.5(19) . . ? 
C50 C51 N33 101.9(18) . . ? 
N36 C51 H51 112.1 . . ? 
C50 C51 H51 112.1 . . ? 
N33 C51 H51 112.1 . . ? 
N36 C52 O18 125(3) . . ? 
N36 C52 N35 112(3) . . ? 
O18 C52 N35 123(3) . . ? 
N37 C53 N34 111(2) . . ? 
N37 C53 H53A 109.4 . . ? 
N34 C53 H53A 109.4 . . ? 
N37 C53 H53B 109.4 . . ? 
N34 C53 H53B 109.4 . . ? 
H53A C53 H53B 108.0 . . ? 
N35 C54 N40 112(2) . . ? 
N35 C54 H54A 109.3 . . ? 
N40 C54 H54A 109.3 . . ? 
N35 C54 H54B 109.3 . . ? 
N40 C54 H54B 109.3 . . ? 
H54A C54 H54B 108.0 . . ? 
O19 C55 N38 124(3) . . ? 
O19 C55 N37 124(3) . . ? 
N38 C55 N37 112(3) . . ? 
N38 C56 N39 119(3) . . ? 
N38 C56 C57 105.0(19) . . ? 
N39 C56 C57 102(2) . . ? 
N38 C56 H56 110.1 . . ? 
N39 C56 H56 110.1 . . ? 
C57 C56 H56 110.1 . . ? 
N40 C57 N37 117(2) . . ? 
N40 C57 C56 105(2) . . ? 
N37 C57 C56 102(2) . . ? 
N40 C57 H57 110.9 . . ? 
N37 C57 H57 110.9 . . ? 
C56 C57 H57 110.9 . . ? 
O20 C58 N40 127(3) . . ? 
O20 C58 N39 124(2) . . ? 
N40 C58 N39 108(2) . . ? 
N38 C59 N41 118(2) . . ? 
N38 C59 H59A 107.8 . . ? 
N41 C59 H59A 107.8 . . ? 
N38 C59 H59B 107.8 . . ? 
N41 C59 H59B 107.8 . . ? 
H59A C59 H59B 107.2 . . ? 
N39 C60 N44 113(2) . . ? 
N39 C60 H60A 108.9 . . ? 
N44 C60 H60A 108.9 . . ? 
N39 C60 H60B 108.9 . . ? 
N44 C60 H60B 108.9 . . ? 
H60A C60 H60B 107.7 . . ? 
O21 C61 N41 128(2) . . ? 
O21 C61 N42 125(2) . . ? 
N41 C61 N42 107(2) . . ? 
N42 C62 N43 114.6(17) . . ? 
N42 C62 C63 101.1(19) . . ? 
N43 C62 C63 99(2) . . ? 
N42 C62 H62 113.5 . . ? 
N43 C62 H62 113.5 . . ? 
C63 C62 H62 113.5 . . ? 
N44 C63 N41 121(2) . . ? 
N44 C63 C62 106(2) . . ? 
N41 C63 C62 103(2) . . ? 
N44 C63 H63 109.0 . . ? 
N41 C63 H63 109.0 . . ? 
C62 C63 H63 109.0 . . ? 
O22 C64 N44 123(2) . . ? 
O22 C64 N43 126(2) . . ? 
N44 C64 N43 111(2) . . ? 
N45 C65 N42 115.4(18) . . ? 
N45 C65 H65A 108.4 . . ? 
N42 C65 H65A 108.4 . . ? 
N45 C65 H65B 108.4 . . ? 
N42 C65 H65B 108.4 . . ? 
H65A C65 H65B 107.5 . . ? 
N43 C66 N48 111.2(19) . . ? 
N43 C66 H66A 109.4 . . ? 
N48 C66 H66A 109.4 . . ? 
N43 C66 H66B 109.4 . . ? 
N48 C66 H66B 109.4 . . ? 
H66A C66 H66B 108.0 . . ? 
O23 C67 N46 127.0(18) . . ? 
O23 C67 N45 125.4(17) . . ? 
N46 C67 N45 107.6(19) . . ? 
N46 C68 N47 116.0(16) . . ? 
N46 C68 C69 103.1(17) . . ? 
N47 C68 C69 102.9(17) . . ? 
N46 C68 H68 111.4 . . ? 
N47 C68 H68 111.4 . . ? 
C69 C68 H68 111.4 . . ? 
N48 C69 N45 117.0(19) . . ? 
N48 C69 C68 102.1(18) . . ? 
N45 C69 C68 101.9(18) . . ? 
N48 C69 H69 111.7 . . ? 
N45 C69 H69 111.7 . . ? 
C68 C69 H69 111.7 . . ? 
N47 C70 O24 122.3(19) . . ? 
N47 C70 N48 115(2) . . ? 
O24 C70 N48 123(2) . . ? 
N46 C71 N25 109.8(15) . . ? 
N46 C71 H71A 109.7 . . ? 
N25 C71 H71A 109.7 . . ? 
N46 C71 H71B 109.7 . . ? 
N25 C71 H71B 109.7 . . ? 
H71A C71 H71B 108.2 . . ? 
N47 C72 N28 113.6(18) . . ? 
N47 C72 H72A 108.8 . . ? 
N28 C72 H72A 108.8 . . ? 
N47 C72 H72B 108.8 . . ? 
N28 C72 H72B 108.8 . . ? 
H72A C72 H72B 107.7 . . ? 

#===END

data_9 
 
_audit_creation_method            SHELXL-97 
_chemical_name_systematic         ?
_chemical_name_common             ? 
_chemical_melting_point           ? 
_chemical_formula_moiety          ? 
_chemical_formula_sum             'C72 H112 N52 O88 Re8 Sm4' 
_chemical_formula_weight          5205.14 
 
loop_ 
 _atom_type_symbol 
 _atom_type_description 
 _atom_type_scat_dispersion_real 
 _atom_type_scat_dispersion_imag 
 _atom_type_scat_source 
 'C'  'C'   0.0033   0.0016 
 'International Tables Vol C Tables 4.2.6.8 and 6.1.1.4' 
 'H'  'H'   0.0000   0.0000 
 'International Tables Vol C Tables 4.2.6.8 and 6.1.1.4' 
 'N'  'N'   0.0061   0.0033 
 'International Tables Vol C Tables 4.2.6.8 and 6.1.1.4' 
 'O'  'O'   0.0106   0.0060 
 'International Tables Vol C Tables 4.2.6.8 and 6.1.1.4' 
 'Sm'  'Sm'  -0.1638   3.4418 
 'International Tables Vol C Tables 4.2.6.8 and 6.1.1.4' 
 'Re'  'Re'  -1.0185   7.2310 
 'International Tables Vol C Tables 4.2.6.8 and 6.1.1.4' 
 
_symmetry_cell_setting            monoclinic
_symmetry_space_group_name_H-M    'P 21/c'
 
loop_ 
 _symmetry_equiv_pos_as_xyz 
 'x, y, z' 
 '-x, y+1/2, -z+1/2' 
 '-x, -y, -z' 
 'x, -y-1/2, z-1/2' 
 
_cell_length_a                    14.3634(8) 
_cell_length_b                    23.9396(13) 
_cell_length_c                    19.8421(6) 
_cell_angle_alpha                 90.00 
_cell_angle_beta                  108.873(3) 
_cell_angle_gamma                 90.00 
_cell_volume                      6456.0(6) 
_cell_formula_units_Z             2 
_cell_measurement_temperature     100(2) 
_cell_measurement_reflns_used     134858
_cell_measurement_theta_min       2.96
_cell_measurement_theta_max       25.68
 
_exptl_crystal_description        platelet
_exptl_crystal_colour             colourless
_exptl_crystal_size_max           0.12
_exptl_crystal_size_mid           0.12
_exptl_crystal_size_min           0.05
_exptl_crystal_density_meas       ? 
_exptl_crystal_density_diffrn     2.678 
_exptl_crystal_density_method     'not measured' 
_exptl_crystal_F_000              4920 
_exptl_absorpt_coefficient_mu     9.392 
_exptl_absorpt_correction_type    'multi-scan'
_exptl_absorpt_correction_T_min   0.378
_exptl_absorpt_correction_T_max   0.625
_exptl_absorpt_process_details    
'SCALEPACK (Otwinowski & Minor, 1997)'  
_exptl_special_details
'crystal-to-detector distance 40 mm'
_diffrn_ambient_temperature       100(2)
_diffrn_radiation_wavelength      0.71073 
_diffrn_radiation_type            MoK\a 
_diffrn_radiation_source          'fine-focus sealed tube' 
_diffrn_radiation_monochromator   graphite 
_diffrn_measurement_device_type   
'Nonius Kappa-CCD area-detector diffractometer'  
_diffrn_measurement_method        
'two \f and three \w scans with 2\% steps (425 frames)' 
_diffrn_standards_interval_time   0
_diffrn_standards_number          0
_diffrn_standards_decay_%         0
_diffrn_reflns_number             134858
_diffrn_reflns_av_R_equivalents   0.0441 
_diffrn_reflns_av_sigmaI/netI     0.0569 
_diffrn_reflns_limit_h_min        -17 
_diffrn_reflns_limit_h_max        17 
_diffrn_reflns_limit_k_min        -29 
_diffrn_reflns_limit_k_max        29 
_diffrn_reflns_limit_l_min        -24 
_diffrn_reflns_limit_l_max        24 
_diffrn_reflns_theta_min          2.96 
_diffrn_reflns_theta_max          25.68 
_reflns_number_total              12225 
_reflns_number_gt                 10054 
_reflns_threshold_expression      >2sigma(I) 
 
_computing_data_collection        'COLLECT (Nonius, 1998)'
_computing_cell_refinement        'HKL2000 (Otwinowski & Minor, 1997)'
_computing_data_reduction         'HKL2000 (Otwinowski & Minor, 1997)'
_computing_structure_solution     'SHELXS-97 (Sheldrick, 2008)' 
_computing_structure_refinement   'SHELXL-97 (Sheldrick, 2008)' 
_computing_molecular_graphics     'SHELXTL (Sheldrick, 2008)' 
_computing_publication_material   
'SHELXTL (Sheldrick, 2008); PLATON (Spek, 2003)' 
 
_refine_special_details 
;
 Structure solved by direct methods and subsequent Fourier-difference
 synthesis. All non-hydrogen atoms were refined with anisotropic
 displacement parameters, with restraints for some badly behaving atoms,
 particularly in the counter-ions. The H atoms bound to O atoms were not 
 found. The C-bound H atoms were introduced at calculated positions and
 were treated as riding atoms with an isotropic displacement parameter 
 equal to 1.2 times that of the parent atom. The highest residual electron
 density peaks are located near atoms Re2, Re3 and Re4.
 Refinement of F^2^ against ALL reflections.  The weighted R-factor wR and 
 goodness of fit S are based on F^2^, conventional R-factors R are based 
 on F, with F set to zero for negative F^2^. The threshold expression of 
 F^2^ > 2sigma(F^2^) is used only for calculating R-factors(gt) etc. and is 
 not relevant to the choice of reflections for refinement.  R-factors based 
 on F^2^ are statistically about twice as large as those based on F, and R- 
 factors based on ALL data will be even larger. 
;
_refine_ls_structure_factor_coef  Fsqd  
_refine_ls_matrix_type            full 
_refine_ls_weighting_scheme       calc  
_refine_ls_weighting_details 
 'calc w=1/[\s^2^(Fo^2^)+(0.0408P)^2^+11.2201P] where P=(Fo^2^+2Fc^2^)/3' 
_atom_sites_solution_primary      direct 
_atom_sites_solution_secondary    difmap 
_atom_sites_solution_hydrogens    geom 
_refine_ls_hydrogen_treatment     constr 
_refine_ls_extinction_method      none 
_refine_ls_extinction_coef        ? 
_refine_ls_number_reflns          12225 
_refine_ls_number_parameters      1009 
_refine_ls_number_restraints      66 
_refine_ls_R_factor_all           0.0837 
_refine_ls_R_factor_gt            0.0669 
_refine_ls_wR_factor_ref          0.1580 
_refine_ls_wR_factor_gt           0.1518 
_refine_ls_goodness_of_fit_ref    1.131 
_refine_ls_restrained_S_all       1.137 
_refine_ls_shift/su_max           0.001 
_refine_ls_shift/su_mean          0.000 
_diffrn_measured_fraction_theta_max    0.997 
_diffrn_reflns_theta_full              25.68 
_diffrn_measured_fraction_theta_full   0.997 
_refine_diff_density_max    5.532 
_refine_diff_density_min   -3.197 
_refine_diff_density_rms    0.299 
 
loop_ 
 _atom_site_label 
 _atom_site_type_symbol 
 _atom_site_fract_x 
 _atom_site_fract_y 
 _atom_site_fract_z 
 _atom_site_U_iso_or_equiv 
 _atom_site_adp_type 
 _atom_site_occupancy 
 _atom_site_symmetry_multiplicity 
 _atom_site_calc_flag 
 _atom_site_refinement_flags 
 _atom_site_disorder_assembly 
 _atom_site_disorder_group 
Sm1 Sm 0.55302(6) 1.08155(4) 0.12799(4) 0.02689(19) Uani 1 1 d . . . 
Sm2 Sm 0.97197(6) 0.77650(4) 0.35091(5) 0.0320(2) Uani 1 1 d . . . 
Re1 Re 0.75210(4) 0.87813(3) 0.22502(3) 0.02399(15) Uani 1 1 d . . . 
Re2 Re 1.14299(5) 0.79034(3) 0.56063(4) 0.02881(17) Uani 1 1 d . . . 
Re3 Re 0.69030(6) 0.12764(3) 0.56405(4) 0.02645(16) Uani 1 1 d . . . 
Re4 Re 0.34380(8) 0.05555(5) 0.38345(6) 0.0435(3) Uani 1 1 d . . . 
O1 O 0.5076(7) 1.0219(4) 0.2104(5) 0.023(2) Uani 1 1 d . . . 
O2 O 0.7160(7) 0.8485(4) 0.4195(6) 0.026(2) Uani 1 1 d . . . 
O3 O 0.7089(8) 1.0655(4) 0.2163(5) 0.024(2) Uani 1 1 d . . . 
O4 O 0.9588(8) 0.9218(4) 0.4647(6) 0.031(3) Uani 1 1 d . . . 
O5 O 0.8482(9) 1.0239(6) 0.0985(6) 0.045(3) Uani 1 1 d . . . 
O6 O 1.0541(9) 0.8651(5) 0.3381(6) 0.033(3) Uani 1 1 d . . . 
O7 O 0.7676(9) 0.9176(6) -0.0108(7) 0.047(3) Uani 1 1 d . . . 
O8 O 0.9626(9) 0.7613(6) 0.2314(6) 0.044(3) Uani 1 1 d . . . 
O9 O 0.5316(8) 0.8612(6) -0.0275(6) 0.043(3) Uani 1 1 d . . . 
O10 O 0.7219(8) 0.6882(5) 0.2101(7) 0.040(3) Uani 1 1 d . . . 
O11 O 0.4245(8) 0.9141(4) 0.0906(5) 0.027(2) Uani 1 1 d . . . 
O12 O 0.6008(8) 0.7363(4) 0.3084(6) 0.029(2) Uani 1 1 d . . . 
O13 O 0.5983(12) 1.1689(6) 0.2109(10) 0.070(5) Uani 1 1 d . . . 
O14 O 0.6657(12) 1.1682(6) 0.1337(8) 0.061(4) Uani 1 1 d . . . 
O15 O 0.7212(12) 1.2271(7) 0.2290(9) 0.064(4) Uani 1 1 d . . . 
O16 O 0.4077(8) 1.0348(5) 0.0514(7) 0.044(3) Uani 1 1 d . . . 
O17 O 0.6589(9) 1.0726(5) 0.0549(6) 0.036(3) Uani 1 1 d . . . 
O18 O 0.4253(9) 1.1241(4) 0.1684(6) 0.035(3) Uani 1 1 d . . . 
O19 O 0.5882(8) 0.9809(4) 0.1078(6) 0.033(3) Uani 1 1 d . . . 
O20 O 0.8531(13) 0.8433(8) 0.2777(10) 0.086(5) Uani 1 1 d U . . 
O21 O 0.7785(15) 0.8997(9) 0.1539(10) 0.096(6) Uani 1 1 d U . . 
O22 O 0.6549(12) 0.8357(8) 0.2079(10) 0.084(5) Uani 1 1 d U . . 
O23 O 0.7284(15) 0.9313(9) 0.2734(12) 0.097(6) Uani 1 1 d U . . 
O24 O 1.0930(8) 0.7993(5) 0.4687(6) 0.036(3) Uani 1 1 d . . . 
O25 O 1.0630(9) 0.8119(5) 0.6007(8) 0.052(4) Uani 1 1 d . . . 
O26 O 1.1710(9) 0.7202(5) 0.5808(7) 0.045(3) Uani 1 1 d . . . 
O27 O 1.2490(8) 0.8281(4) 0.5929(7) 0.037(3) Uani 1 1 d . . . 
O28 O 0.9617(10) 0.6707(5) 0.3213(6) 0.042(2) Uani 1 1 d U . . 
O29 O 0.9928(9) 0.6944(5) 0.4316(6) 0.0401(19) Uani 1 1 d . . . 
O30 O 0.9665(10) 0.6084(5) 0.4001(7) 0.049(2) Uani 1 1 d U . . 
O31 O 1.1355(8) 0.7441(5) 0.3583(7) 0.041(3) Uani 1 1 d . . . 
O32 O 0.8978(8) 0.8172(5) 0.4332(7) 0.041(3) Uani 1 1 d . . . 
O33 O 0.8089(9) 0.7377(7) 0.3329(7) 0.057(4) Uani 1 1 d . . . 
O34 O 0.7208(8) 0.1133(5) 0.6537(6) 0.033(3) Uani 1 1 d . . . 
O35 O 0.5661(8) 0.1165(5) 0.5229(6) 0.036(3) Uani 1 1 d . . . 
O36 O 0.7103(8) 0.1985(4) 0.5535(6) 0.034(3) Uani 1 1 d . . . 
O37 O 0.7606(8) 0.0872(4) 0.5253(6) 0.031(3) Uani 1 1 d . . . 
O38 O 0.2643(15) 0.0269(10) 0.3024(11) 0.105(6) Uani 1 1 d U . . 
O39 O 0.3121(17) 0.1081(9) 0.4335(12) 0.105(6) Uani 1 1 d U . . 
O40 O 0.3804(10) -0.0007(5) 0.4396(6) 0.037(3) Uani 1 1 d . . . 
O41 O 0.4383(9) 0.0820(5) 0.3609(7) 0.043(3) Uani 1 1 d . . . 
O42 O 0.2594(18) 1.0769(10) 0.1787(13) 0.116(7) Uani 1 1 d U . . 
O43 O 0.7913(15) 1.0210(9) -0.0846(11) 0.097(6) Uani 1 1 d U . . 
O44 O 1.1879(16) 0.6158(9) 0.5180(12) 0.103(7) Uani 1 1 d U . . 
N1 N 0.4758(8) 0.9513(5) 0.2782(6) 0.018(2) Uani 1 1 d . . . 
N2 N 0.5893(9) 1.0139(5) 0.3301(6) 0.019(2) Uani 1 1 d . . . 
N3 N 0.6783(9) 0.9433(5) 0.4131(6) 0.021(3) Uani 1 1 d . . . 
N4 N 0.5593(8) 0.8811(4) 0.3646(6) 0.018(2) Uani 1 1 d . . . 
N5 N 0.7441(8) 1.0560(5) 0.3364(6) 0.021(3) Uani 1 1 d . . . 
N6 N 0.8659(9) 1.0531(5) 0.2927(7) 0.024(3) Uani 1 1 d . . . 
N7 N 0.9664(9) 0.9966(6) 0.3930(7) 0.033(3) Uani 1 1 d . . . 
N8 N 0.8358(9) 0.9886(5) 0.4282(7) 0.027(3) Uani 1 1 d . . . 
N9 N 0.9539(10) 1.0212(6) 0.2145(7) 0.036(3) Uani 1 1 d . . . 
N10 N 0.9844(10) 0.9670(6) 0.1337(7) 0.030(3) Uani 1 1 d . . . 
N11 N 1.0599(9) 0.8992(6) 0.2298(7) 0.031(3) Uani 1 1 d . . . 
N12 N 1.0476(9) 0.9593(6) 0.3126(7) 0.032(3) Uani 1 1 d . . . 
N13 N 0.9202(9) 0.8863(6) 0.0584(7) 0.034(3) Uani 1 1 d . . . 
N14 N 0.8001(9) 0.8250(7) 0.0156(7) 0.033(3) Uani 1 1 d . . . 
N15 N 0.8786(9) 0.7610(6) 0.1122(7) 0.029(3) Uani 1 1 d . . . 
N16 N 1.0027(9) 0.8211(6) 0.1538(7) 0.029(3) Uani 1 1 d . . . 
N17 N 0.6382(10) 0.7852(6) 0.0000(7) 0.032(3) Uani 1 1 d . . . 
N18 N 0.5065(9) 0.7833(6) 0.0348(7) 0.026(3) Uani 1 1 d . . . 
N19 N 0.5785(9) 0.7120(5) 0.1246(7) 0.027(3) Uani 1 1 d . . . 
N20 N 0.7181(10) 0.7255(6) 0.1033(7) 0.030(3) Uani 1 1 d . . . 
N21 N 0.4143(9) 0.8193(5) 0.1088(7) 0.026(3) Uani 1 1 d . . . 
N22 N 0.4072(9) 0.8769(5) 0.1929(6) 0.022(3) Uani 1 1 d . . . 
N23 N 0.4871(9) 0.8071(5) 0.2823(6) 0.025(3) Uani 1 1 d . . . 
N24 N 0.4863(9) 0.7469(5) 0.1983(7) 0.027(3) Uani 1 1 d . . . 
N25 N 0.6638(14) 1.1899(7) 0.1947(9) 0.038(4) Uani 1 1 d . . . 
N26 N 0.9754(10) 0.6561(6) 0.3832(7) 0.0306(19) Uani 1 1 d . . . 
C1 C 0.5226(10) 0.9979(6) 0.2680(8) 0.021(3) Uani 1 1 d . . . 
C2 C 0.5901(11) 0.9770(6) 0.3879(7) 0.020(3) Uani 1 1 d . . . 
H2 H 0.5768 0.9971 0.4268 0.024 Uiso 1 1 calc R . . 
C3 C 0.5081(11) 0.9345(5) 0.3521(7) 0.018(3) Uani 1 1 d . . . 
H3 H 0.4545 0.9357 0.3726 0.022 Uiso 1 1 calc R . . 
C4 C 0.6581(11) 0.8872(6) 0.4010(7) 0.021(3) Uani 1 1 d . . . 
C5 C 0.6438(10) 1.0648(6) 0.3395(7) 0.020(3) Uani 1 1 d . . . 
H5A H 0.6480 1.0810 0.3852 0.024 Uiso 1 1 calc R . . 
H5B H 0.6092 1.0911 0.3027 0.024 Uiso 1 1 calc R . . 
C6 C 0.7710(12) 0.9648(7) 0.4621(8) 0.031(4) Uani 1 1 d . . . 
H6A H 0.7561 0.9929 0.4922 0.038 Uiso 1 1 calc R . . 
H6B H 0.8050 0.9345 0.4927 0.038 Uiso 1 1 calc R . . 
C7 C 0.7671(11) 1.0587(6) 0.2754(8) 0.022(3) Uani 1 1 d . . . 
C8 C 0.9145(11) 1.0489(6) 0.3684(8) 0.023(3) Uani 1 1 d . . . 
H8 H 0.9565 1.0813 0.3872 0.028 Uiso 1 1 calc R . . 
C9 C 0.8277(10) 1.0452(5) 0.3988(8) 0.019(3) Uani 1 1 d . . . 
H9 H 0.8336 1.0735 0.4357 0.023 Uiso 1 1 calc R . . 
C10 C 0.9219(13) 0.9640(6) 0.4299(10) 0.034(4) Uani 1 1 d . . . 
C11 C 0.9157(13) 1.0674(7) 0.2426(10) 0.035(4) Uani 1 1 d . . . 
H11A H 0.8702 1.0876 0.2033 0.042 Uiso 1 1 calc R . . 
H11B H 0.9696 1.0924 0.2658 0.042 Uiso 1 1 calc R . . 
C12 C 1.0598(12) 0.9806(7) 0.3842(8) 0.034(4) Uani 1 1 d . . . 
H12A H 1.0908 0.9520 0.4190 0.041 Uiso 1 1 calc R . . 
H12B H 1.1032 1.0127 0.3935 0.041 Uiso 1 1 calc R . . 
C13 C 0.9222(12) 1.0054(8) 0.1470(9) 0.038(4) Uani 1 1 d . . . 
C14 C 1.0671(11) 0.9522(7) 0.2007(8) 0.032(4) Uani 1 1 d . . . 
H14 H 1.1316 0.9576 0.1946 0.038 Uiso 1 1 calc R . . 
C15 C 1.0498(11) 0.9950(6) 0.2546(9) 0.030(4) Uani 1 1 d . . . 
H15 H 1.1028 1.0227 0.2697 0.036 Uiso 1 1 calc R . . 
C16 C 1.0539(11) 0.9050(6) 0.2980(9) 0.026(3) Uani 1 1 d . . . 
C17 C 0.9699(11) 0.9396(7) 0.0677(8) 0.029(4) Uani 1 1 d . . . 
H17A H 1.0337 0.9341 0.0617 0.035 Uiso 1 1 calc R . . 
H17B H 0.9324 0.9643 0.0298 0.035 Uiso 1 1 calc R . . 
C18 C 1.0834(11) 0.8477(7) 0.2037(8) 0.031(4) Uani 1 1 d . . . 
H18A H 1.1337 0.8543 0.1817 0.037 Uiso 1 1 calc R . . 
H18B H 1.1109 0.8226 0.2436 0.037 Uiso 1 1 calc R . . 
C19 C 0.8232(12) 0.8806(8) 0.0191(8) 0.032(4) Uani 1 1 d . . . 
C20 C 0.8848(12) 0.7898(7) 0.0494(8) 0.029(4) Uani 1 1 d . . . 
H20 H 0.8989 0.7641 0.0155 0.035 Uiso 1 1 calc R . . 
C21 C 0.9668(11) 0.8329(7) 0.0782(7) 0.027(3) Uani 1 1 d . . . 
H21 H 1.0190 0.8274 0.0570 0.032 Uiso 1 1 calc R . . 
C22 C 0.9501(12) 0.7795(7) 0.1708(9) 0.032(4) Uani 1 1 d . . . 
C23 C 0.7077(12) 0.8052(9) -0.0339(9) 0.041(5) Uani 1 1 d . . . 
H23A H 0.7214 0.7752 -0.0622 0.049 Uiso 1 1 calc R . . 
H23B H 0.6773 0.8354 -0.0662 0.049 Uiso 1 1 calc R . . 
C24 C 0.8191(11) 0.7129(6) 0.1104(9) 0.032(4) Uani 1 1 d . . . 
H24A H 0.8478 0.6917 0.1538 0.038 Uiso 1 1 calc R . . 
H24B H 0.8202 0.6895 0.0708 0.038 Uiso 1 1 calc R . . 
C25 C 0.5577(11) 0.8149(8) 0.0002(8) 0.033(4) Uani 1 1 d . . . 
C26 C 0.5476(12) 0.7285(7) 0.0494(9) 0.034(4) Uani 1 1 d . . . 
H26 H 0.5034 0.7006 0.0193 0.041 Uiso 1 1 calc R . . 
C27 C 0.6434(13) 0.7312(7) 0.0339(9) 0.036(4) Uani 1 1 d . . . 
H27 H 0.6481 0.7010 0.0019 0.043 Uiso 1 1 calc R . . 
C28 C 0.6743(13) 0.7075(7) 0.1519(8) 0.030(4) Uani 1 1 d . . . 
C29 C 0.4118(11) 0.8002(6) 0.0386(8) 0.026(3) Uani 1 1 d . . . 
H29A H 0.3668 0.7688 0.0247 0.031 Uiso 1 1 calc R . . 
H29B H 0.3862 0.8300 0.0045 0.031 Uiso 1 1 calc R . . 
C30 C 0.5130(12) 0.6991(7) 0.1630(9) 0.030(4) Uani 1 1 d . . . 
H30A H 0.5434 0.6710 0.1985 0.036 Uiso 1 1 calc R . . 
H30B H 0.4535 0.6830 0.1303 0.036 Uiso 1 1 calc R . . 
C31 C 0.4172(10) 0.8743(7) 0.1278(8) 0.026(3) Uani 1 1 d . . . 
C32 C 0.3987(11) 0.8227(6) 0.2228(7) 0.022(3) Uani 1 1 d . . . 
H32 H 0.3379 0.8186 0.2346 0.026 Uiso 1 1 calc R . . 
C33 C 0.4039(10) 0.7828(6) 0.1633(7) 0.020(3) Uani 1 1 d . . . 
H33 H 0.3432 0.7610 0.1454 0.024 Uiso 1 1 calc R . . 
C34 C 0.5302(11) 0.7606(6) 0.2661(8) 0.024(3) Uani 1 1 d . . . 
C35 C 0.3900(11) 0.9293(6) 0.2256(8) 0.024(3) Uani 1 1 d . . . 
H35A H 0.3650 0.9570 0.1885 0.029 Uiso 1 1 calc R . . 
H35B H 0.3397 0.9229 0.2476 0.029 Uiso 1 1 calc R . . 
C36 C 0.5085(12) 0.8282(6) 0.3533(7) 0.024(3) Uani 1 1 d . . . 
H36A H 0.5485 0.8010 0.3865 0.029 Uiso 1 1 calc R . . 
H36B H 0.4473 0.8324 0.3636 0.029 Uiso 1 1 calc R . . 
 
loop_ 
 _atom_site_aniso_label 
 _atom_site_aniso_U_11 
 _atom_site_aniso_U_22 
 _atom_site_aniso_U_33 
 _atom_site_aniso_U_23 
 _atom_site_aniso_U_13 
 _atom_site_aniso_U_12 
Sm1 0.0265(4) 0.0353(5) 0.0208(4) 0.0041(3) 0.0103(3) -0.0042(3) 
Sm2 0.0262(4) 0.0401(5) 0.0287(5) 0.0075(4) 0.0074(4) 0.0045(4) 
Re1 0.0211(3) 0.0275(3) 0.0237(3) -0.0025(2) 0.0076(2) 0.0035(2) 
Re2 0.0278(3) 0.0252(3) 0.0291(4) 0.0038(3) 0.0032(3) -0.0029(3) 
Re3 0.0281(4) 0.0269(4) 0.0253(3) 0.0020(3) 0.0100(3) 0.0037(3) 
Re4 0.0438(5) 0.0440(7) 0.0532(7) 0.0191(5) 0.0301(5) 0.0110(5) 
O1 0.017(5) 0.031(6) 0.019(5) 0.004(4) 0.002(4) 0.003(4) 
O2 0.025(5) 0.024(6) 0.031(6) 0.002(4) 0.012(5) 0.005(4) 
O3 0.029(6) 0.029(6) 0.015(5) -0.002(4) 0.009(5) 0.002(4) 
O4 0.029(6) 0.022(6) 0.034(6) 0.001(5) -0.001(5) 0.001(5) 
O5 0.049(8) 0.060(9) 0.031(7) 0.015(6) 0.020(6) 0.028(7) 
O6 0.050(7) 0.030(6) 0.021(6) -0.004(5) 0.014(5) 0.004(5) 
O7 0.033(7) 0.066(9) 0.042(7) 0.032(7) 0.013(6) 0.021(6) 
O8 0.039(7) 0.057(8) 0.032(7) 0.011(6) 0.007(6) -0.005(6) 
O9 0.021(6) 0.078(10) 0.025(6) 0.026(6) 0.001(5) 0.002(6) 
O10 0.030(6) 0.038(7) 0.049(8) -0.002(6) 0.008(6) 0.003(5) 
O11 0.033(6) 0.025(6) 0.026(6) -0.004(5) 0.012(5) -0.011(5) 
O12 0.031(6) 0.018(5) 0.033(6) -0.009(5) 0.002(5) -0.003(5) 
O13 0.068(10) 0.041(9) 0.102(13) 0.007(8) 0.028(10) -0.010(8) 
O14 0.082(8) 0.043(7) 0.052(7) -0.008(6) 0.013(6) -0.005(6) 
O15 0.070(8) 0.065(8) 0.063(8) -0.023(7) 0.031(6) -0.008(6) 
O16 0.031(6) 0.036(7) 0.059(8) -0.024(6) 0.008(6) 0.007(5) 
O17 0.046(7) 0.028(6) 0.042(7) -0.001(5) 0.027(6) -0.006(5) 
O18 0.064(8) 0.022(6) 0.028(6) -0.002(5) 0.026(6) -0.003(5) 
O19 0.034(6) 0.026(6) 0.045(7) 0.009(5) 0.021(5) 0.007(5) 
O20 0.074(8) 0.103(9) 0.077(9) 0.022(7) 0.019(7) 0.016(7) 
O21 0.099(10) 0.114(10) 0.081(9) 0.016(8) 0.037(8) 0.006(8) 
O22 0.058(8) 0.090(9) 0.103(9) -0.028(8) 0.023(7) -0.013(7) 
O23 0.096(9) 0.088(9) 0.120(10) -0.025(8) 0.049(8) -0.003(8) 
O24 0.033(6) 0.036(7) 0.040(7) 0.013(5) 0.014(5) 0.002(5) 
O25 0.034(7) 0.038(7) 0.074(10) 0.007(7) 0.001(7) -0.001(6) 
O26 0.042(7) 0.026(6) 0.058(9) 0.009(6) 0.004(6) -0.005(5) 
O27 0.035(6) 0.014(5) 0.056(8) -0.002(5) 0.006(6) -0.010(5) 
O28 0.055(4) 0.036(4) 0.031(4) 0.001(3) 0.008(3) -0.002(3) 
O29 0.055(4) 0.035(4) 0.028(4) 0.002(3) 0.011(3) -0.003(3) 
O30 0.064(4) 0.041(4) 0.035(4) 0.001(3) 0.007(3) -0.002(3) 
O31 0.033(6) 0.036(7) 0.048(8) -0.008(6) 0.007(6) -0.001(5) 
O32 0.030(6) 0.029(6) 0.057(8) -0.001(6) 0.002(6) 0.001(5) 
O33 0.026(7) 0.089(11) 0.052(9) -0.008(8) 0.008(6) -0.006(7) 
O34 0.028(6) 0.045(7) 0.028(6) 0.009(5) 0.013(5) 0.000(5) 
O35 0.031(6) 0.034(7) 0.044(7) 0.004(5) 0.012(5) 0.008(5) 
O36 0.033(6) 0.023(6) 0.049(7) 0.005(5) 0.016(5) 0.008(5) 
O37 0.041(7) 0.025(6) 0.040(7) -0.004(5) 0.031(6) 0.008(5) 
O38 0.091(9) 0.117(10) 0.095(10) 0.023(8) 0.014(7) -0.030(8) 
O39 0.128(10) 0.100(10) 0.113(10) 0.018(8) 0.078(8) 0.029(8) 
O40 0.070(9) 0.022(6) 0.034(6) 0.000(5) 0.035(6) 0.000(6) 
O41 0.051(8) 0.033(7) 0.051(8) 0.006(6) 0.027(6) 0.001(6) 
O42 0.113(9) 0.124(9) 0.115(9) 0.004(5) 0.041(5) 0.000(5) 
O43 0.090(7) 0.102(8) 0.100(7) 0.013(5) 0.030(5) -0.004(5) 
O44 0.100(8) 0.104(8) 0.106(8) -0.007(5) 0.033(5) 0.004(5) 
N1 0.019(6) 0.020(6) 0.014(6) 0.007(5) 0.004(5) 0.009(5) 
N2 0.026(6) 0.009(5) 0.024(6) -0.001(5) 0.010(5) 0.004(5) 
N3 0.020(6) 0.016(6) 0.023(6) -0.002(5) 0.002(5) -0.002(5) 
N4 0.017(6) 0.010(5) 0.020(6) 0.006(5) -0.002(5) 0.005(4) 
N5 0.018(6) 0.018(6) 0.029(7) -0.003(5) 0.010(5) -0.002(5) 
N6 0.021(6) 0.029(7) 0.026(7) -0.004(5) 0.013(5) 0.003(5) 
N7 0.024(7) 0.033(8) 0.037(8) -0.012(6) 0.002(6) 0.008(6) 
N8 0.014(6) 0.019(6) 0.043(8) 0.003(6) 0.001(6) 0.001(5) 
N9 0.028(7) 0.050(9) 0.035(8) 0.001(7) 0.017(6) 0.012(7) 
N10 0.027(7) 0.035(8) 0.029(7) 0.002(6) 0.012(6) 0.005(6) 
N11 0.018(6) 0.038(8) 0.032(8) 0.001(6) 0.001(6) 0.005(6) 
N12 0.022(7) 0.048(9) 0.025(7) 0.003(6) 0.008(6) 0.010(6) 
N13 0.021(7) 0.057(10) 0.023(7) 0.010(6) 0.008(6) 0.002(6) 
N14 0.017(6) 0.060(10) 0.018(7) -0.004(6) 0.003(5) 0.005(6) 
N15 0.025(7) 0.033(7) 0.024(7) -0.007(6) 0.000(6) 0.008(6) 
N16 0.028(7) 0.037(8) 0.022(7) -0.003(6) 0.007(6) 0.011(6) 
N17 0.034(8) 0.053(9) 0.016(7) -0.006(6) 0.015(6) -0.007(7) 
N18 0.023(7) 0.035(7) 0.023(7) -0.005(6) 0.009(5) -0.004(6) 
N19 0.027(7) 0.025(7) 0.033(7) 0.005(6) 0.017(6) -0.003(5) 
N20 0.033(7) 0.030(7) 0.028(7) -0.008(6) 0.012(6) 0.004(6) 
N21 0.028(7) 0.017(6) 0.034(7) -0.004(5) 0.012(6) -0.013(5) 
N22 0.037(7) 0.015(6) 0.018(6) 0.002(5) 0.016(5) -0.005(5) 
N23 0.026(7) 0.020(6) 0.023(7) -0.004(5) -0.001(5) -0.003(5) 
N24 0.027(7) 0.018(6) 0.034(8) -0.004(5) 0.006(6) 0.001(5) 
N25 0.042(5) 0.042(6) 0.041(5) 0.005(4) 0.028(4) -0.007(4) 
N26 0.046(4) 0.027(3) 0.022(3) 0.003(3) 0.014(3) -0.003(3) 
C1 0.018(7) 0.019(7) 0.027(8) 0.000(6) 0.009(6) 0.006(6) 
C2 0.032(8) 0.020(7) 0.014(7) -0.003(5) 0.014(6) 0.003(6) 
C3 0.029(8) 0.013(7) 0.020(7) 0.000(5) 0.017(6) 0.002(6) 
C4 0.032(8) 0.023(8) 0.016(7) -0.002(6) 0.017(6) -0.003(6) 
C5 0.022(7) 0.019(7) 0.016(7) 0.000(6) 0.003(6) 0.001(6) 
C6 0.039(9) 0.025(8) 0.026(9) -0.003(7) 0.006(7) 0.001(7) 
C7 0.025(8) 0.012(7) 0.034(9) -0.005(6) 0.017(7) 0.003(6) 
C8 0.026(8) 0.014(7) 0.031(8) -0.011(6) 0.010(6) -0.009(6) 
C9 0.021(7) 0.012(7) 0.026(8) -0.012(6) 0.009(6) -0.001(5) 
C10 0.038(10) 0.017(8) 0.047(11) -0.009(7) 0.014(8) 0.001(7) 
C11 0.040(10) 0.027(9) 0.049(11) 0.009(8) 0.030(8) 0.011(7) 
C12 0.034(9) 0.034(9) 0.028(9) -0.013(7) 0.001(7) 0.012(7) 
C13 0.029(9) 0.053(11) 0.037(10) 0.012(9) 0.015(8) 0.010(8) 
C14 0.019(8) 0.051(11) 0.030(9) -0.017(8) 0.014(7) -0.009(7) 
C15 0.020(8) 0.015(7) 0.057(11) -0.005(7) 0.015(7) -0.003(6) 
C16 0.020(8) 0.022(8) 0.036(9) -0.007(7) 0.008(7) 0.001(6) 
C17 0.022(8) 0.040(10) 0.027(8) 0.007(7) 0.008(7) 0.014(7) 
C18 0.020(8) 0.053(11) 0.016(8) 0.001(7) 0.000(6) 0.009(7) 
C19 0.030(9) 0.058(12) 0.013(7) 0.008(7) 0.012(7) 0.012(8) 
C20 0.032(9) 0.040(9) 0.020(8) -0.005(7) 0.016(7) 0.004(7) 
C21 0.019(7) 0.047(10) 0.014(7) -0.005(7) 0.005(6) 0.008(7) 
C22 0.041(10) 0.029(9) 0.032(9) 0.003(7) 0.022(8) 0.018(7) 
C23 0.029(9) 0.075(14) 0.026(9) -0.009(9) 0.018(7) -0.009(9) 
C24 0.026(8) 0.023(8) 0.039(10) -0.004(7) 0.003(7) 0.004(6) 
C25 0.024(8) 0.067(13) 0.011(7) -0.004(8) 0.009(6) 0.001(8) 
C26 0.036(9) 0.037(10) 0.034(9) -0.012(7) 0.019(8) -0.004(7) 
C27 0.041(10) 0.035(9) 0.029(9) -0.019(7) 0.008(8) 0.000(8) 
C28 0.042(10) 0.028(8) 0.020(8) -0.008(7) 0.011(7) 0.010(7) 
C29 0.029(8) 0.027(8) 0.021(8) -0.011(6) 0.008(6) -0.010(6) 
C30 0.036(9) 0.024(8) 0.031(9) -0.003(7) 0.012(7) 0.001(7) 
C31 0.017(7) 0.035(9) 0.025(8) -0.005(7) 0.004(6) -0.009(6) 
C32 0.026(8) 0.020(7) 0.017(7) 0.002(6) 0.003(6) 0.000(6) 
C33 0.017(7) 0.020(7) 0.017(7) -0.003(6) -0.003(6) 0.004(6) 
C34 0.021(8) 0.016(7) 0.037(9) 0.002(6) 0.012(7) 0.000(6) 
C35 0.022(8) 0.021(8) 0.030(8) 0.006(6) 0.008(6) 0.002(6) 
C36 0.035(9) 0.023(8) 0.015(7) 0.003(6) 0.011(6) 0.007(6) 
 
_geom_special_details 
; 
 All esds (except the esd in the dihedral angle between two l.s. planes) 
 are estimated using the full covariance matrix.  The cell esds are taken 
 into account individually in the estimation of esds in distances, angles 
 and torsion angles; correlations between esds in cell parameters are only 
 used when they are defined by crystal symmetry.  An approximate (isotropic) 
 treatment of cell esds is used for estimating esds involving l.s. planes. 
;
loop_ 
 _geom_bond_atom_site_label_1 
 _geom_bond_atom_site_label_2 
 _geom_bond_distance 
 _geom_bond_site_symmetry_2 
 _geom_bond_publ_flag 
Sm1 O3 2.386(10) . ? 
Sm1 O9 2.402(11) 3_675 ? 
Sm1 O1 2.415(10) . ? 
Sm1 O16 2.422(12) . ? 
Sm1 O17 2.427(11) . ? 
Sm1 O18 2.449(12) . ? 
Sm1 O19 2.522(11) . ? 
Sm1 O13 2.609(16) . ? 
Sm1 O14 2.611(15) . ? 
Sm2 O8 2.359(12) . ? 
Sm2 O32 2.424(13) . ? 
Sm2 O31 2.433(12) . ? 
Sm2 O33 2.436(13) . ? 
Sm2 O20 2.445(17) . ? 
Sm2 O6 2.479(12) . ? 
Sm2 O24 2.481(12) . ? 
Sm2 O29 2.491(12) . ? 
Sm2 O28 2.593(12) . ? 
Re1 O21 1.658(19) . ? 
Re1 O22 1.670(17) . ? 
Re1 O23 1.695(19) . ? 
Re1 O20 1.707(17) . ? 
Re2 O25 1.676(15) . ? 
Re2 O27 1.708(11) . ? 
Re2 O26 1.742(12) . ? 
Re2 O24 1.744(11) . ? 
Re3 O34 1.724(11) . ? 
Re3 O35 1.726(11) . ? 
Re3 O36 1.744(11) . ? 
Re3 O37 1.747(10) . ? 
Re4 O41 1.685(12) . ? 
Re4 O40 1.718(11) . ? 
Re4 O39 1.75(2) . ? 
Re4 O38 1.78(2) . ? 
O1 C1 1.234(17) . ? 
O2 C4 1.219(17) . ? 
O3 C7 1.212(18) . ? 
O4 C10 1.240(19) . ? 
O5 C13 1.26(2) . ? 
O6 C16 1.242(19) . ? 
O7 C19 1.21(2) . ? 
O8 C22 1.236(19) . ? 
O9 C25 1.24(2) . ? 
O9 Sm1 2.402(11) 3_675 ? 
O10 C28 1.227(19) . ? 
O11 C31 1.230(18) . ? 
O12 C34 1.234(18) . ? 
O13 N25 1.20(2) . ? 
O14 N25 1.32(2) . ? 
O15 N25 1.25(2) . ? 
O28 N26 1.231(17) . ? 
O29 N26 1.292(17) . ? 
O30 N26 1.208(17) . ? 
N1 C1 1.352(18) . ? 
N1 C35 1.433(19) . ? 
N1 C3 1.445(17) . ? 
N2 C1 1.348(18) . ? 
N2 C5 1.428(17) . ? 
N2 C2 1.444(18) . ? 
N3 C4 1.379(18) . ? 
N3 C2 1.449(18) . ? 
N3 C6 1.464(19) . ? 
N4 C4 1.377(19) . ? 
N4 C36 1.443(18) . ? 
N4 C3 1.456(16) . ? 
N5 C7 1.354(19) . ? 
N5 C9 1.443(19) . ? 
N5 C5 1.477(18) . ? 
N6 C7 1.354(18) . ? 
N6 C11 1.440(19) . ? 
N6 C8 1.442(19) . ? 
N7 C10 1.36(2) . ? 
N7 C8 1.458(19) . ? 
N7 C12 1.46(2) . ? 
N8 C10 1.36(2) . ? 
N8 C6 1.43(2) . ? 
N8 C9 1.467(18) . ? 
N9 C13 1.32(2) . ? 
N9 C11 1.43(2) . ? 
N9 C15 1.49(2) . ? 
N10 C13 1.36(2) . ? 
N10 C17 1.42(2) . ? 
N10 C14 1.51(2) . ? 
N11 C16 1.39(2) . ? 
N11 C14 1.41(2) . ? 
N11 C18 1.42(2) . ? 
N12 C16 1.34(2) . ? 
N12 C15 1.44(2) . ? 
N12 C12 1.47(2) . ? 
N13 C19 1.37(2) . ? 
N13 C21 1.44(2) . ? 
N13 C17 1.45(2) . ? 
N14 C19 1.37(2) . ? 
N14 C23 1.45(2) . ? 
N14 C20 1.45(2) . ? 
N15 C22 1.35(2) . ? 
N15 C24 1.43(2) . ? 
N15 C20 1.45(2) . ? 
N16 C22 1.36(2) . ? 
N16 C18 1.41(2) . ? 
N16 C21 1.446(19) . ? 
N17 C25 1.36(2) . ? 
N17 C27 1.45(2) . ? 
N17 C23 1.45(2) . ? 
N18 C25 1.38(2) . ? 
N18 C26 1.43(2) . ? 
N18 C29 1.444(19) . ? 
N19 C28 1.31(2) . ? 
N19 C30 1.42(2) . ? 
N19 C26 1.47(2) . ? 
N20 C28 1.38(2) . ? 
N20 C24 1.44(2) . ? 
N20 C27 1.45(2) . ? 
N21 C31 1.37(2) . ? 
N21 C33 1.434(19) . ? 
N21 C29 1.456(19) . ? 
N22 C31 1.347(19) . ? 
N22 C32 1.448(18) . ? 
N22 C35 1.468(18) . ? 
N23 C34 1.362(19) . ? 
N23 C36 1.433(18) . ? 
N23 C32 1.474(18) . ? 
N24 C34 1.33(2) . ? 
N24 C33 1.445(18) . ? 
N24 C30 1.458(19) . ? 
C2 C3 1.54(2) . ? 
C2 H2 0.9800 . ? 
C3 H3 0.9800 . ? 
C5 H5A 0.9700 . ? 
C5 H5B 0.9700 . ? 
C6 H6A 0.9700 . ? 
C6 H6B 0.9700 . ? 
C8 C9 1.55(2) . ? 
C8 H8 0.9800 . ? 
C9 H9 0.9800 . ? 
C11 H11A 0.9700 . ? 
C11 H11B 0.9700 . ? 
C12 H12A 0.9700 . ? 
C12 H12B 0.9700 . ? 
C14 C15 1.56(2) . ? 
C14 H14 0.9800 . ? 
C15 H15 0.9800 . ? 
C17 H17A 0.9700 . ? 
C17 H17B 0.9700 . ? 
C18 H18A 0.9700 . ? 
C18 H18B 0.9700 . ? 
C20 C21 1.53(2) . ? 
C20 H20 0.9800 . ? 
C21 H21 0.9800 . ? 
C23 H23A 0.9700 . ? 
C23 H23B 0.9700 . ? 
C24 H24A 0.9700 . ? 
C24 H24B 0.9700 . ? 
C26 C27 1.51(2) . ? 
C26 H26 0.9800 . ? 
C27 H27 0.9800 . ? 
C29 H29A 0.9700 . ? 
C29 H29B 0.9700 . ? 
C30 H30A 0.9700 . ? 
C30 H30B 0.9700 . ? 
C32 C33 1.540(19) . ? 
C32 H32 0.9800 . ? 
C33 H33 0.9800 . ? 
C35 H35A 0.9700 . ? 
C35 H35B 0.9700 . ? 
C36 H36A 0.9700 . ? 
C36 H36B 0.9700 . ? 
 
loop_ 
 _geom_angle_atom_site_label_1 
 _geom_angle_atom_site_label_2 
 _geom_angle_atom_site_label_3 
 _geom_angle 
 _geom_angle_site_symmetry_1 
 _geom_angle_site_symmetry_3 
 _geom_angle_publ_flag 
O3 Sm1 O9 143.5(4) . 3_675 ? 
O3 Sm1 O1 78.6(3) . . ? 
O9 Sm1 O1 136.5(4) 3_675 . ? 
O3 Sm1 O16 143.1(4) . . ? 
O9 Sm1 O16 69.0(4) 3_675 . ? 
O1 Sm1 O16 77.6(4) . . ? 
O3 Sm1 O17 78.7(4) . . ? 
O9 Sm1 O17 78.5(4) 3_675 . ? 
O1 Sm1 O17 135.4(4) . . ? 
O16 Sm1 O17 99.4(4) . . ? 
O3 Sm1 O18 116.8(4) . . ? 
O9 Sm1 O18 78.6(4) 3_675 . ? 
O1 Sm1 O18 68.2(3) . . ? 
O16 Sm1 O18 79.2(4) . . ? 
O17 Sm1 O18 155.9(4) . . ? 
O3 Sm1 O19 76.9(4) . . ? 
O9 Sm1 O19 119.2(4) 3_675 . ? 
O1 Sm1 O19 69.8(3) . . ? 
O16 Sm1 O19 68.6(4) . . ? 
O17 Sm1 O19 67.9(4) . . ? 
O18 Sm1 O19 131.3(4) . . ? 
O3 Sm1 O13 71.5(4) . . ? 
O9 Sm1 O13 91.2(5) 3_675 . ? 
O1 Sm1 O13 96.5(4) . . ? 
O16 Sm1 O13 139.0(4) . . ? 
O17 Sm1 O13 111.8(5) . . ? 
O18 Sm1 O13 61.3(5) . . ? 
O19 Sm1 O13 147.6(5) . . ? 
O3 Sm1 O14 71.0(4) . . ? 
O9 Sm1 O14 73.9(4) 3_675 . ? 
O1 Sm1 O14 137.7(4) . . ? 
O16 Sm1 O14 142.3(5) . . ? 
O17 Sm1 O14 66.2(4) . . ? 
O18 Sm1 O14 100.1(4) . . ? 
O19 Sm1 O14 127.8(4) . . ? 
O13 Sm1 O14 46.5(5) . . ? 
O8 Sm2 O32 147.6(4) . . ? 
O8 Sm2 O31 75.6(4) . . ? 
O32 Sm2 O31 135.6(4) . . ? 
O8 Sm2 O33 93.1(4) . . ? 
O32 Sm2 O33 69.0(4) . . ? 
O31 Sm2 O33 138.7(5) . . ? 
O8 Sm2 O20 72.7(6) . . ? 
O32 Sm2 O20 76.2(5) . . ? 
O31 Sm2 O20 136.0(5) . . ? 
O33 Sm2 O20 73.1(6) . . ? 
O8 Sm2 O6 84.4(4) . . ? 
O32 Sm2 O6 93.0(4) . . ? 
O31 Sm2 O6 78.2(4) . . ? 
O33 Sm2 O6 141.0(5) . . ? 
O20 Sm2 O6 69.1(5) . . ? 
O8 Sm2 O24 140.9(4) . . ? 
O32 Sm2 O24 66.6(4) . . ? 
O31 Sm2 O24 69.2(4) . . ? 
O33 Sm2 O24 124.7(4) . . ? 
O20 Sm2 O24 123.8(6) . . ? 
O6 Sm2 O24 72.3(4) . . ? 
O8 Sm2 O29 118.7(4) . . ? 
O32 Sm2 O29 82.6(4) . . ? 
O31 Sm2 O29 78.3(4) . . ? 
O33 Sm2 O29 72.8(5) . . ? 
O20 Sm2 O29 144.4(5) . . ? 
O6 Sm2 O29 141.1(4) . . ? 
O24 Sm2 O29 70.5(4) . . ? 
O8 Sm2 O28 69.0(4) . . ? 
O32 Sm2 O28 122.7(4) . . ? 
O31 Sm2 O28 71.7(4) . . ? 
O33 Sm2 O28 67.2(5) . . ? 
O20 Sm2 O28 121.8(6) . . ? 
O6 Sm2 O28 143.7(4) . . ? 
O24 Sm2 O28 113.6(4) . . ? 
O29 Sm2 O28 50.3(4) . . ? 
O21 Re1 O22 115.0(10) . . ? 
O21 Re1 O23 113.0(11) . . ? 
O22 Re1 O23 105.3(9) . . ? 
O21 Re1 O20 106.9(10) . . ? 
O22 Re1 O20 108.5(10) . . ? 
O23 Re1 O20 107.8(10) . . ? 
O25 Re2 O27 108.9(6) . . ? 
O25 Re2 O26 109.3(6) . . ? 
O27 Re2 O26 108.2(6) . . ? 
O25 Re2 O24 110.2(6) . . ? 
O27 Re2 O24 110.0(6) . . ? 
O26 Re2 O24 110.2(6) . . ? 
O34 Re3 O35 109.6(5) . . ? 
O34 Re3 O36 108.7(6) . . ? 
O35 Re3 O36 106.2(5) . . ? 
O34 Re3 O37 110.7(5) . . ? 
O35 Re3 O37 111.2(6) . . ? 
O36 Re3 O37 110.2(5) . . ? 
O41 Re4 O40 111.3(6) . . ? 
O41 Re4 O39 105.0(8) . . ? 
O40 Re4 O39 106.1(8) . . ? 
O41 Re4 O38 104.0(8) . . ? 
O40 Re4 O38 104.8(8) . . ? 
O39 Re4 O38 125.4(11) . . ? 
C1 O1 Sm1 153.9(9) . . ? 
C7 O3 Sm1 157.3(9) . . ? 
C16 O6 Sm2 145.2(10) . . ? 
C22 O8 Sm2 150.1(12) . . ? 
C25 O9 Sm1 151.4(12) . 3_675 ? 
N25 O13 Sm1 103.0(13) . . ? 
N25 O14 Sm1 98.9(11) . . ? 
Re1 O20 Sm2 167.2(11) . . ? 
Re2 O24 Sm2 152.2(6) . . ? 
N26 O28 Sm2 94.2(9) . . ? 
N26 O29 Sm2 97.4(8) . . ? 
C1 N1 C35 123.2(12) . . ? 
C1 N1 C3 111.6(11) . . ? 
C35 N1 C3 123.7(12) . . ? 
C1 N2 C5 123.9(12) . . ? 
C1 N2 C2 111.9(12) . . ? 
C5 N2 C2 123.7(12) . . ? 
C4 N3 C2 111.8(12) . . ? 
C4 N3 C6 123.5(12) . . ? 
C2 N3 C6 122.7(12) . . ? 
C4 N4 C36 123.9(11) . . ? 
C4 N4 C3 112.0(11) . . ? 
C36 N4 C3 122.9(11) . . ? 
C7 N5 C9 113.5(12) . . ? 
C7 N5 C5 123.7(12) . . ? 
C9 N5 C5 122.8(11) . . ? 
C7 N6 C11 121.1(13) . . ? 
C7 N6 C8 112.6(12) . . ? 
C11 N6 C8 123.7(13) . . ? 
C10 N7 C8 113.2(13) . . ? 
C10 N7 C12 121.5(14) . . ? 
C8 N7 C12 125.1(14) . . ? 
C10 N8 C6 122.7(13) . . ? 
C10 N8 C9 111.4(13) . . ? 
C6 N8 C9 125.1(12) . . ? 
C13 N9 C11 124.6(15) . . ? 
C13 N9 C15 112.2(13) . . ? 
C11 N9 C15 121.6(14) . . ? 
C13 N10 C17 125.4(14) . . ? 
C13 N10 C14 111.4(13) . . ? 
C17 N10 C14 122.9(12) . . ? 
C16 N11 C14 110.1(13) . . ? 
C16 N11 C18 122.6(13) . . ? 
C14 N11 C18 125.1(13) . . ? 
C16 N12 C15 112.5(13) . . ? 
C16 N12 C12 123.4(14) . . ? 
C15 N12 C12 122.7(14) . . ? 
C19 N13 C21 111.4(14) . . ? 
C19 N13 C17 122.1(14) . . ? 
C21 N13 C17 125.7(12) . . ? 
C19 N14 C23 120.4(15) . . ? 
C19 N14 C20 112.8(13) . . ? 
C23 N14 C20 124.7(15) . . ? 
C22 N15 C24 124.6(14) . . ? 
C22 N15 C20 110.0(14) . . ? 
C24 N15 C20 124.3(13) . . ? 
C22 N16 C18 123.6(14) . . ? 
C22 N16 C21 111.2(13) . . ? 
C18 N16 C21 125.2(14) . . ? 
C25 N17 C27 112.4(14) . . ? 
C25 N17 C23 122.8(16) . . ? 
C27 N17 C23 124.7(15) . . ? 
C25 N18 C26 110.6(13) . . ? 
C25 N18 C29 122.3(14) . . ? 
C26 N18 C29 125.5(13) . . ? 
C28 N19 C30 123.3(14) . . ? 
C28 N19 C26 112.0(13) . . ? 
C30 N19 C26 124.6(13) . . ? 
C28 N20 C24 122.5(14) . . ? 
C28 N20 C27 109.1(13) . . ? 
C24 N20 C27 121.5(13) . . ? 
C31 N21 C33 112.3(12) . . ? 
C31 N21 C29 123.8(13) . . ? 
C33 N21 C29 123.6(12) . . ? 
C31 N22 C32 113.6(12) . . ? 
C31 N22 C35 123.3(12) . . ? 
C32 N22 C35 122.4(11) . . ? 
C34 N23 C36 123.4(13) . . ? 
C34 N23 C32 110.9(12) . . ? 
C36 N23 C32 123.5(12) . . ? 
C34 N24 C33 112.7(12) . . ? 
C34 N24 C30 124.6(13) . . ? 
C33 N24 C30 122.6(12) . . ? 
O13 N25 O15 126.0(17) . . ? 
O13 N25 O14 109.3(18) . . ? 
O15 N25 O14 124.7(17) . . ? 
O30 N26 O28 123.2(14) . . ? 
O30 N26 O29 118.5(13) . . ? 
O28 N26 O29 118.0(13) . . ? 
O1 C1 N2 125.1(13) . . ? 
O1 C1 N1 125.1(13) . . ? 
N2 C1 N1 109.8(12) . . ? 
N2 C2 N3 113.3(11) . . ? 
N2 C2 C3 103.2(11) . . ? 
N3 C2 C3 104.1(11) . . ? 
N2 C2 H2 111.9 . . ? 
N3 C2 H2 111.9 . . ? 
C3 C2 H2 111.9 . . ? 
N1 C3 N4 113.3(11) . . ? 
N1 C3 C2 103.3(11) . . ? 
N4 C3 C2 103.5(11) . . ? 
N1 C3 H3 112.0 . . ? 
N4 C3 H3 112.0 . . ? 
C2 C3 H3 112.0 . . ? 
O2 C4 N4 124.3(13) . . ? 
O2 C4 N3 127.1(14) . . ? 
N4 C4 N3 108.5(12) . . ? 
N2 C5 N5 112.0(11) . . ? 
N2 C5 H5A 109.2 . . ? 
N5 C5 H5A 109.2 . . ? 
N2 C5 H5B 109.2 . . ? 
N5 C5 H5B 109.2 . . ? 
H5A C5 H5B 107.9 . . ? 
N8 C6 N3 114.7(13) . . ? 
N8 C6 H6A 108.6 . . ? 
N3 C6 H6A 108.6 . . ? 
N8 C6 H6B 108.6 . . ? 
N3 C6 H6B 108.6 . . ? 
H6A C6 H6B 107.6 . . ? 
O3 C7 N5 125.4(13) . . ? 
O3 C7 N6 126.6(13) . . ? 
N5 C7 N6 108.0(13) . . ? 
N6 C8 N7 115.6(12) . . ? 
N6 C8 C9 103.3(11) . . ? 
N7 C8 C9 102.1(12) . . ? 
N6 C8 H8 111.7 . . ? 
N7 C8 H8 111.7 . . ? 
C9 C8 H8 111.7 . . ? 
N5 C9 N8 116.4(11) . . ? 
N5 C9 C8 101.9(11) . . ? 
N8 C9 C8 103.6(11) . . ? 
N5 C9 H9 111.4 . . ? 
N8 C9 H9 111.4 . . ? 
C8 C9 H9 111.4 . . ? 
O4 C10 N8 125.9(16) . . ? 
O4 C10 N7 125.1(15) . . ? 
N8 C10 N7 108.7(14) . . ? 
N9 C11 N6 115.2(13) . . ? 
N9 C11 H11A 108.5 . . ? 
N6 C11 H11A 108.5 . . ? 
N9 C11 H11B 108.5 . . ? 
N6 C11 H11B 108.5 . . ? 
H11A C11 H11B 107.5 . . ? 
N7 C12 N12 112.4(13) . . ? 
N7 C12 H12A 109.1 . . ? 
N12 C12 H12A 109.1 . . ? 
N7 C12 H12B 109.1 . . ? 
N12 C12 H12B 109.1 . . ? 
H12A C12 H12B 107.9 . . ? 
O5 C13 N9 126.9(17) . . ? 
O5 C13 N10 122.1(16) . . ? 
N9 C13 N10 110.8(14) . . ? 
N11 C14 N10 115.4(13) . . ? 
N11 C14 C15 105.2(13) . . ? 
N10 C14 C15 101.3(13) . . ? 
N11 C14 H14 111.4 . . ? 
N10 C14 H14 111.4 . . ? 
C15 C14 H14 111.4 . . ? 
N12 C15 N9 114.9(13) . . ? 
N12 C15 C14 101.9(12) . . ? 
N9 C15 C14 103.6(13) . . ? 
N12 C15 H15 111.9 . . ? 
N9 C15 H15 111.9 . . ? 
C14 C15 H15 111.9 . . ? 
O6 C16 N12 126.5(15) . . ? 
O6 C16 N11 123.9(14) . . ? 
N12 C16 N11 109.7(14) . . ? 
N10 C17 N13 116.3(13) . . ? 
N10 C17 H17A 108.2 . . ? 
N13 C17 H17A 108.2 . . ? 
N10 C17 H17B 108.2 . . ? 
N13 C17 H17B 108.2 . . ? 
H17A C17 H17B 107.4 . . ? 
N16 C18 N11 114.3(12) . . ? 
N16 C18 H18A 108.7 . . ? 
N11 C18 H18A 108.7 . . ? 
N16 C18 H18B 108.7 . . ? 
N11 C18 H18B 108.7 . . ? 
H18A C18 H18B 107.6 . . ? 
O7 C19 N13 126.5(18) . . ? 
O7 C19 N14 125.2(16) . . ? 
N13 C19 N14 108.2(14) . . ? 
N14 C20 N15 113.3(12) . . ? 
N14 C20 C21 102.2(13) . . ? 
N15 C20 C21 104.6(12) . . ? 
N14 C20 H20 112.0 . . ? 
N15 C20 H20 112.0 . . ? 
C21 C20 H20 112.0 . . ? 
N13 C21 N16 115.8(12) . . ? 
N13 C21 C20 105.2(12) . . ? 
N16 C21 C20 103.3(13) . . ? 
N13 C21 H21 110.7 . . ? 
N16 C21 H21 110.7 . . ? 
C20 C21 H21 110.7 . . ? 
O8 C22 N15 123.5(16) . . ? 
O8 C22 N16 125.7(16) . . ? 
N15 C22 N16 110.8(14) . . ? 
N14 C23 N17 114.1(13) . . ? 
N14 C23 H23A 108.7 . . ? 
N17 C23 H23A 108.7 . . ? 
N14 C23 H23B 108.7 . . ? 
N17 C23 H23B 108.7 . . ? 
H23A C23 H23B 107.6 . . ? 
N15 C24 N20 114.1(13) . . ? 
N15 C24 H24A 108.7 . . ? 
N20 C24 H24A 108.7 . . ? 
N15 C24 H24B 108.7 . . ? 
N20 C24 H24B 108.7 . . ? 
H24A C24 H24B 107.6 . . ? 
O9 C25 N17 127.0(15) . . ? 
O9 C25 N18 125.2(15) . . ? 
N17 C25 N18 107.8(15) . . ? 
N18 C26 N19 115.0(13) . . ? 
N18 C26 C27 105.3(14) . . ? 
N19 C26 C27 102.9(13) . . ? 
N18 C26 H26 111.1 . . ? 
N19 C26 H26 111.1 . . ? 
C27 C26 H26 111.1 . . ? 
N17 C27 N20 115.8(13) . . ? 
N17 C27 C26 102.7(14) . . ? 
N20 C27 C26 104.3(14) . . ? 
N17 C27 H27 111.2 . . ? 
N20 C27 H27 111.2 . . ? 
C26 C27 H27 111.2 . . ? 
O10 C28 N19 127.7(16) . . ? 
O10 C28 N20 122.3(16) . . ? 
N19 C28 N20 109.9(14) . . ? 
N18 C29 N21 113.9(12) . . ? 
N18 C29 H29A 108.8 . . ? 
N21 C29 H29A 108.8 . . ? 
N18 C29 H29B 108.8 . . ? 
N21 C29 H29B 108.8 . . ? 
H29A C29 H29B 107.7 . . ? 
N19 C30 N24 114.1(13) . . ? 
N19 C30 H30A 108.7 . . ? 
N24 C30 H30A 108.7 . . ? 
N19 C30 H30B 108.7 . . ? 
N24 C30 H30B 108.7 . . ? 
H30A C30 H30B 107.6 . . ? 
O11 C31 N22 126.6(14) . . ? 
O11 C31 N21 125.5(14) . . ? 
N22 C31 N21 107.8(13) . . ? 
N22 C32 N23 112.9(12) . . ? 
N22 C32 C33 102.1(11) . . ? 
N23 C32 C33 102.4(11) . . ? 
N22 C32 H32 112.8 . . ? 
N23 C32 H32 112.8 . . ? 
C33 C32 H32 112.8 . . ? 
N21 C33 N24 117.1(12) . . ? 
N21 C33 C32 104.1(11) . . ? 
N24 C33 C32 103.6(11) . . ? 
N21 C33 H33 110.5 . . ? 
N24 C33 H33 110.5 . . ? 
C32 C33 H33 110.5 . . ? 
O12 C34 N24 126.1(14) . . ? 
O12 C34 N23 124.2(14) . . ? 
N24 C34 N23 109.7(13) . . ? 
N1 C35 N22 114.0(12) . . ? 
N1 C35 H35A 108.7 . . ? 
N22 C35 H35A 108.7 . . ? 
N1 C35 H35B 108.7 . . ? 
N22 C35 H35B 108.7 . . ? 
H35A C35 H35B 107.6 . . ? 
N23 C36 N4 113.4(12) . . ? 
N23 C36 H36A 108.9 . . ? 
N4 C36 H36A 108.9 . . ? 
N23 C36 H36B 108.9 . . ? 
N4 C36 H36B 108.9 . . ? 
H36A C36 H36B 107.7 . . ? 

#===END

data_10
 
_audit_creation_method            SHELXL-97 
_chemical_name_systematic         ?
_chemical_name_common             ? 
_chemical_melting_point           ? 
_chemical_formula_moiety          ? 
_chemical_formula_sum             'C36 H50 Gd2 N24 O43 Re6' 
_chemical_formula_weight          2938.70 
 
loop_ 
 _atom_type_symbol 
 _atom_type_description 
 _atom_type_scat_dispersion_real 
 _atom_type_scat_dispersion_imag 
 _atom_type_scat_source 
 'C'  'C'   0.0033   0.0016 
 'International Tables Vol C Tables 4.2.6.8 and 6.1.1.4' 
 'H'  'H'   0.0000   0.0000 
 'International Tables Vol C Tables 4.2.6.8 and 6.1.1.4' 
 'N'  'N'   0.0061   0.0033 
 'International Tables Vol C Tables 4.2.6.8 and 6.1.1.4' 
 'O'  'O'   0.0106   0.0060 
 'International Tables Vol C Tables 4.2.6.8 and 6.1.1.4' 
 'Gd'  'Gd'  -0.1653   3.9035 
 'International Tables Vol C Tables 4.2.6.8 and 6.1.1.4' 
 'Re'  'Re'  -1.0185   7.2310 
 'International Tables Vol C Tables 4.2.6.8 and 6.1.1.4' 
 
_symmetry_cell_setting            triclinic
_symmetry_space_group_name_H-M    'P -1'
 
loop_ 
 _symmetry_equiv_pos_as_xyz 
 'x, y, z' 
 '-x, -y, -z' 
 
_cell_length_a                    12.3295(9) 
_cell_length_b                    15.6924(10) 
_cell_length_c                    20.2732(12) 
_cell_angle_alpha                 67.504(4) 
_cell_angle_beta                  87.614(4) 
_cell_angle_gamma                 67.055(3) 
_cell_volume                      3310.5(4) 
_cell_formula_units_Z             2 
_cell_measurement_temperature     100(2) 
_cell_measurement_reflns_used     131901
_cell_measurement_theta_min       2.94
_cell_measurement_theta_max       25.68
 
_exptl_crystal_description        platelet
_exptl_crystal_colour             colourless
_exptl_crystal_size_max           0.17
_exptl_crystal_size_mid           0.15
_exptl_crystal_size_min           0.05
_exptl_crystal_density_meas       ? 
_exptl_crystal_density_diffrn     2.948 
_exptl_crystal_density_method     'not measured' 
_exptl_crystal_F_000              2712 
_exptl_absorpt_coefficient_mu     13.020 
_exptl_absorpt_correction_type    'multi-scan'
_exptl_absorpt_correction_T_min   0.239
_exptl_absorpt_correction_T_max   0.522
_exptl_absorpt_process_details    
'SCALEPACK (Otwinowski & Minor, 1997)'  
_exptl_special_details
'crystal-to-detector distance 40 mm'
_diffrn_ambient_temperature       100(2)
_diffrn_radiation_wavelength      0.71073 
_diffrn_radiation_type            MoK\a 
_diffrn_radiation_source          'fine-focus sealed tube' 
_diffrn_radiation_monochromator   graphite 
_diffrn_measurement_device_type   
'Nonius Kappa-CCD area-detector diffractometer'  
_diffrn_measurement_method        
'two \f and ten \w scans with 2\% steps (778 frames)' 
_diffrn_standards_interval_time   0
_diffrn_standards_number          0
_diffrn_standards_decay_%         0
_diffrn_reflns_number             131901
_diffrn_reflns_av_R_equivalents   0.0900 
_diffrn_reflns_av_sigmaI/netI     0.0986 
_diffrn_reflns_limit_h_min        -15 
_diffrn_reflns_limit_h_max        15 
_diffrn_reflns_limit_k_min        -19 
_diffrn_reflns_limit_k_max        19 
_diffrn_reflns_limit_l_min        -24 
_diffrn_reflns_limit_l_max        24 
_diffrn_reflns_theta_min          2.94 
_diffrn_reflns_theta_max          25.68 
_reflns_number_total              12462 
_reflns_number_gt                 10584 
_reflns_threshold_expression      >2sigma(I) 
 
_computing_data_collection        'COLLECT (Nonius, 1998)'
_computing_cell_refinement        'HKL2000 (Otwinowski & Minor, 1997)'
_computing_data_reduction         'HKL2000 (Otwinowski & Minor, 1997)'
_computing_structure_solution     'SHELXS-97 (Sheldrick, 2008)' 
_computing_structure_refinement   'SHELXL-97 (Sheldrick, 2008)' 
_computing_molecular_graphics     'SHELXTL (Sheldrick, 2008)' 
_computing_publication_material   
'SHELXTL (Sheldrick, 2008); PLATON (Spek, 2003)' 
 
_refine_special_details 
;
 Structure solved by direct methods and subsequent Fourier-difference
 synthesis. All non-hydrogen atoms were refined with anisotropic
 displacement parameters, with restraints for some badly behaving atoms.
 The H atoms bound to O atoms were not found. The C-bound H atoms were 
 introduced at calculated positions and were treated as riding atoms 
 with an isotropic displacement parameter equal to 1.2 times that of the 
 parent atom. Some voids in the lattice likely indicate the presence of 
 other, unresolved solvent molecules. The highest residual electron
 density peaks are located near the perrhenate groups and are likely
 indicative of unresolved disorder.
 Refinement of F^2^ against ALL reflections.  The weighted R-factor wR and 
 goodness of fit S are based on F^2^, conventional R-factors R are based 
 on F, with F set to zero for negative F^2^. The threshold expression of 
 F^2^ > 2sigma(F^2^) is used only for calculating R-factors(gt) etc. and is 
 not relevant to the choice of reflections for refinement.  R-factors based 
 on F^2^ are statistically about twice as large as those based on F, and R- 
 factors based on ALL data will be even larger. 
;
_refine_ls_structure_factor_coef  Fsqd  
_refine_ls_matrix_type            full 
_refine_ls_weighting_scheme       calc  
_refine_ls_weighting_details 
 'calc w=1/[\s^2^(Fo^2^)+17.3362P] where P=(Fo^2^+2Fc^2^)/3' 
_atom_sites_solution_primary      direct 
_atom_sites_solution_secondary    difmap 
_atom_sites_solution_hydrogens    geom 
_refine_ls_hydrogen_treatment     constr 
_refine_ls_extinction_method      none 
_refine_ls_extinction_coef        ? 
_refine_ls_number_reflns          12462 
_refine_ls_number_parameters      1000 
_refine_ls_number_restraints      74 
_refine_ls_R_factor_all           0.1249 
_refine_ls_R_factor_gt            0.1125 
_refine_ls_wR_factor_ref          0.2878 
_refine_ls_wR_factor_gt           0.2821 
_refine_ls_goodness_of_fit_ref    1.105 
_refine_ls_restrained_S_all       1.063 
_refine_ls_shift/su_max           0.003 
_refine_ls_shift/su_mean          0.001 
_diffrn_measured_fraction_theta_max    0.991 
_diffrn_reflns_theta_full              25.68 
_diffrn_measured_fraction_theta_full   0.991 
_refine_diff_density_max    6.303 
_refine_diff_density_min   -3.756 
_refine_diff_density_rms    0.652 
 
loop_ 
 _atom_site_label 
 _atom_site_type_symbol 
 _atom_site_fract_x 
 _atom_site_fract_y 
 _atom_site_fract_z 
 _atom_site_U_iso_or_equiv 
 _atom_site_adp_type 
 _atom_site_occupancy 
 _atom_site_symmetry_multiplicity 
 _atom_site_calc_flag 
 _atom_site_refinement_flags 
 _atom_site_disorder_assembly 
 _atom_site_disorder_group 
Gd1 Gd 1.00468(13) 1.11703(11) 0.58934(8) 0.0148(3) Uani 1 1 d . . . 
Gd2 Gd 0.83979(13) 0.71077(11) 1.00428(8) 0.0143(3) Uani 1 1 d . . . 
Re1 Re 1.00042(16) 0.84372(14) 0.71507(10) 0.0170(6) Uani 1 1 d . . . 
Re2 Re 1.21758(11) 1.24735(10) 0.61928(7) 0.0183(3) Uani 1 1 d . . . 
Re3 Re 0.49758(11) 0.82077(10) 1.04544(7) 0.0179(3) Uani 1 1 d . . . 
Re4 Re 0.78813(12) 0.81692(10) 1.15662(7) 0.0227(3) Uani 1 1 d . . . 
Re5 Re 0.75312(12) 0.35982(10) 0.82846(8) 0.0230(3) Uani 1 1 d . . . 
Re6 Re 0.51884(13) 0.60797(11) 0.40670(8) 0.0296(4) Uani 1 1 d . . . 
O1 O 0.8289(18) 1.1148(15) 0.6442(11) 0.015(4) Uani 1 1 d . . . 
O2 O 0.7247(18) 0.8691(16) 0.9219(13) 0.019(5) Uani 1 1 d . . . 
O3 O 1.0895(19) 1.0461(17) 0.7093(12) 0.021(5) Uani 1 1 d . . . 
O4 O 0.9781(18) 0.7913(16) 0.9771(12) 0.019(5) Uani 1 1 d . . . 
O5 O 1.333(2) 0.8332(16) 0.6953(12) 0.022(5) Uani 1 1 d . . . 
O6 O 1.2226(19) 0.5623(15) 0.9709(11) 0.016(4) Uani 1 1 d . . . 
O7 O 1.250(2) 0.7166(19) 0.6156(13) 0.029(6) Uani 1 1 d . . . 
O8 O 1.164(3) 0.435(2) 0.9007(16) 0.032(7) Uani 1 1 d U . . 
O9 O 0.9507(16) 0.7965(14) 0.5223(10) 0.009(4) Uani 1 1 d U . . 
O10 O 0.871(2) 0.5705(18) 0.8188(12) 0.029(6) Uani 1 1 d . . . 
O11 O 0.747(2) 1.0021(17) 0.5487(13) 0.025(5) Uani 1 1 d . . . 
O12 O 0.6187(19) 0.7457(18) 0.8331(11) 0.022(5) Uani 1 1 d . . . 
O13 O 1.016(2) 0.9440(18) 0.6375(16) 0.037(7) Uani 1 1 d . . . 
O14 O 1.131(3) 0.749(3) 0.754(2) 0.068(10) Uani 1 1 d . . . 
O15 O 0.934(3) 0.882(2) 0.7807(18) 0.057(9) Uani 1 1 d . . . 
O16 O 0.918(4) 0.795(3) 0.687(2) 0.071(11) Uani 1 1 d . . . 
O17 O 1.106(2) 1.2141(19) 0.5998(14) 0.031(6) Uani 1 1 d . . . 
O18 O 1.3158(19) 1.1467(18) 0.6886(15) 0.029(6) Uani 1 1 d . . . 
O19 O 1.162(2) 1.3474(17) 0.6427(13) 0.025(5) Uani 1 1 d . . . 
O20 O 1.296(3) 1.272(2) 0.5406(17) 0.039(7) Uani 1 1 d U . . 
O21 O 0.880(2) 1.1162(19) 0.5049(12) 0.026(5) Uani 1 1 d . . . 
O22 O 0.8634(19) 1.2813(17) 0.5710(14) 0.026(5) Uani 1 1 d . . . 
O23 O 1.2000(19) 1.0066(16) 0.5820(13) 0.021(5) Uani 1 1 d . . . 
O24 O 0.6528(19) 0.7658(17) 1.0468(12) 0.021(5) Uani 1 1 d U . . 
O25 O 0.4507(19) 0.9344(16) 1.0552(12) 0.019(3) Uani 1 1 d . . . 
O26 O 0.4409(17) 0.7528(15) 1.1074(11) 0.013(3) Uani 1 1 d U . . 
O27 O 0.4281(19) 0.8400(16) 0.9665(12) 0.020(3) Uani 1 1 d . . . 
O28 O 0.857(2) 0.7650(18) 1.0959(13) 0.026(5) Uani 1 1 d . . . 
O29 O 0.714(3) 0.945(2) 1.1087(17) 0.045(7) Uani 1 1 d . . . 
O30 O 0.894(2) 0.792(2) 1.2211(16) 0.039(7) Uani 1 1 d . . . 
O31 O 0.688(2) 0.7729(19) 1.1952(12) 0.027(5) Uani 1 1 d U . . 
O32 O 1.032(2) 0.5813(17) 1.0466(12) 0.023(5) Uani 1 1 d . . . 
O33 O 0.913(2) 0.706(2) 0.8923(12) 0.029(6) Uani 1 1 d . . . 
O34 O 0.748(2) 0.6337(17) 0.9588(11) 0.021(5) Uani 1 1 d . . . 
O35 O 0.822(2) 0.2343(18) 0.8917(13) 0.027(5) Uani 1 1 d U . . 
O36 O 0.867(2) 0.395(2) 0.7871(15) 0.036(6) Uani 1 1 d . . . 
O37 O 0.657(2) 0.369(2) 0.7646(14) 0.036(6) Uani 1 1 d . . . 
O38 O 0.674(2) 0.4371(18) 0.8719(14) 0.033(6) Uani 1 1 d . . . 
O39 O 0.598(4) 0.560(4) 0.492(2) 0.096(14) Uani 1 1 d . . . 
O40 O 0.363(3) 0.675(3) 0.406(2) 0.089(13) Uani 1 1 d . . . 
O41 O 0.575(3) 0.688(2) 0.3490(18) 0.048(8) Uani 1 1 d . . . 
O42 O 0.548(3) 0.506(3) 0.385(2) 0.069(11) Uani 1 1 d . . . 
O43 O 0.917(3) 1.345(3) 0.6574(17) 0.050(8) Uani 1 1 d U . . 
N1 N 0.662(2) 1.1039(18) 0.6928(11) 0.011(5) Uani 1 1 d DU . . 
N2 N 0.784(2) 1.129(2) 0.7511(14) 0.018(5) Uani 1 1 d U . . 
N3 N 0.752(2) 1.0167(19) 0.8637(14) 0.016(5) Uani 1 1 d . . . 
N4 N 0.619(2) 0.9974(19) 0.8056(14) 0.017(5) Uani 1 1 d . . . 
N5 N 0.986(3) 1.055(2) 0.8052(15) 0.024(6) Uani 1 1 d . . . 
N6 N 1.177(2) 0.9484(19) 0.8261(14) 0.017(5) Uani 1 1 d . . . 
N7 N 1.127(2) 0.837(2) 0.9341(14) 0.018(6) Uani 1 1 d . . . 
N8 N 0.952(2) 0.958(2) 0.9226(15) 0.023(6) Uani 1 1 d . . . 
N9 N 1.332(2) 0.797(2) 0.8176(16) 0.021(6) Uani 1 1 d . . . 
N10 N 1.405(2) 0.673(2) 0.7809(14) 0.018(5) Uani 1 1 d . . . 
N11 N 1.365(2) 0.561(2) 0.8925(15) 0.020(6) Uani 1 1 d . . . 
N12 N 1.285(2) 0.6922(19) 0.9226(14) 0.016(5) Uani 1 1 d . . . 
N13 N 1.343(2) 0.5891(19) 0.7218(13) 0.015(5) Uani 1 1 d . . . 
N14 N 1.199(2) 0.5793(19) 0.6627(13) 0.014(5) Uani 1 1 d . . . 
N15 N 1.177(2) 0.461(2) 0.7771(14) 0.025(6) Uani 1 1 d . . . 
N16 N 1.322(2) 0.4662(19) 0.8341(14) 0.017(5) Uani 1 1 d . . . 
N17 N 1.006(2) 0.6359(17) 0.6027(13) 0.011(5) Uani 1 1 d U . . 
N18 N 0.817(2) 0.7420(19) 0.5854(14) 0.017(5) Uani 1 1 d . . . 
N19 N 0.780(2) 0.644(2) 0.7005(14) 0.020(6) Uani 1 1 d . . . 
N20 N 0.971(2) 0.544(2) 0.7239(14) 0.019(6) Uani 1 1 d . . . 
N21 N 0.656(2) 0.8919(18) 0.5926(13) 0.015(5) Uani 1 1 d . . . 
N22 N 0.616(2) 1.0100(17) 0.6340(16) 0.026(6) Uani 1 1 d D . . 
N23 N 0.559(2) 0.9117(19) 0.7474(13) 0.016(5) Uani 1 1 d . . . 
N24 N 0.617(3) 0.785(2) 0.7103(16) 0.030(7) Uani 1 1 d . . . 
C1 C 0.763(3) 1.114(2) 0.6916(15) 0.014(6) Uani 1 1 d . . . 
C2 C 0.703(3) 1.112(3) 0.8036(17) 0.021(7) Uani 1 1 d . . . 
H2 H 0.6646 1.1690 0.8180 0.026 Uiso 1 1 calc R . . 
C3 C 0.616(3) 1.097(2) 0.7609(17) 0.020(7) Uani 1 1 d . . . 
H3 H 0.5353 1.1497 0.7533 0.024 Uiso 1 1 calc R . . 
C4 C 0.701(3) 0.953(2) 0.8674(17) 0.018(6) Uani 1 1 d . . . 
C5 C 0.888(3) 1.147(2) 0.7662(17) 0.018(6) Uani 1 1 d . . . 
H5A H 0.9101 1.1841 0.7212 0.022 Uiso 1 1 calc R . . 
H5B H 0.8661 1.1887 0.7940 0.022 Uiso 1 1 calc R . . 
C6 C 0.823(3) 1.004(2) 0.9247(17) 0.018(6) Uani 1 1 d . . . 
H6A H 0.8034 0.9619 0.9685 0.022 Uiso 1 1 calc R . . 
H6B H 0.8017 1.0695 0.9264 0.022 Uiso 1 1 calc R . . 
C7 C 1.086(3) 1.016(2) 0.7754(17) 0.019(6) Uani 1 1 d . . . 
C8 C 1.145(2) 0.930(2) 0.8979(15) 0.009(5) Uani 1 1 d . . . 
H8 H 1.1990 0.9367 0.9279 0.011 Uiso 1 1 calc R . . 
C9 C 1.018(2) 1.014(2) 0.8837(14) 0.008(5) Uani 1 1 d . . . 
H9 H 1.0146 1.0663 0.9004 0.010 Uiso 1 1 calc R . . 
C10 C 1.012(3) 0.857(2) 0.9458(16) 0.015(6) Uani 1 1 d . . . 
C11 C 1.301(3) 0.901(2) 0.8120(18) 0.019(7) Uani 1 1 d . . . 
H11A H 1.3104 0.9419 0.7641 0.022 Uiso 1 1 calc R . . 
H11B H 1.3549 0.8995 0.8462 0.022 Uiso 1 1 calc R . . 
C12 C 1.240(2) 0.742(2) 0.9688(14) 0.008(5) Uani 1 1 d . . . 
H12A H 1.2996 0.7595 0.9830 0.010 Uiso 1 1 calc R . . 
H12B H 1.2228 0.6965 1.0119 0.010 Uiso 1 1 calc R . . 
C13 C 1.353(3) 0.779(2) 0.7553(17) 0.018(6) Uani 1 1 d . . . 
C14 C 1.430(3) 0.621(2) 0.8595(16) 0.014(6) Uani 1 1 d . . . 
H14 H 1.5150 0.5829 0.8755 0.017 Uiso 1 1 calc R . . 
C15 C 1.376(3) 0.713(2) 0.8814(18) 0.021(7) Uani 1 1 d . . . 
H15 H 1.4357 0.7158 0.9102 0.026 Uiso 1 1 calc R . . 
C16 C 1.287(2) 0.601(2) 0.9319(15) 0.010(5) Uani 1 1 d . . . 
C17 C 1.430(3) 0.624(2) 0.7309(15) 0.012(6) Uani 1 1 d . . . 
H17A H 1.4358 0.6713 0.6845 0.015 Uiso 1 1 calc R . . 
H17B H 1.5067 0.5672 0.7478 0.015 Uiso 1 1 calc R . . 
C18 C 1.389(3) 0.464(2) 0.8913(16) 0.017(6) Uani 1 1 d . . . 
H18A H 1.4731 0.4321 0.8875 0.020 Uiso 1 1 calc R . . 
H18B H 1.3740 0.4215 0.9368 0.020 Uiso 1 1 calc R . . 
C19 C 1.265(3) 0.635(2) 0.6624(18) 0.022(7) Uani 1 1 d . . . 
C20 C 1.254(3) 0.482(2) 0.7231(18) 0.022(7) Uani 1 1 d . . . 
H20 H 1.2855 0.4275 0.7056 0.026 Uiso 1 1 calc R . . 
C21 C 1.357(3) 0.484(2) 0.7637(17) 0.018(6) Uani 1 1 d . . . 
H21 H 1.4350 0.4338 0.7635 0.022 Uiso 1 1 calc R . . 
C22 C 1.218(3) 0.458(2) 0.8392(16) 0.013(6) Uani 1 1 d . . . 
C23 C 1.130(3) 0.595(3) 0.6015(18) 0.020(7) Uani 1 1 d . . . 
H23A H 1.1492 0.6394 0.5589 0.024 Uiso 1 1 calc R . . 
H23B H 1.1530 0.5305 0.5974 0.024 Uiso 1 1 calc R . . 
C24 C 1.071(2) 0.448(2) 0.7691(16) 0.012(6) Uani 1 1 d . . . 
H24A H 1.0475 0.4207 0.8163 0.015 Uiso 1 1 calc R . . 
H24B H 1.0858 0.3998 0.7474 0.015 Uiso 1 1 calc R . . 
C25 C 0.925(3) 0.733(2) 0.5685(16) 0.015(6) Uani 1 1 d . . . 
C26 C 0.813(3) 0.648(2) 0.6288(17) 0.020(7) Uani 1 1 d . . . 
H26 H 0.7647 0.6289 0.6048 0.024 Uiso 1 1 calc R . . 
C27 C 0.947(3) 0.573(2) 0.6480(17) 0.017(6) Uani 1 1 d . . . 
H27 H 0.9614 0.5144 0.6365 0.021 Uiso 1 1 calc R . . 
C28 C 0.878(3) 0.583(2) 0.7547(16) 0.015(6) Uani 1 1 d . . . 
C29 C 0.706(2) 0.832(2) 0.5500(16) 0.016(6) Uani 1 1 d . . . 
H29A H 0.7204 0.8744 0.5044 0.019 Uiso 1 1 calc R . . 
H29B H 0.6468 0.8103 0.5396 0.019 Uiso 1 1 calc R . . 
C30 C 0.658(3) 0.687(3) 0.7163(18) 0.023(7) Uani 1 1 d . . . 
H30A H 0.6057 0.6831 0.6841 0.027 Uiso 1 1 calc R . . 
H30B H 0.6531 0.6447 0.7650 0.027 Uiso 1 1 calc R . . 
C31 C 0.681(3) 0.974(3) 0.5889(16) 0.020(7) Uani 1 1 d . . . 
C32 C 0.539(3) 0.962(2) 0.6673(16) 0.018(6) Uani 1 1 d . . . 
H32 H 0.4558 1.0083 0.6502 0.021 Uiso 1 1 calc R . . 
C33 C 0.572(3) 0.874(3) 0.6438(18) 0.023(7) Uani 1 1 d . . . 
H33 H 0.5015 0.8771 0.6198 0.027 Uiso 1 1 calc R . . 
C34 C 0.601(2) 0.806(2) 0.7696(14) 0.007(5) Uani 1 1 d . . . 
C35 C 0.601(3) 1.1076(18) 0.6314(13) 0.021(7) Uani 1 1 d DU . . 
H35A H 0.5165 1.1479 0.6280 0.025 Uiso 1 1 calc R . . 
H35B H 0.6290 1.1417 0.5881 0.025 Uiso 1 1 calc R . . 
C36 C 0.535(2) 0.962(2) 0.7975(15) 0.012(6) Uani 1 1 d . . . 
H36A H 0.4578 1.0180 0.7812 0.014 Uiso 1 1 calc R . . 
H36B H 0.5303 0.9145 0.8443 0.014 Uiso 1 1 calc R . . 

loop_ 
 _atom_site_aniso_label 
 _atom_site_aniso_U_11 
 _atom_site_aniso_U_22 
 _atom_site_aniso_U_33 
 _atom_site_aniso_U_23 
 _atom_site_aniso_U_13 
 _atom_site_aniso_U_12 
Gd1 0.0135(7) 0.0169(7) 0.0136(7) -0.0047(6) 0.0019(5) -0.0073(6) 
Gd2 0.0136(7) 0.0142(7) 0.0125(7) -0.0032(6) 0.0012(5) -0.0051(6) 
Re1 0.0181(10) 0.0149(10) 0.0174(10) -0.0056(8) 0.0029(7) -0.0070(7) 
Re2 0.0179(6) 0.0215(6) 0.0183(6) -0.0095(5) 0.0020(5) -0.0090(5) 
Re3 0.0132(6) 0.0180(6) 0.0217(7) -0.0082(5) 0.0035(5) -0.0052(5) 
Re4 0.0284(7) 0.0231(7) 0.0231(7) -0.0116(6) 0.0074(5) -0.0150(6) 
Re5 0.0217(7) 0.0218(7) 0.0249(7) -0.0094(6) 0.0052(5) -0.0084(5) 
Re6 0.0300(8) 0.0270(8) 0.0258(8) -0.0063(6) 0.0050(6) -0.0100(6) 
O1 0.017(10) 0.012(10) 0.017(10) -0.007(8) 0.006(8) -0.007(8) 
O2 0.014(8) 0.013(7) 0.035(9) -0.010(6) 0.006(6) -0.011(6) 
O3 0.020(8) 0.025(8) 0.014(8) -0.002(6) 0.002(6) -0.011(6) 
O4 0.014(10) 0.014(10) 0.026(11) -0.004(9) 0.014(9) -0.009(8) 
O5 0.026(11) 0.015(10) 0.017(11) 0.000(9) -0.005(9) -0.008(9) 
O6 0.019(10) 0.014(10) 0.016(10) -0.009(8) 0.003(8) -0.006(8) 
O7 0.032(12) 0.031(12) 0.022(12) -0.003(10) 0.000(10) -0.019(10) 
O8 0.032(7) 0.032(7) 0.032(7) -0.013(3) 0.0042(13) -0.013(3) 
O9 0.009(4) 0.009(4) 0.009(4) -0.0029(18) 0.0016(11) -0.0037(18) 
O10 0.034(13) 0.026(12) 0.016(11) -0.006(10) -0.005(9) -0.001(10) 
O11 0.034(12) 0.023(11) 0.025(12) -0.009(10) 0.013(10) -0.021(10) 
O12 0.020(11) 0.033(12) 0.007(10) -0.011(9) 0.001(8) -0.002(9) 
O13 0.040(14) 0.018(12) 0.051(16) -0.008(11) 0.005(12) -0.014(10) 
O14 0.063(19) 0.062(19) 0.07(2) -0.030(16) 0.001(16) -0.015(15) 
O15 0.09(2) 0.039(15) 0.055(17) -0.013(13) 0.013(15) -0.047(15) 
O16 0.08(2) 0.07(2) 0.07(2) -0.046(17) -0.005(17) -0.019(17) 
O17 0.033(13) 0.029(12) 0.035(13) -0.011(11) 0.004(10) -0.018(10) 
O18 0.008(10) 0.026(12) 0.050(15) -0.021(11) -0.011(10) 0.001(9) 
O19 0.027(11) 0.015(10) 0.033(12) -0.002(9) -0.002(10) -0.013(9) 
O20 0.039(7) 0.039(7) 0.039(7) -0.015(3) 0.0048(13) -0.016(3) 
O21 0.028(12) 0.039(13) 0.020(11) -0.009(10) -0.003(9) -0.024(10) 
O22 0.013(10) 0.015(11) 0.037(13) -0.009(10) -0.002(9) 0.006(8) 
O23 0.016(10) 0.020(11) 0.030(12) -0.010(9) 0.016(9) -0.011(9) 
O24 0.018(6) 0.022(6) 0.021(6) -0.010(4) 0.006(4) -0.004(4) 
O25 0.018(4) 0.018(4) 0.017(4) -0.007(4) 0.001(4) -0.002(4) 
O26 0.013(3) 0.013(3) 0.013(3) -0.0054(13) 0.0017(8) -0.0053(13) 
O27 0.019(4) 0.018(4) 0.017(4) -0.006(4) 0.001(4) -0.001(4) 
O28 0.026(12) 0.029(12) 0.028(12) -0.020(10) -0.004(9) -0.006(10) 
O29 0.058(16) 0.025(13) 0.053(16) -0.011(12) 0.017(13) -0.023(12) 
O30 0.034(13) 0.050(15) 0.047(15) -0.024(13) -0.001(11) -0.026(12) 
O31 0.024(8) 0.031(9) 0.018(8) -0.013(7) -0.002(6) 0.002(7) 
O32 0.022(11) 0.018(11) 0.020(11) -0.001(9) -0.004(9) -0.004(9) 
O33 0.033(12) 0.041(14) 0.014(11) -0.011(10) 0.013(9) -0.016(11) 
O34 0.027(11) 0.019(11) 0.008(10) 0.002(8) -0.006(8) -0.006(9) 
O35 0.028(9) 0.028(9) 0.026(8) -0.018(7) 0.013(7) -0.005(7) 
O36 0.013(11) 0.042(14) 0.047(15) -0.009(12) -0.009(10) -0.013(10) 
O37 0.044(14) 0.043(14) 0.025(12) -0.019(11) 0.009(11) -0.018(12) 
O38 0.030(12) 0.018(11) 0.035(13) -0.014(10) 0.012(10) 0.007(9) 
O39 0.09(2) 0.11(3) 0.07(2) -0.004(18) -0.016(18) -0.05(2) 
O40 0.036(16) 0.10(2) 0.08(2) 0.016(16) 0.025(15) -0.031(16) 
O41 0.054(16) 0.058(17) 0.055(17) -0.036(14) 0.030(13) -0.036(14) 
O42 0.059(18) 0.065(19) 0.07(2) -0.021(16) 0.031(16) -0.018(15) 
O43 0.042(10) 0.068(11) 0.050(11) -0.029(8) -0.009(7) -0.024(8) 
N1 0.012(6) 0.011(6) 0.010(6) -0.008(4) 0.001(4) -0.001(4) 
N2 0.017(7) 0.018(7) 0.015(7) -0.006(5) 0.005(4) -0.005(5) 
N3 0.014(8) 0.018(9) 0.014(9) -0.002(7) 0.004(7) -0.010(7) 
N4 0.012(11) 0.015(12) 0.016(12) 0.000(10) -0.004(9) -0.003(9) 
N5 0.030(14) 0.014(12) 0.022(13) -0.004(10) -0.003(11) -0.006(11) 
N6 0.020(9) 0.012(8) 0.019(9) -0.003(7) 0.006(7) -0.010(7) 
N7 0.017(12) 0.019(12) 0.012(12) 0.000(10) 0.007(10) -0.007(10) 
N8 0.023(13) 0.022(13) 0.017(13) -0.009(11) -0.003(10) 0.002(10) 
N9 0.005(11) 0.018(12) 0.032(14) -0.003(11) 0.005(10) -0.004(9) 
N10 0.014(11) 0.025(13) 0.014(12) -0.008(10) 0.000(9) -0.008(10) 
N11 0.022(9) 0.020(9) 0.022(9) -0.005(7) 0.003(7) -0.015(7) 
N12 0.019(12) 0.013(11) 0.020(12) -0.008(10) 0.005(10) -0.009(10) 
N13 0.016(12) 0.021(12) 0.013(11) -0.006(10) 0.002(9) -0.013(10) 
N14 0.011(8) 0.017(8) 0.010(8) -0.001(7) -0.001(6) -0.007(7) 
N15 0.017(12) 0.030(14) 0.008(12) 0.003(10) 0.005(10) 0.000(11) 
N16 0.021(12) 0.009(11) 0.014(12) -0.001(9) 0.008(10) -0.003(9) 
N17 0.011(6) 0.010(6) 0.012(6) -0.005(4) -0.002(4) -0.004(4) 
N18 0.018(12) 0.016(12) 0.023(13) -0.008(10) 0.007(10) -0.012(10) 
N19 0.019(12) 0.030(14) 0.015(12) -0.010(11) 0.008(10) -0.012(11) 
N20 0.023(13) 0.030(14) 0.020(13) -0.018(11) 0.008(10) -0.020(11) 
N21 0.013(11) 0.012(11) 0.014(12) 0.001(9) 0.003(9) -0.007(9) 
N22 0.018(13) 0.025(14) 0.026(14) -0.016(12) 0.008(11) 0.004(10) 
N23 0.017(8) 0.020(9) 0.010(8) -0.007(7) 0.003(7) -0.007(7) 
N24 0.021(13) 0.044(16) 0.025(14) -0.005(12) 0.003(11) -0.020(12) 
C1 0.012(9) 0.015(9) 0.009(9) -0.003(7) 0.000(7) -0.003(7) 
C2 0.024(15) 0.026(15) 0.019(14) -0.012(12) 0.001(12) -0.013(12) 
C3 0.020(8) 0.019(8) 0.019(8) -0.005(5) 0.005(5) -0.010(5) 
C4 0.017(8) 0.018(8) 0.018(8) -0.010(5) 0.003(5) -0.004(5) 
C5 0.021(10) 0.016(9) 0.016(9) -0.009(7) 0.008(7) -0.003(7) 
C6 0.017(9) 0.022(10) 0.019(10) -0.004(7) 0.000(7) -0.014(8) 
C7 0.022(10) 0.018(9) 0.020(10) -0.005(7) 0.007(7) -0.015(8) 
C8 0.006(8) 0.010(9) 0.008(9) 0.000(7) 0.000(7) -0.003(7) 
C9 0.010(7) 0.007(7) 0.007(7) -0.004(6) -0.002(5) -0.003(6) 
C10 0.017(9) 0.015(9) 0.012(9) -0.005(7) 0.006(7) -0.006(7) 
C11 0.013(13) 0.009(13) 0.025(15) -0.004(11) 0.005(11) 0.001(10) 
C12 0.011(7) 0.007(7) 0.006(7) -0.004(5) 0.000(4) -0.002(5) 
C13 0.013(9) 0.016(9) 0.019(10) -0.004(7) 0.001(7) -0.003(7) 
C14 0.012(7) 0.015(7) 0.014(7) -0.004(5) 0.002(4) -0.007(5) 
C15 0.022(10) 0.024(10) 0.019(10) -0.009(8) 0.005(7) -0.010(8) 
C16 0.006(7) 0.012(8) 0.009(8) -0.002(6) 0.002(6) -0.005(6) 
C17 0.014(9) 0.008(9) 0.012(9) -0.001(7) 0.009(7) -0.004(7) 
C18 0.013(13) 0.016(14) 0.012(13) -0.008(11) 0.000(10) 0.004(11) 
C19 0.023(8) 0.020(8) 0.020(8) -0.007(5) 0.004(5) -0.008(5) 
C20 0.032(16) 0.011(13) 0.024(15) -0.001(11) 0.007(13) -0.015(12) 
C21 0.016(13) 0.016(14) 0.015(14) -0.006(11) -0.004(11) 0.001(11) 
C22 0.014(7) 0.013(7) 0.012(7) -0.006(5) 0.003(4) -0.005(5) 
C23 0.015(13) 0.026(15) 0.021(15) -0.019(13) 0.008(11) -0.001(11) 
C24 0.012(12) 0.012(13) 0.013(13) -0.004(10) 0.001(10) -0.007(10) 
C25 0.012(13) 0.026(15) 0.015(13) -0.011(12) 0.005(10) -0.012(11) 
C26 0.019(10) 0.018(10) 0.017(10) -0.002(7) 0.007(7) -0.007(7) 
C27 0.018(7) 0.018(7) 0.019(8) -0.007(5) 0.001(5) -0.010(5) 
C28 0.014(7) 0.015(7) 0.016(7) -0.004(5) 0.002(5) -0.007(5) 
C29 0.008(12) 0.024(14) 0.016(13) -0.004(11) 0.001(10) -0.010(11) 
C30 0.026(10) 0.026(10) 0.017(10) -0.008(8) 0.002(7) -0.013(8) 
C31 0.015(13) 0.031(16) 0.009(13) -0.007(12) 0.005(11) -0.008(12) 
C32 0.017(9) 0.019(9) 0.012(9) -0.005(7) 0.005(7) -0.003(7) 
C33 0.019(10) 0.027(10) 0.021(10) -0.008(8) 0.010(8) -0.011(8) 
C34 0.007(5) 0.007(5) 0.007(5) -0.003(2) 0.0011(12) -0.003(2) 
C35 0.019(8) 0.022(8) 0.017(8) -0.008(5) 0.004(5) -0.004(5) 
C36 0.012(7) 0.013(7) 0.011(7) -0.006(5) 0.001(4) -0.005(5) 
 
_geom_special_details 
; 
 All esds (except the esd in the dihedral angle between two l.s. planes) 
 are estimated using the full covariance matrix.  The cell esds are taken 
 into account individually in the estimation of esds in distances, angles 
 and torsion angles; correlations between esds in cell parameters are only 
 used when they are defined by crystal symmetry.  An approximate (isotropic) 
 treatment of cell esds is used for estimating esds involving l.s. planes. 
;
loop_ 
 _geom_bond_atom_site_label_1 
 _geom_bond_atom_site_label_2
[truncated: 232,989 more chars]
